# Supplementary material
Source: publisher figshare collection journal article supplement (https://acs.figshare.com/ndownloader/files/13650692)
Supplement: Supplementary file 1 [file 13650692]

## Sheet: Experimental Design
Table S4-proteinGroups_Human_Ecoli_TMT6plex_20_40_Different_Software&Different_Statistical_Methods
Experimental Design:
1. For 6-plex TMT labeling experiment, three replicates of the 1:40 mixture of E.coli and 293T peptides were labeled with 126, 127 and 128, and another three replicates of the 1:20 mixture were labeled with 129, 130 and 131.
2. Equal amount of peptides per label were mixed and fractionated using Hp-RP to reduce sample complexity for deep peptide identification and quantification.
3. Proteome Discoverer (PD) and MaxQuant were used to analyze the TMT data, respectively.
4. In addition to the cutoff of ratio, P-value and RSD (relative standard deviation) are two commonly used statistical parameters to screen differentially regulated proteins in quantitative proteomics.

## Sheet: 30K_25%Iso_PD
Checked	Protein FDR Confidence	Master	Accession	Description	Exp. q-value	Sum PEP Score	Coverage	# Peptides	# PSMs	# Unique Peptides	# Protein Groups	# AAs	MW [kDa]	calc. pI	Modifications	Entrez Gene ID	Gene ID	Ensembl Gene ID	Chromosome	Biological Process	Cellular Component	Molecular Function	Pfam IDs	Abundance Ratio: (129) / (126)	Abundance Ratio: (130) / (127)	Abundance Ratio: (131) / (128)	Abundances (Grouped): 126	Abundances (Grouped): 127	Abundances (Grouped): 128	Abundances (Grouped): 129	Abundances (Grouped): 130	Abundances (Grouped): 131		Ratio	P value	emPAI	# Razor Peptides	Score Sequest HT	# Peptides Sequest HT
FALSE	High	Master Protein	P68431	Histone H3.1 OS=Homo sapiens GN=HIST1H3A PE=1 SV=2	0	23.0097	26.4706	5	368	2	1	136	15.394	11.12		8968; 8352; 8351; 8355; 8357; 8358; 8350; 8353; 8354; 8356	HIST1H3F; HIST1H3C; HIST1H3D; HIST1H3G; HIST1H3H; HIST1H3B; HIST1H3A; HIST1H3E; HIST1H3I; HIST1H3J	ENSG00000197153.4; ENSG00000275379.1; ENSG00000278272.1; ENSG00000277775.1; ENSG00000273983.1; ENSG00000274750.2; ENSG00000274267.1; ENSG00000197409.7; ENSG00000275714.1; ENSG00000278828.1	6	cell organization and biogenesis;coagulation;metabolic process;regulation of biological process	chromosome;extracellular;membrane;nucleus	catalytic activity;DNA binding;protein binding	Pf00125, Pf15630	0.939	0.962	0.965	431200000	419100000	420200000	404900000	403100000	405500000		0.955136	0.0351426	38.811	2	720.697	5
FALSE	High	Master Protein	U3KQK0	Histone H2B OS=Homo sapiens GN=HIST1H2BN PE=1 SV=1	0	146.825	51.8072	12	729	3	1	166	18.792	10.54		8341	HIST1H2BN	ENSG00000233822.4	6	cell organization and biogenesis;metabolic process	chromosome;cytosol;nucleus	DNA binding;protein binding	Pf00125, Pf00808	0.964	0.963	0.985	331900000	338200000	331700000	320100000	325500000	326700000		0.970553	0.0289799	56233.1	18	1831.96	12
FALSE	High	Master Protein	P62805	Histone H4 OS=Homo sapiens GN=HIST1H4A PE=1 SV=2	0	138.383	58.2524	14	606	14	1	103	11.36	11.36		8359; 8361; 8360; 8363; 8370; 554313; 8365; 8364; 121504; 8367; 8294; 8366; 8362; 8368	HIST1H4A; HIST1H4F; HIST1H4D; HIST1H4J; HIST2H4A; HIST2H4B; HIST1H4H; HIST1H4C; HIST4H4; HIST1H4E; HIST1H4I; HIST1H4B; HIST1H4K; HIST1H4L	ENSG00000197061.4; ENSG00000275126.1; ENSG00000273542.1; ENSG00000197238.4; ENSG00000197837.3; ENSG00000276966.2; ENSG00000158406.4; ENSG00000270882.2; ENSG00000274618.1; ENSG00000278637.1; ENSG00000277157.1; ENSG00000278705.1; ENSG00000270276.2; ENSG00000276180.1	6; 1; 12	cell organization and biogenesis;metabolic process;regulation of biological process;response to stimulus	chromosome;extracellular;membrane;nucleus	DNA binding;protein binding;RNA binding	Pf00125, Pf02969, Pf15630	0.998	0.935	0.949	280300000	286700000	277400000	279700000	268200000	263300000		0.960682	0.137113	1.4678e+06	0	1437.78	14
FALSE	High	Master Protein	P08238	Heat shock protein HSP 90-beta OS=Homo sapiens GN=HSP90AB1 PE=1 SV=4	0	615.358	61.4641	53	1326	20	1	724	83.212	5.03		3326	HSP90AB1	ENSG00000096384.19	6	cell organization and biogenesis;metabolic process;regulation of biological process;response to stimulus;transport	cell surface;cytoplasm;cytosol;extracellular;membrane;mitochondrion;nucleus;organelle lumen	enzyme regulator activity;nucleotide binding;protein binding;RNA binding	Pf00183, Pf02518, Pf13589	0.977	0.99	0.983	262900000	261900000	264500000	256700000	259400000	260000000		0.983276	0.0288655	8857.67	45	3343.35	53
FALSE	High	Master Protein	P60709	Actin, cytoplasmic 1 OS=Homo sapiens GN=ACTB PE=1 SV=1	0	352.931	71.7333	25	993	9	1	375	41.71	5.48		60	ACTB	ENSG00000075624.13	7	cell organization and biogenesis;cellular component movement;metabolic process;regulation of biological process;response to stimulus	cytoplasm;cytoskeleton;cytosol;membrane	DNA binding;nucleotide binding;protein binding;structural molecule activity	Pf00022	0.982	0.992	0.985	203100000	202500000	205600000	199400000	200900000	202500000		0.986257	0.0986484	7078.46	21	2305.62	25
FALSE	High	Master Protein	P06733	Alpha-enolase OS=Homo sapiens GN=ENO1 PE=1 SV=2	0	417.265	71.8894	34	923	32	1	434	47.139	7.39		2023	ENO1	ENSG00000074800.13	1	metabolic process;regulation of biological process;response to stimulus	cell surface;cytoplasm;cytosol;membrane;nucleus	catalytic activity;DNA binding;metal ion binding;protein binding;RNA binding	Pf00113, Pf03952, Pf13378	0.99	0.967	0.975	194400000	196800000	193300000	192400000	190400000	188500000		0.977417	0.0454478	23100.3	3	2441.6	34
FALSE	High	Master Protein	P11142	Heat shock cognate 71 kDa protein OS=Homo sapiens GN=HSPA8 PE=1 SV=1	0	578.354	63.6223	44	898	30	1	646	70.854	5.52		3312	HSPA8	ENSG00000109971.13	11	cell communication;cell organization and biogenesis;metabolic process;regulation of biological process;response to stimulus;transport	cytoplasm;cytosol;endosome;extracellular;membrane;nucleus;organelle lumen;spliceosomal complex	catalytic activity;nucleotide binding;protein binding;RNA binding	Pf00012, Pf02463, Pf06723	0.979	0.972	0.967	192500000	193600000	192100000	188400000	188200000	185800000		0.972674	0.0108733	14838.8	18	2376.44	44
FALSE	High	Master Protein	P13639	Elongation factor 2 OS=Homo sapiens GN=EEF2 PE=1 SV=4	0	532.687	51.6317	51	521	50	1	858	95.277	6.83		1938	EEF2	ENSG00000167658.15	19	cell differentiation;cell proliferation;metabolic process;regulation of biological process;response to stimulus;transport	cytoplasm;cytosol;extracellular;membrane;nucleus;organelle lumen;ribosome	catalytic activity;nucleotide binding;protein binding;RNA binding	Pf00009, Pf00679, Pf03144, Pf03764, Pf14492	0.971	0.998	0.996	184000000	179700000	181700000	178800000	179200000	181100000		0.988449	0.233486	1340.71	1	1446.15	51
FALSE	High	Master Protein	P06748	Nucleophosmin OS=Homo sapiens GN=NPM1 PE=1 SV=2	0	144.459	50.6803	15	254	12	1	294	32.555	4.78		4869	NPM1	ENSG00000181163.13	5	cell organization and biogenesis;metabolic process;regulation of biological process;response to stimulus;transport	cytoplasm;cytoskeleton;cytosol;membrane;nucleus	DNA binding;enzyme regulator activity;protein binding;RNA binding	Pf03066	0.954	0.958	0.968	178000000	178300000	173300000	169900000	170800000	167800000		0.960159	0.029957	999	5	640.266	15
FALSE	High	Master Protein	P68104	Elongation factor 1-alpha 1 OS=Homo sapiens GN=EEF1A1 PE=1 SV=1	0	245.484	50	19	678	10	1	462	50.109	9.01		1915	EEF1A1	ENSG00000156508.17	6	metabolic process;regulation of biological process;response to stimulus;transport	cytoplasm;cytoskeleton;cytosol;extracellular;membrane;nucleus;organelle lumen	catalytic activity;nucleotide binding;protein binding;RNA binding	Pf00009, Pf03143, Pf03144	0.977	0.916	0.94	174600000	180500000	174600000	170600000	165400000	164200000		0.944308	0.0240606	516.947	10	1451.74	19
FALSE	High	Master Protein	P14174	Macrophage migration inhibitory factor OS=Homo sapiens GN=MIF PE=1 SV=4	0.000328577	9.92569	29.5652	3	87	3	1	115	12.468	7.88		4282	MIF	ENSG00000276701.2; ENSG00000240972.1	22; CHR_HSCHR22_1_CTG7	cell organization and biogenesis;cell proliferation;cellular component movement;defense response;metabolic process;regulation of biological process;response to stimulus;transport	cell surface;cytoplasm;cytosol;extracellular;organelle lumen	catalytic activity;protein binding	Pf01187	0.631	1.047	1.493	162700000	101200000	106600000	102700000	106000000	159200000		0.992982	0.975818	5.31	0	169.491	3
FALSE	High	Master Protein	A0A0U1RRH7	Histone H2A OS=Homo sapiens PE=3 SV=1	0	88.8046	31.1765	7	576	1	1	170	18.541	11.52				ENSG00000282988.1	6		chromosome;nucleus	DNA binding;protein binding	Pf00125, Pf00808	0.949	0.96	0.981	148100000	149100000	146000000	140500000	143100000	143200000		0.962996	0.0126663	748.894	10	1452.56	7
FALSE	High	Master Protein	P04075	Fructose-bisphosphate aldolase A OS=Homo sapiens GN=ALDOA PE=1 SV=2	0	461.706	89.8352	34	673	28	1	364	39.395	8.09		226	ALDOA	ENSG00000149925.17	16	cell organization and biogenesis;cellular homeostasis;metabolic process;regulation of biological process;transport	cytoplasm;cytoskeleton;cytosol;extracellular;membrane;nucleus;organelle lumen	catalytic activity;protein binding;RNA binding	Pf00274	1.002	1.001	1.008	132000000	132400000	130600000	132200000	132600000	131600000		1.00354	0.50438	28479.4	8	2013.61	34
FALSE	High	Master Protein	F5H5D3	Tubulin alpha-1C chain OS=Homo sapiens GN=TUBA1C PE=1 SV=1	0	307.485	45.2794	25	704	9	1	519	57.693	5.07		84790	TUBA1C	ENSG00000167553.15	12	cell division;cell organization and biogenesis;transport	cytoplasm;cytoskeleton;nucleus	catalytic activity;nucleotide binding;protein binding;structural molecule activity	Pf00091, Pf03953	0.976	0.988	0.993	131800000	130700000	131100000	128600000	129100000	130200000		0.985518	0.0353748	279.722	23	1887.78	25
FALSE	High	Master Protein	P22626	Heterogeneous nuclear ribonucleoproteins A2/B1 OS=Homo sapiens GN=HNRNPA2B1 PE=1 SV=2	0	377.805	80.17	30	523	25	1	353	37.407	8.95		3181	HNRNPA2B1	ENSG00000122566.20	7	metabolic process;regulation of biological process;transport	cytoplasm;extracellular;membrane;nucleus;spliceosomal complex	DNA binding;nucleotide binding;protein binding;RNA binding	Pf00076, Pf13893, Pf14259	0.99	0.999	0.978	125400000	122800000	123300000	124200000	122700000	120600000		0.989233	0.371068	14124.4	5	1380.27	30
FALSE	High	Master Protein	Q06830	Peroxiredoxin-1 OS=Homo sapiens GN=PRDX1 PE=1 SV=1	0	185.786	78.8945	19	303	15	1	199	22.096	8.13		5052	PRDX1	ENSG00000117450.13	1	cell proliferation;cellular homeostasis;defense response;metabolic process;regulation of biological process;response to stimulus	cytoplasm;cytosol;mitochondrion;nucleus	antioxidant activity;catalytic activity;protein binding;RNA binding	Pf00578, Pf08534, Pf10417	0.991	0.989	0.968	123700000	121800000	123400000	122500000	120400000	119400000		0.982109	0.124905	3726.59	5	744.524	19
FALSE	High	Master Protein	Q32Q12	Nucleoside diphosphate kinase OS=Homo sapiens GN=NME1-NME2 PE=1 SV=1	0	152.449	66.0959	15	219	2	1	292	32.621	8.48		654364	NME1-NME2	ENSG00000011052.21	17	metabolic process	cytosol	catalytic activity;nucleotide binding	Pf00334	0.991	0.964	0.922	118200000	118100000	120500000	117100000	113900000	111100000		0.9588	0.0884719	88.615	18	554.391	15
FALSE	High	Master Protein	E7EQ64	Trypsin-1 OS=Homo sapiens GN=PRSS1 PE=1 SV=1	0	40.0369	14.5594	3	230	2	1	261	28.105	7.25				ENSG00000274247.4; ENSG00000204983.13	CHR_HSCHR7_2_CTG6; 7	metabolic process		catalytic activity	Pf00089	1	0.949	0.976	118100000	122400000	116400000	118100000	116200000	113700000		0.975063	0.254557	11.328	0	472.236	3
FALSE	High	Master Protein	P68371	Tubulin beta-4B chain OS=Homo sapiens GN=TUBB4B PE=1 SV=1	0	422.657	68.5393	26	727	2	1	445	49.799	4.89		10383	TUBB4B	ENSG00000188229.5	9	cell organization and biogenesis;cellular component movement;defense response;response to stimulus;transport	cytoplasm;cytoskeleton;cytosol;extracellular;nucleus;organelle lumen	catalytic activity;nucleotide binding;protein binding;RNA binding;structural molecule activity	Pf00091, Pf03953, Pf10644	0.969	0.97	0.964	109600000	108000000	109100000	106200000	104800000	105200000		0.96786	0.0053763	71967.6	47	1982.26	26
FALSE	High	Master Protein	P14618	Pyruvate kinase PKM OS=Homo sapiens GN=PKM PE=1 SV=4	0	461.656	67.2316	36	540	15	1	531	57.9	7.84		5315	PKM	ENSG00000067225.17	15	cell death;cell organization and biogenesis;metabolic process;response to stimulus;transport	cytoplasm;cytosol;extracellular;mitochondrion;nucleus;organelle lumen	catalytic activity;metal ion binding;nucleotide binding;protein binding;RNA binding	Pf00224, Pf02887	0.983	0.98	0.987	108200000	109000000	105900000	106300000	106900000	104600000		0.983596	0.207238	1950.29	29	1636.5	36
FALSE	High	Master Protein	P07195	L-lactate dehydrogenase B chain OS=Homo sapiens GN=LDHB PE=1 SV=2	0	264.304	52.994	21	400	19	1	334	36.615	6.05		3945	LDHB	ENSG00000111716.12	12	metabolic process	cytoplasm;cytosol;membrane;mitochondrion	catalytic activity;nucleotide binding;protein binding	Pf00056, Pf02866	0.995	0.93	0.956	108000000	112500000	109400000	107400000	104600000	104600000		0.959685	0.0591494	3161.28	0	980.724	21
FALSE	High	Master Protein	P19338	Nucleolin OS=Homo sapiens GN=NCL PE=1 SV=3	0	219.402	38.5915	37	261	16	1	710	76.568	4.7		4691	NCL	ENSG00000115053.15	2	regulation of biological process;response to stimulus	cytoplasm;membrane;nucleus	DNA binding;nucleotide binding;protein binding;RNA binding	Pf00076, Pf13893, Pf14259	0.999	0.975	0.996	107000000	108200000	105500000	106900000	105500000	105000000		0.98971	0.323947	50.348	22	626.4	37
FALSE	High	Master Protein	P62937	Peptidyl-prolyl cis-trans isomerase A OS=Homo sapiens GN=PPIA PE=1 SV=2	0	222.36	75.1515	14	508	13	1	165	18.001	7.81		5478	PPIA	ENSG00000196262.13	7	cell differentiation;cell organization and biogenesis;cellular component movement;metabolic process;regulation of biological process;transport	cytoplasm;cytosol;extracellular;membrane;nucleus;organelle lumen	catalytic activity;protein binding;RNA binding	Pf00160	0.942	0.981	0.953	101000000	97290000	100000000	95120000	95490000	95280000		0.95843	0.0636768	199525	1	959.787	14
FALSE	High	Master Protein	P16402	Histone H1.3 OS=Homo sapiens GN=HIST1H1D PE=1 SV=2	0	105.012	25.7919	11	141	11	1	221	22.336	11.02		3007	HIST1H1D	ENSG00000124575.6	6	cell organization and biogenesis;metabolic process;regulation of biological process	chromosome;nucleus	DNA binding;RNA binding	Pf00538	0.989	1.007	0.96	97900000	95500000	96520000	96870000	96200000	92670000		0.985582	0.413905	67.129	0	356.227	11
FALSE	High	Master Protein	P08670	Vimentin OS=Homo sapiens GN=VIM PE=1 SV=4	0	408.946	74.2489	46	359	41	1	466	53.619	5.12		7431	VIM	ENSG00000026025.15	10	cell differentiation;cell organization and biogenesis;cellular component movement;metabolic process;regulation of biological process;response to stimulus	cytoplasm;cytoskeleton;cytosol;membrane	protein binding;RNA binding;structural molecule activity	Pf00038, Pf04111, Pf04156, Pf04732, Pf05622, Pf10186	0.979	1	0.979	94860000	94300000	96080000	92900000	94280000	94080000		0.986047	0.125293	1518.91	4	1043.44	46
FALSE	High	Master Protein	P10809	60 kDa heat shock protein, mitochondrial OS=Homo sapiens GN=HSPD1 PE=1 SV=2	0	548.954	75.5672	51	576	51	1	573	61.016	5.87		3329	HSPD1	ENSG00000144381.16	2	cell organization and biogenesis;cell proliferation;metabolic process;regulation of biological process;response to stimulus;transport	cell surface;cytoplasm;cytosol;endoplasmic reticulum;endosome;Golgi;membrane;mitochondrion;organelle lumen	catalytic activity;DNA binding;nucleotide binding;protein binding;RNA binding	Pf00118	1.006	0.99	0.974	90980000	92160000	93220000	91550000	91240000	90800000		0.989977	0.287546	5335.7	0	1718.65	51
FALSE	High	Master Protein	P04406	Glyceraldehyde-3-phosphate dehydrogenase OS=Homo sapiens GN=GAPDH PE=1 SV=3	0	412.609	68.0597	25	773	22	1	335	36.03	8.46		2597	GAPDH	ENSG00000111640.14	12	cell death;cell organization and biogenesis;defense response;metabolic process;regulation of biological process;response to stimulus	cytoplasm;cytoskeleton;cytosol;membrane;nucleus	catalytic activity;enzyme regulator activity;nucleotide binding;protein binding	Pf00044, Pf02800	0.984	0.954	0.968	89120000	91170000	87170000	87690000	87010000	84390000		0.968706	0.143943	129154	0	1940.78	25
FALSE	High	Master Protein	I3L504	Eukaryotic translation initiation factor 5A-1 OS=Homo sapiens GN=EIF5A PE=1 SV=1	0	122.624	34.4086	11	119	3	1	186	20.49	5.25				ENSG00000132507.17	17	metabolic process;regulation of biological process		RNA binding	Pf01287	1	0.959	0.994	86770000	85710000	83550000	86780000	82220000	83060000		0.984494	0.483343	21543.3	13	354.774	11
FALSE	High	Master Protein	P32119	Peroxiredoxin-2 OS=Homo sapiens GN=PRDX2 PE=1 SV=5	0	111.456	61.6162	16	173	15	1	198	21.878	5.97		7001	PRDX2	ENSG00000167815.11	19	cellular homeostasis;metabolic process;regulation of biological process;response to stimulus	cytoplasm;cytosol	antioxidant activity;catalytic activity	Pf00578, Pf08534, Pf10417	0.998	0.984	0.978	81300000	81060000	81930000	81100000	79750000	80160000		0.986573	0.0943841	214.443	0	478.447	16
FALSE	High	Master Protein	P23396	40S ribosomal protein S3 OS=Homo sapiens GN=RPS3 PE=1 SV=2	0	128.141	78.6008	20	167	20	1	243	26.671	9.66		6188	RPS3	ENSG00000149273.14	11	cell death;cell division;cell organization and biogenesis;metabolic process;regulation of biological process;response to stimulus;transport	cytoplasm;cytoskeleton;cytosol;endoplasmic reticulum;membrane;mitochondrion;nucleus;organelle lumen;ribosome	catalytic activity;DNA binding;protein binding;RNA binding;structural molecule activity	Pf00189, Pf07650	0.967	0.972	0.967	75340000	72570000	72860000	72860000	70530000	70490000		0.968791	0.123811	111.884	0	417.892	20
FALSE	High	Master Protein	P62258	14-3-3 protein epsilon OS=Homo sapiens GN=YWHAE PE=1 SV=1	0	212.615	78.4314	23	249	20	1	255	29.155	4.74		7531	YWHAE	ENSG00000108953.16; ENSG00000274474.3	17; CHR_HSCHR17_2_CTG2	cell organization and biogenesis;cellular component movement;cellular homeostasis;metabolic process;regulation of biological process;response to stimulus;transport	cytoplasm;cytosol;membrane;mitochondrion;nucleus	protein binding;RNA binding	Pf00244	1.017	0.981	0.973	73670000	74640000	76090000	74930000	73210000	74070000		0.990241	0.449133	2579.86	5	772.23	23
FALSE	High	Master Protein	A0A0G2JIW1	Heat shock 70 kDa protein 1B OS=Homo sapiens GN=HSPA1B PE=1 SV=1	0	443.274	61.215	41	612	25	1	642	70.066	5.66				ENSG00000232804.5; ENSG00000212866.6; ENSG00000224501.5	CHR_HSCHR6_MHC_APD_CTG1; CHR_HSCHR6_MHC_QBL_CTG1; CHR_HSCHR6_MHC_COX_CTG1	cell organization and biogenesis		nucleotide binding	Pf00012, Pf06723	0.998	0.989	0.978	73620000	74450000	76730000	73470000	73660000	75060000		0.98839	0.469219	1967.42	18	1609.31	41
FALSE	High	Master Protein	P07900	Heat shock protein HSP 90-alpha OS=Homo sapiens GN=HSP90AA1 PE=1 SV=5	0	570.474	56.9672	52	1195	27	1	732	84.607	5.02		3320	HSP90AA1	ENSG00000080824.18	14	cell organization and biogenesis;metabolic process;regulation of biological process;response to stimulus;transport	cytoplasm;cytosol;extracellular;membrane;nucleus;organelle lumen	catalytic activity;enzyme regulator activity;nucleotide binding;protein binding;RNA binding	Pf00183, Pf02518, Pf13589	1.017	0.983	0.986	72140000	72900000	72730000	73340000	71650000	71690000		0.994995	0.593914	6077.32	6	3049.7	52
FALSE	High	Master Protein	P62081	40S ribosomal protein S7 OS=Homo sapiens GN=RPS7 PE=1 SV=1	0	40.5075	39.6907	9	33	9	1	194	22.113	10.1		6201	RPS7	ENSG00000171863.12	2	cell differentiation;cell organization and biogenesis;metabolic process;regulation of biological process;transport	cytoplasm;cytoskeleton;cytosol;membrane;nucleus;ribosome	protein binding;RNA binding;structural molecule activity	Pf01251	0.945	0.946	0.934	72080000	70540000	71840000	68090000	66710000	67090000		0.941388	0.00288629	22.101	0	85.9583	9
FALSE	High	Master Protein	P26641	Elongation factor 1-gamma OS=Homo sapiens GN=EEF1G PE=1 SV=3	0	185.846	46.4531	22	219	22	1	437	50.087	6.67		1937	EEF1G	ENSG00000254772.9	11	metabolic process;response to stimulus	cytoplasm;cytosol;endoplasmic reticulum;membrane;nucleus	protein binding;RNA binding	Pf00043, Pf00647, Pf02798, Pf13409, Pf13410, Pf13417, Pf14497	0.957	0.963	0.993	69680000	70220000	68760000	66690000	67640000	68260000		0.97091	0.031902	75.668	0	637.583	22
FALSE	High	Master Protein	P15880	40S ribosomal protein S2 OS=Homo sapiens GN=RPS2 PE=1 SV=2	0	122.641	51.5358	17	131	17	1	293	31.305	10.24		6187	RPS2	ENSG00000140988.15	16	cell organization and biogenesis;metabolic process;regulation of biological process;transport	cytosol;membrane;nucleus;ribosome	protein binding;RNA binding;structural molecule activity	Pf00333, Pf03719	0.936	0.992	0.954	68190000	64970000	66940000	63810000	64460000	63840000		0.96007	0.0981808	112.646	0	353.928	17
FALSE	High	Master Protein	P60842	Eukaryotic initiation factor 4A-I OS=Homo sapiens GN=EIF4A1 PE=1 SV=1	0	269.588	57.6355	28	290	14	1	406	46.125	5.48		1973	EIF4A1	ENSG00000161960.14	17	metabolic process;regulation of biological process	cytoplasm;cytosol;membrane;nucleus	catalytic activity;DNA binding;nucleotide binding;protein binding;RNA binding	Pf00270, Pf00271, Pf04851	0.966	0.928	0.993	67800000	68670000	66420000	65520000	63700000	65930000		0.961851	0.0530227	1220.68	16	767.958	28
FALSE	High	Master Protein	P05141	ADP/ATP translocase 2 OS=Homo sapiens GN=SLC25A5 PE=1 SV=7	0	124.537	47.3154	17	264	5	1	298	32.831	9.69		292	SLC25A5	ENSG00000005022.5	X	regulation of biological process;transport	membrane;mitochondrion;nucleus	protein binding;RNA binding;transporter activity	Pf00153	0.951	0.983	0.972	67050000	65100000	64290000	63780000	64020000	62490000		0.968693	0.113148	78.433	15	807.406	17
FALSE	High	Master Protein	Q5TEC6	Histone H3 OS=Homo sapiens GN=HIST2H3PS2 PE=1 SV=1	0	20.4191	40.4412	5	244	2	1	136	15.421	11.27		440686	HIST2H3PS2	ENSG00000203818.7	1		chromosome;nucleus	DNA binding;protein binding	Pf00125	0.938	0.905	0.924	66710000	66740000	63360000	62560000	60370000	58580000		0.92226	0.0337766	6.197	0	442.616	5
FALSE	High	Master Protein	O60361	Putative nucleoside diphosphate kinase OS=Homo sapiens GN=NME2P1 PE=5 SV=1	0	92.3405	59.854	7	125	1	1	137	15.519	8.57		283458	NME2P1		12	metabolic process	cytosol;nucleus	catalytic activity;metal ion binding;nucleotide binding	Pf00334	0.974	1.008	0.947	65130000	65710000	65020000	63420000	66230000	61600000		0.976463	0.371991	198.526	0	326.88	7
FALSE	High	Master Protein	P60174	Triosephosphate isomerase OS=Homo sapiens GN=TPI1 PE=1 SV=3	0	299.531	69.9301	22	376	22	1	286	30.772	5.92		7167	TPI1	ENSG00000111669.14	12	development;metabolic process	cytosol;nucleus	catalytic activity;protein binding	Pf00121	0.998	0.992	0.972	64900000	63220000	65730000	64790000	62720000	63920000		0.987516	0.446127	1831.98	0	1069.85	22
FALSE	High	Master Protein	Q02878	60S ribosomal protein L6 OS=Homo sapiens GN=RPL6 PE=1 SV=3	0	172.068	51.7361	22	139	22	1	288	32.708	10.58		6128	RPL6	ENSG00000089009.15	12	cell organization and biogenesis;metabolic process;regulation of biological process;transport	cytosol;membrane;nucleus;ribosome	DNA binding;protein binding;RNA binding;structural molecule activity	Pf01159, Pf03868	0.978	0.988	1.002	64050000	63240000	63070000	62650000	62510000	63210000		0.989546	0.155647	1164.91	0	401.547	22
FALSE	High	Master Protein	J3KQE5	GTP-binding nuclear protein Ran (Fragment) OS=Homo sapiens GN=RAN PE=1 SV=1	0	100.806	45.2991	16	208	16	1	234	26.799	9.58				ENSG00000132341.11	12	regulation of biological process;response to stimulus;transport	nucleus	catalytic activity;nucleotide binding	Pf00025, Pf00071, Pf08477	1.013	0.991	1.002	63220000	64910000	64650000	64060000	64320000	64810000		1.00213	0.827525	283.804	0	394.71	16
FALSE	High	Master Protein	P60866	40S ribosomal protein S20 OS=Homo sapiens GN=RPS20 PE=1 SV=1	0	36.1358	31.9328	5	28	5	1	119	13.364	9.94		6224	RPS20	ENSG00000008988.9	8	cell organization and biogenesis;metabolic process;transport	cytoplasm;cytosol;membrane;ribosome	protein binding;RNA binding;structural molecule activity	Pf00338	0.932	0.975	0.959	63010000	61560000	61670000	58710000	60030000	59120000		0.955004	0.0108113	157.489	0	68.3536	5
FALSE	High	Master Protein	P61247	40S ribosomal protein S3a OS=Homo sapiens GN=RPS3A PE=1 SV=2	0	156.627	64.7727	23	135	23	1	264	29.926	9.73		6189	RPS3A	ENSG00000145425.9	4	cell differentiation;cell organization and biogenesis;metabolic process;regulation of biological process;transport	cytoplasm;cytosol;endoplasmic reticulum;nucleus;ribosome	protein binding;RNA binding;structural molecule activity	Pf01015	0.96	0.948	0.986	62790000	63020000	60020000	60250000	59760000	59170000		0.964215	0.137983	999	0	366.812	23
FALSE	High	Master Protein	P61604	10 kDa heat shock protein, mitochondrial OS=Homo sapiens GN=HSPE1 PE=1 SV=2	0	73.9334	81.3725	12	157	6	1	102	10.925	8.92		3336	HSPE1	ENSG00000115541.10	2	cell differentiation;metabolic process;regulation of biological process;response to stimulus	cytoplasm;membrane;mitochondrion;organelle lumen	metal ion binding;nucleotide binding;protein binding;RNA binding	Pf00166	0.982	0.957	0.969	62550000	61900000	61720000	61420000	59220000	59820000		0.969329	0.0865975	315.228	7	450.24	12
FALSE	High	Master Protein	P40926	Malate dehydrogenase, mitochondrial OS=Homo sapiens GN=MDH2 PE=1 SV=3	0	221.878	68.0473	20	207	20	1	338	35.481	8.68		4191	MDH2	ENSG00000146701.11	7	metabolic process	membrane;mitochondrion;nucleus;organelle lumen	catalytic activity;nucleotide binding;protein binding;RNA binding	Pf00056, Pf01073, Pf01118, Pf02866, Pf13460	0.973	0.97	0.951	60730000	60190000	60240000	59110000	58400000	57270000		0.964783	0.0470588	267.27	0	636.046	20
FALSE	High	Master Protein	P00338	L-lactate dehydrogenase A chain OS=Homo sapiens GN=LDHA PE=1 SV=2	0	179.189	54.2169	23	266	21	1	332	36.665	8.27		3939	LDHA	ENSG00000134333.13	11	metabolic process;regulation of biological process;response to stimulus	cytoplasm;cytosol;membrane;nucleus	catalytic activity;nucleotide binding;protein binding	Pf00056, Pf02866	0.978	0.997	0.949	60570000	59120000	60410000	59230000	58960000	57300000		0.974403	0.117597	783.76	2	632.248	23
FALSE	High	Master Protein	E5RJD8	Tubulin-specific chaperone A OS=Homo sapiens GN=TBCA PE=1 SV=1	0	84.281	47.0588	11	55	11	1	119	14.297	5.12				ENSG00000171530.13	5	cell organization and biogenesis;metabolic process	cytoplasm;cytoskeleton	protein binding	Pf02970	1	0.966	0.997	59450000	59640000	57920000	59420000	57630000	57740000		0.987458	0.404781	2681.7	0	162.969	11
FALSE	High	Master Protein	P38646	Stress-70 protein, mitochondrial OS=Homo sapiens GN=HSPA9 PE=1 SV=2	0	432.002	54.9337	44	388	44	1	679	73.635	6.16		3313	HSPA9	ENSG00000113013.12	5	cell differentiation;cell organization and biogenesis;metabolic process;regulation of biological process;transport	cytoplasm;mitochondrion;nucleus;organelle lumen	nucleotide binding;protein binding;RNA binding	Pf00012, Pf06723	0.975	0.971	0.989	57600000	57100000	57360000	56160000	55440000	56740000		0.97838	0.0661159	521.335	0	1212.8	44
FALSE	High	Master Protein	P39019	40S ribosomal protein S19 OS=Homo sapiens GN=RPS19 PE=1 SV=2	0	124.238	63.4483	14	141	7	1	145	16.051	10.32		6223	RPS19	ENSG00000105372.6	19	cell differentiation;cell organization and biogenesis;cellular component movement;defense response;metabolic process;regulation of biological process;response to stimulus;transport	cytoplasm;cytosol;membrane;nucleus;ribosome	protein binding;RNA binding;structural molecule activity	Pf01090	0.985	0.995	0.958	55640000	53870000	55160000	54820000	53620000	52840000		0.979413	0.222276	3980.07	8	388.601	14
FALSE	High	Master Protein	Q00839	Heterogeneous nuclear ribonucleoprotein U OS=Homo sapiens GN=HNRNPU PE=1 SV=6	0	320.936	42.1818	35	286	35	1	825	90.528	6		3192	HNRNPU	ENSG00000153187.18	1	cell differentiation;metabolic process;regulation of biological process	cell surface;cytoplasm;membrane;nucleus;spliceosomal complex	DNA binding;nucleotide binding;protein binding;RNA binding	Pf00622, Pf13671	0.992	1.025	0.972	55060000	54150000	55900000	54610000	55480000	54360000		0.996003	0.738538	315.228	0	762.36	35
FALSE	High	Master Protein	B2R5W2	Heterogeneous nuclear ribonucleoproteins C1/C2 OS=Homo sapiens GN=HNRNPC PE=1 SV=1	0	213.194	53.7931	21	222	21	1	290	31.929	5.24		3183	HNRNPC	ENSG00000092199.17	14	cell differentiation;cell organization and biogenesis;metabolic process;regulation of biological process	cytosol;membrane;nucleus;spliceosomal complex	DNA binding;nucleotide binding;protein binding;RNA binding	Pf00076, Pf13893, Pf14259	0.964	0.962	0.948	53260000	52750000	53740000	51360000	50760000	50930000		0.958059	0.00489826	1144.05	0	638.579	21
FALSE	High	Master Protein	P22314	Ubiquitin-like modifier-activating enzyme 1 OS=Homo sapiens GN=UBA1 PE=1 SV=3	0	427.84	45.3686	44	306	35	1	1058	117.774	5.76		7317	UBA1	ENSG00000130985.16	X	metabolic process;response to stimulus	cytoplasm;cytosol;membrane;mitochondrion;nucleus	catalytic activity;nucleotide binding;protein binding;RNA binding	Pf00899, Pf02134, Pf09358, Pf10585	0.993	0.993	0.966	52790000	51960000	53120000	52440000	51580000	51310000		0.983911	0.155761	51.396	10	1054.01	44
FALSE	High	Master Protein	P68032	Actin, alpha cardiac muscle 1 OS=Homo sapiens GN=ACTC1 PE=1 SV=1	0	176.516	38.4615	18	768	3	1	377	41.992	5.39		70	ACTC1	ENSG00000159251.6	15	cell death;cell organization and biogenesis;cellular component movement;regulation of biological process;response to stimulus	cytoplasm;cytoskeleton;cytosol;membrane	catalytic activity;nucleotide binding;protein binding	Pf00022	0.987	0.959	0.971	50340000	50540000	49980000	49680000	48460000	48510000		0.972093	0.0561238	397.107	0	1502.33	18
FALSE	High	Master Protein	P0C0S5	Histone H2A.Z OS=Homo sapiens GN=H2AFZ PE=1 SV=2	0	37.2469	31.25	4	291	2	1	128	13.545	10.58		3015	H2AFZ	ENSG00000164032.11	4	regulation of biological process;response to stimulus	chromosome;nucleus	DNA binding;protein binding	Pf00125	1.022	0.965	0.993	50260000	52370000	50360000	51370000	50520000	50020000		0.992941	0.678711	62.096	0	635.534	4
FALSE	High	Master Protein	P00558	Phosphoglycerate kinase 1 OS=Homo sapiens GN=PGK1 PE=1 SV=3	0	415.864	78.1775	32	386	32	1	417	44.586	8.1		5230	PGK1	ENSG00000102144.13	X	cell differentiation;metabolic process;regulation of biological process;response to stimulus	cytoplasm;cytosol;membrane	catalytic activity;nucleotide binding;protein binding	Pf00162	0.993	0.984	0.976	50120000	49960000	49750000	49760000	49150000	48530000		0.984049	0.144989	9999	0	1159.24	32
FALSE	High	Master Protein	P61978	Heterogeneous nuclear ribonucleoprotein K OS=Homo sapiens GN=HNRNPK PE=1 SV=1	0	187.901	46.2203	22	198	5	1	463	50.944	5.54		3190	HNRNPK	ENSG00000165119.20	9	metabolic process;regulation of biological process;response to stimulus	cytoplasm;membrane;nucleus;spliceosomal complex	DNA binding;protein binding;RNA binding	Pf00013, Pf08067, Pf13014, Pf13083	1.002	0.93	0.997	49810000	51190000	49840000	49910000	47620000	49680000		0.975935	0.244328	90.525	18	573.135	22
FALSE	High	Master Protein	E9PR30	40S ribosomal protein S30 OS=Homo sapiens GN=FAU PE=1 SV=1	0	19.9584	38.7755	5	23	5	1	98	10.898	11.56				ENSG00000149806.10	11	metabolic process	ribosome	structural molecule activity	Pf04758	0.987	0.999	0.973	49000000	50070000	50330000	48380000	50000000	48950000		0.986145	0.332925	55.234	0	59.0133	5
FALSE	High	Master Protein	P46781	40S ribosomal protein S9 OS=Homo sapiens GN=RPS9 PE=1 SV=3	0	77.9917	59.2784	18	85	18	1	194	22.578	10.65		6203	RPS9	ENSG00000274005.3; ENSG00000275323.3; ENSG00000277079.3; ENSG00000278081.3; ENSG00000277359.3; ENSG00000170889.13; ENSG00000274950.4; ENSG00000274626.3; ENSG00000278270.4; ENSG00000274646.4	19; CHR_HSCHR19LRC_LRC_T_CTG3_1; CHR_HSCHR19LRC_LRC_J_CTG3_1; CHR_HSCHR19LRC_PGF2_CTG3_1; CHR_HSCHR19LRC_LRC_S_CTG3_1; CHR_HSCHR19LRC_LRC_I_CTG3_1; CHR_HSCHR19LRC_PGF1_CTG3_1; CHR_HSCHR19LRC_COX2_CTG3_1; CHR_HSCHR19_4_CTG3_1; CHR_HSCHR19LRC_COX1_CTG3_1	cell organization and biogenesis;metabolic process;regulation of biological process;transport	cytoplasm;cytosol;membrane;nucleus;ribosome	protein binding;RNA binding;structural molecule activity;translation regulator activity	Pf00163, Pf01479	1.028	0.999	0.951	48640000	49630000	51940000	50000000	49560000	49380000		0.991545	0.709441	656.933	0	197.653	18
FALSE	High	Master Protein	P62851	40S ribosomal protein S25 OS=Homo sapiens GN=RPS25 PE=1 SV=1	0	52.1466	44.8	7	95	7	1	125	13.734	10.11		6230	RPS25	ENSG00000280831.2; ENSG00000118181.10	11; CHR_HG2217_PATCH	cell organization and biogenesis;metabolic process;transport	cytosol;nucleus;ribosome	catalytic activity;nucleotide binding;protein binding;RNA binding;structural molecule activity	Pf03297	0.98	0.985	0.973	47400000	47790000	47720000	46450000	47080000	46420000		0.979288	0.0257179	999	0	256.774	7
FALSE	High	Master Protein	P12277	Creatine kinase B-type OS=Homo sapiens GN=CKB PE=1 SV=1	0	292.27	53.2808	20	619	20	1	381	42.617	5.59		1152	CKB	ENSG00000166165.12	14	cellular homeostasis;metabolic process	cytoplasm;cytosol;mitochondrion;nucleus	catalytic activity;nucleotide binding;protein binding	Pf00217, Pf02807	0.999	0.988	0.986	47300000	47050000	46840000	47250000	46500000	46190000		0.991147	0.318563	5993.84	0	1654.6	20
FALSE	High	Master Protein	E9PK25	Cofilin-1 OS=Homo sapiens GN=CFL1 PE=1 SV=1	0	146.095	46.5686	14	118	12	1	204	22.714	8.34				ENSG00000172757.12	11	cell organization and biogenesis	cytoskeleton	protein binding	Pf00241	0.984	0.968	0.979	46640000	47230000	48110000	45880000	45730000	47120000		0.977109	0.152264	561.341	2	345.945	14
FALSE	High	Master Protein	P49207	60S ribosomal protein L34 OS=Homo sapiens GN=RPL34 PE=1 SV=3	0	30.4896	36.7521	6	37	6	1	117	13.284	11.47		6164	RPL34	ENSG00000109475.16	4	cell organization and biogenesis;metabolic process;transport	cytosol;mitochondrion;ribosome	protein binding;RNA binding;structural molecule activity	Pf01199	1.036	0.99	0.978	45880000	46410000	46920000	47510000	45960000	45890000		1.00108	0.939383	214.443	0	94.7227	6
FALSE	High	Master Protein	Q14103	Heterogeneous nuclear ribonucleoprotein D0 OS=Homo sapiens GN=HNRNPD PE=1 SV=1	0	194.89	46.7606	24	140	3	1	355	38.41	7.81		3184	HNRNPD	ENSG00000138668.18	4	cell organization and biogenesis;metabolic process;regulation of biological process;response to stimulus	cytoplasm;cytosol;nucleus	DNA binding;nucleotide binding;protein binding;RNA binding	Pf00076, Pf13893, Pf14259	1.003	0.969	0.943	45860000	47250000	48400000	46020000	45760000	45660000		0.971239	0.20385	7195.86	20	377.415	24
FALSE	High	Master Protein	Q5SNV9	Uncharacterized protein C1orf167 OS=Homo sapiens GN=C1orf167 PE=2 SV=2	0.0036888	4.45839	0.544959	1	4	1	1	1468	162.321	10.7		284498	C1orf167	ENSG00000215910.7	1					1.058	1.06	0.967	45390000	42220000	45620000	48000000	44770000	44130000		1.02755	0.493527	0.062	0	6.68044	1
FALSE	High	Master Protein	P50990	T-complex protein 1 subunit theta OS=Homo sapiens GN=CCT8 PE=1 SV=4	0	383.197	64.0511	37	290	37	1	548	59.583	5.6		10694	CCT8	ENSG00000156261.12	21	cell organization and biogenesis;metabolic process;regulation of biological process;transport	cytoplasm;cytoskeleton;cytosol;extracellular;organelle lumen	catalytic activity;nucleotide binding;protein binding	Pf00118	0.997	0.979	0.973	45110000	44170000	45590000	44990000	43220000	44350000		0.982872	0.31375	427.133	0	880.952	37
FALSE	High	Master Protein	P62280	40S ribosomal protein S11 OS=Homo sapiens GN=RPS11 PE=1 SV=3	0	102.595	62.6582	16	92	16	1	158	18.419	10.3		6205	RPS11	ENSG00000142534.6	19	cell differentiation;cell organization and biogenesis;metabolic process;transport	cytoplasm;cytosol;membrane;ribosome	protein binding;RNA binding;structural molecule activity	Pf00366	1.002	0.97	1.005	44290000	45950000	45340000	44390000	44580000	45580000		0.992403	0.605196	3161.28	0	267.508	16
FALSE	High	Master Protein	P31948	Stress-induced-phosphoprotein 1 OS=Homo sapiens GN=STIP1 PE=1 SV=1	0	312.651	65.0092	51	235	51	1	543	62.599	6.8		10963	STIP1	ENSG00000168439.16	11	response to stimulus	cytoplasm;cytosol;Golgi;nucleus	protein binding;RNA binding	Pf00515, Pf12895, Pf13414, Pf13424, Pf13432	1.007	1.02	0.989	43710000	43320000	44140000	44030000	44200000	43650000		1.00541	0.461822	731.597	0	608.978	51
FALSE	High	Master Protein	P07237	Protein disulfide-isomerase OS=Homo sapiens GN=P4HB PE=1 SV=3	0	251.467	59.252	35	169	2	1	508	57.081	4.87		5034	P4HB	ENSG00000185624.14	17	cell organization and biogenesis;cellular homeostasis;metabolic process;regulation of biological process;response to stimulus	endoplasmic reticulum;extracellular;membrane;organelle lumen	catalytic activity;metal ion binding;protein binding;RNA binding	Pf00085, Pf01216, Pf13098, Pf13848, Pf13899, Pf13905	0.989	1.022	0.995	43360000	42800000	43250000	42900000	43720000	43040000		1.00193	0.800444	99	34	502.167	35
FALSE	High	Master Protein	P62701	40S ribosomal protein S4, X isoform OS=Homo sapiens GN=RPS4X PE=1 SV=2	0	177.046	63.4981	19	134	19	1	263	29.579	10.15		6191	RPS4X	ENSG00000198034.10	X	cell organization and biogenesis;development;metabolic process;regulation of biological process;transport	cytoplasm;cytosol;membrane;ribosome	protein binding;RNA binding;structural molecule activity	Pf00900, Pf08071	0.982	0.98	0.948	41840000	42580000	43110000	41100000	41720000	40850000		0.969733	0.0522921	1358.36	0	363.923	19
FALSE	High	Master Protein	P62913	60S ribosomal protein L11 OS=Homo sapiens GN=RPL11 PE=1 SV=2	0	43.8454	25.8427	6	84	6	1	178	20.24	9.6		6135	RPL11	ENSG00000142676.12	1	cell organization and biogenesis;metabolic process;regulation of biological process;transport	cytoplasm;cytosol;membrane;nucleus;ribosome	protein binding;RNA binding;structural molecule activity	Pf00281, Pf00673	0.979	1.014	0.963	41500000	41950000	42470000	40610000	42520000	40880000		0.984832	0.409033	26.826	0	162.229	6
FALSE	High	Master Protein	P09936	Ubiquitin carboxyl-terminal hydrolase isozyme L1 OS=Homo sapiens GN=UCHL1 PE=1 SV=2	0	136.645	60.5381	13	67	13	1	223	24.808	5.48		7345	UCHL1	ENSG00000154277.12	4	cell communication;cell organization and biogenesis;cell proliferation;cellular component movement;metabolic process;regulation of biological process;response to stimulus;transport	cytoplasm;cytosol;endoplasmic reticulum;membrane	catalytic activity;protein binding	Pf01088	0.979	0.99	0.984	41250000	40920000	41270000	40410000	40500000	40630000		0.984608	0.0147973	810.131	0	247.998	13
FALSE	High	Master Protein	O43175	D-3-phosphoglycerate dehydrogenase OS=Homo sapiens GN=PHGDH PE=1 SV=4	0	293.26	48.7805	28	243	28	1	533	56.614	6.71		26227	PHGDH	ENSG00000092621.11	1	cell differentiation;cell organization and biogenesis;metabolic process;regulation of biological process	cytosol	catalytic activity;nucleotide binding	Pf00389, Pf02826	0.981	0.981	0.986	40940000	40910000	40800000	40160000	40120000	40230000		0.982552	0.000278161	617.966	0	810.504	28
FALSE	High	Master Protein	J3KTA4	Probable ATP-dependent RNA helicase DDX5 OS=Homo sapiens GN=DDX5 PE=1 SV=1	0	267.383	54.2345	37	198	29	1	614	69.044	8.85		1655	DDX5	ENSG00000108654.13	17	cell growth;metabolic process;regulation of biological process;response to stimulus	membrane;nucleus;spliceosomal complex	catalytic activity;nucleotide binding;protein binding;RNA binding	Pf00270, Pf00271, Pf08061	1.007	0.964	0.994	40900000	41730000	40670000	41190000	40250000	40430000		0.988402	0.332459	192.07	8	582.6	37
FALSE	High	Master Protein	P09874	Poly [ADP-ribose] polymerase 1 OS=Homo sapiens GN=PARP1 PE=1 SV=4	0	532.283	47.3373	64	333	64	1	1014	113.012	8.88		142	PARP1	ENSG00000143799.12	1	cell differentiation;cell organization and biogenesis;metabolic process;regulation of biological process;response to stimulus	membrane;mitochondrion;nucleus	catalytic activity;DNA binding;metal ion binding;nucleotide binding;protein binding;RNA binding	Pf00533, Pf00644, Pf00645, Pf02877, Pf05406, Pf08063	1.016	0.997	0.997	40730000	41290000	41260000	41390000	41170000	41120000		1.00324	0.555625	504.48	0	971.24	64
FALSE	High	Master Protein	P30049	ATP synthase subunit delta, mitochondrial OS=Homo sapiens GN=ATP5D PE=1 SV=2	0	21.2753	13.6905	2	16	2	1	168	17.479	5.49		513	ATP5D	ENSG00000099624.7	19	cell organization and biogenesis;metabolic process;response to stimulus;transport	membrane;mitochondrion;organelle lumen	catalytic activity;nucleotide binding;transporter activity	Pf02823	0.936	0.956	1.092	40110000	40490000	38490000	37560000	38730000	42030000		0.993534	0.873407	5.813	0	52.6896	2
FALSE	High	Master Protein	P0A9B2	Glyceraldehyde-3-phosphate dehydrogenase A OS=Escherichia coli (strain K12) GN=gapA PE=1 SV=2	0	224.313	68.5801	28	247	24	1	331	35.51	7.11		947679	gapA; SH08_13020; SH03_12920; SH06_13225; SH04_12910; SH07_12915; SF31_13225			metabolic process	cytoplasm;cytosol;membrane	catalytic activity;nucleotide binding	Pf00044, Pf01113, Pf02800	1.321	1.196	1.257	39880000	42760000	41730000	52700000	51130000	52440000		1.25649	0.00122149	999	6	599.868	28
FALSE	High	Master Protein	P05387	60S acidic ribosomal protein P2 OS=Homo sapiens GN=RPLP2 PE=1 SV=1	0	139.249	77.3913	8	197	6	1	115	11.658	4.54		6181	RPLP2	ENSG00000177600.8	11	cell organization and biogenesis;metabolic process;transport	cytosol;membrane;ribosome	protein binding;structural molecule activity	Pf00428	0.986	0.995	1.014	39580000	39450000	39560000	39010000	39250000	40110000		0.998145	0.847129	9999	3	488.989	8
FALSE	High	Master Protein	P07737	Profilin-1 OS=Homo sapiens GN=PFN1 PE=1 SV=2	0	142.226	71.4286	11	174	11	1	140	15.045	8.27		5216	PFN1	ENSG00000108518.7	17	cell organization and biogenesis;regulation of biological process;response to stimulus	cytoplasm;cytoskeleton;cytosol;membrane;nucleus	enzyme regulator activity;nucleotide binding;protein binding;RNA binding	Pf00235	0.979	0.968	0.961	39470000	39760000	40550000	38650000	38500000	38960000		0.96936	0.0471133	12914.5	0	470.2	11
FALSE	High	Master Protein	P36578	60S ribosomal protein L4 OS=Homo sapiens GN=RPL4 PE=1 SV=5	0	255.12	46.37	24	220	24	1	427	47.667	11.06		6124	RPL4	ENSG00000174444.14	15	cell organization and biogenesis;metabolic process;transport	cytoplasm;cytosol;endoplasmic reticulum;membrane;nucleus;ribosome	protein binding;RNA binding;structural molecule activity	Pf00573, Pf14374	0.992	0.984	0.998	39070000	38870000	38360000	38750000	38260000	38270000		0.99123	0.274864	3873.68	0	665.105	24
FALSE	High	Master Protein	P48643	T-complex protein 1 subunit epsilon OS=Homo sapiens GN=CCT5 PE=1 SV=1	0	282.207	48.4288	31	209	30	1	541	59.633	5.66		22948	CCT5	ENSG00000150753.11	5	metabolic process;regulation of biological process;response to stimulus;transport	cytoplasm;cytoskeleton;cytosol	nucleotide binding;protein binding;RNA binding	Pf00118	0.982	0.978	0.968	37830000	38140000	38370000	37150000	37290000	37150000		0.975949	0.0207392	275.17	0	629.198	31
FALSE	High	Master Protein	P18124	60S ribosomal protein L7 OS=Homo sapiens GN=RPL7 PE=1 SV=1	0	174.048	55.2419	18	167	18	1	248	29.207	10.65		6129	RPL7	ENSG00000147604.13	8	cell organization and biogenesis;metabolic process;transport	cytoplasm;cytosol;membrane;nucleus;ribosome	DNA binding;protein binding;RNA binding;structural molecule activity	Pf00327, Pf08079	0.995	0.992	0.958	37560000	36820000	36680000	37390000	36520000	35150000		0.981992	0.422603	9999	0	458.365	18
FALSE	High	Master Protein	P09651	Heterogeneous nuclear ribonucleoprotein A1 OS=Homo sapiens GN=HNRNPA1 PE=1 SV=5	0	330.25	59.9462	24	414	3	1	372	38.723	9.13		3178	HNRNPA1	ENSG00000135486.17	12	cell communication;metabolic process;regulation of biological process;response to stimulus;transport	cytoplasm;membrane;nucleus;spliceosomal complex	DNA binding;nucleotide binding;protein binding;RNA binding	Pf00076, Pf13893, Pf14259	1.034	0.979	1.024	37500000	38900000	38740000	38780000	38090000	39680000		1.01225	0.502541	8857.67	20	1158.26	24
FALSE	High	Master Protein	P62263	40S ribosomal protein S14 OS=Homo sapiens GN=RPS14 PE=1 SV=3	0	98.2157	41.0596	9	56	9	1	151	16.263	10.05		6208	RPS14	ENSG00000164587.11	5	cell differentiation;cell organization and biogenesis;metabolic process;regulation of biological process;transport	cytosol;membrane;mitochondrion;ribosome	protein binding;receptor activity;RNA binding;structural molecule activity;translation regulator activity	Pf00411	0.95	0.982	0.986	37270000	37030000	36420000	35400000	36360000	35930000		0.972634	0.0552181	63094.7	0	179.339	9
FALSE	High	Master Protein	P00918	Carbonic anhydrase 2 OS=Homo sapiens GN=CA2 PE=1 SV=2	0	186.919	63.4615	15	154	15	1	260	29.228	7.4		760	CA2	ENSG00000104267.9	8	cellular homeostasis;metabolic process;regulation of biological process;response to stimulus;transport	cytoplasm;cytosol;membrane	catalytic activity;metal ion binding;protein binding	Pf00194	0.991	0.985	0.957	37160000	37340000	38480000	36830000	36800000	36810000		0.977518	0.176985	1164.91	0	429.585	15
FALSE	High	Master Protein	P46776	60S ribosomal protein L27a OS=Homo sapiens GN=RPL27A PE=1 SV=2	0	56.7401	45.9459	9	68	9	1	148	16.551	11		6157	RPL27A	ENSG00000166441.12	11	cell organization and biogenesis;metabolic process;transport	cytosol;endoplasmic reticulum;membrane;ribosome	protein binding;RNA binding;structural molecule activity	Pf00828	0.948	0.97	0.993	37040000	35380000	36200000	35130000	34320000	35960000		0.970447	0.187406	516.947	0	164.786	9
FALSE	High	Master Protein	P10599	Thioredoxin OS=Homo sapiens GN=TXN PE=1 SV=3	0	33.4688	40	6	39	6	1	105	11.73	4.92		7295	TXN	ENSG00000136810.12	9	cell communication;cell proliferation;cellular component movement;cellular homeostasis;metabolic process;regulation of biological process;response to stimulus;transport	cytoplasm;cytosol;extracellular;mitochondrion;nucleus	antioxidant activity;catalytic activity;protein binding;RNA binding	Pf00085, Pf00462, Pf13098, Pf13899, Pf13905	1.032	1.022	1.017	37000000	37040000	39140000	38170000	37870000	39810000		1.02359	0.393552	36.276	0	101.396	6
FALSE	High	Master Protein	Q8NC51	Plasminogen activator inhibitor 1 RNA-binding protein OS=Homo sapiens GN=SERBP1 PE=1 SV=2	0	280.254	50.2451	29	196	29	1	408	44.938	8.65		26135	SERBP1	ENSG00000142864.14	1	regulation of biological process	cytoplasm;cytosol;membrane;nucleus	protein binding;RNA binding	Pf04774	1.008	0.963	0.985	36810000	37320000	36880000	37090000	35930000	36330000		0.985046	0.242191	3547.13	0	611.111	29
FALSE	High	Master Protein	P49327	Fatty acid synthase OS=Homo sapiens GN=FASN PE=1 SV=3	0	864.228	46.0374	94	471	93	1	2511	273.254	6.44		2194	FASN	ENSG00000169710.8	17	cell differentiation;metabolic process;regulation of biological process;response to stimulus	cytoplasm;cytosol;Golgi;membrane;mitochondrion	catalytic activity;nucleotide binding;protein binding;RNA binding	Pf00106, Pf00107, Pf00108, Pf00109, Pf00698, Pf00975, Pf02801, Pf08242, Pf08659, Pf13602, Pf14765	0.973	1.005	1.006	36700000	36430000	36000000	35720000	36620000	36230000		0.994869	0.604367	42.217	1	1513.79	94
FALSE	High	Master Protein	P00761 SWISS-PROT:P00761	Trypsin - Sus scrofa (Pig).	0	64.3521	36.3636	7	42	6	1	231	24.394	7.18										0.914	0.938	1.022	36220000	34540000	33230000	33120000	32420000	33980000		0.957015	0.223875	16.013	0	128.302	7
FALSE	High	Master Protein	P63244	Receptor of activated protein C kinase 1 OS=Homo sapiens GN=RACK1 PE=1 SV=3	0	257.974	70.6625	20	219	20	1	317	35.055	7.69		10399	GNB2L1; RACK1	ENSG00000204628.11	5	cell death;cell differentiation;cellular homeostasis;development;metabolic process;regulation of biological process;response to stimulus	cytoplasm;cytosol;membrane;mitochondrion;nucleus;ribosome	enzyme regulator activity;protein binding;RNA binding;structural molecule activity	Pf00400	0.981	1.026	0.996	35470000	35320000	35020000	34780000	36250000	34880000		1.00095	0.951435	1121.02	0	597.5	20
FALSE	High	Master Protein	P14625	Endoplasmin OS=Homo sapiens GN=HSP90B1 PE=1 SV=1	0	338.976	53.9228	46	316	35	1	803	92.411	4.84		7184	HSP90B1	ENSG00000166598.14	12	cell organization and biogenesis;metabolic process;regulation of biological process;response to stimulus;transport	cytosol;endoplasmic reticulum;extracellular;membrane;nucleus;organelle lumen	metal ion binding;nucleotide binding;protein binding;RNA binding	Pf00183, Pf02518, Pf13589	1.005	0.982	1.005	35240000	35440000	35330000	35430000	34790000	35510000		0.997359	0.725781	192.07	8	901.345	46
FALSE	High	Master Protein	P62269	40S ribosomal protein S18 OS=Homo sapiens GN=RPS18 PE=1 SV=3	0	79.9534	56.5789	17	83	17	1	152	17.708	10.99		6222	RPS18	ENSG00000223367.6; ENSG00000096150.9; ENSG00000235650.6; ENSG00000226225.6; ENSG00000231500.6	6; CHR_HSCHR6_MHC_DBB_CTG1; CHR_HSCHR6_MHC_QBL_CTG1; CHR_HSCHR6_MHC_COX_CTG1; CHR_HSCHR6_MHC_MCF_CTG1	cell organization and biogenesis;metabolic process;transport	cytoplasm;cytosol;membrane;nucleus;ribosome	protein binding;RNA binding;structural molecule activity	Pf00416	0.995	1.046	0.972	34870000	33120000	34820000	34700000	34640000	33840000		1.0036	0.85964	1290.55	0	251.01	17
FALSE	High	Master Protein	P62241	40S ribosomal protein S8 OS=Homo sapiens GN=RPS8 PE=1 SV=2	0	129.926	59.1346	13	172	13	1	208	24.19	10.32		6202	RPS8	ENSG00000142937.11	1	cell organization and biogenesis;metabolic process;transport	cytoplasm;cytosol;endoplasmic reticulum;membrane;nucleus;ribosome	protein binding;RNA binding;structural molecule activity	Pf01201	0.934	0.936	0.964	34140000	34070000	33910000	31880000	31880000	32690000		0.944477	0.0152832	3161.28	0	425.522	13
FALSE	High	Master Protein	P42766	60S ribosomal protein L35 OS=Homo sapiens GN=RPL35 PE=1 SV=2	0	33.9249	36.5854	5	22	5	1	123	14.543	11.05		11224	RPL35	ENSG00000136942.14	9	cell organization and biogenesis;metabolic process;transport	cytosol;membrane;ribosome	RNA binding;structural molecule activity	Pf00831	1.038	0.966	0.971	34010000	33300000	33900000	35300000	32150000	32920000		0.9917	0.798321	561.341	0	48.8366	5
FALSE	High	Master Protein	P30101	Protein disulfide-isomerase A3 OS=Homo sapiens GN=PDIA3 PE=1 SV=4	0	250.973	52.8713	31	155	25	1	505	56.747	6.35		2923	PDIA3	ENSG00000167004.12	15	cellular homeostasis;metabolic process;regulation of biological process;response to stimulus;transport	cell surface;endoplasmic reticulum;membrane;nucleus;organelle lumen	catalytic activity;protein binding;RNA binding	Pf00085, Pf13098, Pf13848, Pf13899, Pf13905	0.998	0.989	1.017	33910000	32580000	32880000	33830000	32220000	33440000		1.00121	0.952546	267.27	5	472.175	31
FALSE	High	Master Protein	P38159	RNA-binding motif protein, X chromosome OS=Homo sapiens GN=RBMX PE=1 SV=3	0	152.014	54.4757	25	132	9	1	391	42.306	10.05		27316	RBMX	ENSG00000147274.14	X	cell differentiation;cell organization and biogenesis;metabolic process;regulation of biological process;response to stimulus	membrane;nucleus;spliceosomal complex	DNA binding;nucleotide binding;protein binding;RNA binding	Pf00076, Pf08081, Pf13893, Pf14259	0.957	0.97	0.958	33890000	33070000	33100000	32430000	32070000	31710000		0.961523	0.0217071	57.78	20	361.396	25
FALSE	High	Master Protein	P49368	T-complex protein 1 subunit gamma OS=Homo sapiens GN=CCT3 PE=1 SV=4	0	435.215	66.2385	44	237	36	1	545	60.495	6.49		7203	CCT3	ENSG00000163468.14	1	cell organization and biogenesis;metabolic process;regulation of biological process;transport	cytoplasm;cytoskeleton;cytosol;membrane	nucleotide binding;protein binding;RNA binding	Pf00118	0.971	0.973	0.975	33660000	33290000	33840000	32690000	32370000	33000000		0.972914	0.0206555	1909.95	10	743.73	44
FALSE	High	Master Protein	P25705	ATP synthase subunit alpha, mitochondrial OS=Homo sapiens GN=ATP5A1 PE=1 SV=1	0	207.934	48.2821	25	269	23	1	553	59.714	9.13		498	ATP5A1	ENSG00000152234.15	18	cell organization and biogenesis;metabolic process;regulation of biological process;transport	membrane;mitochondrion;organelle lumen	catalytic activity;nucleotide binding;protein binding;RNA binding;transporter activity	Pf00006, Pf00306, Pf02663, Pf02874, Pf05943	0.949	1.004	0.995	32670000	31800000	32160000	31000000	31920000	31990000		0.9822	0.235035	48.77	1	710.606	25
FALSE	High	Master Protein	A0A0A0MTS2	Glucose-6-phosphate isomerase (Fragment) OS=Homo sapiens GN=GPI PE=1 SV=1	0	274.691	44.1536	23	165	21	1	573	64.784	9.04				ENSG00000105220.14	19	metabolic process	cytosol;membrane	catalytic activity	Pf00342	0.975	1.01	0.993	32640000	32410000	32180000	31830000	32720000	31950000		0.992492	0.490772	279.722	1	542.852	23
FALSE	High	Master Protein	P53396	ATP-citrate synthase OS=Homo sapiens GN=ACLY PE=1 SV=3	0	419.537	49.8638	52	276	52	1	1101	120.762	7.33		47	ACLY	ENSG00000131473.16	17	metabolic process;regulation of biological process;transport	cytoplasm;cytosol;extracellular;membrane;organelle lumen	catalytic activity;metal ion binding;nucleotide binding;protein binding	Pf00285, Pf00549, Pf02629, Pf08442	0.976	0.994	0.985	32530000	32180000	32620000	31750000	31980000	32130000		0.984897	0.0499329	63.495	0	835.869	52
FALSE	High	Master Protein	Q9NR30	Nucleolar RNA helicase 2 OS=Homo sapiens GN=DDX21 PE=1 SV=5	0	421.885	57.4713	50	199	47	1	783	87.29	9.28		9188	DDX21	ENSG00000165732.12	10	cell differentiation;metabolic process;regulation of biological process;response to stimulus	membrane;nucleus	catalytic activity;nucleotide binding;protein binding;RNA binding	Pf00270, Pf00271, Pf08152, Pf14617	0.961	1.006	0.969	31980000	30690000	31520000	30750000	30870000	30530000		0.978342	0.208155	343.021	4	661.249	50
FALSE	High	Master Protein	P35232	Prohibitin OS=Homo sapiens GN=PHB PE=1 SV=1	0	117.99	65.8088	19	84	19	1	272	29.786	5.76		5245	PHB	ENSG00000167085.11	17	cell differentiation;cell organization and biogenesis;metabolic process;regulation of biological process;response to stimulus;transport	cell surface;cytoplasm;endosome;membrane;mitochondrion;nucleus	DNA binding;protein binding	Pf01145	0.982	0.974	0.999	31710000	32410000	32320000	31140000	31570000	32300000		0.985172	0.313018	75.27	0	261.043	19
FALSE	High	Master Protein	P49411	Elongation factor Tu, mitochondrial OS=Homo sapiens GN=TUFM PE=1 SV=2	0	262.431	67.2566	26	145	26	1	452	49.51	7.61		7284	TUFM		16	metabolic process;response to stimulus	membrane;mitochondrion	catalytic activity;nucleotide binding;protein binding;RNA binding	Pf00009, Pf03143, Pf03144	0.947	0.997	0.96	31700000	31100000	31040000	30020000	31010000	29810000		0.968031	0.0956611	91.841	0	472.863	26
FALSE	High	Master Protein	P12956	X-ray repair cross-complementing protein 6 OS=Homo sapiens GN=XRCC6 PE=1 SV=2	0	327.12	51.8883	35	209	35	1	609	69.799	6.64		2547	XRCC6	ENSG00000196419.12	22	cell organization and biogenesis;metabolic process;regulation of biological process;response to stimulus;transport	chromosome;cytoplasm;cytosol;extracellular;membrane;nucleus;organelle lumen	catalytic activity;DNA binding;nucleotide binding;protein binding;RNA binding	Pf02037, Pf02735, Pf03730, Pf03731	1.014	0.98	0.95	31640000	32620000	32810000	32090000	31960000	31170000		0.980942	0.256815	402.702	0	695.287	35
FALSE	High	Master Protein	P40227	T-complex protein 1 subunit zeta OS=Homo sapiens GN=CCT6A PE=1 SV=3	0	225.651	52.354	26	243	26	1	531	57.988	6.68		908	CCT6A	ENSG00000146731.10	7	metabolic process;regulation of biological process	cytoplasm;cytosol;membrane	nucleotide binding;protein binding;RNA binding	Pf00118, Pf05504	0.963	0.957	0.98	31480000	30670000	29950000	30330000	29350000	29350000		0.966667	0.142193	91.106	0	637.681	26
FALSE	High	Master Protein	A0A087WVQ6	Clathrin heavy chain OS=Homo sapiens GN=CLTC PE=1 SV=1	0	694.842	45.3842	71	367	54	1	1679	191.936	5.69		1213	CLTC	ENSG00000141367.11	17	cell differentiation;cell division;cell organization and biogenesis;cellular component movement;metabolic process;regulation of biological process;response to stimulus;transport	cytosol;endosome;membrane;mitochondrion;vacuole	protein binding;RNA binding;structural molecule activity	Pf00637, Pf01394, Pf04053, Pf09268, Pf13838	0.98	1.024	0.993	31360000	30670000	31460000	30730000	31420000	31230000		0.998823	0.915144	62.096	17	1246.5	71
FALSE	High	Master Protein	P62917	60S ribosomal protein L8 OS=Homo sapiens GN=RPL8 PE=1 SV=2	0	92.7151	50.9728	12	57	12	1	257	28.007	11.03		6132	RPL8	ENSG00000161016.17	8	cell organization and biogenesis;metabolic process;response to stimulus;transport	cytoplasm;cytosol;membrane;ribosome	RNA binding;structural molecule activity	Pf00181, Pf03947	1.017	0.957	0.964	31020000	32710000	32250000	31540000	31310000	31080000		0.978641	0.30677	150.991	0	172.271	12
FALSE	High	Master Protein	P13010	X-ray repair cross-complementing protein 5 OS=Homo sapiens GN=XRCC5 PE=1 SV=3	0	251.577	43.0328	35	141	35	1	732	82.652	5.81		7520	XRCC5	ENSG00000079246.15	2	cell differentiation;cell organization and biogenesis;cell proliferation;metabolic process;regulation of biological process;response to stimulus;transport	chromosome;cytoplasm;cytosol;extracellular;membrane;nucleus;organelle lumen	catalytic activity;DNA binding;enzyme regulator activity;nucleotide binding;protein binding;RNA binding	Pf02735, Pf03730, Pf03731, Pf08785	0.932	0.973	0.971	30880000	30110000	30330000	28790000	29290000	29460000		0.958607	0.0149393	51.233	0	451.67	35
FALSE	High	Master Protein	P78527	DNA-dependent protein kinase catalytic subunit OS=Homo sapiens GN=PRKDC PE=1 SV=3	0	1107.92	39.8983	157	513	157	1	4128	468.788	7.12		5591	PRKDC	ENSG00000253729.7	8	cell death;cell differentiation;cell organization and biogenesis;cell proliferation;metabolic process;regulation of biological process;response to stimulus	cytosol;membrane;nucleus	catalytic activity;DNA binding;nucleotide binding;protein binding;RNA binding	Pf00454, Pf02259, Pf02260, Pf08163	0.985	0.988	0.98	30770000	30950000	30940000	30300000	30590000	30320000		0.984351	0.0173803	17.886	0	1614.43	157
FALSE	High	Master Protein	P63173	60S ribosomal protein L38 OS=Homo sapiens GN=RPL38 PE=1 SV=2	0	44.9759	50	5	38	5	1	70	8.213	10.1		6169	RPL38	ENSG00000172809.12	17	cell organization and biogenesis;metabolic process;regulation of biological process;transport	cytosol;ribosome	RNA binding;structural molecule activity	Pf01781	0.974	0.984	0.975	30680000	28990000	28870000	29880000	28520000	28140000		0.977411	0.445469	4640.59	0	113.581	5
FALSE	High	Master Protein	F8W7C6	60S ribosomal protein L10 OS=Homo sapiens GN=RPL10 PE=1 SV=2	0	88.7015	57.6687	11	74	11	1	163	18.553	9.95				ENSG00000147403.16	X	metabolic process	ribosome	protein binding;structural molecule activity	Pf00252	0.935	0.989	0.977	30360000	29150000	29110000	28400000	28820000	28450000		0.966712	0.128112	1777.28	0	184.841	11
FALSE	High	Master Protein	P06576	ATP synthase subunit beta, mitochondrial OS=Homo sapiens GN=ATP5B PE=1 SV=3	0	302.088	55.1985	23	260	12	1	529	56.525	5.4		506	ATP5B	ENSG00000110955.8	12	cell differentiation;cell organization and biogenesis;cellular homeostasis;metabolic process;regulation of biological process;transport	cell surface;membrane;mitochondrion;nucleus;organelle lumen	catalytic activity;nucleotide binding;protein binding;transporter activity	Pf00006, Pf00306, Pf02874	0.995	1.01	0.991	29700000	29710000	29240000	29550000	30010000	28990000		0.998872	0.926567	145.78	17	769.666	23
FALSE	High	Master Protein	P35579	Myosin-9 OS=Homo sapiens GN=MYH9 PE=1 SV=4	0	979.715	56.2245	124	460	102	1	1960	226.392	5.6		4627	MYH9	ENSG00000100345.20	22	cell differentiation;cell organization and biogenesis;cellular component movement;metabolic process;regulation of biological process;response to stimulus;transport	cytoplasm;cytoskeleton;cytosol;extracellular;membrane;nucleus	catalytic activity;motor activity;nucleotide binding;protein binding;RNA binding;transporter activity	Pf00063, Pf01442, Pf01496, Pf01576, Pf01765, Pf02736, Pf03962, Pf04111, Pf04156, Pf05911, Pf06637, Pf07888, Pf09731, Pf11068, Pf11559, Pf12128, Pf13094	0.99	1.004	0.982	29680000	29840000	30590000	29380000	29960000	30040000		0.991899	0.527285	246.874	20	1521.96	124
FALSE	High	Master Protein	P78371	T-complex protein 1 subunit beta OS=Homo sapiens GN=CCT2 PE=1 SV=4	0	455.834	69.9065	40	250	40	1	535	57.452	6.46		10576	CCT2	ENSG00000166226.12	12	cell organization and biogenesis;metabolic process;regulation of biological process;transport	cytoplasm;cytosol;extracellular;organelle lumen	nucleotide binding;protein binding	Pf00118	0.996	0.999	0.98	29500000	29610000	29180000	29380000	29580000	28590000		0.991619	0.512756	1332.52	0	847.617	40
FALSE	High	Master Protein	A0A087WYT3	Prostaglandin E synthase 3 OS=Homo sapiens GN=PTGES3 PE=1 SV=1	0	79.7246	50	7	54	7	1	164	19.143	4.55		10728	PTGES3	ENSG00000110958.15	12	cell organization and biogenesis;cell proliferation;metabolic process;regulation of biological process;response to stimulus	cytosol;nucleus	catalytic activity;protein binding	Pf04969	0.953	0.946	0.983	29400000	29320000	27480000	28020000	27740000	27010000		0.960209	0.202709	165.81	0	174.004	7
FALSE	High	Master Protein	M0QYS1	60S ribosomal protein L13a (Fragment) OS=Homo sapiens GN=RPL13A PE=1 SV=2	0	70.7911	35.7143	10	107	10	1	210	24.2	10.86				ENSG00000142541.16	19	metabolic process	ribosome	structural molecule activity	Pf00572	1.018	0.962	0.957	29130000	29640000	30150000	29650000	28510000	28870000		0.978745	0.23279	198.526	0	277.971	10
FALSE	High	Master Protein	Q9UQ80	Proliferation-associated protein 2G4 OS=Homo sapiens GN=PA2G4 PE=1 SV=3	0	218.277	57.6142	21	180	21	1	394	43.759	6.55		5036	PA2G4	ENSG00000170515.13	12	cell proliferation;metabolic process;regulation of biological process;transport	cytoplasm;extracellular;membrane;nucleus;organelle lumen	DNA binding;protein binding;RNA binding	Pf00557	1.044	0.995	0.972	28910000	30070000	30760000	30190000	29920000	29890000		1.0029	0.888128	245.209	0	513.736	21
FALSE	High	Master Protein	P84103	Serine/arginine-rich splicing factor 3 OS=Homo sapiens GN=SRSF3 PE=1 SV=1	0	96.3682	46.3415	11	104	10	1	164	19.318	11.65		6428	SRSF3	ENSG00000112081.16	6	metabolic process;regulation of biological process;transport	cytoplasm;nucleus	nucleotide binding;protein binding;RNA binding	Pf00076, Pf13893, Pf14259	0.965	0.996	0.938	28860000	28960000	29940000	27860000	28850000	28080000		0.966158	0.0974595	7195.86	1	264.933	11
FALSE	High	Master Protein	P18669	Phosphoglycerate mutase 1 OS=Homo sapiens GN=PGAM1 PE=1 SV=2	0	230.563	59.4488	17	214	16	1	254	28.786	7.18		5223; 643576	PGAM1; LOC643576	ENSG00000171314.8	10; 12	metabolic process;regulation of biological process;transport	cytoplasm;cytosol;extracellular;membrane;nucleus;organelle lumen	catalytic activity;protein binding	Pf00300	1.041	0.967	0.981	28670000	29940000	30150000	29830000	28950000	29570000		0.995381	0.812731	9999	2	592.768	17
FALSE	High	Master Protein	P25398	40S ribosomal protein S12 OS=Homo sapiens GN=RPS12 PE=1 SV=3	0	106.34	54.5455	8	71	8	1	132	14.505	7.21		6206	RPS12	ENSG00000112306.7	6	cell organization and biogenesis;metabolic process;transport	cytoplasm;cytosol;membrane;ribosome	RNA binding;structural molecule activity	Pf01248	0.965	1.02	0.984	28550000	27080000	28150000	27560000	27630000	27690000		0.989258	0.565155	1929.7	0	249.73	8
FALSE	High	Master Protein	Q14204	Cytoplasmic dynein 1 heavy chain 1 OS=Homo sapiens GN=DYNC1H1 PE=1 SV=5	0	1200.05	41.9285	191	498	191	1	4646	532.072	6.4		1778	DYNC1H1	ENSG00000197102.10	14	cell organization and biogenesis;cellular component movement;regulation of biological process;transport	cytoplasm;cytoskeleton;cytosol;extracellular;membrane;organelle lumen	catalytic activity;motor activity;nucleotide binding;protein binding;RNA binding	Pf00769, Pf03028, Pf03915, Pf04156, Pf07246, Pf07728, Pf08385, Pf08393, Pf12774, Pf12775, Pf12777, Pf12780, Pf12781, Pf13173, Pf13207, Pf13401	0.982	0.989	1.001	28540000	28610000	28360000	28020000	28310000	28390000		0.990761	0.133235	17.874	0	1560.31	191
FALSE	High	Master Protein	P09211	Glutathione S-transferase P OS=Homo sapiens GN=GSTP1 PE=1 SV=2	0	223.961	61.4286	10	218	9	1	210	23.341	5.64		2950	GSTP1	ENSG00000084207.15	11	cell communication;cell proliferation;metabolic process;regulation of biological process;response to stimulus;transport	cytoplasm;cytosol;extracellular;membrane;mitochondrion;nucleus;organelle lumen	antioxidant activity;catalytic activity;enzyme regulator activity;protein binding	Pf00043, Pf02798, Pf14497	0.975	0.999	0.944	28370000	28000000	29240000	27680000	27980000	27610000		0.972667	0.159124	18737.2	2	665.856	10
FALSE	High	Master Protein	P42704	Leucine-rich PPR motif-containing protein, mitochondrial OS=Homo sapiens GN=LRPPRC PE=1 SV=3	0	529.79	53.5151	73	278	73	1	1394	157.805	6.13		10128	LRPPRC	ENSG00000138095.18	2	cellular component movement;metabolic process;regulation of biological process;transport	chromosome;cytoplasm;cytoskeleton;membrane;mitochondrion;nucleus	catalytic activity;DNA binding;protein binding;RNA binding	Pf12854, Pf13041, Pf13812	0.974	0.987	0.962	28320000	27690000	28140000	27580000	27340000	27080000		0.97445	0.0420823	47.064	0	850.757	73
FALSE	High	Master Protein	P26373	60S ribosomal protein L13 OS=Homo sapiens GN=RPL13 PE=1 SV=4	0	99.169	52.1327	12	73	12	1	211	24.247	11.65		6137	RPL13	ENSG00000167526.13	16	cell organization and biogenesis;metabolic process;transport	cytosol;membrane;nucleus;ribosome	protein binding;RNA binding;structural molecule activity	Pf01294	0.966	0.984	1.006	28230000	28650000	28080000	27280000	28190000	28260000		0.985523	0.334229	1583.89	0	180.039	12
FALSE	High	Master Protein	P63104	14-3-3 protein zeta/delta OS=Homo sapiens GN=YWHAZ PE=1 SV=1	0	168.282	64.898	19	213	13	1	245	27.728	4.79		7534	YWHAZ	ENSG00000164924.17	8	cell organization and biogenesis;metabolic process;regulation of biological process;response to stimulus;transport	cytoplasm;cytosol;membrane;mitochondrion;nucleus	catalytic activity;protein binding;RNA binding	Pf00244	1.008	0.995	0.983	27830000	28520000	29080000	28060000	28380000	28590000		0.995318	0.759003	2274.85	0	656.943	19
FALSE	High	Master Protein	P62750	60S ribosomal protein L23a OS=Homo sapiens GN=RPL23A PE=1 SV=1	0	85.7455	44.2308	11	66	11	1	156	17.684	10.45		6147	RPL23A	ENSG00000198242.13	17	cell organization and biogenesis;cell proliferation;metabolic process;transport	cytoplasm;cytosol;nucleus;ribosome	nucleotide binding;protein binding;RNA binding;structural molecule activity	Pf00276, Pf03939	0.993	0.988	0.987	27760000	27430000	27820000	27560000	27090000	27450000		0.989037	0.181219	9999	0	189.444	11
FALSE	High	Master Protein	Q9Y3C8	Ubiquitin-fold modifier-conjugating enzyme 1 OS=Homo sapiens GN=UFC1 PE=1 SV=3	0	20.6454	29.3413	6	17	6	1	167	19.446	7.4		51506	UFC1	ENSG00000143222.11	1	metabolic process;response to stimulus	cytoplasm	catalytic activity;protein binding	Pf08694	1.001	0.951	0.979	27720000	28530000	28340000	27760000	27130000	27730000		0.976711	0.110931	12.335	0	45.5944	6
FALSE	High	Master Protein	P13797	Plastin-3 OS=Homo sapiens GN=PLS3 PE=1 SV=4	0	320.489	56.3492	36	169	31	1	630	70.766	5.6		5358	PLS3	ENSG00000102024.17	X	cell organization and biogenesis	cytoplasm;cytosol;membrane	metal ion binding;protein binding	Pf00036, Pf00307, Pf13499	0.973	0.994	0.97	27690000	26890000	27440000	26960000	26720000	26610000		0.978908	0.119856	157.489	7	538.447	36
FALSE	High	Master Protein	Q9Y2S6	Translation machinery-associated protein 7 OS=Homo sapiens GN=TMA7 PE=1 SV=1	0.000527218	8.60726	29.6875	2	5	2	1	64	7.062	9.99		51372	TMA7	ENSG00000232112.3	3					0.926	0.97	0.94	27680000	27440000	26600000	25620000	26600000	24990000		0.944812	0.0652096	99	0	10.6725	2
FALSE	High	Master Protein	A0A0U1RRM4	Polypyrimidine tract-binding protein 1 OS=Homo sapiens GN=PTBP1 PE=1 SV=1	0	195.572	36.3946	15	123	10	1	588	62.425	9.1				ENSG00000011304.19	19	metabolic process	nucleus	nucleotide binding;RNA binding	Pf00076, Pf13893, Pf14259	0.968	0.962	0.955	27560000	27230000	27360000	26670000	26190000	26120000		0.961412	0.0115215	67.129	8	420.535	15
FALSE	High	Master Protein	J3KQN4	60S ribosomal protein L36a OS=Homo sapiens GN=RPL36A PE=3 SV=1	0	31.0587	33.8028	7	21	2	1	142	16.368	10.43		6173	RPL36A	ENSG00000241343.9	X	cell organization and biogenesis;metabolic process;transport	cytosol;membrane;ribosome	protein binding;RNA binding;structural molecule activity	Pf00935	0.975	0.987	0.961	27430000	27450000	28300000	26750000	27100000	27190000		0.974273	0.114721	50.795	4	51.8767	7
FALSE	High	Master Protein	P18077	60S ribosomal protein L35a OS=Homo sapiens GN=RPL35A PE=1 SV=2	0	35.7882	47.2727	7	26	7	1	110	12.53	11.06		6165	RPL35A	ENSG00000182899.14	3	cell organization and biogenesis;metabolic process;transport	cytosol;membrane;mitochondrion;ribosome	protein binding;RNA binding;structural molecule activity	Pf01247	1	0.992	1.004	27410000	26880000	27390000	27410000	26660000	27490000		0.998531	0.906338	137.95	0	68.242	7
FALSE	High	Master Protein	P46777	60S ribosomal protein L5 OS=Homo sapiens GN=RPL5 PE=1 SV=3	0	163.193	47.8114	19	115	19	1	297	34.341	9.72		6125	RPL5	ENSG00000122406.12	1	cell organization and biogenesis;metabolic process;regulation of biological process;transport	cytoplasm;cytosol;membrane;nucleus;ribosome	protein binding;RNA binding;structural molecule activity	Pf00861, Pf14204	0.98	0.98	0.997	27270000	27430000	27950000	26720000	26870000	27880000		0.985723	0.413147	21543.3	0	300.825	19
FALSE	High	Master Protein	P62829	60S ribosomal protein L23 OS=Homo sapiens GN=RPL23 PE=1 SV=1	0	102.555	52.8571	8	77	8	1	140	14.856	10.51		9349	RPL23	ENSG00000125691.12	17	cell organization and biogenesis;metabolic process;regulation of biological process;response to stimulus;transport	cytoplasm;cytosol;membrane;ribosome	protein binding;RNA binding;structural molecule activity	Pf00238	0.965	0.979	0.991	27260000	26590000	27000000	26290000	26030000	26760000		0.978108	0.111554	358.381	0	251.215	8
FALSE	High	Master Protein	P27797	Calreticulin OS=Homo sapiens GN=CALR PE=1 SV=1	0	175.202	47.7218	20	101	20	1	417	48.112	4.44		811	CALR	ENSG00000179218.13	19	cell differentiation;cell organization and biogenesis;cellular homeostasis;metabolic process;regulation of biological process;response to stimulus;transport	cell surface;cytoplasm;cytosol;endoplasmic reticulum;extracellular;Golgi;membrane;nucleus;organelle lumen	DNA binding;metal ion binding;protein binding;RNA binding	Pf00262	0.999	1.092	0.993	27200000	25580000	27440000	27180000	27930000	27260000		1.0268	0.348204	137.95	0	317.793	20
FALSE	High	Master Protein	Q15366	Poly(rC)-binding protein 2 OS=Homo sapiens GN=PCBP2 PE=1 SV=1	0	184.673	64.3836	16	119	1	1	365	38.556	6.79		5094	PCBP2	ENSG00000197111.15	12	defense response;metabolic process;regulation of biological process;response to stimulus	cytoplasm;cytosol;membrane;nucleus	DNA binding;protein binding;RNA binding	Pf00013, Pf13014	0.996	0.996	1.027	27140000	27340000	26900000	27020000	27220000	27620000		1.0059	0.506484	277.256	21	373.432	16
FALSE	High	Master Protein	Q15181	Inorganic pyrophosphatase OS=Homo sapiens GN=PPA1 PE=1 SV=2	0	219.462	69.8962	18	111	17	1	289	32.639	5.86		5464	PPA1	ENSG00000180817.11	10	metabolic process	cytoplasm;cytosol	catalytic activity;metal ion binding	Pf00719	0.95	0.981	0.981	27080000	26350000	25850000	25740000	25850000	25370000		0.970737	0.150756	598.484	2	358.49	18
FALSE	High	Master Protein	P17987	T-complex protein 1 subunit alpha OS=Homo sapiens GN=TCP1 PE=1 SV=1	0	294.001	61.1511	32	195	32	1	556	60.306	6.11		6950	TCP1	ENSG00000120438.11	6	cell organization and biogenesis;metabolic process;regulation of biological process;transport	cytoplasm;cytoskeleton;cytosol;Golgi	nucleotide binding;protein binding;RNA binding	Pf00118	0.992	0.997	0.986	26900000	26780000	26730000	26680000	26690000	26350000		0.991419	0.164357	236.137	0	592.227	32
FALSE	High	Master Protein	P09429	High mobility group protein B1 OS=Homo sapiens GN=HMGB1 PE=1 SV=3	0	151.182	41.3953	17	106	16	1	215	24.878	5.74		3146	HMGB1	ENSG00000189403.14	13	cell differentiation;cell organization and biogenesis;cell proliferation;cellular component movement;cellular homeostasis;defense response;metabolic process;regulation of biological process;response to stimulus;transport	cell surface;chromosome;cytoplasm;endosome;extracellular;membrane;nucleus;organelle lumen	catalytic activity;DNA binding;enzyme regulator activity;protein binding;RNA binding	Pf00505, Pf09011	0.992	0.939	0.94	26840000	27240000	26740000	26640000	25590000	25130000		0.957189	0.110984	372758	1	299.712	17
FALSE	High	Master Protein	Q92688	Acidic leucine-rich nuclear phosphoprotein 32 family member B OS=Homo sapiens GN=ANP32B PE=1 SV=1	0	116.092	32.2709	12	105	6	1	251	28.77	4.06		10541	ANP32B	ENSG00000136938.8	9	cell organization and biogenesis;metabolic process;regulation of biological process	cytoplasm;nucleus	protein binding	Pf12799, Pf13855, Pf14580	0.972	0.975	0.976	26610000	26150000	26420000	25870000	25480000	25790000		0.974236	0.0195012	2781.56	7	317.361	12
FALSE	High	Master Protein	P52272	Heterogeneous nuclear ribonucleoprotein M OS=Homo sapiens GN=HNRNPM PE=1 SV=3	0	414.295	63.0137	45	282	25	1	730	77.464	8.7		4670	HNRNPM	ENSG00000099783.11	19	metabolic process;regulation of biological process;response to stimulus	membrane;nucleus;spliceosomal complex	nucleotide binding;protein binding;RNA binding	Pf00076, Pf11532, Pf11608, Pf13893, Pf14259	0.974	1.014	0.973	26510000	26170000	26630000	25810000	26540000	25920000		0.986887	0.27567	211.095	29	770.953	45
FALSE	High	Master Protein	P39023	60S ribosomal protein L3 OS=Homo sapiens GN=RPL3 PE=1 SV=2	0	208.664	50.1241	25	136	25	1	403	46.08	10.18		6122	RPL3	ENSG00000100316.15	22	cell organization and biogenesis;metabolic process;response to stimulus;transport	cytoplasm;cytosol;nucleus;ribosome	protein binding;RNA binding;structural molecule activity	Pf00297	1.017	1.025	0.981	26180000	26960000	27370000	26620000	27640000	26830000		1.0072	0.700653	629.957	0	404.495	25
FALSE	High	Master Protein	O43390	Heterogeneous nuclear ribonucleoprotein R OS=Homo sapiens GN=HNRNPR PE=1 SV=1	0	218.22	49.921	30	153	21	1	633	70.899	8.13		10236	HNRNPR	ENSG00000282958.1; ENSG00000125944.18	1; CHR_HSCHR1_4_CTG3	metabolic process;regulation of biological process	cytoplasm;endoplasmic reticulum;nucleus;spliceosomal complex	nucleotide binding;protein binding;RNA binding	Pf00076, Pf13893, Pf14259	0.999	0.955	1.005	26000000	26530000	25450000	25970000	25340000	25570000		0.985894	0.380684	44.409	8	412.64	30
FALSE	High	Master Protein	P14866	Heterogeneous nuclear ribonucleoprotein L OS=Homo sapiens GN=HNRNPL PE=1 SV=2	0	374.747	55.6876	29	207	24	1	589	64.092	8.22		3191	HNRNPL	ENSG00000282947.1; ENSG00000104824.16	19; CHR_HG26_PATCH	cell communication;metabolic process;regulation of biological process;response to stimulus	cytoplasm;cytosol;membrane;nucleus	DNA binding;nucleotide binding;protein binding;RNA binding	Pf00076, Pf13893, Pf14259	1.006	0.962	0.975	25860000	26210000	26190000	26020000	25210000	25530000		0.980833	0.15555	1530.74	5	643.775	29
FALSE	High	Master Protein	Q08211	ATP-dependent RNA helicase A OS=Homo sapiens GN=DHX9 PE=1 SV=4	0	439.249	48.0315	52	258	52	1	1270	140.869	6.84		1660	DHX9	ENSG00000135829.16	1	cell differentiation;metabolic process;regulation of biological process	cytoplasm;cytosol;membrane;nucleus	catalytic activity;DNA binding;nucleotide binding;protein binding;RNA binding	Pf00035, Pf00270, Pf00271, Pf04408, Pf07717	0.984	1.007	1.002	25740000	25340000	25290000	25340000	25520000	25330000		0.997643	0.727238	47.592	0	800.575	52
FALSE	High	Master Protein	P62906	60S ribosomal protein L10a OS=Homo sapiens GN=RPL10A PE=1 SV=2	0	118.155	45.6221	12	79	12	1	217	24.816	9.94		4736	RPL10A	ENSG00000198755.10	6	cell organization and biogenesis;metabolic process;response to stimulus;transport	cytosol;membrane;nucleus;ribosome	protein binding;RNA binding;structural molecule activity	Pf00687	1.001	1.008	0.992	25310000	25910000	26360000	25330000	26100000	26160000		1.00013	0.993831	656.933	0	236.553	12
FALSE	High	Master Protein	Q92804	TATA-binding protein-associated factor 2N OS=Homo sapiens GN=TAF15 PE=1 SV=1	0	105.261	34.4595	12	87	10	1	592	61.793	8.02		8148	TAF15	ENSG00000270647.5; ENSG00000276833.2	17; CHR_HSCHR17_7_CTG4	regulation of biological process	cytoplasm;nucleus	DNA binding;metal ion binding;nucleotide binding;protein binding;RNA binding	Pf00076, Pf00641, Pf13893, Pf14259	0.945	0.948	0.968	25290000	24500000	23900000	23890000	23220000	23130000		0.953182	0.0844975	7.003	2	198.268	12
FALSE	High	Master Protein	P50395	Rab GDP dissociation inhibitor beta OS=Homo sapiens GN=GDI2 PE=1 SV=2	0	240.532	68.0899	30	144	22	1	445	50.631	6.47		2665	GDI2	ENSG00000057608.16	10	cell organization and biogenesis;metabolic process;regulation of biological process;response to stimulus;transport	cytoplasm;cytosol;extracellular;Golgi;membrane;organelle lumen	catalytic activity;enzyme regulator activity;protein binding;RNA binding	Pf00996	0.989	0.965	0.964	25250000	25800000	25740000	24970000	24910000	24820000		0.972783	0.0499093	165.81	12	450.026	30
FALSE	High	Master Protein	P23526	Adenosylhomocysteinase OS=Homo sapiens GN=AHCY PE=1 SV=4	0	182.024	49.7685	24	123	22	1	432	47.685	6.34		191	AHCY	ENSG00000101444.12	20	defense response;metabolic process;response to stimulus;transport	cytoplasm;cytosol;nucleus	catalytic activity;nucleotide binding;protein binding	Pf00670, Pf02254, Pf02826, Pf05221	0.953	0.985	0.939	25250000	24320000	24970000	24060000	23960000	23430000		0.958546	0.0435817	119.226	2	324.68	24
FALSE	High	Master Protein	Q9UII2	ATPase inhibitor, mitochondrial OS=Homo sapiens GN=ATPIF1 PE=1 SV=1	0	62.15	37.7358	8	21	8	1	106	12.241	9.35		93974	ATPIF1	ENSG00000130770.17	1	cell differentiation;cell organization and biogenesis;metabolic process;regulation of biological process	cell surface;mitochondrion	catalytic activity;enzyme regulator activity;protein binding	Pf04568	1.024	0.904	1.025	25190000	27200000	25750000	25800000	24590000	26390000		0.982595	0.601474	50.795	0	63.8261	8
FALSE	High	Master Protein	P08579	U2 small nuclear ribonucleoprotein B'' OS=Homo sapiens GN=SNRPB2 PE=1 SV=1	0	29.7453	31.1111	7	16	5	1	225	25.47	9.72		6629	SNRPB2	ENSG00000125870.10	20	metabolic process	nucleus;spliceosomal complex	nucleotide binding;protein binding;RNA binding	Pf00076, Pf13893, Pf14259	0.951	0.955	0.943	25180000	24630000	24500000	23940000	23530000	23100000		0.94967	0.018321	9	2	52.4899	7
FALSE	High	Master Protein	Q15233	Non-POU domain-containing octamer-binding protein OS=Homo sapiens GN=NONO PE=1 SV=4	0	233.326	43.3121	25	253	23	1	471	54.197	8.95		4841	NONO	ENSG00000147140.15	X	metabolic process;regulation of biological process;response to stimulus	membrane;nucleus	DNA binding;nucleotide binding;protein binding;RNA binding	Pf00076, Pf08075, Pf13893, Pf14259	0.997	0.97	0.984	25160000	25990000	25860000	25090000	25220000	25450000		0.983768	0.242902	999	1	767.822	25
FALSE	High	Master Protein	P11940	Polyadenylate-binding protein 1 OS=Homo sapiens GN=PABPC1 PE=1 SV=2	0	287.206	57.5472	35	169	11	1	636	70.626	9.5		26986	PABPC1	ENSG00000070756.15	8	metabolic process;regulation of biological process	cytoplasm;cytosol;membrane;nucleus;spliceosomal complex	nucleotide binding;protein binding;RNA binding;translation regulator activity	Pf00076, Pf00658, Pf13893, Pf14259	1.013	0.984	1.004	25030000	25010000	24810000	25360000	24610000	24920000		1.00053	0.957979	230.013	30	462.099	35
FALSE	High	Master Protein	P62424	60S ribosomal protein L7a OS=Homo sapiens GN=RPL7A PE=1 SV=2	0	216.906	45.4887	20	128	20	1	266	29.977	10.61		6130	RPL7A	ENSG00000280858.2; ENSG00000148303.16	9; CHR_HG2030_PATCH	cell organization and biogenesis;metabolic process;transport	cytoplasm;cytosol;membrane;nucleus;ribosome	protein binding;RNA binding;structural molecule activity	Pf01248	0.979	1.022	0.99	24780000	24600000	24990000	24250000	25140000	24750000		0.996907	0.80434	501186	0	421.327	20
FALSE	High	Master Protein	P34932	Heat shock 70 kDa protein 4 OS=Homo sapiens GN=HSPA4 PE=1 SV=4	0	525.365	67.2619	54	278	52	1	840	94.271	5.19		3308	HSPA4	ENSG00000170606.14	5	cell organization and biogenesis;response to stimulus;transport	cytoplasm;cytosol	nucleotide binding;protein binding	Pf00012, Pf06723	0.986	0.976	0.968	24660000	25000000	24850000	24320000	24400000	24050000		0.976647	0.0161271	463.159	2	875.493	54
FALSE	High	Master Protein	P08758	Annexin A5 OS=Homo sapiens GN=ANXA5 PE=1 SV=2	0	81.9625	48.4375	17	65	16	1	320	35.914	5.05		308	ANXA5	ENSG00000164111.14	4	coagulation;regulation of biological process;response to stimulus;transport	cytoplasm;cytosol;extracellular;membrane	enzyme regulator activity;metal ion binding;protein binding	Pf00191	0.964	0.958	0.977	24640000	24590000	25070000	23750000	23550000	24500000		0.966353	0.0831141	12.689	1	182.959	17
FALSE	High	Master Protein	P55072	Transitional endoplasmic reticulum ATPase OS=Homo sapiens GN=VCP PE=1 SV=4	0	450.727	67.1216	53	214	53	1	806	89.266	5.26		7415	VCP	ENSG00000165280.15	9	cell communication;cell organization and biogenesis;metabolic process;regulation of biological process;response to stimulus;transport	cytoplasm;cytosol;endoplasmic reticulum;extracellular;membrane;nucleus;organelle lumen;proteasome	catalytic activity;enzyme regulator activity;nucleotide binding;protein binding;RNA binding	Pf00004, Pf00910, Pf01057, Pf01078, Pf02359, Pf02933, Pf05496, Pf05673, Pf06068, Pf07724, Pf07726, Pf07728, Pf09336, Pf13191, Pf13207, Pf13401	0.995	0.968	0.996	24510000	24350000	24200000	24380000	23580000	24100000		0.986313	0.28958	358.381	0	621.625	53
FALSE	High	Master Protein	P15121	Aldose reductase OS=Homo sapiens GN=AKR1B1 PE=1 SV=3	0	95.3329	49.3671	14	63	12	1	316	35.83	6.98		231	AKR1B1	ENSG00000085662.13	7	metabolic process;regulation of biological process;response to stimulus	cytoplasm;cytosol;extracellular;vacuole	catalytic activity;protein binding	Pf00248	0.926	0.977	0.973	24460000	24580000	23900000	22650000	24010000	23260000		0.958596	0.107553	39.842	1	196.661	14
FALSE	High	Master Protein	P22234	Multifunctional protein ADE2 OS=Homo sapiens GN=PAICS PE=1 SV=3	0	177.346	44.4706	18	106	18	1	425	47.049	7.23		10606	PAICS	ENSG00000128050.8	4	metabolic process	cytoplasm;cytosol;membrane	catalytic activity;nucleotide binding;protein binding	Pf00731, Pf01259	0.987	0.984	0.992	24400000	24290000	23760000	24100000	23900000	23570000		0.987854	0.310614	110.588	0	330.997	18
FALSE	High	Master Protein	P62244	40S ribosomal protein S15a OS=Homo sapiens GN=RPS15A PE=1 SV=2	0	41.846	48.4615	7	44	2	1	130	14.83	10.13		6210	RPS15A	ENSG00000134419.15	16	cell organization and biogenesis;metabolic process;regulation of biological process;response to stimulus;transport	cytoplasm;cytosol;membrane;mitochondrion;ribosome	protein binding;RNA binding;structural molecule activity	Pf00410	0.965	0.969	0.965	24190000	23410000	23960000	23330000	22680000	23120000		0.966042	0.0563078	34.938	6	109.799	7
FALSE	High	Master Protein	P39687	Acidic leucine-rich nuclear phosphoprotein 32 family member A OS=Homo sapiens GN=ANP32A PE=1 SV=1	0	114.454	33.7349	12	113	6	1	249	28.568	4.09		8125	ANP32A	ENSG00000140350.15	15	metabolic process;regulation of biological process;response to stimulus;transport	cytoplasm;endoplasmic reticulum;nucleus	protein binding;RNA binding	Pf12799, Pf13855, Pf14580	1.017	0.986	0.938	24070000	24020000	24400000	24480000	23690000	22880000		0.980135	0.409458	1667.1	0	324.731	12
FALSE	High	Master Protein	P20674	Cytochrome c oxidase subunit 5A, mitochondrial OS=Homo sapiens GN=COX5A PE=1 SV=2	0	50.4834	38	8	29	8	1	150	16.752	6.79		9377	COX5A	ENSG00000178741.11	15	metabolic process;transport	membrane;mitochondrion	catalytic activity;metal ion binding;protein binding;transporter activity	Pf02284	0.957	0.964	0.972	24000000	23990000	24580000	22970000	23130000	23900000		0.964586	0.0776302	38.811	0	77.9652	8
FALSE	High	Master Protein	Q13838	Spliceosome RNA helicase DDX39B OS=Homo sapiens GN=DDX39B PE=1 SV=1	0	170.503	57.0093	23	128	11	1	428	48.96	5.67		7919	DDX39B	ENSG00000225859.10; ENSG00000215425.11; ENSG00000198563.13; ENSG00000235439.10; ENSG00000230624.10; ENSG00000225073.10; ENSG00000229496.10	6; CHR_HSCHR6_MHC_MANN_CTG1; CHR_HSCHR6_MHC_QBL_CTG1; CHR_HSCHR6_MHC_SSTO_CTG1; CHR_HSCHR6_MHC_DBB_CTG1; CHR_HSCHR6_MHC_COX_CTG1; CHR_HSCHR6_MHC_MCF_CTG1	cell organization and biogenesis;metabolic process;regulation of biological process;transport	cytoplasm;nucleus;spliceosomal complex	catalytic activity;nucleotide binding;protein binding;RNA binding	Pf00270, Pf00271, Pf14617	0.96	0.945	0.975	23990000	24150000	23270000	23040000	22820000	22690000		0.95995	0.0576551	109.53	11	346.053	23
FALSE	High	Master Protein	P12004	Proliferating cell nuclear antigen OS=Homo sapiens GN=PCNA PE=1 SV=1	0	140.606	69.3487	17	102	17	1	261	28.75	4.69		5111	PCNA	ENSG00000132646.10	20	cell differentiation;cell organization and biogenesis;cell proliferation;cellular homeostasis;metabolic process;regulation of biological process;response to stimulus	nucleus	catalytic activity;DNA binding;enzyme regulator activity;protein binding	Pf00705, Pf02747	1.022	1.004	1.003	23920000	24090000	24340000	24450000	24200000	24410000		1.00981	0.189533	130.113	0	344.644	17
FALSE	High	Master Protein	J3KTL2	Serine/arginine-rich-splicing factor 1 OS=Homo sapiens GN=SRSF1 PE=1 SV=1	0	85.4937	47.4308	14	165	14	1	253	28.312	10.08		6426	SRSF1	ENSG00000136450.12	17	cell differentiation;cell organization and biogenesis;metabolic process;regulation of biological process;transport	cytoplasm;nucleus;spliceosomal complex	nucleotide binding;protein binding;RNA binding	Pf00076, Pf13893, Pf14259	0.992	0.991	0.962	23890000	24160000	24560000	23690000	23950000	23620000		0.981408	0.132325	42.94	0	530.167	14
FALSE	High	Master Protein	P07437	Tubulin beta chain OS=Homo sapiens GN=TUBB PE=1 SV=2	0	425.145	74.5495	26	800	5	1	444	49.639	4.89		203068	TUBB	ENSG00000232575.10; ENSG00000196230.12; ENSG00000227739.10; ENSG00000224156.10; ENSG00000235067.10; ENSG00000229684.10; ENSG00000183311.16; ENSG00000232421.10	6; CHR_HSCHR6_MHC_MANN_CTG1; CHR_HSCHR6_MHC_COX_CTG1; CHR_HSCHR6_MHC_APD_CTG1; CHR_HSCHR6_MHC_DBB_CTG1; CHR_HSCHR6_MHC_MCF_CTG1; CHR_HSCHR6_MHC_QBL_CTG1; CHR_HSCHR6_MHC_SSTO_CTG1	cell division;cell organization and biogenesis;cellular component movement;defense response;response to stimulus;transport	cytoplasm;cytoskeleton;extracellular;membrane;nucleus;organelle lumen	catalytic activity;nucleotide binding;protein binding;structural molecule activity	Pf00091, Pf03953, Pf10644	0.992	0.965	1.013	23820000	23360000	22950000	23620000	22530000	23250000		0.989591	0.583732	71967.6	2	2156.45	26
FALSE	High	Master Protein	A8MU27	Small ubiquitin-related modifier 3 OS=Homo sapiens GN=SUMO3 PE=1 SV=1	0	26.9804	17.0068	3	23	2	1	147	16.946	9.67				ENSG00000184900.15	21	metabolic process	nucleus	protein binding	Pf00240, Pf11976	1.057	0.966	0.924	23810000	25410000	25080000	25180000	24550000	23180000		0.981292	0.57889	12.335	1	78.0111	3
FALSE	High	Master Protein	P21796	Voltage-dependent anion-selective channel protein 1 OS=Homo sapiens GN=VDAC1 PE=1 SV=2	0	213.142	67.8445	17	141	16	1	283	30.754	8.54		7416	VDAC1	ENSG00000213585.10	5	cell communication;cell death;cell differentiation;defense response;metabolic process;regulation of biological process;response to stimulus;transport	membrane;mitochondrion;nucleus	protein binding;transporter activity	Pf01459	0.995	0.987	0.954	23580000	23270000	23170000	23470000	22970000	22110000		0.979006	0.342941	442.669	1	434.617	17
FALSE	High	Master Protein	P61254	60S ribosomal protein L26 OS=Homo sapiens GN=RPL26 PE=1 SV=1	0	76.2823	47.5862	12	48	3	1	145	17.248	10.55		6154	RPL26	ENSG00000161970.12	17	cell organization and biogenesis;metabolic process;regulation of biological process;response to stimulus;transport	cytoplasm;cytosol;membrane;ribosome	protein binding;RNA binding;structural molecule activity	Pf00467	0.989	0.994	0.966	23420000	23360000	23670000	23150000	23210000	22860000		0.982541	0.0472789	9999	10	133.862	12
FALSE	High	Master Protein	P29401	Transketolase OS=Homo sapiens GN=TKT PE=1 SV=3	0	243.523	47.6726	30	146	30	1	623	67.835	7.66		7086	TKT	ENSG00000163931.15	3	metabolic process;regulation of biological process	cytosol	catalytic activity;metal ion binding;protein binding	Pf00456, Pf00676, Pf02775, Pf02779, Pf02780, Pf09364	0.998	1.015	0.948	23380000	23230000	24010000	23330000	23580000	22760000		0.986548	0.405093	106.711	0	457.133	30
FALSE	High	Master Protein	Q99832	T-complex protein 1 subunit eta OS=Homo sapiens GN=CCT7 PE=1 SV=2	0	304.518	59.8527	30	178	30	1	543	59.329	7.65		10574	CCT7	ENSG00000135624.15	2	metabolic process;regulation of biological process;transport	cytoplasm;cytosol;mitochondrion	nucleotide binding;protein binding	Pf00118	0.998	0.956	0.989	23250000	22750000	22380000	23220000	21750000	22140000		0.981427	0.46155	164.482	0	579.133	30
FALSE	High	Master Protein	P15531	Nucleoside diphosphate kinase A OS=Homo sapiens GN=NME1 PE=1 SV=1	0	118.763	70.3947	10	170	1	1	152	17.138	6.19		4830	NME1	ENSG00000239672.7	17	cell differentiation;cellular homeostasis;metabolic process;regulation of biological process;response to stimulus;transport	cytoplasm;cytosol;membrane;nucleus	catalytic activity;DNA binding;metal ion binding;nucleotide binding;protein binding;RNA binding	Pf00334	0.986	1.158	0.921	23240000	21810000	25790000	22920000	25260000	23770000		1.01567	0.800617	629.957	0	446.853	10
FALSE	High	Master Protein	P11586	C-1-tetrahydrofolate synthase, cytoplasmic OS=Homo sapiens GN=MTHFD1 PE=1 SV=3	0	336.947	49.6257	44	181	39	1	935	101.495	7.3		4522	MTHFD1		14	metabolic process	cytoplasm;cytosol;membrane;mitochondrion	catalytic activity;nucleotide binding;protein binding	Pf00763, Pf01268, Pf02882	0.985	1.01	1.001	23160000	22540000	22640000	22820000	22760000	22670000		0.998683	0.891805	42.288	6	595.79	44
FALSE	High	Master Protein	P62753	40S ribosomal protein S6 OS=Homo sapiens GN=RPS6 PE=1 SV=1	0	100.197	39.759	13	72	13	1	249	28.663	10.84		6194	RPS6	ENSG00000137154.12	9	cell death;cell differentiation;cell organization and biogenesis;cell proliferation;metabolic process;regulation of biological process;response to stimulus;transport	cytosol;membrane;nucleus;ribosome	protein binding;RNA binding;structural molecule activity	Pf01092	1.013	0.998	0.988	23130000	22890000	23650000	23440000	22850000	23360000		0.999713	0.982835	1290.55	0	221.575	13
FALSE	High	Master Protein	P11021	78 kDa glucose-regulated protein OS=Homo sapiens GN=HSPA5 PE=1 SV=2	0	428.242	51.5291	41	348	38	1	654	72.288	5.16		3309	HSPA5	ENSG00000044574.7	9	cell communication;cell death;cell differentiation;cell organization and biogenesis;metabolic process;regulation of biological process;response to stimulus;transport	cell surface;cytoplasm;endoplasmic reticulum;membrane;mitochondrion;nucleus;organelle lumen	catalytic activity;metal ion binding;nucleotide binding;protein binding	Pf00012, Pf01968, Pf06723	1	0.971	0.968	23090000	23250000	23250000	23090000	22580000	22510000		0.979738	0.114185	1310.13	0	1059.64	41
FALSE	High	Master Protein	P20700	Lamin-B1 OS=Homo sapiens GN=LMNB1 PE=1 SV=2	0	346.486	65.0171	44	191	40	1	586	66.368	5.16		4001	LMNB1	ENSG00000113368.11	5	regulation of biological process	membrane;nucleus	catalytic activity;motor activity;protein binding;structural molecule activity	Pf00038, Pf00932, Pf01576, Pf07888, Pf09726, Pf09731, Pf10186, Pf12128	1.021	0.998	0.98	23080000	23040000	23680000	23560000	22980000	23200000		0.99914	0.944074	382.119	3	586.919	44
FALSE	High	Master Protein	P43487	Ran-specific GTPase-activating protein OS=Homo sapiens GN=RANBP1 PE=1 SV=1	0	106.918	67.1642	11	75	10	1	201	23.296	5.29		5902	RANBP1	ENSG00000099901.16	22	cell organization and biogenesis;metabolic process;regulation of biological process;response to stimulus;transport	cytoplasm;cytosol;nucleus	enzyme regulator activity;protein binding	Pf00638	0.966	1.001	0.995	22680000	22650000	23010000	21900000	22670000	22890000		0.987123	0.438703	13894	1	221.616	11
FALSE	High	Master Protein	P37802	Transgelin-2 OS=Homo sapiens GN=TAGLN2 PE=1 SV=3	0	153.43	79.397	16	125	16	1	199	22.377	8.25		8407	TAGLN2	ENSG00000158710.14	1	cell differentiation;transport	cytosol;extracellular	protein binding	Pf00307, Pf00402	0.995	0.982	1.021	22450000	22680000	22160000	22340000	22290000	22630000		0.999554	0.95955	999	0	372.777	16
FALSE	High	Master Protein	P0CE47	Elongation factor Tu 1 OS=Escherichia coli (strain K12) GN=tufA PE=1 SV=1	0	200.951	63.9594	20	199	20	1	394	43.256	5.45		947838	tufA; SH08_20960; SH03_20855; SH06_21160; SH04_20845; SH07_20850; SF31_21245			metabolic process;response to stimulus	cytoplasm;membrane	catalytic activity;nucleotide binding;protein binding;RNA binding	Pf00009, Pf03143, Pf03144	1.822	1.756	1.752	22320000	23250000	22540000	40650000	40820000	39480000		1.7758	1.48809e-05	73.989	0	538.493	20
FALSE	High	Master Protein	P13667	Protein disulfide-isomerase A4 OS=Homo sapiens GN=PDIA4 PE=1 SV=2	0	359.683	52.7132	40	212	40	1	645	72.887	5.07		9601	PDIA4	ENSG00000155660.10	7	cellular homeostasis;metabolic process;regulation of biological process;response to stimulus;transport	cell surface;endoplasmic reticulum;organelle lumen	catalytic activity;metal ion binding;protein binding;RNA binding	Pf00085, Pf01216, Pf13098, Pf13848, Pf13905	0.987	0.972	0.976	22190000	23020000	22790000	21890000	22380000	22250000		0.978235	0.177669	279.136	0	574.177	40
FALSE	High	Master Protein	P23246	Splicing factor, proline- and glutamine-rich OS=Homo sapiens GN=SFPQ PE=1 SV=2	0	289.018	37.1994	29	224	22	1	707	76.102	9.44		6421	SFPQ	ENSG00000116560.10	1	cell organization and biogenesis;metabolic process;regulation of biological process;response to stimulus	chromosome;cytoplasm;nucleus	DNA binding;nucleotide binding;protein binding;RNA binding	Pf00076, Pf08075, Pf13893, Pf14259	1.009	0.999	0.991	22170000	21760000	22000000	22370000	21740000	21810000		0.999848	0.989377	999	14	634.048	29
FALSE	High	Master Protein	P07814	Bifunctional glutamate/proline--tRNA ligase OS=Homo sapiens GN=EPRS PE=1 SV=5	0	606.986	52.9762	74	268	73	1	1512	170.483	7.33		2058	EPRS	ENSG00000136628.17	1	cell organization and biogenesis;metabolic process;regulation of biological process;response to stimulus	cytoplasm;cytosol;membrane	catalytic activity;nucleotide binding;protein binding;RNA binding	Pf00458, Pf00587, Pf00749, Pf01406, Pf03129, Pf03950, Pf09180, Pf14497	0.972	0.987	0.99	22090000	21780000	21780000	21470000	21500000	21560000		0.98294	0.0608703	118.653	1	856.806	74
FALSE	High	Master Protein	P40925	Malate dehydrogenase, cytoplasmic OS=Homo sapiens GN=MDH1 PE=1 SV=4	0	143.476	50.8982	18	90	18	1	334	36.403	7.36		4190	MDH1	ENSG00000014641.17	2	metabolic process	cytoplasm;cytosol;mitochondrion	catalytic activity;nucleotide binding;protein binding	Pf00056, Pf02866	0.969	1.009	0.984	22090000	21900000	22200000	21400000	22100000	21850000		0.987309	0.306248	195.842	0	290.915	18
FALSE	High	Master Protein	P61313	60S ribosomal protein L15 OS=Homo sapiens GN=RPL15 PE=1 SV=2	0	84.203	37.7451	9	61	9	1	204	24.131	11.62		6138	RPL15	ENSG00000174748.18	3	cell organization and biogenesis;metabolic process;response to stimulus;transport	cytosol;membrane;nucleus;ribosome	protein binding;RNA binding;structural molecule activity	Pf00827	1.037	1.027	0.952	22070000	20780000	22610000	22880000	21350000	21520000		1.00443	0.900774	99	0	182.585	9
FALSE	High	Master Protein	H0YKD8	60S ribosomal protein L28 OS=Homo sapiens GN=RPL28 PE=1 SV=1	0	51.267	36.4706	9	41	9	1	170	19.06	11.46		6158	RPL28	ENSG00000108107.14	19	cell organization and biogenesis;metabolic process;regulation of biological process;transport	cytosol;membrane;ribosome	protein binding;RNA binding;structural molecule activity	Pf01778	0.979	0.942	1.01	21960000	22680000	21410000	21500000	21360000	21620000		0.97623	0.288959	20.544	0	119.522	9
FALSE	High	Master Protein	P62899	60S ribosomal protein L31 OS=Homo sapiens GN=RPL31 PE=1 SV=1	0	38.7177	47.2	8	41	8	1	125	14.454	10.54		6160	RPL31	ENSG00000071082.10	2	cell organization and biogenesis;metabolic process;transport	cytosol;membrane;ribosome	protein binding;RNA binding;structural molecule activity	Pf01198	0.971	0.95	1.03	21660000	21480000	21160000	21030000	20400000	21800000		0.983359	0.478601	99	0	104.928	8
FALSE	High	Master Protein	P05388	60S acidic ribosomal protein P0 OS=Homo sapiens GN=RPLP0 PE=1 SV=1	0	128.101	47.6341	14	94	14	1	317	34.252	5.97		6175	RPLP0	ENSG00000089157.15	12	cell organization and biogenesis;metabolic process;response to stimulus;transport	cytoplasm;cytosol;endoplasmic reticulum;membrane;nucleus;ribosome	protein binding;RNA binding;structural molecule activity	Pf00428, Pf00466	0.983	0.962	0.975	21580000	21850000	22250000	21210000	21020000	21690000		0.973203	0.103028	134.936	0	314.773	14
FALSE	High	Master Protein	E7EMB3	Calmodulin OS=Homo sapiens GN=CALM2 PE=1 SV=1	0	65.935	24.4898	7	51	7	1	196	21.675	4.56				ENSG00000143933.16	2			metal ion binding;protein binding	Pf00036, Pf08726, Pf12763, Pf13202, Pf13405, Pf13499, Pf13833, Pf14658	0.977	1.005	0.997	21350000	20660000	20790000	20870000	20760000	20720000		0.992834	0.554665	27.48	0	159.176	7
FALSE	High	Master Protein	P32969	60S ribosomal protein L9 OS=Homo sapiens GN=RPL9 PE=1 SV=1	0	65.9154	36.4583	7	41	7	1	192	21.85	9.95		6133	RPL9	ENSG00000163682.15	4	cell organization and biogenesis;metabolic process;transport	cytosol;membrane;nucleus;ribosome	protein binding;RNA binding;structural molecule activity	Pf00347	0.997	0.969	0.992	21150000	21910000	21240000	21080000	21220000	21080000		0.985692	0.32842	128.155	0	115.726	7
FALSE	High	Master Protein	P45880	Voltage-dependent anion-selective channel protein 2 OS=Homo sapiens GN=VDAC2 PE=1 SV=2	0	142.205	55.4422	13	118	13	1	294	31.547	7.56		7417	VDAC2	ENSG00000165637.13	10	regulation of biological process;transport	membrane;mitochondrion;nucleus	nucleotide binding;protein binding;transporter activity	Pf01459	1.027	0.964	0.962	21100000	21810000	21720000	21670000	21030000	20900000		0.984063	0.352242	73.989	0	342.826	13
FALSE	High	Master Protein	P62979	Ubiquitin-40S ribosomal protein S27a OS=Homo sapiens GN=RPS27A PE=1 SV=2	0	99.179	67.9487	13	146	6	1	156	17.953	9.64		6233	RPS27A	ENSG00000143947.13	2	cell communication;cell organization and biogenesis;cellular homeostasis;defense response;metabolic process;regulation of biological process;response to stimulus;transport	cytoplasm;cytosol;membrane;nucleus;ribosome	metal ion binding;protein binding;RNA binding;structural molecule activity	Pf00240, Pf01599, Pf11976, Pf13019, Pf13881, Pf14560	0.971	0.959	0.987	20920000	21490000	20910000	20300000	20600000	20630000		0.971731	0.0693335	14677	5	378.339	13
FALSE	High	Master Protein	P55060	Exportin-2 OS=Homo sapiens GN=CSE1L PE=1 SV=3	0	341.723	41.0917	44	184	44	1	971	110.346	5.77		1434	CSE1L	ENSG00000124207.16	20	cell death;cell proliferation;transport	cytoplasm;cytosol;membrane;nucleus	protein binding;transporter activity	Pf03378, Pf03810, Pf08506	0.98	0.992	1.004	20910000	20640000	21400000	20490000	20470000	21500000		0.992216	0.711364	46.706	0	572.238	44
FALSE	High	Master Protein	Q01105	Protein SET OS=Homo sapiens GN=SET PE=1 SV=3	0	91.3518	36.8966	9	58	9	1	290	33.469	4.32		6418	SET	ENSG00000119335.16	9	cell organization and biogenesis;metabolic process;regulation of biological process;transport	cytoplasm;cytosol;endoplasmic reticulum;nucleus	DNA binding;enzyme regulator activity;protein binding	Pf00956	1.008	0.966	0.996	20850000	22140000	22420000	21020000	21380000	22320000		0.989451	0.730158	124.893	0	203.233	9
FALSE	High	Master Protein	Q8N257	Histone H2B type 3-B OS=Homo sapiens GN=HIST3H2BB PE=1 SV=3	0	141.568	62.6984	11	675	1	1	126	13.9	10.32		128312	HIST3H2BB	ENSG00000196890.4	1	cell organization and biogenesis	chromosome;cytosol;nucleus	DNA binding;protein binding	Pf00125, Pf00808	0.965	0.903	0.941	20840000	22360000	22000000	20120000	20200000	20690000		0.935736	0.0780005	193069	2	1758.75	11
FALSE	High	Master Protein	O75390	Citrate synthase, mitochondrial OS=Homo sapiens GN=CS PE=1 SV=2	0	80.6497	25.7511	12	89	7	1	466	51.68	8.32		1431	CS	ENSG00000062485.18	12	metabolic process	mitochondrion;nucleus;organelle lumen	catalytic activity;RNA binding	Pf00285	0.969	0.958	0.969	20650000	20650000	20720000	20000000	19780000	20080000		0.965173	0.0111354	17.738	5	244.215	12
FALSE	High	Master Protein	Q99623	Prohibitin-2 OS=Homo sapiens GN=PHB2 PE=1 SV=2	0	113.281	64.214	19	89	19	1	299	33.276	9.83		11331	PHB2	ENSG00000215021.8	12	cell organization and biogenesis;metabolic process;regulation of biological process;transport	cell surface;cytoplasm;membrane;mitochondrion;nucleus	protein binding	Pf01145	1	0.98	1.033	20630000	21020000	20590000	20620000	20600000	21260000		1.00386	0.773384	37.986	0	284.508	19
FALSE	High	Master Protein	P62891	60S ribosomal protein L39 OS=Homo sapiens GN=RPL39 PE=1 SV=2	0.00489103	3.86956	19.6078	1	5	1	1	51	6.403	12.56		6170; 285785	RPL39; RPL39P3	ENSG00000198918.7	X; 6	cell organization and biogenesis;defense response;metabolic process;response to stimulus;transport	cytosol;ribosome	RNA binding;structural molecule activity	Pf00832	0.959	1.116	0.99	20630000	21760000	21550000	19780000	24280000	21320000		1.02252	0.755091	99	0	12.553	1
FALSE	High	Master Protein	Q00325	Phosphate carrier protein, mitochondrial OS=Homo sapiens GN=SLC25A3 PE=1 SV=2	0	52.3906	25.9669	10	34	2	1	362	40.069	9.38		5250	SLC25A3	ENSG00000075415.12	12	transport	membrane;mitochondrion	protein binding;transporter activity	Pf00153	1.034	1.016	0.972	20580000	20190000	21360000	21270000	20510000	20760000		1.0066	0.75836	6.943	8	93.2038	10
FALSE	High	Master Protein	P50991	T-complex protein 1 subunit delta OS=Homo sapiens GN=CCT4 PE=1 SV=4	0	281.087	66.4193	33	201	32	1	539	57.888	7.83		10575	CCT4	ENSG00000115484.14	2	metabolic process;regulation of biological process;transport	cytoplasm;cytoskeleton;cytosol	nucleotide binding;protein binding;RNA binding	Pf00118	1.034	1.022	1.003	20460000	20940000	21400000	21170000	21400000	21470000		1.01975	0.26368	122.285	1	638.618	33
FALSE	High	Master Protein	A0A0D9SF53	ATP-dependent RNA helicase DDX3X OS=Homo sapiens GN=DDX3X PE=1 SV=1	0	291.324	54.4338	39	189	36	1	733	81.426	8.07				ENSG00000215301.9	X		cytosol;nucleus	catalytic activity;DNA binding;nucleotide binding	Pf00270, Pf00271, Pf04851	1.017	0.996	1.006	20120000	20090000	20100000	20470000	20000000	20220000		1.0063	0.449434	41.919	6	551.065	39
FALSE	High	Master Protein	Q9UMS4	Pre-mRNA-processing factor 19 OS=Homo sapiens GN=PRPF19 PE=1 SV=1	0	118.677	33.7302	14	69	14	1	504	55.146	6.61		27339	PRPF19	ENSG00000110107.8	11	cell organization and biogenesis;cell proliferation;metabolic process;regulation of biological process;response to stimulus	cytoplasm;cytoskeleton;membrane;nucleus;spliceosomal complex	catalytic activity;metal ion binding;protein binding	Pf00400, Pf04564, Pf08606, Pf11789	0.996	0.996	1.022	20050000	20120000	19720000	19970000	20050000	20150000		1.00468	0.541095	24.65	0	208.005	14
FALSE	High	Master Protein	P30048	Thioredoxin-dependent peroxide reductase, mitochondrial OS=Homo sapiens GN=PRDX3 PE=1 SV=3	0	133.985	43.3594	10	109	10	1	256	27.675	7.78		10935	PRDX3	ENSG00000165672.6	10	cell death;cell differentiation;cell organization and biogenesis;cellular homeostasis;metabolic process;regulation of biological process;response to stimulus	cytoplasm;cytosol;endosome;mitochondrion;organelle lumen	antioxidant activity;catalytic activity;enzyme regulator activity;protein binding	Pf00578, Pf08534, Pf10417, Pf13905	0.992	0.977	0.978	20030000	19390000	19150000	19870000	18940000	18730000		0.982414	0.479967	267.27	0	365.228	10
FALSE	High	Master Protein	P23284	Peptidyl-prolyl cis-trans isomerase B OS=Homo sapiens GN=PPIB PE=1 SV=2	0	122.542	57.8704	13	90	13	1	216	23.728	9.41		5479	PPIB	ENSG00000166794.4	15	metabolic process;regulation of biological process	endoplasmic reticulum;membrane;nucleus;organelle lumen	catalytic activity;protein binding;RNA binding	Pf00160	0.987	1	0.972	19840000	19720000	19960000	19580000	19710000	19410000		0.986223	0.0728002	288.427	0	265.896	13
FALSE	High	Master Protein	P61353	60S ribosomal protein L27 OS=Homo sapiens GN=RPL27 PE=1 SV=2	0	57.1807	48.5294	7	61	7	1	136	15.788	10.56		6155	RPL27	ENSG00000131469.12	17	cell organization and biogenesis;metabolic process;transport	cytosol;membrane;nucleus;ribosome	RNA binding;structural molecule activity	Pf00467, Pf01777	0.981	0.95	0.973	19790000	19950000	21060000	19410000	18950000	20490000		0.967928	0.345157	3980.07	0	155.15	7
FALSE	High	Master Protein	P12268	Inosine-5'-monophosphate dehydrogenase 2 OS=Homo sapiens GN=IMPDH2 PE=1 SV=2	0	264.953	45.1362	26	111	23	1	514	55.77	6.9		3615	IMPDH2	ENSG00000178035.11	3	cell organization and biogenesis;cell proliferation;metabolic process;response to stimulus;transport	cytoplasm;cytosol;extracellular;membrane;nucleus;organelle lumen	catalytic activity;DNA binding;metal ion binding;nucleotide binding;protein binding;RNA binding	Pf00478, Pf00571, Pf00977, Pf01070, Pf03060	0.988	0.993	0.977	19690000	19540000	19730000	19460000	19400000	19270000		0.985923	0.0264646	200.534	3	427.993	26
FALSE	High	Master Protein	P24534	Elongation factor 1-beta OS=Homo sapiens GN=EEF1B2 PE=1 SV=3	0	102.318	61.3333	11	145	8	1	225	24.748	4.67		1933	EEF1B2	ENSG00000283391.1; ENSG00000114942.13	2; CHR_HSCHR2_6_CTG7_2	metabolic process;response to stimulus	cytoplasm;cytosol;endoplasmic reticulum;nucleus	protein binding;RNA binding	Pf00736, Pf14497	0.987	0.963	0.977	19670000	19840000	19050000	19420000	19100000	18610000		0.975581	0.229385	57.78	0	418.42	11
FALSE	High	Master Protein	C9JIZ6	Prosaposin OS=Homo sapiens GN=PSAP PE=1 SV=2	0	88.4324	27.5142	15	54	15	1	527	58.402	5.17				ENSG00000197746.13	10	metabolic process	vacuole		Pf02199, Pf03489, Pf05184	0.976	1.003	0.983	19650000	19280000	19550000	19180000	19330000	19210000		0.987004	0.135642	6.943	0	154.527	15
FALSE	High	Master Protein	Q99497	Protein deglycase DJ-1 OS=Homo sapiens GN=PARK7 PE=1 SV=2	0	108.793	70.8995	14	77	14	1	189	19.878	6.79		11315	PARK7	ENSG00000116288.12	1	cell communication;cell organization and biogenesis;defense response;metabolic process;regulation of biological process;response to stimulus;transport	chromosome;cytoplasm;cytosol;endoplasmic reticulum;membrane;mitochondrion;nucleus;organelle lumen	antioxidant activity;catalytic activity;DNA binding;enzyme regulator activity;metal ion binding;protein binding;RNA binding	Pf01965, Pf13278	0.989	0.948	0.972	19650000	19510000	19290000	19430000	18500000	18740000		0.969547	0.156152	260.016	0	228.601	14
FALSE	High	Master Protein	Q02543	60S ribosomal protein L18a OS=Homo sapiens GN=RPL18A PE=1 SV=2	0	61.9335	48.2955	11	63	11	1	176	20.749	10.71		6142	RPL18A	ENSG00000105640.12	19	cell organization and biogenesis;metabolic process;response to stimulus;transport	cytosol;membrane;ribosome	protein binding;RNA binding;structural molecule activity	Pf01775	0.971	0.996	0.959	19590000	19290000	19490000	19020000	19220000	18690000		0.97533	0.0694463	214.443	0	186.948	11
FALSE	High	Master Protein	Q9Y3U8	60S ribosomal protein L36 OS=Homo sapiens GN=RPL36 PE=1 SV=3	0	38.3937	30.4762	5	32	5	1	105	12.246	11.59		25873	RPL36	ENSG00000130255.12	19	cell organization and biogenesis;metabolic process;transport	cytoplasm;cytosol;membrane;ribosome	RNA binding;structural molecule activity	Pf01158	0.99	0.986	1.003	19380000	19660000	19100000	19200000	19380000	19160000		0.99312	0.508071	21543.3	0	85.8772	5
FALSE	High	Master Protein	O14737	Programmed cell death protein 5 OS=Homo sapiens GN=PDCD5 PE=1 SV=3	0	80.4102	59.2	8	53	8	1	125	14.276	6.04		9141	PDCD5	ENSG00000105185.11	19	cell death;regulation of biological process;response to stimulus	cytoplasm;cytosol;nucleus	DNA binding;enzyme regulator activity;protein binding	Pf01984	0.925	0.935	0.967	19250000	17900000	18120000	17800000	16740000	17520000		0.941921	0.116193	157.489	0	155.175	8
FALSE	High	Master Protein	P54577	Tyrosine--tRNA ligase, cytoplasmic OS=Homo sapiens GN=YARS PE=1 SV=4	0	287.121	64.9621	39	169	39	1	528	59.106	7.05		8565	YARS	ENSG00000134684.10	1	cell death;metabolic process;regulation of biological process;response to stimulus	cytoplasm;cytosol	catalytic activity;nucleotide binding;protein binding;RNA binding;signal transducer activity	Pf00579, Pf01588	0.971	0.969	0.988	19240000	19140000	18620000	18690000	18550000	18400000		0.97614	0.128043	214.443	0	491.051	39
FALSE	High	Master Protein	P83731	60S ribosomal protein L24 OS=Homo sapiens GN=RPL24 PE=1 SV=1	0	48.1826	38.2166	7	49	7	1	157	17.768	11.25		6152	RPL24	ENSG00000114391.12	3	cell organization and biogenesis;cellular component movement;metabolic process;regulation of biological process;transport	cytoplasm;cytosol;membrane;ribosome	protein binding;RNA binding;structural molecule activity	Pf01246	1.008	1.019	0.959	19240000	19280000	20010000	19380000	19650000	19190000		0.994704	0.739393	45.416	0	150.9	7
FALSE	High	Master Protein	P11908	Ribose-phosphate pyrophosphokinase 2 OS=Homo sapiens GN=PRPS2 PE=1 SV=2	0	132.104	53.7736	15	49	6	1	318	34.747	6.61		5634	PRPS2	ENSG00000101911.12	X	metabolic process		catalytic activity;metal ion binding;nucleotide binding;protein binding	Pf00156, Pf13793, Pf14572	1.046	0.942	1.077	19090000	19550000	18450000	19960000	18410000	19860000		1.01997	0.562809	75.27	12	187.373	15
FALSE	High	Master Protein	P22102	Trifunctional purine biosynthetic protein adenosine-3 OS=Homo sapiens GN=GART PE=1 SV=1	0	376.607	44.8515	40	180	33	1	1010	107.699	6.7		2618	GART	ENSG00000159131.16	21	metabolic process;response to stimulus	cytoplasm;cytosol	catalytic activity;metal ion binding;nucleotide binding	Pf00551, Pf00586, Pf01071, Pf02222, Pf02655, Pf02769, Pf02843, Pf02844, Pf03435, Pf07478, Pf08442, Pf08443, Pf13535, Pf15632	0.978	0.989	0.973	19030000	18570000	18890000	18620000	18360000	18390000		0.980173	0.0928954	55.234	6	593.673	40
FALSE	High	Master Protein	P50502	Hsc70-interacting protein OS=Homo sapiens GN=ST13 PE=1 SV=2	0	138.099	42.8184	16	108	16	1	369	41.305	5.27		6767	ST13	ENSG00000100380.13	22	cell organization and biogenesis;metabolic process;regulation of biological process	cytoplasm;cytosol	nucleotide binding;protein binding	Pf00515, Pf13371, Pf13414, Pf13431, Pf13432	1	0.96	1.006	19030000	18710000	18830000	19030000	17960000	18950000		0.988863	0.608738	516.947	0	324.693	16
FALSE	High	Master Protein	H3BPE7	RNA-binding protein FUS OS=Homo sapiens GN=FUS PE=1 SV=1	0	124.405	22.0114	11	113	9	1	527	53.465	9.36				ENSG00000089280.18	16	regulation of biological process		metal ion binding;nucleotide binding;RNA binding	Pf00076, Pf00641, Pf13893, Pf14259	0.962	1.038	0.949	18780000	17730000	18320000	18060000	18410000	17380000		0.982127	0.488512	226.585	0	292.649	11
FALSE	High	Master Protein	Q08170	Serine/arginine-rich splicing factor 4 OS=Homo sapiens GN=SRSF4 PE=1 SV=2	0	101.561	28.9474	16	52	10	1	494	56.645	11.52		6429	SRSF4	ENSG00000116350.16	1	metabolic process;regulation of biological process;response to stimulus;transport	nucleus	nucleotide binding;protein binding;RNA binding	Pf00076, Pf13893, Pf14259	1.001	0.983	0.965	18760000	17970000	18870000	18790000	17670000	18200000		0.983094	0.507304	99	6	154.227	16
FALSE	High	Master Protein	P47914	60S ribosomal protein L29 OS=Homo sapiens GN=RPL29 PE=1 SV=2	0	19.6196	14.4654	2	17	2	1	159	17.741	11.66		6159	RPL29	ENSG00000162244.10	3	cell organization and biogenesis;metabolic process;transport	cytosol;membrane;ribosome	protein binding;RNA binding;structural molecule activity	Pf01779	0.977	0.983	0.916	18760000	18400000	20170000	18330000	18090000	18470000		0.957439	0.268864	16.783	0	61.7176	2
FALSE	High	Master Protein	P09669	Cytochrome c oxidase subunit 6C OS=Homo sapiens GN=COX6C PE=1 SV=2	0	16.5566	50.6667	5	17	5	1	75	8.776	10.39		1345	COX6C	ENSG00000164919.10	8	metabolic process;transport	membrane;mitochondrion	catalytic activity;transporter activity	Pf02937	0.984	0.999	0.974	18660000	18410000	19010000	18370000	18400000	18520000		0.985913	0.266352	55.234	0	47.9643	5
FALSE	High	Master Protein	Q92945	Far upstream element-binding protein 2 OS=Homo sapiens GN=KHSRP PE=1 SV=4	0	456.062	61.744	40	259	35	1	711	73.07	7.3		8570	KHSRP	ENSG00000088247.17	19	metabolic process;regulation of biological process;response to stimulus;transport	cytoplasm;cytosol;membrane;nucleus	DNA binding;protein binding;RNA binding	Pf00013, Pf07650, Pf09005, Pf13014	0.955	0.976	0.977	18360000	17750000	18070000	17540000	17330000	17650000		0.969361	0.0681389	606.832	3	818.158	40
FALSE	High	Master Protein	P62249	40S ribosomal protein S16 OS=Homo sapiens GN=RPS16 PE=1 SV=2	0	66.2789	62.3288	12	70	12	1	146	16.435	10.21		6217	RPS16	ENSG00000105193.8	19	cell organization and biogenesis;metabolic process;transport	cytosol;membrane;ribosome	protein binding;RNA binding;structural molecule activity	Pf00380	0.953	0.992	1.02	18340000	18210000	17590000	17470000	18070000	17940000		0.987809	0.498757	99	0	171.946	12
FALSE	High	Master Protein	P30050	60S ribosomal protein L12 OS=Homo sapiens GN=RPL12 PE=1 SV=1	0	90.8403	67.8788	11	75	11	1	165	17.808	9.42		6136	RPL12	ENSG00000197958.12	9	cell organization and biogenesis;metabolic process;transport	cytoplasm;cytosol;membrane;nucleus;ribosome	protein binding;RNA binding;structural molecule activity	Pf00298, Pf03946	0.979	1.028	0.984	18210000	17530000	18140000	17830000	18020000	17850000		0.996659	0.811038	277.256	0	224.49	11
FALSE	High	Master Protein	P21333	Filamin-A OS=Homo sapiens GN=FLNA PE=1 SV=4	0	870.969	53.5701	116	327	105	1	2647	280.564	6.06		2316	FLNA	ENSG00000196924.14	X	cell organization and biogenesis;cellular component movement;metabolic process;regulation of biological process;response to stimulus;transport	cytoplasm;cytoskeleton;cytosol;extracellular;membrane;nucleus	protein binding;RNA binding;signal transducer activity	Pf00307, Pf00630	0.991	0.965	0.986	18000000	18290000	18050000	17840000	17660000	17800000		0.980861	0.0394511	31.68	10	1116.74	116
FALSE	High	Master Protein	A0A0C4DFU2	Superoxide dismutase OS=Homo sapiens GN=SOD2 PE=1 SV=1	0	86.5376	41.8919	9	32	9	1	222	24.735	8.25		6648	SOD2	ENSG00000112096.16	6	cell differentiation;cell organization and biogenesis;metabolic process;regulation of biological process;response to stimulus	cytoplasm;membrane;mitochondrion;organelle lumen	antioxidant activity;catalytic activity;DNA binding;metal ion binding;protein binding	Pf00081, Pf02777	1.005	0.982	0.983	17950000	18060000	18180000	18050000	17730000	17860000		0.989851	0.191091	48.239	0	111.993	9
FALSE	High	Master Protein	P27348	14-3-3 protein theta OS=Homo sapiens GN=YWHAQ PE=1 SV=1	0	185.235	60.4082	19	147	12	1	245	27.747	4.78		10971	YWHAQ	ENSG00000134308.13	2	cell organization and biogenesis;regulation of biological process;response to stimulus;transport	cytoplasm;cytosol;membrane;mitochondrion	protein binding	Pf00244	0.992	0.919	0.992	17890000	18680000	18520000	17740000	17170000	18370000		0.967145	0.234347	1929.7	6	448.962	19
FALSE	High	Master Protein	P62820	Ras-related protein Rab-1A OS=Homo sapiens GN=RAB1A PE=1 SV=3	0	84.6103	52.1951	12	69	4	1	205	22.663	6.21		5861	RAB1A	ENSG00000138069.16	2	cell organization and biogenesis;cellular component movement;defense response;metabolic process;regulation of biological process;response to stimulus;transport	cytoplasm;cytosol;endoplasmic reticulum;endosome;Golgi;membrane	catalytic activity;nucleotide binding;protein binding	Pf00009, Pf00025, Pf00071, Pf01926, Pf04670, Pf08477, Pf09439	1.021	0.992	0.996	17790000	18200000	18610000	18170000	18050000	18540000		1.00293	0.859358	33.145	8	212.985	12
FALSE	High	Master Protein	Q9Y490	Talin-1 OS=Homo sapiens GN=TLN1 PE=1 SV=3	0	971.85	56.0016	112	348	98	1	2541	269.599	6.07		7094	TLN1	ENSG00000137076.20	9	cell organization and biogenesis;cellular component movement;regulation of biological process;response to stimulus;transport	cell surface;cytoplasm;cytoskeleton;cytosol;extracellular;membrane	protein binding;structural molecule activity	Pf00373, Pf01608, Pf02174, Pf08913, Pf09141, Pf09379	0.966	0.996	0.975	17760000	17360000	17730000	17160000	17300000	17290000		0.979186	0.0911813	34.424	15	1250.29	112
FALSE	High	Master Protein	A0A087X020	Ribosome maturation protein SBDS OS=Homo sapiens GN=SBDS PE=1 SV=1	0	94.8024	50.4	19	52	19	1	250	28.846	8.75				ENSG00000126524.9	7	cell organization and biogenesis	cytosol;nucleus		Pf01172, Pf09377	0.936	0.974	0.996	17760000	16590000	16490000	16630000	16150000	16430000		0.967939	0.313589	65.608	0	152.807	19
FALSE	High	Master Protein	P62316	Small nuclear ribonucleoprotein Sm D2 OS=Homo sapiens GN=SNRPD2 PE=1 SV=1	0	91.8022	61.8644	8	80	5	1	118	13.518	9.91		6633	SNRPD2	ENSG00000125743.10	19	cell organization and biogenesis;metabolic process;transport	cytoplasm;cytosol;nucleus;spliceosomal complex	protein binding;RNA binding	Pf01423	1.024	0.972	0.973	17710000	18230000	17990000	18130000	17720000	17500000		0.989245	0.463978	4215.97	4	259.231	8
FALSE	High	Master Protein	A8MT02	Small nuclear ribonucleoprotein-associated proteins B and B' OS=Homo sapiens GN=SNRPB PE=1 SV=3	0	94.6749	22.9167	9	60	9	1	288	29.955	10.18									Pf01423	0.972	1.043	0.914	17610000	17070000	17760000	17120000	17810000	16230000		0.975591	0.462584	38.811	0	197.066	9
FALSE	High	Master Protein	P09496	Clathrin light chain A OS=Homo sapiens GN=CLTA PE=1 SV=1	0	15.3759	16.5323	6	19	5	1	248	27.06	4.51		1211	CLTA	ENSG00000122705.16	9	cell division;cell organization and biogenesis;cellular component movement;metabolic process;transport	cytoplasm;cytoskeleton;cytosol;membrane	protein binding;structural molecule activity	Pf01086	0.974	0.981	0.981	17610000	17330000	17680000	17150000	17000000	17340000		0.978525	0.0609468	9	1	52.4211	6
FALSE	High	Master Protein	Q7L1Q6	Basic leucine zipper and W2 domain-containing protein 1 OS=Homo sapiens GN=BZW1 PE=1 SV=1	0	92.0571	34.1289	18	54	15	1	419	48.013	5.92		9689	BZW1	ENSG00000082153.17	2	metabolic process;regulation of biological process	cytoplasm;membrane	protein binding;RNA binding	Pf02020	1.02	1.012	0.976	17500000	17240000	17860000	17850000	17460000	17440000		1.00285	0.835084	18.055	0	151.623	18
FALSE	High	Master Protein	Q14152	Eukaryotic translation initiation factor 3 subunit A OS=Homo sapiens GN=EIF3A PE=1 SV=1	0	490.908	51.6643	87	314	87	1	1382	166.468	6.79		8661	EIF3A	ENSG00000107581.12	10	cell organization and biogenesis;metabolic process;regulation of biological process	cytoplasm;cytosol;membrane;nucleus	protein binding;RNA binding;structural molecule activity	Pf01399	0.988	1.01	1.01	17470000	17530000	17660000	17270000	17700000	17840000		1.00285	0.803597	217.003	0	888.116	87
FALSE	High	Master Protein	H3BLZ8	Probable ATP-dependent RNA helicase DDX17 OS=Homo sapiens GN=DDX17 PE=1 SV=1	0	337.378	51.9836	36	188	28	1	731	80.389	8.37				ENSG00000100201.20	22			nucleotide binding	Pf00270, Pf00271	0.987	0.992	0.963	17390000	17370000	18060000	17160000	17220000	17390000		0.980121	0.258987	202.092	0	582.988	36
FALSE	High	Master Protein	P08559	Pyruvate dehydrogenase E1 component subunit alpha, somatic form, mitochondrial OS=Homo sapiens GN=PDHA1 PE=1 SV=3	0	135.896	52.3077	21	66	21	1	390	43.268	8.06		5160	PDHA1	ENSG00000131828.13	X	metabolic process;regulation of biological process	mitochondrion;nucleus;organelle lumen	catalytic activity	Pf00676	0.972	0.982	1.011	17380000	17040000	16690000	16900000	16730000	16870000		0.988065	0.416623	45.416	0	186.965	21
FALSE	High	Master Protein	P49773	Histidine triad nucleotide-binding protein 1 OS=Homo sapiens GN=HINT1 PE=1 SV=2	0	44.9194	59.5238	6	23	6	1	126	13.793	6.95		3094	HINT1	ENSG00000169567.11	5	cell death;metabolic process;regulation of biological process;response to stimulus	cytoplasm;cytoskeleton;cytosol;membrane;nucleus	catalytic activity;nucleotide binding;protein binding	Pf01230, Pf11969	0.988	0.952	0.993	17200000	17520000	16900000	17010000	16670000	16780000		0.977528	0.151791	22.714	0	75.2342	6
FALSE	High	Master Protein	C9JRZ8	Aldo-keto reductase family 1 member B15 OS=Homo sapiens GN=AKR1B15 PE=1 SV=2	0.00430673	4.15681	5.06329	2	4	1	1	316	36.514	6.7		441282	AKR1B15		7	metabolic process	cytoplasm;cytosol;mitochondrion;organelle lumen	catalytic activity	Pf00248	0.953	0.949	0.922	17110000	16460000	16560000	16300000	15620000	15260000		0.941153	0.0636746	0.413	0	9.79724	2
FALSE	High	Master Protein	A0A0C4DG17	40S ribosomal protein SA OS=Homo sapiens GN=RPSA PE=1 SV=1	0	115.163	44.6667	11	96	7	1	300	33.293	4.87		3921	RPSA	ENSG00000168028.13	3	cell differentiation;cell organization and biogenesis;metabolic process;transport	cytoplasm;cytosol;membrane;nucleus;ribosome	protein binding;receptor activity;RNA binding;structural molecule activity	Pf00318	1.013	1.014	1	17070000	17150000	17370000	17300000	17390000	17380000		1.0093	0.209975	83.834	4	289.192	11
FALSE	High	Master Protein	P37837	Transaldolase OS=Homo sapiens GN=TALDO1 PE=1 SV=2	0	143.542	47.181	19	101	18	1	337	37.516	6.81		6888	TALDO1	ENSG00000177156.10	11	metabolic process	cytoplasm;cytosol;nucleus	catalytic activity;protein binding	Pf00923	0.962	0.972	0.996	16900000	16760000	16190000	16260000	16290000	16120000		0.976329	0.207064	243.844	1	272.987	19
FALSE	High	Master Protein	P29373	Cellular retinoic acid-binding protein 2 OS=Homo sapiens GN=CRABP2 PE=1 SV=2	0	51.8632	40.5797	6	18	6	1	138	15.683	5.4		1382	CRABP2	ENSG00000143320.8	1	metabolic process;regulation of biological process;response to stimulus;transport	cytoplasm;cytosol;endoplasmic reticulum;nucleus	protein binding;transporter activity	Pf00061, Pf14651	0.964	1.017	0.988	16770000	16240000	16320000	16170000	16520000	16120000		0.989459	0.453516	30.623	0	57.66	6
FALSE	High	Master Protein	P61088	Ubiquitin-conjugating enzyme E2 N OS=Homo sapiens GN=UBE2N PE=1 SV=1	0	51.7011	48.0263	9	36	9	1	152	17.127	6.57		7334	UBE2N	ENSG00000177889.9	12	cell organization and biogenesis;metabolic process;regulation of biological process;response to stimulus;transport	cytoplasm;cytosol;nucleus	catalytic activity;nucleotide binding;protein binding;RNA binding	Pf00179, Pf05743, Pf05773	1.012	0.943	1.03	16760000	17590000	16880000	16970000	16590000	17380000		0.994339	0.793506	78.433	0	97.2562	9
FALSE	High	Master Protein	Q99584	Protein S100-A13 OS=Homo sapiens GN=S100A13 PE=1 SV=1	0	32.2783	48.9796	6	16	6	1	98	11.464	6.16		6284	S100A13	ENSG00000189171.14	1	regulation of biological process;response to stimulus;transport	cytoplasm;cytosol;extracellular;membrane;nucleus;vacuole	metal ion binding;protein binding	Pf01023	0.956	0.993	0.962	16570000	15570000	16630000	15850000	15470000	15990000		0.970064	0.293734	30.623	0	48.9965	6
FALSE	High	Master Protein	P07741	Adenine phosphoribosyltransferase OS=Homo sapiens GN=APRT PE=1 SV=2	0	51.7089	62.7778	11	46	11	1	180	19.595	6.02		353	APRT	ENSG00000198931.10	16	metabolic process;response to stimulus;transport	cytoplasm;cytosol;extracellular;organelle lumen	catalytic activity;nucleotide binding	Pf00156	0.909	0.851	0.928	16560000	16880000	16230000	15050000	14350000	15070000		0.895309	0.00532973	25.102	0	105.846	11
FALSE	High	Master Protein	Q14974	Importin subunit beta-1 OS=Homo sapiens GN=KPNB1 PE=1 SV=2	0	328.335	38.6986	28	204	28	1	876	97.108	4.78		3837	KPNB1	ENSG00000108424.9	17	cell organization and biogenesis;cellular component movement;metabolic process;regulation of biological process;response to stimulus;transport	cytoplasm;cytosol;extracellular;membrane;nucleus;organelle lumen	metal ion binding;protein binding;RNA binding;transporter activity	Pf02985, Pf03810, Pf13513, Pf13646	0.968	1.018	0.974	16380000	15560000	16020000	15850000	15840000	15600000		0.98603	0.451671	79.309	0	618.696	28
FALSE	High	Master Protein	Q12906	Interleukin enhancer-binding factor 3 OS=Homo sapiens GN=ILF3 PE=1 SV=3	0	331.122	50.5593	34	193	18	1	894	95.279	8.76		3609	ILF3	ENSG00000129351.17	19	defense response;metabolic process;regulation of biological process;response to stimulus	cytoplasm;membrane;mitochondrion;nucleus	DNA binding;protein binding;RNA binding	Pf00035, Pf07528, Pf14709	0.969	0.988	0.993	16360000	16130000	16340000	15850000	15930000	16230000		0.983207	0.129509	117.351	16	570.526	34
FALSE	High	Master Protein	Q15691	Microtubule-associated protein RP/EB family member 1 OS=Homo sapiens GN=MAPRE1 PE=1 SV=3	0	154.661	52.9851	15	68	13	1	268	29.98	5.14		22919	MAPRE1	ENSG00000101367.8	20	cell division;cell organization and biogenesis;cell proliferation;regulation of biological process	cytoplasm;cytoskeleton;cytosol;Golgi	protein binding;RNA binding	Pf00307, Pf03271	0.981	0.963	1.008	16350000	16070000	15760000	16040000	15470000	15890000		0.983811	0.341565	250.189	2	224.704	15
FALSE	High	Master Protein	P12270	Nucleoprotein TPR OS=Homo sapiens GN=TPR PE=1 SV=3	0	806.713	45.2391	112	304	111	1	2363	267.131	5.02		7175	TPR	ENSG00000047410.13	1	cell division;cell organization and biogenesis;metabolic process;regulation of biological process;response to stimulus;transport	chromosome;cytoplasm;cytoskeleton;membrane;nucleus	catalytic activity;motor activity;protein binding;RNA binding;structural molecule activity;transporter activity	Pf00038, Pf01496, Pf01576, Pf02463, Pf03961, Pf04111, Pf05911, Pf07888, Pf07926, Pf09726, Pf12128, Pf13166, Pf13514	0.973	0.982	0.983	16330000	16140000	16110000	15900000	15860000	15830000		0.979621	0.032465	83.451	1	987.89	112
FALSE	High	Master Protein	A0A087WWU8	Tropomyosin alpha-3 chain OS=Homo sapiens GN=TPM3 PE=1 SV=1	0	134.93	61.2335	21	83	4	1	227	26.404	4.78		7170	TPM3	ENSG00000143549.19	1	cell organization and biogenesis;cellular component movement	cytoskeleton;cytosol	protein binding;structural molecule activity	Pf00261, Pf12718	0.982	1.013	0.948	16330000	16100000	16840000	16040000	16320000	15960000		0.980718	0.287449	272.842	18	249.618	21
FALSE	High	Master Protein	Q9NZI8	Insulin-like growth factor 2 mRNA-binding protein 1 OS=Homo sapiens GN=IGF2BP1 PE=1 SV=2	0	309.049	52.8596	29	160	27	1	577	63.441	9.2		10642	IGF2BP1	ENSG00000159217.9	17	cell proliferation;metabolic process;regulation of biological process;transport	cytoplasm;cytosol;nucleus	nucleotide binding;protein binding;RNA binding;translation regulator activity	Pf00013, Pf00076, Pf13014, Pf13893, Pf14259	1.003	1.001	1.008	16150000	16350000	16050000	16200000	16360000	16180000		1.00391	0.584017	327.193	4	541.957	29
FALSE	High	Master Protein	O75937	DnaJ homolog subfamily C member 8 OS=Homo sapiens GN=DNAJC8 PE=1 SV=2	0	67.0998	37.5494	12	42	12	1	253	29.823	9.06		22826	DNAJC8	ENSG00000126698.10	1	metabolic process	cytosol		Pf00226	1.029	0.989	1.017	16000000	15850000	15820000	16460000	15680000	16100000		1.01196	0.490945	30.623	0	114.279	12
FALSE	High	Master Protein	Q02790	Peptidyl-prolyl cis-trans isomerase FKBP4 OS=Homo sapiens GN=FKBP4 PE=1 SV=3	0	294.653	69.0632	34	200	34	1	459	51.772	5.43		2288	FKBP4	ENSG00000004478.7	12	cell organization and biogenesis;metabolic process;regulation of biological process;response to stimulus;transport	cytoplasm;cytoskeleton;cytosol;mitochondrion;nucleus	catalytic activity;nucleotide binding;protein binding;RNA binding	Pf00254, Pf00515, Pf07719, Pf13174, Pf13371, Pf13414, Pf13424, Pf13432, Pf14559	1.006	1.003	0.995	15980000	16170000	16370000	16080000	16210000	16290000		1.00124	0.885631	572.615	0	560.345	34
FALSE	High	Master Protein	Q9UK45	U6 snRNA-associated Sm-like protein LSm7 OS=Homo sapiens GN=LSM7 PE=1 SV=1	0	20.5913	54.3689	5	17	4	1	103	11.595	5.27		51690	LSM7	ENSG00000130332.14	19	metabolic process	cytosol;nucleus;spliceosomal complex	protein binding;RNA binding	Pf01423	0.976	1.063	1.033	15890000	16080000	16470000	15510000	17090000	17020000		1.02436	0.532103	30.623	0	36.3	5
FALSE	High	Master Protein	M0R0R2	40S ribosomal protein S5 OS=Homo sapiens GN=RPS5 PE=1 SV=1	0	80.2198	33.3333	11	59	11	1	225	25.317	9.76				ENSG00000083845.8	19	metabolic process	ribosome	RNA binding;structural molecule activity	Pf00177	0.982	0.963	1.033	15750000	15390000	15180000	15470000	14820000	15690000		0.99266	0.736041	99	0	168.592	11
FALSE	High	Master Protein	P68036	Ubiquitin-conjugating enzyme E2 L3 OS=Homo sapiens GN=UBE2L3 PE=1 SV=1	0	39.0086	53.2468	7	23	7	1	154	17.85	8.51		7332	UBE2L3	ENSG00000185651.14	22	cell proliferation;metabolic process;regulation of biological process;response to stimulus	cytoplasm;cytosol;nucleus	catalytic activity;enzyme regulator activity;nucleotide binding;protein binding;RNA binding	Pf00179	0.92	1.083	0.956	15740000	15420000	16020000	14470000	16710000	15310000		0.985375	0.76249	36.276	0	70.0414	7
FALSE	High	Master Protein	P53999	Activated RNA polymerase II transcriptional coactivator p15 OS=Homo sapiens GN=SUB1 PE=1 SV=3	0	52.4551	49.6063	8	81	8	1	127	14.386	9.6		10923	SUB1	ENSG00000113387.11	5	cell organization and biogenesis;metabolic process;regulation of biological process;response to stimulus	nucleus	catalytic activity;DNA binding;protein binding;RNA binding	Pf02229	0.967	0.964	0.954	15690000	15540000	15750000	15170000	14980000	15020000		0.961473	0.00213789	1466.8	0	178.78	8
FALSE	High	Master Protein	J3QQX2	Rho GDP-dissociation inhibitor 1 OS=Homo sapiens GN=ARHGDIA PE=1 SV=1	0	65.6092	30.2128	10	41	10	1	235	25.815	7.44		396	ARHGDIA	ENSG00000141522.11	17	cellular component movement;regulation of biological process;response to stimulus	cytoplasm;cytoskeleton;cytosol;membrane;nucleus	enzyme regulator activity;protein binding	Pf02115	0.977	1.022	1	15650000	14810000	15350000	15290000	15140000	15340000		0.999127	0.962303	42.288	0	119.597	10
FALSE	High	Master Protein	Q16576	Histone-binding protein RBBP7 OS=Homo sapiens GN=RBBP7 PE=1 SV=1	0	117.585	33.4118	13	74	7	1	425	47.79	5.05		5931	RBBP7	ENSG00000102054.17	X	cell organization and biogenesis;cell proliferation;development;metabolic process;regulation of biological process;response to stimulus	cytosol;nucleus	catalytic activity;protein binding;RNA binding	Pf00400, Pf12265	0.985	0.999	0.946	15570000	15400000	15660000	15340000	15380000	14820000		0.976624	0.170967	34.481	8	221.285	13
FALSE	High	Master Protein	P17096	High mobility group protein HMG-I/HMG-Y OS=Homo sapiens GN=HMGA1 PE=1 SV=3	0	23.4864	23.3645	3	11	3	1	107	11.669	10.32		3159	HMGA1	ENSG00000137309.19	6	cell organization and biogenesis;metabolic process;regulation of biological process;response to stimulus;transport	chromosome;cytosol;nucleus	catalytic activity;DNA binding;protein binding		1.046	1.041	0.974	15560000	14820000	15860000	16280000	15430000	15450000		1.0199	0.503314	9	0	36.0809	3
FALSE	High	Master Protein	P00505	Aspartate aminotransferase, mitochondrial OS=Homo sapiens GN=GOT2 PE=1 SV=3	0	174.416	59.3023	26	132	26	1	430	47.487	9.01		2806	GOT2	ENSG00000125166.12	16	metabolic process;response to stimulus;transport	cell surface;membrane;mitochondrion;organelle lumen	catalytic activity;protein binding;RNA binding	Pf00155	0.978	0.984	0.956	15540000	15470000	15430000	15190000	15220000	14760000		0.972653	0.0981952	82.768	0	362.636	26
FALSE	High	Master Protein	Q8IUE6	Histone H2A type 2-B OS=Homo sapiens GN=HIST2H2AB PE=1 SV=3	0	19.9707	35.3846	4	262	1	1	130	13.987	10.89		317772	HIST2H2AB	ENSG00000184270.4	1	regulation of biological process	chromosome;nucleus	DNA binding;protein binding	Pf00125, Pf00808	0.956	0.938	0.987	15450000	15780000	15340000	14780000	14800000	15150000		0.96049	0.0268342	13.678	0	538.185	4
FALSE	High	Master Protein	P0A853	Tryptophanase OS=Escherichia coli (strain K12) GN=tnaA PE=1 SV=1	0	208.204	55.6263	26	123	26	1	471	52.74	6.23		948221	tnaA; SH08_00035; SH03_00035; SH06_00035; SH04_00035; SH07_00035; SF31_00035			cell organization and biogenesis;metabolic process	cytoplasm;cytosol;membrane	catalytic activity;metal ion binding;protein binding	Pf01212, Pf05889	1.728	1.754	1.839	15430000	15510000	14760000	26660000	27210000	27140000		1.77265	5.81407e-06	108.26	0	380.653	26
FALSE	High	Master Protein	P0A7S3	30S ribosomal protein S12 OS=Escherichia coli (strain K12) GN=rpsL PE=1 SV=2	0	32.3273	25	5	16	5	1	124	13.729	10.87		29456732; 947845; 31656011	CSK29544_RS06375; rpsL; AL524_RS00930; SF31_21260			metabolic process;regulation of biological process;response to stimulus	cytosol;ribosome	protein binding;RNA binding;structural molecule activity	Pf00164	1.789	1.649	1.73	15100000	15190000	14920000	27010000	25050000	25800000		1.72219	0.00234308	45.416	0	48.5215	5
FALSE	High	Master Protein	P30086	Phosphatidylethanolamine-binding protein 1 OS=Homo sapiens GN=PEBP1 PE=1 SV=3	0	82.6089	55.0802	8	48	8	1	187	21.044	7.53		5037	PEBP1	ENSG00000089220.4	12	metabolic process;regulation of biological process;response to stimulus	cytoplasm;cytosol;nucleus	enzyme regulator activity;nucleotide binding;protein binding;RNA binding	Pf01161	0.983	0.997	0.975	15070000	14860000	15460000	14810000	14810000	15080000		0.984798	0.328834	42.288	0	169.226	8
FALSE	High	Master Protein	P30041	Peroxiredoxin-6 OS=Homo sapiens GN=PRDX6 PE=1 SV=3	0	95.324	49.5536	13	70	13	1	224	25.019	6.38		9588	PRDX6	ENSG00000117592.8	1	cellular homeostasis;metabolic process;regulation of biological process;response to stimulus;transport	cytoplasm;cytosol;extracellular;membrane;nucleus;organelle lumen;vacuole	antioxidant activity;catalytic activity;protein binding	Pf00578, Pf08534, Pf10417	0.985	0.987	0.981	14980000	15160000	14920000	14760000	14960000	14640000		0.984465	0.123525	62.096	0	210.872	13
FALSE	High	Master Protein	Q9Y5B9	FACT complex subunit SPT16 OS=Homo sapiens GN=SUPT16H PE=1 SV=1	0	318.866	42.0248	45	175	45	1	1047	119.838	5.66		11198	SUPT16H	ENSG00000092201.9	14	cell organization and biogenesis;metabolic process;regulation of biological process;response to stimulus	chromosome;nucleus	protein binding;RNA binding	Pf00557, Pf08512, Pf08644, Pf14826	0.986	0.975	0.98	14960000	14980000	15140000	14750000	14610000	14840000		0.980479	0.0300107	41.813	0	492.935	45
FALSE	High	Master Protein	P14854	Cytochrome c oxidase subunit 6B1 OS=Homo sapiens GN=COX6B1 PE=1 SV=2	0	45.379	67.4419	6	33	6	1	86	10.186	7.05		1340	COX6B1	ENSG00000126267.8	19	metabolic process;transport	membrane;mitochondrion	catalytic activity;transporter activity	Pf02297	0.992	1.003	0.998	14960000	15380000	15270000	14840000	15430000	15240000		0.997807	0.884773	99	0	103.911	6
FALSE	High	Master Protein	Q86VP6	Cullin-associated NEDD8-dissociated protein 1 OS=Homo sapiens GN=CAND1 PE=1 SV=2	0	342.149	37.561	43	186	40	1	1230	136.289	5.78		55832	CAND1	ENSG00000111530.12	12	cell differentiation;cell organization and biogenesis;cellular homeostasis;metabolic process;regulation of biological process;transport	cytoplasm;cytosol;extracellular;Golgi;membrane;nucleus;organelle lumen	protein binding	Pf08623, Pf12755, Pf13513	1.025	1.023	1.032	14950000	15210000	15260000	15330000	15560000	15750000		1.02686	0.0615649	21.539	4	614.952	43
FALSE	High	Master Protein	P08708	40S ribosomal protein S17 OS=Homo sapiens GN=RPS17 PE=1 SV=2	0	119.551	62.2222	10	82	10	1	135	15.54	9.85		6218	RPS17; RPS17L	ENSG00000278229.2; ENSG00000182774.10	15; CHR_HSCHR15_5_CTG8	cell organization and biogenesis;metabolic process;transport	cytosol;membrane;ribosome	RNA binding;structural molecule activity	Pf00833	1.041	0.958	0.926	14820000	14890000	15480000	15430000	14270000	14340000		0.974552	0.435742	3.98107e+06	0	248.563	10
FALSE	High	Master Protein	P56385	ATP synthase subunit e, mitochondrial OS=Homo sapiens GN=ATP5I PE=1 SV=2	0	23.4297	52.1739	3	24	3	1	69	7.928	9.35		521	ATP5I	ENSG00000169020.9	4	cell organization and biogenesis;metabolic process;transport	membrane;mitochondrion	catalytic activity;transporter activity	Pf05680	1.03	1.059	0.979	14820000	14620000	15170000	15270000	15490000	14860000		1.02264	0.242256	55.234	0	72.2804	3
FALSE	High	Master Protein	Q15907	Ras-related protein Rab-11B OS=Homo sapiens GN=RAB11B PE=1 SV=4	0	56.8989	53.6697	12	48	1	1	218	24.473	5.94		9230	RAB11B	ENSG00000185236.11	19	cell organization and biogenesis;metabolic process;regulation of biological process;response to stimulus;transport	cytoplasm;cytosol;endosome;membrane;mitochondrion	catalytic activity;nucleotide binding;protein binding	Pf00025, Pf00071, Pf01926, Pf08477, Pf13401	0.978	1.012	0.947	14760000	14640000	15350000	14440000	14810000	14530000		0.978324	0.281227	14.849	10	144.692	12
FALSE	High	Master Protein	Q9Y3F4	Serine-threonine kinase receptor-associated protein OS=Homo sapiens GN=STRAP PE=1 SV=1	0	225.377	65.4286	22	104	22	1	350	38.414	5.12		11171	STRAP	ENSG00000023734.10	12	cell organization and biogenesis;metabolic process;regulation of biological process	cytoplasm;cytosol;nucleus	protein binding;RNA binding	Pf00400	0.97	0.991	0.959	14740000	14510000	14630000	14300000	14380000	14030000		0.973336	0.0449642	207.057	0	337.5	22
FALSE	High	Master Protein	P52209	6-phosphogluconate dehydrogenase, decarboxylating OS=Homo sapiens GN=PGD PE=1 SV=3	0	133.12	33.9545	15	99	15	1	483	53.106	7.23		5226	PGD	ENSG00000142657.20	1	metabolic process	cytoplasm;cytosol;nucleus	catalytic activity	Pf00393, Pf03446	0.989	1.022	1.012	14560000	14430000	14350000	14410000	14740000	14520000		1.00761	0.4011	25.102	0	299.297	15
FALSE	High	Master Protein	Q16531	DNA damage-binding protein 1 OS=Homo sapiens GN=DDB1 PE=1 SV=1	0	242.601	39.2982	43	122	43	1	1140	126.887	5.26		1642	DDB1	ENSG00000167986.13	11	cell organization and biogenesis;metabolic process;regulation of biological process;response to stimulus	cytoplasm;nucleus	DNA binding;protein binding	Pf03178, Pf10433	0.992	1.015	0.965	14550000	14300000	14670000	14440000	14510000	14160000		0.990579	0.421336	16.27	0	368.079	43
FALSE	High	Master Protein	P0A6F5	60 kDa chaperonin OS=Escherichia coli (strain K12) GN=groL PE=1 SV=2	0	244.965	54.7445	27	158	27	1	548	57.293	4.94		948665	groL; SH08_02305; SH03_02305; SH06_02290; SH04_02300; SH07_02305; SF31_02290			cell division;cell organization and biogenesis;metabolic process;response to stimulus	cytoplasm;cytosol;membrane	catalytic activity;metal ion binding;nucleotide binding;protein binding	Pf00118	1.792	1.811	1.817	14550000	14210000	14540000	26070000	25740000	26430000		1.80693	1.07668e-05	115.591	0	483.656	27
FALSE	High	Master Protein	Q9HB71	Calcyclin-binding protein OS=Homo sapiens GN=CACYBP PE=1 SV=2	0	121.276	62.2807	17	69	17	1	228	26.194	8.25		27101	CACYBP	ENSG00000116161.17	1	cell differentiation;regulation of biological process;response to stimulus	cytoplasm;cytosol;nucleus	protein binding	Pf04969, Pf05002, Pf09032	0.979	1.003	1.025	14500000	14230000	14370000	14190000	14280000	14730000		1.00232	0.868657	2309.13	0	198.894	17
FALSE	High	Master Protein	P30044	Peroxiredoxin-5, mitochondrial OS=Homo sapiens GN=PRDX5 PE=1 SV=4	0	105.108	55.6075	9	64	9	1	214	22.073	8.7		25824	PRDX5	ENSG00000126432.13	11	cell death;cellular homeostasis;defense response;metabolic process;regulation of biological process;response to stimulus	cytoplasm;cytosol;mitochondrion;nucleus;organelle lumen	antioxidant activity;catalytic activity;DNA binding;enzyme regulator activity;protein binding	Pf00578, Pf08534	0.965	1.013	0.969	14490000	14180000	14570000	13990000	14370000	14120000		0.982424	0.195457	57.78	0	235.924	9
FALSE	High	Master Protein	A0A0A6YYL6	Protein RPL17-C18orf32 OS=Homo sapiens GN=RPL17-C18orf32 PE=3 SV=1	0	85.3057	49.1228	12	90	11	1	228	26.356	10.1		100526842; 6139	RPL17-C18ORF32; RPL17	ENSG00000215472.10	18	metabolic process	ribosome	structural molecule activity	Pf00237	1.007	0.983	0.996	14450000	15090000	14580000	14550000	14840000	14520000		0.99524	0.771458	120.153	0	209.158	12
FALSE	High	Master Protein	P22087	rRNA 2'-O-methyltransferase fibrillarin OS=Homo sapiens GN=FBL PE=1 SV=2	0	142.882	50.7788	18	83	18	1	321	33.763	10.18		2091	FBL	ENSG00000280548.3; ENSG00000105202.8	19; CHR_HG2021_PATCH	cell differentiation;cell organization and biogenesis;metabolic process	chromosome;membrane;nucleus	catalytic activity;protein binding;RNA binding	Pf01135, Pf01269, Pf13847	0.984	0.952	0.971	14440000	14620000	14230000	14210000	13910000	13820000		0.968815	0.05101	62.096	0	240.126	18
FALSE	High	Master Protein	P08133	Annexin A6 OS=Homo sapiens GN=ANXA6 PE=1 SV=3	0	271.244	64.636	42	154	14	1	673	75.826	5.6		309	ANXA6	ENSG00000197043.13	5	cell organization and biogenesis;cellular homeostasis;regulation of biological process;response to stimulus;transport	cytoplasm;membrane;mitochondrion	metal ion binding;nucleotide binding;protein binding;transporter activity	Pf00191	0.983	0.971	0.995	14430000	14690000	14530000	14190000	14260000	14460000		0.983047	0.0902911	49.646	28	459.689	42
FALSE	High	Master Protein	Q14697	Neutral alpha-glucosidase AB OS=Homo sapiens GN=GANAB PE=1 SV=3	0	277.704	43.1144	40	170	8	1	944	106.807	6.14		23193	GANAB	ENSG00000089597.16	11	metabolic process	endoplasmic reticulum;Golgi;membrane;organelle lumen	catalytic activity;RNA binding	Pf01055, Pf13802	1.001	0.999	0.971	14390000	14390000	14730000	14400000	14380000	14300000		0.990117	0.332834	34.743	28	512.84	40
FALSE	High	Master Protein	P04843	Dolichyl-diphosphooligosaccharide--protein glycosyltransferase subunit 1 OS=Homo sapiens GN=RPN1 PE=1 SV=1	0	180.009	46.7875	29	92	29	1	607	68.527	6.38		6184	RPN1	ENSG00000163902.11	3	metabolic process	cytosol;endoplasmic reticulum;membrane	catalytic activity;protein binding;RNA binding	Pf04597	0.976	0.981	0.998	14330000	14160000	14050000	13980000	13890000	14020000		0.98472	0.099943	20.102	0	297.711	29
FALSE	High	Master Protein	P37108	Signal recognition particle 14 kDa protein OS=Homo sapiens GN=SRP14 PE=1 SV=2	0	34.9133	30.1471	5	13	5	1	136	14.561	10.04		6727	SRP14	ENSG00000140319.10	15	cell organization and biogenesis;response to stimulus;transport	cytoplasm;cytosol;extracellular;nucleus;organelle lumen	protein binding;RNA binding	Pf02290	0.934	0.916	1.003	14330000	14810000	13620000	13390000	13570000	13660000		0.949953	0.169696	12.895	0	49.2512	5
FALSE	High	Master Protein	Q99615	DnaJ homolog subfamily C member 7 OS=Homo sapiens GN=DNAJC7 PE=1 SV=2	0	219.378	57.085	33	99	33	1	494	56.405	6.96		7266	DNAJC7	ENSG00000168259.14	17	metabolic process;regulation of biological process	cytoplasm;cytoskeleton;cytosol;membrane;nucleus	enzyme regulator activity;protein binding	Pf00226, Pf00515, Pf07719, Pf13414, Pf13424, Pf13431, Pf13432	1	0.988	0.987	14320000	14180000	14440000	14310000	14000000	14250000		0.99115	0.357358	114.478	0	299.723	33
FALSE	High	Master Protein	Q96AG4	Leucine-rich repeat-containing protein 59 OS=Homo sapiens GN=LRRC59 PE=1 SV=1	0	116.17	52.443	15	59	15	1	307	34.909	9.57		55379	LRRC59	ENSG00000108829.9	17		endoplasmic reticulum;membrane;nucleus	protein binding;RNA binding	Pf12799, Pf13855	0.983	1.016	0.967	14310000	14170000	14080000	14070000	14400000	13620000		0.988957	0.565682	116.877	0	198.466	15
FALSE	High	Master Protein	Q9UNM6	26S proteasome non-ATPase regulatory subunit 13 OS=Homo sapiens GN=PSMD13 PE=1 SV=2	0	143.492	61.4362	24	71	20	1	376	42.918	5.81		5719	PSMD13	ENSG00000185627.17	11	cell organization and biogenesis;metabolic process;regulation of biological process;response to stimulus;transport	cytosol;extracellular;membrane;nucleus;organelle lumen;proteasome	catalytic activity;protein binding;structural molecule activity	Pf01399	0.98	0.959	0.965	14290000	14480000	14570000	14000000	13880000	14050000		0.967467	0.0131908	40.246	3	226.885	24
FALSE	High	Master Protein	P49588	Alanine--tRNA ligase, cytoplasmic OS=Homo sapiens GN=AARS PE=1 SV=2	0	271.587	44.3182	37	130	37	1	968	106.743	5.53		16	AARS	ENSG00000090861.15	16	metabolic process;regulation of biological process;response to stimulus	cytoplasm;cytosol;membrane;mitochondrion	catalytic activity;metal ion binding;nucleotide binding;RNA binding	Pf01411, Pf02272, Pf07973	0.975	0.956	0.986	14250000	14230000	13880000	13900000	13600000	13680000		0.972144	0.0634119	20.229	0	438.075	37
FALSE	High	Master Protein	Q6P2Q9	Pre-mRNA-processing-splicing factor 8 OS=Homo sapiens GN=PRPF8 PE=1 SV=2	0	449.888	37.7302	85	217	85	1	2335	273.427	8.84		10594	PRPF8	ENSG00000174231.16; ENSG00000274442.2	17; CHR_HSCHR17_1_CTG2	cell organization and biogenesis;metabolic process;response to stimulus	membrane;nucleus;spliceosomal complex	catalytic activity;protein binding;RNA binding	Pf01398, Pf08082, Pf08083, Pf08084, Pf10596, Pf10597, Pf10598, Pf12134	0.982	0.981	0.99	14240000	14420000	14350000	13980000	14150000	14210000		0.984422	0.0656048	10.971	0	664.577	85
FALSE	High	Master Protein	P35998	26S protease regulatory subunit 7 OS=Homo sapiens GN=PSMC2 PE=1 SV=3	0	170.378	68.3603	28	91	28	1	433	48.603	5.95		5701	PSMC2	ENSG00000161057.11	7	cell differentiation;metabolic process;regulation of biological process;response to stimulus;transport	cytoplasm;cytosol;extracellular;membrane;nucleus;organelle lumen;proteasome	catalytic activity;nucleotide binding;protein binding	Pf00004, Pf00158, Pf07724, Pf07726, Pf07728, Pf13191, Pf13401	0.958	0.937	0.975	14240000	14200000	14000000	13650000	13310000	13650000		0.95688	0.0150995	75.668	0	296.478	28
FALSE	High	Master Protein	P62857	40S ribosomal protein S28 OS=Homo sapiens GN=RPS28 PE=1 SV=1	0	29.2656	68.1159	5	32	5	1	69	7.836	10.7		6234	RPS28	ENSG00000233927.4	19	cell organization and biogenesis;metabolic process;transport	cytosol;ribosome	protein binding;RNA binding;structural molecule activity	Pf01200	0.934	0.978	1.02	14240000	13760000	12810000	13310000	13460000	13070000		0.976231	0.526279	999	0	79.7072	5
FALSE	High	Master Protein	G8JLB6	Heterogeneous nuclear ribonucleoprotein H OS=Homo sapiens GN=HNRNPH1 PE=1 SV=1	0	197.05	51.2712	17	153	8	1	472	51.197	6.8		3187	HNRNPH1	ENSG00000169045.17; ENSG00000284254.1	5; CHR_HG30_PATCH	metabolic process;regulation of biological process;response to stimulus	cytosol;membrane;nucleus;spliceosomal complex	nucleotide binding;protein binding;RNA binding	Pf00076, Pf08080, Pf14259	0.991	0.984	0.96	14210000	13900000	13860000	14090000	13670000	13310000		0.978556	0.320344	176.828	10	509.857	17
FALSE	High	Master Protein	P05023	Sodium/potassium-transporting ATPase subunit alpha-1 OS=Homo sapiens GN=ATP1A1 PE=1 SV=1	0	375.183	39.8827	44	163	26	1	1023	112.824	5.49		476	ATP1A1	ENSG00000163399.15	1	cell communication;cellular homeostasis;metabolic process;regulation of biological process;response to stimulus;transport	endoplasmic reticulum;endosome;Golgi;membrane	catalytic activity;metal ion binding;nucleotide binding;protein binding;transporter activity	Pf00122, Pf00689, Pf00690, Pf00702, Pf08282, Pf12710, Pf13246	0.968	0.996	0.976	14190000	13900000	14320000	13740000	13850000	13980000		0.980193	0.139547	104.021	19	552.424	44
FALSE	High	Master Protein	P10515	Dihydrolipoyllysine-residue acetyltransferase component of pyruvate dehydrogenase complex, mitochondrial OS=Homo sapiens GN=DLAT PE=1 SV=3	0	137.784	32.3029	20	77	20	1	647	68.953	7.84		1737	DLAT	ENSG00000150768.15	11	metabolic process;regulation of biological process	mitochondrion;organelle lumen	catalytic activity;protein binding	Pf00198, Pf00364, Pf02817	0.941	0.971	0.96	14120000	13710000	13550000	13290000	13320000	13000000		0.957226	0.05243	12.895	0	221.934	20
FALSE	High	Master Protein	P60468	Protein transport protein Sec61 subunit beta OS=Homo sapiens GN=SEC61B PE=1 SV=2	0	12.6363	21.875	2	10	2	1	96	9.968	11.56		10952	SEC61B	ENSG00000106803.9	9	metabolic process;regulation of biological process;transport	cytosol;endoplasmic reticulum;membrane	protein binding;RNA binding;transporter activity	Pf03911	1.055	1.077	1.053	14110000	13600000	13990000	14880000	14650000	14720000		1.06115	0.0183666	3.642	0	29.7082	2
FALSE	High	Master Protein	O75534	Cold shock domain-containing protein E1 OS=Homo sapiens GN=CSDE1 PE=1 SV=2	0	276.011	47.3684	41	134	41	1	798	88.829	6.25		7812	CSDE1	ENSG00000009307.15	1	metabolic process;regulation of biological process	cytoplasm;cytosol;Golgi;membrane	DNA binding;protein binding;RNA binding	Pf00313, Pf12901	0.983	0.999	0.976	14070000	13960000	13990000	13840000	13940000	13660000		0.986197	0.128861	34.565	0	396.964	41
FALSE	High	Master Protein	Q9Y3C6	Peptidyl-prolyl cis-trans isomerase-like 1 OS=Homo sapiens GN=PPIL1 PE=1 SV=1	0	36.0381	42.1687	7	18	7	1	166	18.225	7.99		51645	PPIL1	ENSG00000137168.7	6	metabolic process	spliceosomal complex	catalytic activity;protein binding	Pf00160	0.977	1.031	0.999	14020000	13270000	13990000	13700000	13680000	13970000		1.0017	0.935603	15.681	0	46.1061	7
FALSE	High	Master Protein	P27824	Calnexin OS=Homo sapiens GN=CANX PE=1 SV=2	0	193.903	43.0743	31	152	20	1	592	67.526	4.6		821	CANX	ENSG00000127022.14; ENSG00000283777.1	5; CHR_HG30_PATCH	metabolic process;transport	cytoplasm;endoplasmic reticulum;membrane;organelle lumen;ribosome	metal ion binding;protein binding;RNA binding	Pf00262	0.981	0.98	0.968	14010000	14180000	14400000	13740000	13890000	13930000		0.975816	0.0738449	99	8	395.051	31
FALSE	High	Master Protein	Q15056	Eukaryotic translation initiation factor 4H OS=Homo sapiens GN=EIF4H PE=1 SV=5	0	58.6784	45.1613	11	34	11	1	248	27.368	7.23		7458	EIF4H	ENSG00000106682.14	7	cell organization and biogenesis;metabolic process;regulation of biological process;reproduction	cytoplasm;cytosol;membrane	catalytic activity;nucleotide binding;protein binding;RNA binding	Pf00076, Pf13893, Pf14259	0.958	0.971	0.977	14010000	14410000	14330000	13420000	13990000	14000000		0.968655	0.133409	18.307	0	93.642	11
FALSE	High	Master Protein	P07339	Cathepsin D OS=Homo sapiens GN=CTSD PE=1 SV=1	0	135.989	37.3786	13	70	13	1	412	44.524	6.54		1509	CTSD	ENSG00000117984.13	11	metabolic process;transport	extracellular;membrane;organelle lumen;vacuole	catalytic activity;protein binding	Pf00026, Pf07966, Pf14541, Pf14543	0.944	0.962	0.962	13980000	13720000	13500000	13190000	13200000	12980000		0.955583	0.0298378	56.797	0	217.507	13
FALSE	High	Master Protein	P54819	Adenylate kinase 2, mitochondrial OS=Homo sapiens GN=AK2 PE=1 SV=2	0	134.306	61.5063	13	82	12	1	239	26.461	7.81		204	AK2	ENSG00000004455.16	1	metabolic process	membrane;mitochondrion	catalytic activity;nucleotide binding	Pf00406, Pf05191, Pf13207, Pf13671	0.988	1.001	0.974	13880000	13900000	13780000	13710000	13910000	13420000		0.987488	0.347093	371.759	0	252.452	13
FALSE	High	Master Protein	P11766	Alcohol dehydrogenase class-3 OS=Homo sapiens GN=ADH5 PE=1 SV=4	0	85.9792	31.5508	13	42	13	1	374	39.698	7.49		128	ADH5	ENSG00000197894.10	4	metabolic process;response to stimulus	cytoplasm;cytosol;mitochondrion	catalytic activity;metal ion binding;protein binding	Pf00107, Pf08240	0.976	0.979	0.978	13870000	13680000	13690000	13530000	13390000	13400000		0.977692	0.0190091	34.938	0	125.189	13
FALSE	High	Master Protein	P53621	Coatomer subunit alpha OS=Homo sapiens GN=COPA PE=1 SV=2	0	428.898	57.7614	66	168	66	1	1224	138.258	7.66		1314	COPA	ENSG00000122218.14	1	transport	cytoplasm;cytosol;extracellular;Golgi;membrane	protein binding;structural molecule activity	Pf00400, Pf04053, Pf06957	0.988	0.988	0.994	13760000	13950000	13970000	13590000	13780000	13890000		0.989923	0.277391	45.416	0	530.329	66
FALSE	High	Master Protein	P46783	40S ribosomal protein S10 OS=Homo sapiens GN=RPS10 PE=1 SV=1	0	70.2713	53.9394	11	76	10	1	165	18.886	10.15		6204	RPS10	ENSG00000124614.13	6	cell organization and biogenesis;metabolic process;transport	cytoplasm;cytosol;membrane;nucleus;ribosome	protein binding;RNA binding;structural molecule activity	Pf03501	0.968	0.998	0.97	13720000	12930000	13610000	13280000	12910000	13200000		0.97839	0.368821	99	0	214.724	11
FALSE	High	Master Protein	Q04760	Lactoylglutathione lyase OS=Homo sapiens GN=GLO1 PE=1 SV=4	0	54.1125	32.0652	9	42	9	1	184	20.764	5.31		2739	GLO1	ENSG00000124767.6	6	cell differentiation;metabolic process;regulation of biological process	cytoplasm;cytosol;membrane;nucleus	catalytic activity;metal ion binding	Pf00903, Pf12681, Pf13669	1.015	1.015	0.987	13670000	14030000	14270000	13880000	14240000	14090000		1.00572	0.718112	80.113	0	105.666	9
FALSE	High	Master Protein	Q96AE4	Far upstream element-binding protein 1 OS=Homo sapiens GN=FUBP1 PE=1 SV=3	0	244.434	55.5901	31	121	16	1	644	67.518	7.61		8880	FUBP1	ENSG00000162613.16	1	metabolic process;regulation of biological process	nucleus	DNA binding;protein binding;RNA binding	Pf00013, Pf07650, Pf13014	0.979	1.003	1.014	13620000	13330000	13230000	13340000	13360000	13420000		0.998507	0.881303	106.461	11	373.574	31
FALSE	High	Master Protein	O76003	Glutaredoxin-3 OS=Homo sapiens GN=GLRX3 PE=1 SV=2	0	104.576	40	14	48	14	1	335	37.408	5.39		10539	GLRX3	ENSG00000108010.11	10	cell organization and biogenesis;cellular homeostasis;metabolic process;regulation of biological process	cytoplasm;cytosol;nucleus;spliceosomal complex	catalytic activity;metal ion binding;protein binding;RNA binding	Pf00085, Pf00462, Pf02114, Pf02966, Pf04908, Pf13098, Pf13905	0.979	0.995	0.985	13470000	13360000	13430000	13190000	13280000	13240000		0.986339	0.0125398	39.842	0	148.683	14
FALSE	High	Master Protein	Q9Y230	RuvB-like 2 OS=Homo sapiens GN=RUVBL2 PE=1 SV=3	0	263.678	56.8035	29	131	29	1	463	51.125	5.64		10856	RUVBL2	ENSG00000183207.13	19	cell organization and biogenesis;metabolic process;regulation of biological process;response to stimulus	cytoplasm;cytosol;membrane;nucleus	catalytic activity;DNA binding;nucleotide binding;protein binding	Pf00004, Pf03796, Pf06068, Pf13481	0.984	0.976	1.003	13430000	13550000	13460000	13220000	13230000	13490000		0.987636	0.191182	233.623	0	416.541	29
FALSE	High	Master Protein	P0A9Y6	Cold shock-like protein CspC OS=Escherichia coli (strain K12) GN=cspC PE=1 SV=2	0	24.1187	56.5217	3	18	3	1	69	7.398	7.24		8911702; 946339	cspC; EAMY_RS26670; SH08_13255; SH03_13155; SH06_13460; SH04_13145; SH07_13150; SF31_13460			metabolic process;regulation of biological process	cytoplasm;cytosol;membrane	DNA binding;protein binding;RNA binding	Pf00313	1.84	1.841	1.816	13340000	12250000	12900000	24550000	22550000	23430000		1.83242	0.000426049	16.783	0	52.055	3
FALSE	High	Master Protein	P50914	60S ribosomal protein L14 OS=Homo sapiens GN=RPL14 PE=1 SV=4	0	37.1879	24.6512	5	26	5	1	215	23.417	10.93		9045	RPL14	ENSG00000188846.13	3	cell organization and biogenesis;metabolic process;transport	cytosol;membrane;ribosome	protein binding;RNA binding;structural molecule activity	Pf01929	0.993	0.997	0.995	13300000	13510000	13430000	13210000	13460000	13360000		0.994781	0.503145	45.416	0	83.2617	5
FALSE	High	Master Protein	P11177	Pyruvate dehydrogenase E1 component subunit beta, mitochondrial OS=Homo sapiens GN=PDHB PE=1 SV=3	0	138.942	38.9972	12	85	12	1	359	39.208	6.65		5162	PDHB	ENSG00000168291.12	3	metabolic process;regulation of biological process	mitochondrion;nucleus;organelle lumen	catalytic activity;protein binding	Pf02779, Pf02780	0.998	0.972	0.993	13280000	12990000	12860000	13260000	12630000	12760000		0.987733	0.52871	99	0	269.126	12
FALSE	High	Master Protein	P00441	Superoxide dismutase [Cu-Zn] OS=Homo sapiens GN=SOD1 PE=1 SV=2	0	86.7365	77.9221	10	116	10	1	154	15.926	6.13		6647	SOD1	ENSG00000142168.14	21	cell organization and biogenesis;cellular component movement;cellular homeostasis;metabolic process;regulation of biological process;response to stimulus;transport	cytoplasm;cytosol;extracellular;membrane;mitochondrion;nucleus;organelle lumen;vacuole	antioxidant activity;catalytic activity;metal ion binding;protein binding	Pf00080	1.002	0.999	0.939	13250000	13010000	13470000	13280000	12990000	12650000		0.979612	0.302689	214.443	0	290.01	10
FALSE	High	Master Protein	P41091	Eukaryotic translation initiation factor 2 subunit 3 OS=Homo sapiens GN=EIF2S3 PE=1 SV=3	0	121.452	40.678	17	56	17	1	472	51.077	8.4		1968	EIF2S3	ENSG00000130741.10	X	metabolic process;transport	cytoplasm;cytosol;nucleus	catalytic activity;nucleotide binding;protein binding;RNA binding	Pf00009, Pf03144, Pf09173	0.958	1.006	0.996	13190000	12880000	13110000	12640000	12950000	13050000		0.986217	0.313269	27.73	0	164.169	17
FALSE	High	Master Protein	Q99442	Translocation protein SEC62 OS=Homo sapiens GN=SEC62 PE=1 SV=1	0	31.4264	15.5388	7	11	7	1	399	45.833	7.12		7095	SEC62	ENSG00000008952.16	3	cell organization and biogenesis;transport	cytosol;endoplasmic reticulum;membrane	receptor activity;transporter activity	Pf03839	0.995	1.03	1.012	13170000	12780000	12860000	13100000	13160000	13020000		1.01211	0.318063	3.217	0	33.2627	7
FALSE	High	Master Protein	P05455	Lupus La protein OS=Homo sapiens GN=SSB PE=1 SV=2	0	235.146	54.902	30	131	30	1	408	46.808	7.12		6741	SSB	ENSG00000138385.15	2	metabolic process;transport	cytoplasm;nucleus	nucleotide binding;protein binding;RNA binding	Pf00076, Pf05383, Pf08777, Pf14259	0.996	0.977	0.982	13140000	13110000	13110000	13090000	12810000	12870000		0.98501	0.145275	899.628	0	358.708	30
FALSE	High	Master Protein	A0A087WZT3	BolA-like protein 2 OS=Homo sapiens GN=BOLA2 PE=1 SV=2	0	36.6263	39.4737	5	19	5	1	152	16.922	8.19		552900; 654483; 102725214; 107984053	LOC101060252; BOLA2; BOLA2B; LOC102725214; LOC107984053	ENSG00000183336.8; ENSG00000169627.7	16	cell organization and biogenesis;metabolic process	cytoplasm;nucleus	protein binding	Pf01722	0.964	0.987	0.977	13140000	13160000	13360000	12680000	13000000	13050000		0.976551	0.0983141	6.943	0	66.012	5
FALSE	High	Master Protein	Q9NYC9	Dynein heavy chain 9, axonemal OS=Homo sapiens GN=DNAH9 PE=1 SV=3	0.000981154	6.49925	0.490415	3	5	2	1	4486	511.551	5.91		1770	DNAH9	ENSG00000007174.17	17	cell organization and biogenesis;cellular component movement	cytoplasm;cytoskeleton	catalytic activity;motor activity;nucleotide binding	Pf03028, Pf07728, Pf08385, Pf08393, Pf12774, Pf12775, Pf12777, Pf12780, Pf12781	1.037	0.897	1.017	13140000	14510000	13380000	13620000	13020000	13610000		0.98099	0.618276	0.038	0	13.0531	3
FALSE	High	Master Protein	P63220	40S ribosomal protein S21 OS=Homo sapiens GN=RPS21 PE=1 SV=1	0	69.0599	54.2169	6	40	6	1	83	9.106	8.5		6227	RPS21	ENSG00000171858.17	20	cell organization and biogenesis;metabolic process;transport	cytosol;ribosome	protein binding;RNA binding;structural molecule activity	Pf01249	0.881	0.879	1	13090000	12820000	12370000	11530000	11270000	12370000		0.918757	0.0685949	2510.89	0	112.239	6
FALSE	High	Master Protein	P52597	Heterogeneous nuclear ribonucleoprotein F OS=Homo sapiens GN=HNRNPF PE=1 SV=3	0	132.889	39.0361	12	77	10	1	415	45.643	5.58		3185	HNRNPF	ENSG00000169813.16	10	metabolic process;regulation of biological process;response to stimulus	cytosol;membrane;nucleus;spliceosomal complex	nucleotide binding;protein binding;RNA binding	Pf00076, Pf08080, Pf14259	0.965	0.965	0.942	13020000	12940000	12720000	12560000	12490000	11990000		0.957601	0.0738822	65.608	0	266.862	12
FALSE	High	Master Protein	Q14019	Coactosin-like protein OS=Homo sapiens GN=COTL1 PE=1 SV=3	0	20.6427	35.9155	7	16	7	1	142	15.935	5.67		23406	COTL1	ENSG00000103187.7	16	defense response;response to stimulus;transport	cytoplasm;cytoskeleton;extracellular;nucleus;organelle lumen	protein binding	Pf00241, Pf01453	0.958	0.978	0.994	13020000	12830000	12740000	12470000	12540000	12660000		0.97616	0.0439584	11.915	0	37.4236	7
FALSE	High	Master Protein	O75880	Protein SCO1 homolog, mitochondrial OS=Homo sapiens GN=SCO1 PE=1 SV=1	0	21.5731	16.2791	6	13	6	1	301	33.793	8.88		6341	SCO1	ENSG00000133028.10	17	cell organization and biogenesis;cellular homeostasis;metabolic process;regulation of biological process;transport	membrane;mitochondrion	antioxidant activity;catalytic activity;metal ion binding;protein binding	Pf00578, Pf02630, Pf13905	0.972	0.94	0.968	13010000	13230000	13300000	12650000	12440000	12870000		0.96004	0.0304158	2.981	0	30.6705	6
FALSE	High	Master Protein	B1AK88	Capping protein (Actin filament) muscle Z-line, beta, isoform CRA_d OS=Homo sapiens GN=CAPZB PE=1 SV=1	0	149.255	49.5017	21	92	21	1	301	33.76	6.43		832	CAPZB	ENSG00000077549.17	1	cell organization and biogenesis;cellular component movement;coagulation;regulation of biological process	cytoplasm;cytoskeleton;cytosol;membrane	protein binding	Pf01115	0.988	0.962	0.994	12980000	13130000	12910000	12820000	12630000	12840000		0.981292	0.0594466	337.386	0	271.641	21
FALSE	High	Master Protein	Q8WUM4	Programmed cell death 6-interacting protein OS=Homo sapiens GN=PDCD6IP PE=1 SV=1	0	272.551	53.5714	47	131	47	1	868	95.963	6.52		10015	PDCD6IP	ENSG00000170248.13	3	cell death;cell division;cell organization and biogenesis;regulation of biological process;transport	cytoplasm;cytoskeleton;cytosol;extracellular;membrane	protein binding	Pf03097, Pf08391, Pf13949	0.95	0.975	0.974	12910000	12820000	12780000	12270000	12500000	12440000		0.966243	0.0105573	41.919	0	376.315	47
FALSE	High	Master Protein	Q99436	Proteasome subunit beta type-7 OS=Homo sapiens GN=PSMB7 PE=1 SV=1	0	44.5988	30.3249	8	23	8	1	277	29.946	7.68		5695	PSMB7	ENSG00000136930.12	9	metabolic process;regulation of biological process;response to stimulus;transport	cytoplasm;cytosol;extracellular;nucleus;organelle lumen;proteasome	catalytic activity;protein binding	Pf00227, Pf12465	0.92	0.972	0.9	12870000	11740000	12260000	11830000	11410000	11030000		0.929482	0.103739	13.251	0	65.0826	8
FALSE	High	Master Protein	O75643	U5 small nuclear ribonucleoprotein 200 kDa helicase OS=Homo sapiens GN=SNRNP200 PE=1 SV=2	0	540.427	39.2322	78	257	77	1	2136	244.353	6.06		23020	SNRNP200	ENSG00000144028.14	2	cell differentiation;cell organization and biogenesis;metabolic process	membrane;nucleus;spliceosomal complex	catalytic activity;DNA binding;nucleotide binding;protein binding;RNA binding	Pf00270, Pf00271, Pf02889, Pf04851	0.969	1.01	0.974	12860000	12670000	13040000	12470000	12800000	12710000		0.984703	0.247746	14.91	1	837.365	78
FALSE	High	Master Protein	Q9UQE7	Structural maintenance of chromosomes protein 3 OS=Homo sapiens GN=SMC3 PE=1 SV=2	0	451.57	50.3698	65	192	64	1	1217	141.454	7.18		9126	SMC3	ENSG00000108055.9	10	cell division;cell organization and biogenesis;metabolic process;regulation of biological process;response to stimulus;transport	chromosome;cytoplasm;cytosol;nucleus	catalytic activity;motor activity;nucleotide binding;protein binding;transporter activity	Pf01496, Pf02463, Pf04111, Pf06470, Pf10168, Pf12128, Pf13304, Pf13476, Pf13555	0.99	0.989	0.985	12840000	12870000	12820000	12700000	12730000	12640000		0.988061	0.0135421	95.52	1	584.978	65
FALSE	High	Master Protein	O43707	Alpha-actinin-4 OS=Homo sapiens GN=ACTN4 PE=1 SV=2	0	527.764	61.6905	56	242	32	1	911	104.788	5.44		81	ACTN4	ENSG00000282844.1; ENSG00000130402.11	19; CHR_HG26_PATCH	cell organization and biogenesis;cellular component movement;regulation of biological process;response to stimulus;transport	cytoplasm;cytoskeleton;cytosol;extracellular;nucleus;organelle lumen	DNA binding;metal ion binding;protein binding;RNA binding	Pf00307, Pf00435, Pf08726, Pf11971, Pf13499	0.983	1.013	1.017	12830000	12480000	12940000	12610000	12640000	13160000		1.00418	0.825763	232.572	28	805.309	56
FALSE	High	Master Protein	P60438	50S ribosomal protein L3 OS=Escherichia coli (strain K12) GN=rplC PE=1 SV=1	0	82.9691	50.2392	13	33	13	1	209	22.23	9.91		947817	rplC; SH08_20865; SH03_20760; SH06_21065; SH04_20750; SH07_20755; SF31_21150			cell organization and biogenesis;metabolic process	cytosol;ribosome	protein binding;RNA binding;structural molecule activity	Pf00297	1.751	1.767	1.723	12830000	12640000	12830000	22470000	22330000	22110000		1.747	1.73417e-06	50.795	0	103.113	13
FALSE	High	Master Protein	P24752	Acetyl-CoA acetyltransferase, mitochondrial OS=Homo sapiens GN=ACAT1 PE=1 SV=1	0	310.053	62.7635	24	145	23	1	427	45.171	8.85		38	ACAT1	ENSG00000075239.13	11	cell organization and biogenesis;metabolic process;response to stimulus	membrane;mitochondrion;organelle lumen	catalytic activity;metal ion binding;protein binding	Pf00108, Pf00109, Pf02803	0.995	0.961	0.973	12770000	12700000	12740000	12700000	12210000	12390000		0.976184	0.165765	830.764	1	484.195	24
FALSE	High	Master Protein	A0A0C4DGV5	Zinc finger Ran-binding domain-containing protein 2 OS=Homo sapiens GN=ZRANB2 PE=1 SV=1	0	73.0201	30.5638	12	40	12	1	337	38.2	8.75		9406	ZRANB2		1	metabolic process;regulation of biological process	nucleus	metal ion binding;protein binding;RNA binding	Pf00641	0.986	0.958	0.983	12760000	12780000	12900000	12580000	12240000	12690000		0.975806	0.139176	14.849	0	104.538	12
FALSE	High	Master Protein	P04181	Ornithine aminotransferase, mitochondrial OS=Homo sapiens GN=OAT PE=1 SV=1	0	168.875	49.4305	21	86	21	1	439	48.504	7.03		4942	OAT	ENSG00000065154.11	10	cell organization and biogenesis;metabolic process	cytoplasm;mitochondrion;organelle lumen	catalytic activity;protein binding	Pf00202	0.954	0.946	0.962	12730000	12700000	12660000	12150000	12020000	12180000		0.954319	0.00276234	161.378	0	292.918	21
FALSE	High	Master Protein	P30040	Endoplasmic reticulum resident protein 29 OS=Homo sapiens GN=ERP29 PE=1 SV=4	0	61.182	37.5479	10	38	10	1	261	28.975	7.31		10961	ERP29	ENSG00000089248.6	12	metabolic process;regulation of biological process;transport	cell surface;endoplasmic reticulum;membrane;organelle lumen	catalytic activity;protein binding	Pf07749, Pf07912	0.939	1.001	0.955	12670000	12320000	12230000	11890000	12330000	11680000		0.964535	0.141325	12.895	0	115.586	10
FALSE	High	Master Protein	O75533	Splicing factor 3B subunit 1 OS=Homo sapiens GN=SF3B1 PE=1 SV=3	0	425.915	47.6994	58	176	58	1	1304	145.738	7.09		23451	SF3B1	ENSG00000115524.15	2	cell organization and biogenesis;metabolic process;regulation of biological process;response to stimulus	nucleus;spliceosomal complex	DNA binding;protein binding;receptor activity;RNA binding;signal transducer activity	Pf02161, Pf08920, Pf12815, Pf13513	0.968	0.965	0.997	12610000	12680000	12550000	12200000	12240000	12510000		0.97648	0.0780296	47.144	0	605.712	58
FALSE	High	Master Protein	Q15393	Splicing factor 3B subunit 3 OS=Homo sapiens GN=SF3B3 PE=1 SV=4	0	278.538	34.8398	39	158	39	1	1217	135.492	5.26		23450	SF3B3	ENSG00000189091.12	16	cell organization and biogenesis;metabolic process;regulation of biological process	nucleus;spliceosomal complex	protein binding;RNA binding	Pf03178, Pf10433	0.968	1.027	0.988	12580000	12050000	12620000	12180000	12370000	12460000		0.993557	0.719736	16.957	0	490.689	39
FALSE	High	Master Protein	A0A0A0MRM9	Nucleolar and coiled-body phosphoprotein 1 (Fragment) OS=Homo sapiens GN=NOLC1 PE=1 SV=1	0	155.568	25	22	102	22	1	708	74.61	9.47				ENSG00000166197.16	10			protein binding	Pf05022	1.003	0.955	0.98	12570000	12950000	12580000	12600000	12360000	12330000		0.97874	0.158571	15.788	0	320.005	22
FALSE	High	Master Protein	P10768	S-formylglutathione hydrolase OS=Homo sapiens GN=ESD PE=1 SV=2	0	112.066	46.4539	12	60	12	1	282	31.442	7.02		2098	ESD	ENSG00000139684.13	13	metabolic process	cytoplasm;organelle lumen	catalytic activity;protein binding	Pf00326, Pf00756, Pf05448, Pf12695, Pf12697	0.987	0.991	0.951	12550000	12440000	12630000	12390000	12330000	12010000		0.976342	0.112238	70.969	0	203.307	12
FALSE	High	Master Protein	P30405	Peptidyl-prolyl cis-trans isomerase F, mitochondrial OS=Homo sapiens GN=PPIF PE=1 SV=1	0	117.338	67.6329	13	95	11	1	207	22.026	9.38		10105	PPIF	ENSG00000108179.13	10	cell death;cell organization and biogenesis;metabolic process;regulation of biological process;response to stimulus	membrane;mitochondrion;organelle lumen	catalytic activity;protein binding	Pf00160	0.961	0.976	1	12460000	12570000	12720000	11970000	12260000	12720000		0.978808	0.347731	656.933	1	226.849	13
FALSE	High	Master Protein	Q7KZF4	Staphylococcal nuclease domain-containing protein 1 OS=Homo sapiens GN=SND1 PE=1 SV=1	0	321.099	49.7802	43	168	43	1	910	101.934	7.17		27044	SND1	ENSG00000197157.10	7	cell differentiation;metabolic process;regulation of biological process	cytoplasm;cytosol;membrane;mitochondrion;nucleus	catalytic activity;protein binding;RNA binding	Pf00565, Pf00567	1	0.978	1.01	12450000	12800000	12550000	12450000	12520000	12670000		0.995767	0.690197	50.468	0	525.165	43
FALSE	High	Master Protein	P03928	ATP synthase protein 8 OS=Homo sapiens GN=MT-ATP8 PE=1 SV=1	0.00045529	8.93493	29.4118	2	15	2	1	68	7.986	9.91		4509	ATP8	ENSG00000228253.1	MT	cell organization and biogenesis;metabolic process;response to stimulus;transport	membrane;mitochondrion	catalytic activity;transporter activity		1.017	0.976	1.075	12410000	12060000	12120000	12620000	11760000	13030000		1.02241	0.546326	9	0	29.5542	2
FALSE	High	Master Protein	A8MXP9	Matrin-3 OS=Homo sapiens GN=MATR3 PE=1 SV=1	0	384.883	50.3911	41	163	1	1	895	99.905	6.04				ENSG00000280987.4	5		nucleus	metal ion binding;nucleotide binding;RNA binding	Pf13893, Pf14259	1.016	0.958	1.034	12400000	13280000	12520000	12600000	12720000	12950000		1.00183	0.942565	104.372	43	529.468	41
FALSE	High	Master Protein	P62277	40S ribosomal protein S13 OS=Homo sapiens GN=RPS13 PE=1 SV=2	0	65.2055	62.9139	12	60	12	1	151	17.212	10.54		6207	RPS13	ENSG00000110700.6	11	cell organization and biogenesis;metabolic process;regulation of biological process;transport	cytosol;membrane;nucleus;ribosome	protein binding;RNA binding;structural molecule activity	Pf00312, Pf08069	1.016	1.04	0.974	12370000	12420000	12860000	12570000	12920000	12530000		1.00983	0.570456	165.81	0	157.503	12
FALSE	High	Master Protein	P07355	Annexin A2 OS=Homo sapiens GN=ANXA2 PE=1 SV=2	0	176.776	64.3068	25	98	11	1	339	38.58	7.75		302	ANXA2	ENSG00000182718.16	15	cell organization and biogenesis;metabolic process;regulation of biological process;response to stimulus;transport	cell surface;cytoplasm;cytosol;endoplasmic reticulum;endosome;extracellular;membrane;nucleus;organelle lumen	enzyme regulator activity;metal ion binding;protein binding;RNA binding	Pf00191	0.967	0.97	0.986	12360000	12410000	12330000	11960000	12040000	12150000		0.974394	0.0171441	186.382	14	333.348	25
FALSE	High	Master Protein	Q13185	Chromobox protein homolog 3 OS=Homo sapiens GN=CBX3 PE=1 SV=4	0	73.4299	48.6339	9	37	7	1	183	20.798	5.33		11335; 90416	CBX3; C15orf57; CCDC32	ENSG00000122565.18	7; 15	cell organization and biogenesis;metabolic process;regulation of biological process;response to stimulus	chromosome;membrane;nucleus	protein binding	Pf00385, Pf01393	0.956	0.951	0.955	12340000	12160000	12280000	11790000	11570000	11740000		0.954323	0.0032748	176.828	3	134.349	9
FALSE	High	Master Protein	P62266	40S ribosomal protein S23 OS=Homo sapiens GN=RPS23 PE=1 SV=3	0	56.1475	30.0699	6	34	6	1	143	15.798	10.49		6228	RPS23	ENSG00000186468.12	5	cell organization and biogenesis;metabolic process;transport	cytosol;membrane;ribosome	protein binding;RNA binding;structural molecule activity	Pf00164	0.937	0.957	0.984	12320000	12010000	12000000	11540000	11490000	11810000		0.958987	0.0265517	214.443	0	116.261	6
FALSE	High	Master Protein	P42677	40S ribosomal protein S27 OS=Homo sapiens GN=RPS27 PE=1 SV=3	0	51.2109	39.2857	4	45	2	1	84	9.455	9.45		6232	RPS27	ENSG00000177954.11	1	cell organization and biogenesis;cell proliferation;metabolic process;transport	cytosol;nucleus;ribosome	DNA binding;metal ion binding;protein binding;RNA binding;structural molecule activity	Pf01667	0.906	0.936	0.994	12290000	11160000	10380000	11130000	10440000	10310000		0.942359	0.369621	9999	0	131.972	4
FALSE	High	Master Protein	P09622	Dihydrolipoyl dehydrogenase, mitochondrial OS=Homo sapiens GN=DLD PE=1 SV=2	0	148.227	35.167	17	76	17	1	509	54.143	7.85		1738	DLD	ENSG00000091140.13	7	cellular homeostasis;metabolic process;regulation of biological process	mitochondrion;organelle lumen	catalytic activity;nucleotide binding	Pf00070, Pf00890, Pf01134, Pf02852, Pf03486, Pf07992, Pf12831, Pf13450	0.954	1.019	0.968	12210000	11640000	11910000	11650000	11870000	11520000		0.979866	0.295323	38.811	0	247.288	17
FALSE	High	Master Protein	P18206	Vinculin OS=Homo sapiens GN=VCL PE=1 SV=4	0	430.404	59.1711	63	204	63	1	1134	123.722	5.66		7414	VCL	ENSG00000035403.17	10	cell growth;cell organization and biogenesis;cellular component movement;regulation of biological process;transport	cytoplasm;cytoskeleton;cytosol;extracellular;membrane;organelle lumen	protein binding;structural molecule activity	Pf01044	0.997	0.999	0.992	12170000	12210000	12270000	12140000	12190000	12170000		0.995907	0.22321	37.114	0	651.635	63
FALSE	High	Master Protein	P58546	Myotrophin OS=Homo sapiens GN=MTPN PE=1 SV=2	0	53.5929	38.9831	5	28	5	1	118	12.887	5.52		767558; 136319	LUZP6; MTPN	ENSG00000105887.10	7	cell differentiation;cell growth;metabolic process;regulation of biological process;response to stimulus	cytoplasm;cytosol;nucleus	DNA binding;protein binding	Pf00023, Pf12796, Pf13606, Pf13637, Pf13857	0.969	1.001	0.983	12170000	11940000	12250000	11800000	11960000	12040000		0.984598	0.189931	145.78	0	102.852	5
FALSE	High	Master Protein	P63000	Ras-related C3 botulinum toxin substrate 1 OS=Homo sapiens GN=RAC1 PE=1 SV=1	0	57.2713	41.6667	9	27	5	1	192	21.436	8.5		5879	RAC1	ENSG00000136238.17	7	cell communication;cell organization and biogenesis;cell proliferation;cellular component movement;coagulation;defense response;regulation of biological process;response to stimulus;transport	cytoplasm;cytosol;membrane;nucleus	catalytic activity;nucleotide binding;protein binding;receptor activity;signal transducer activity	Pf00025, Pf00071, Pf08477	1.007	1.032	1.002	12080000	12520000	12250000	12170000	12920000	12280000		1.01411	0.560574	99	4	93.4816	9
FALSE	High	Master Protein	P61289	Proteasome activator complex subunit 3 OS=Homo sapiens GN=PSME3 PE=1 SV=1	0	131.664	43.3071	13	87	13	1	254	29.488	5.95		10197	PSME3	ENSG00000131467.10	17	cell death;metabolic process;regulation of biological process;response to stimulus;transport	cytoplasm;cytosol;membrane;nucleus;proteasome	enzyme regulator activity;protein binding	Pf02251, Pf02252	0.987	0.975	1.002	12060000	12420000	12310000	11900000	12110000	12330000		0.987768	0.41213	371.759	0	266.083	13
FALSE	High	Master Protein	A0A0A0MQU3	Ubiquitin-conjugating enzyme E2 D2 OS=Homo sapiens GN=UBE2D2 PE=1 SV=1	0	25.3548	24.4898	3	14	2	1	147	16.67	7.3				ENSG00000131508.15	5			nucleotide binding	Pf00179	0.972	0.989	1.035	12010000	11620000	11610000	11670000	11500000	12020000		0.998581	0.938271	14.849	2	47.7967	3
FALSE	High	Master Protein	P30153	Serine/threonine-protein phosphatase 2A 65 kDa regulatory subunit A alpha isoform OS=Homo sapiens GN=PPP2R1A PE=1 SV=4	0	204.361	54.8387	28	105	20	1	589	65.267	5.11		5518	PPP2R1A	ENSG00000105568.17	19	cell death;cell organization and biogenesis;metabolic process;regulation of biological process;response to stimulus	chromosome;cytoplasm;cytoskeleton;cytosol;membrane;mitochondrion;nucleus	catalytic activity;enzyme regulator activity;protein binding	Pf02985, Pf13513, Pf13646	0.95	0.99	0.961	12000000	11890000	11960000	11400000	11770000	11490000		0.966806	0.0609466	41.17	5	310.984	28
FALSE	High	Master Protein	P34897	Serine hydroxymethyltransferase, mitochondrial OS=Homo sapiens GN=SHMT2 PE=1 SV=3	0	195.628	60.3175	26	94	25	1	504	55.958	8.53		6472	SHMT2	ENSG00000182199.10	12	cell organization and biogenesis;metabolic process;regulation of biological process;response to stimulus	cytoplasm;cytoskeleton;membrane;mitochondrion;nucleus;organelle lumen	catalytic activity;protein binding	Pf00464	0.954	0.981	0.988	11940000	11980000	11890000	11390000	11760000	11750000		0.974588	0.124561	45.416	2	280.727	26
FALSE	High	Master Protein	J3QQ67	60S ribosomal protein L18 (Fragment) OS=Homo sapiens GN=RPL18 PE=1 SV=1	0	69.0262	42.1053	8	92	1	1	190	21.825	11.72				ENSG00000063177.12	19	metabolic process	cytosol;endoplasmic reticulum;ribosome	structural molecule activity	Pf00828	0.957	1.008	0.954	11940000	11570000	11730000	11420000	11660000	11200000		0.972758	0.137226	176.828	7	263.202	8
FALSE	High	Master Protein	P38919	Eukaryotic initiation factor 4A-III OS=Homo sapiens GN=EIF4A3 PE=1 SV=4	0	163.075	44.0389	21	109	17	1	411	46.841	6.73		9775	EIF4A3	ENSG00000141543.9	17	metabolic process;regulation of biological process;response to stimulus;transport	cytoplasm;cytosol;membrane;nucleus;spliceosomal complex	catalytic activity;nucleotide binding;protein binding;RNA binding	Pf00270, Pf00271	1.026	1.003	0.984	11800000	11900000	11890000	12100000	11930000	11700000		1.00393	0.730855	99	0	343.875	21
FALSE	High	Master Protein	P54727	UV excision repair protein RAD23 homolog B OS=Homo sapiens GN=RAD23B PE=1 SV=1	0	99.565	48.6553	14	40	12	1	409	43.145	4.84		5887	RAD23B	ENSG00000119318.12	9	cell organization and biogenesis;metabolic process;regulation of biological process;response to stimulus	cytoplasm;cytosol;nucleus;proteasome	DNA binding;protein binding	Pf00240, Pf00627, Pf09280, Pf11976, Pf13881	0.964	1.005	0.98	11780000	10980000	11320000	11350000	11030000	11090000		0.982101	0.484402	53.117	1	133.423	14
FALSE	High	Master Protein	A0A0J9YVP6	Poly(U)-binding-splicing factor PUF60 (Fragment) OS=Homo sapiens GN=PUF60 PE=1 SV=1	0	204.627	51.4981	22	96	22	1	534	57.362	5.35				ENSG00000274081.4	CHR_HSCHR8_3_CTG7			nucleotide binding;RNA binding	Pf00076, Pf13893, Pf14259	0.974	0.996	0.992	11770000	11490000	11750000	11470000	11450000	11660000		0.987718	0.276241	69.17	0	337.331	22
FALSE	High	Master Protein	P55786	Puromycin-sensitive aminopeptidase OS=Homo sapiens GN=NPEPPS PE=1 SV=2	0	253.056	40.2612	36	131	36	1	919	103.211	5.72		9520	NPEPPS	ENSG00000141279.15	17	metabolic process;response to stimulus	cytoplasm;cytosol;nucleus	catalytic activity;metal ion binding	Pf01433, Pf11838, Pf13485	0.97	0.975	0.954	11690000	11440000	11870000	11340000	11160000	11330000		0.966571	0.0704787	25.303	0	391.428	36
FALSE	High	Master Protein	Q92499	ATP-dependent RNA helicase DDX1 OS=Homo sapiens GN=DDX1 PE=1 SV=2	0	279.967	60	39	128	39	1	740	82.38	7.23		1653	DDX1	ENSG00000079785.14	2	cell organization and biogenesis;development;metabolic process;regulation of biological process;response to stimulus	cytoplasm;cytosol;membrane;nucleus	catalytic activity;DNA binding;nucleotide binding;protein binding;RNA binding	Pf00270, Pf00271, Pf00622	0.998	1.021	1.01	11650000	11600000	11640000	11630000	11840000	11750000		1.00946	0.20732	66.494	0	418.12	39
FALSE	High	Master Protein	P00492	Hypoxanthine-guanine phosphoribosyltransferase OS=Homo sapiens GN=HPRT1 PE=1 SV=2	0	87.6141	43.578	8	49	7	1	218	24.564	6.68		3251	HPRT1	ENSG00000165704.14	X	cell differentiation;cell organization and biogenesis;cell proliferation;metabolic process;regulation of biological process;response to stimulus	cytoplasm;cytosol	catalytic activity;metal ion binding;nucleotide binding;protein binding	Pf00156, Pf15610	0.962	0.986	0.989	11650000	11340000	11340000	11210000	11180000	11220000		0.979027	0.144106	48.239	1	146.495	8
FALSE	High	Master Protein	P35268	60S ribosomal protein L22 OS=Homo sapiens GN=RPL22 PE=1 SV=2	0	37.8083	42.1875	6	28	6	1	128	14.778	9.19		6146	RPL22	ENSG00000116251.9	1	cell differentiation;cell organization and biogenesis;metabolic process;transport	cytoplasm;cytosol;nucleus;ribosome	protein binding;RNA binding;structural molecule activity	Pf01776	0.978	0.981	0.973	11640000	11870000	11920000	11380000	11650000	11600000		0.97742	0.0898008	315.228	0	96.6835	6
FALSE	High	Master Protein	Q15029	116 kDa U5 small nuclear ribonucleoprotein component OS=Homo sapiens GN=EFTUD2 PE=1 SV=1	0	288.381	49.2798	41	143	40	1	972	109.366	5		9343	EFTUD2	ENSG00000108883.12	17	metabolic process;response to stimulus	cytosol;membrane;nucleus;spliceosomal complex	catalytic activity;nucleotide binding;protein binding;RNA binding	Pf00009, Pf00679, Pf03144, Pf03764, Pf14492	0.998	0.999	0.995	11630000	11620000	11490000	11610000	11610000	11440000		0.997697	0.732252	22.714	0	451.061	41
FALSE	High	Master Protein	P26639	Threonine--tRNA ligase, cytoplasmic OS=Homo sapiens GN=TARS PE=1 SV=3	0	262.988	45.2282	33	151	31	1	723	83.382	6.67		6897	TARS	ENSG00000113407.13	5	metabolic process	cytoplasm;cytoskeleton;cytosol	catalytic activity;nucleotide binding;protein binding	Pf00587, Pf02824, Pf03129, Pf07973	0.982	1.004	0.977	11630000	11590000	11890000	11420000	11630000	11620000		0.987468	0.281741	40.081	2	489.915	33
FALSE	High	Master Protein	Q15459	Splicing factor 3A subunit 1 OS=Homo sapiens GN=SF3A1 PE=1 SV=1	0	247.882	40.3531	32	100	32	1	793	88.831	5.22		10291	SF3A1	ENSG00000099995.18	22	cell organization and biogenesis;metabolic process;regulation of biological process	nucleus;spliceosomal complex	protein binding;RNA binding	Pf00240, Pf01805, Pf12230, Pf14560	0.975	0.975	0.961	11610000	11490000	11710000	11320000	11200000	11260000		0.970411	0.0166335	50.348	0	341.709	32
FALSE	High	Master Protein	Q53GQ0	Very-long-chain 3-oxoacyl-CoA reductase OS=Homo sapiens GN=HSD17B12 PE=1 SV=2	0	68.2872	33.3333	11	28	11	1	312	34.302	9.32		51144	HSD17B12	ENSG00000149084.12	11	cell organization and biogenesis;metabolic process;regulation of biological process	endoplasmic reticulum;membrane	catalytic activity;protein binding	Pf00106, Pf03435, Pf08659, Pf13460, Pf13561	1.01	0.955	0.929	11600000	11460000	11760000	11720000	10950000	10920000		0.964675	0.25376	16.783	0	74.2466	11
FALSE	High	Master Protein	P23434	Glycine cleavage system H protein, mitochondrial OS=Homo sapiens GN=GCSH PE=1 SV=2	0.000150807	11.4873	17.341	2	9	2	1	173	18.873	4.88		2653	GCSH	ENSG00000140905.10	16	metabolic process	mitochondrion;organelle lumen	catalytic activity;protein binding	Pf01597	0.947	0.909	0.961	11590000	12250000	11420000	10970000	11130000	10970000		0.93789	0.0963326	1.371	0	29.9395	2
FALSE	High	Master Protein	O43143	Pre-mRNA-splicing factor ATP-dependent RNA helicase DHX15 OS=Homo sapiens GN=DHX15 PE=1 SV=2	0	264.133	43.6478	41	138	40	1	795	90.875	7.46		1665	DHX15	ENSG00000109606.12	4	metabolic process;response to stimulus	cytoplasm;nucleus;spliceosomal complex	catalytic activity;nucleotide binding;protein binding;RNA binding	Pf00270, Pf00271, Pf04408, Pf07717, Pf13401	1.001	0.98	0.991	11530000	11600000	11690000	11540000	11370000	11580000		0.990523	0.244436	56.029	1	445.881	41
FALSE	High	Master Protein	Q12931	Heat shock protein 75 kDa, mitochondrial OS=Homo sapiens GN=TRAP1 PE=1 SV=3	0	244.056	46.0227	31	199	30	1	704	80.06	8.21		10131	TRAP1	ENSG00000126602.10	16	metabolic process;regulation of biological process;response to stimulus	membrane;mitochondrion;organelle lumen	nucleotide binding;protein binding;RNA binding	Pf00183, Pf02518, Pf13589	1.004	1.006	1.004	11500000	11420000	11530000	11550000	11490000	11580000		1.00493	0.253097	54.41	0	560.463	31
FALSE	High	Master Protein	P26038	Moesin OS=Homo sapiens GN=MSN PE=1 SV=3	0	229.865	45.9272	37	121	24	1	577	67.778	6.4		4478	MSN	ENSG00000147065.16	X	cell differentiation;cell organization and biogenesis;cell proliferation;cellular component movement;regulation of biological process;response to stimulus	cell surface;cytoplasm;cytoskeleton;cytosol;membrane;nucleus	protein binding;RNA binding;structural molecule activity	Pf00373, Pf00769, Pf09379, Pf09380	0.997	0.983	1.007	11440000	11450000	11400000	11410000	11260000	11490000		0.996209	0.589468	147.398	13	333.199	37
FALSE	High	Master Protein	A0A0A0MTI5	Acyl-CoA-binding protein OS=Homo sapiens GN=DBI PE=1 SV=1	0	62.4957	39.8601	6	25	6	1	143	15.949	5.05				ENSG00000155368.16	2				Pf00887	1.034	1.102	0.959	11380000	10200000	11640000	11770000	11240000	11160000		1.0286	0.562954	137.95	0	74.5975	6
FALSE	High	Master Protein	P61019	Ras-related protein Rab-2A OS=Homo sapiens GN=RAB2A PE=1 SV=1	0	111.357	53.7736	11	42	4	1	212	23.531	6.54		5862	RAB2A	ENSG00000104388.14	8	cell organization and biogenesis;metabolic process;regulation of biological process;response to stimulus;transport	cytosol;endoplasmic reticulum;Golgi;membrane;nucleus	catalytic activity;nucleotide binding;protein binding	Pf00009, Pf00025, Pf00071, Pf01926, Pf04670, Pf08477	0.951	0.998	1.003	11360000	11390000	11330000	10810000	11360000	11360000		0.983862	0.422783	70.969	0	149.692	11
FALSE	High	Master Protein	P49321	Nuclear autoantigenic sperm protein OS=Homo sapiens GN=NASP PE=1 SV=2	0	316.715	61.2944	41	145	40	1	788	85.186	4.3		4678	NASP	ENSG00000132780.16	1	cell organization and biogenesis;cell proliferation;metabolic process;response to stimulus;transport	cytoplasm;nucleus	protein binding	Pf00515, Pf10516, Pf13414, Pf13424	0.957	0.966	0.97	11340000	11350000	11200000	10850000	10970000	10860000		0.964296	0.00338861	42.288	0	449.696	41
FALSE	High	Master Protein	P62318	Small nuclear ribonucleoprotein Sm D3 OS=Homo sapiens GN=SNRPD3 PE=1 SV=1	0	43.1269	47.619	4	32	4	1	126	13.907	10.32		6634	SNRPD3	ENSG00000100028.11	22	cell organization and biogenesis;metabolic process;transport	cytoplasm;cytosol;nucleus;spliceosomal complex	protein binding;RNA binding	Pf01423	0.95	0.981	0.99	11340000	11370000	11000000	10770000	11150000	10890000		0.973302	0.14023	45.416	0	95.6928	4
FALSE	High	Master Protein	P12236	ADP/ATP translocase 3 OS=Homo sapiens GN=SLC25A6 PE=1 SV=4	0	111.86	44.2953	15	130	1	1	298	32.845	9.74		293	SLC25A6	ENSG00000169100.13	X|Y; X	cell death;cell organization and biogenesis;regulation of biological process;response to stimulus;transport	membrane;mitochondrion;nucleus	protein binding;transporter activity	Pf00153	0.94	0.963	0.988	11330000	11080000	10940000	10660000	10670000	10810000		0.963718	0.0549858	49.119	0	380.44	15
FALSE	High	Master Protein	Q99613	Eukaryotic translation initiation factor 3 subunit C OS=Homo sapiens GN=EIF3C PE=1 SV=1	0	218.323	33.6254	31	116	31	1	913	105.278	5.68		8663	EIF3C	ENSG00000184110.14	16	cell organization and biogenesis;metabolic process;regulation of biological process	cytoplasm;cytosol	protein binding;RNA binding	Pf01399, Pf05470	0.987	0.983	0.995	11290000	11510000	11530000	11150000	11320000	11470000		0.98864	0.342287	20.544	0	363.759	31
FALSE	High	Master Protein	P14868	Aspartate--tRNA ligase, cytoplasmic OS=Homo sapiens GN=DARS PE=1 SV=2	0	204.681	57.8842	27	120	19	1	501	57.1	6.55		1615	DARS	ENSG00000115866.10	2	cell organization and biogenesis;metabolic process	cytoplasm;cytosol;membrane	catalytic activity;nucleotide binding;protein binding;RNA binding	Pf00152, Pf01336	0.992	1.007	1.024	11280000	11350000	11360000	11200000	11430000	11630000		1.00794	0.546402	29.654	7	354.406	27
FALSE	High	Master Protein	Q12905	Interleukin enhancer-binding factor 2 OS=Homo sapiens GN=ILF2 PE=1 SV=2	0	119.497	35.8974	12	72	12	1	390	43.035	5.26		3608	ILF2	ENSG00000143621.16	1	metabolic process;regulation of biological process;response to stimulus;transport	cytoplasm;extracellular;membrane;nucleus;organelle lumen	catalytic activity;DNA binding;nucleotide binding;protein binding;RNA binding	Pf07528	0.944	0.986	1.013	11250000	10940000	10870000	10610000	10790000	11010000		0.980339	0.257823	22.357	0	242.371	12
FALSE	High	Master Protein	P0ACF4	DNA-binding protein HU-beta OS=Escherichia coli (strain K12) GN=hupB PE=1 SV=1	0	27.0381	41.1111	4	14	4	1	90	9.22	9.7		949095	hupB; SH08_06010; SH03_06000; SH06_06305; SH04_05990; SH07_05995; SF31_06305			cell organization and biogenesis;metabolic process;regulation of biological process	cytosol	DNA binding;protein binding	Pf00216	1.65	1.707	1.642	11230000	11150000	11310000	18520000	19040000	18570000		1.66607	0.000204177	55.234	0	35.3454	4
FALSE	High	Master Protein	Q9Y266	Nuclear migration protein nudC OS=Homo sapiens GN=NUDC PE=1 SV=1	0	197.796	61.9335	23	103	23	1	331	38.219	5.38		10726	NUDC	ENSG00000090273.13	1	cell division;cell organization and biogenesis;cell proliferation;development;metabolic process	cytoplasm;cytoskeleton;cytosol;nucleus	protein binding	Pf04969, Pf14050	0.98	1.012	1.013	11200000	10870000	11110000	10970000	11000000	11250000		1.00121	0.924782	371.759	0	333.476	23
FALSE	High	Master Protein	O00299	Chloride intracellular channel protein 1 OS=Homo sapiens GN=CLIC1 PE=1 SV=4	0	140.473	73.444	13	70	13	1	241	26.906	5.17		1192	CLIC1	ENSG00000213719.8; ENSG00000206394.8; ENSG00000230685.6; ENSG00000226248.6; ENSG00000223639.6; ENSG00000226651.6; ENSG00000226417.6	6; CHR_HSCHR6_MHC_QBL_CTG1; CHR_HSCHR6_MHC_COX_CTG1; CHR_HSCHR6_MHC_DBB_CTG1; CHR_HSCHR6_MHC_SSTO_CTG1; CHR_HSCHR6_MHC_MANN_CTG1; CHR_HSCHR6_MHC_MCF_CTG1	metabolic process;regulation of biological process;response to stimulus;transport	cytoplasm;membrane;mitochondrion;nucleus	catalytic activity;protein binding;transporter activity	Pf00043, Pf13409, Pf13410, Pf13417	0.991	1.001	0.951	11160000	11160000	11160000	11060000	11170000	10610000		0.980884	0.339117	72.564	0	216.639	13
FALSE	High	Master Protein	P49720	Proteasome subunit beta type-3 OS=Homo sapiens GN=PSMB3 PE=1 SV=2	0	73.0913	40.4878	10	34	10	1	205	22.933	6.55		5691	PSMB3	ENSG00000275903.2; ENSG00000277791.4	17; CHR_HSCHR17_7_CTG4	metabolic process;regulation of biological process;response to stimulus;transport	cytoplasm;cytosol;nucleus;proteasome	catalytic activity;protein binding	Pf00227	1.017	0.996	1.022	11160000	11570000	11180000	11350000	11520000	11430000		1.0115	0.439144	165.81	0	92.3666	10
FALSE	High	Master Protein	A0A087WUZ3	Spectrin beta chain, non-erythrocytic 1 OS=Homo sapiens GN=SPTBN1 PE=1 SV=1	0	699.963	51.3525	104	260	95	1	2366	274.659	5.57				ENSG00000115306.15	2	cell organization and biogenesis;regulation of biological process	cytoplasm;cytoskeleton	protein binding;structural molecule activity	Pf00169, Pf00307, Pf00435, Pf11971, Pf12128, Pf15410	0.994	0.964	1.005	11150000	11380000	11050000	11090000	10970000	11110000		0.98779	0.298164	18.307	6	831.259	104
FALSE	High	Master Protein	E7EUU4	Eukaryotic translation initiation factor 4 gamma 1 OS=Homo sapiens GN=EIF4G1 PE=1 SV=1	0	428.476	36.7949	57	229	51	1	1560	171.535	5.31		1981	EIF4G1	ENSG00000114867.20	3	cell organization and biogenesis;defense response;metabolic process;regulation of biological process;response to stimulus	cytoplasm;cytosol;membrane;nucleus	nucleotide binding;protein binding;RNA binding;structural molecule activity	Pf00566, Pf02020, Pf02847, Pf02854	0.989	0.987	0.978	11120000	11060000	11180000	10990000	10920000	10930000		0.984412	0.0190402	62.096	9	632.075	57
FALSE	High	Master Protein	P00374	Dihydrofolate reductase OS=Homo sapiens GN=DHFR PE=1 SV=2	0	73.2877	57.754	12	40	12	1	187	21.439	7.42		1719; 573971	DHFR; DHFRP1	ENSG00000228716.6	5; 18	cell organization and biogenesis;metabolic process;regulation of biological process;response to stimulus	cytoplasm;cytosol;mitochondrion	catalytic activity;nucleotide binding;protein binding;RNA binding;translation regulator activity	Pf00186	0.996	0.953	0.933	11120000	11270000	11530000	11080000	10740000	10760000		0.960495	0.0520349	202.092	0	120.117	12
FALSE	High	Master Protein	Q00688	Peptidyl-prolyl cis-trans isomerase FKBP3 OS=Homo sapiens GN=FKBP3 PE=1 SV=1	0	99.0442	42.4107	11	43	11	1	224	25.161	9.28		2287	FKBP3	ENSG00000100442.10	14	metabolic process	cytoplasm;nucleus	catalytic activity;protein binding;receptor activity;RNA binding	Pf00254	1.025	1.008	1.003	11110000	11370000	11480000	11390000	11460000	11510000		1.01178	0.348917	81.54	0	137.646	11
FALSE	High	Master Protein	P0A9X9	Cold shock protein CspA OS=Escherichia coli (strain K12) GN=cspA PE=1 SV=2	0.000328577	9.88762	71.4286	4	4	4	1	70	7.399	5.95		23335706; 948070; 31656244	CFNIH1_RS05335; cspA; AL524_RS02095; SH08_22110; SH03_22005; SH06_22310; SH04_21995; SH07_22000; SF31_22390			metabolic process;regulation of biological process;response to stimulus	cytoplasm;cytosol	DNA binding;RNA binding	Pf00313, Pf08206	1.748	1.623	1.724	11110000	12080000	12200000	19430000	19610000	21030000		1.69737	0.000371854	5.31	0	10.2691	4
FALSE	High	Master Protein	P16949	Stathmin OS=Homo sapiens GN=STMN1 PE=1 SV=3	0	76.6936	62.4161	12	73	11	1	149	17.292	5.97		3925	STMN1	ENSG00000117632.22	1	cell differentiation;cell organization and biogenesis;development;regulation of biological process;response to stimulus	cytoplasm;cytoskeleton;cytosol;membrane	protein binding;signal transducer activity	Pf00836, Pf09726	0.996	1.002	1	11070000	11160000	10890000	11020000	11180000	10890000		0.999094	0.935161	358.381	1	230.289	12
FALSE	High	Master Protein	E9PM82	Activating signal cointegrator 1 complex subunit 1 (Fragment) OS=Homo sapiens GN=ASCC1 PE=1 SV=1	0.00045529	8.75537	25	4	5	1	1	124	14.194	7.34				ENSG00000138303.17	10			RNA binding	Pf00013, Pf10469, Pf13014	1.005	0.954	1.009	11050000	11180000	10900000	11100000	10660000	10990000		0.98853	0.468434	2.728	0	12.9049	4
FALSE	High	Master Protein	Q9Y4L1	Hypoxia up-regulated protein 1 OS=Homo sapiens GN=HYOU1 PE=1 SV=1	0	287.655	46.6466	40	130	30	1	999	111.266	5.22		10525	HYOU1	ENSG00000280682.2; ENSG00000149428.18	11; CHR_HG2217_PATCH	regulation of biological process;response to stimulus;transport	endoplasmic reticulum;extracellular;membrane;organelle lumen	nucleotide binding;protein binding	Pf00012	0.977	0.968	0.966	11020000	10800000	10710000	10760000	10450000	10350000		0.970181	0.109297	16.783	13	414.157	40
FALSE	High	Master Protein	P54136	Arginine--tRNA ligase, cytoplasmic OS=Homo sapiens GN=RARS PE=1 SV=2	0	310.418	63.6364	43	147	42	1	660	75.331	6.68		5917	RARS	ENSG00000113643.8	5	metabolic process	cytoplasm;cytosol;membrane;mitochondrion;nucleus	catalytic activity;nucleotide binding;protein binding;RNA binding	Pf00750, Pf03485, Pf05746	0.986	0.997	0.972	10980000	11060000	11260000	10830000	11020000	10950000		0.984985	0.181574	125.638	2	496.009	43
FALSE	High	Master Protein	O14980	Exportin-1 OS=Homo sapiens GN=XPO1 PE=1 SV=1	0	287.455	42.6704	39	150	39	1	1071	123.306	6.06		7514	XPO1	ENSG00000082898.16	2	cell organization and biogenesis;regulation of biological process;response to stimulus;transport	chromosome;cytoplasm;cytosol;membrane;nucleus	protein binding;RNA binding;transporter activity	Pf03810, Pf08389, Pf08767	0.982	0.992	0.969	10970000	10880000	11130000	10770000	10790000	10780000		0.980594	0.0992015	38.137	0	475.019	39
FALSE	High	Master Protein	Q9P0M6	Core histone macro-H2A.2 OS=Homo sapiens GN=H2AFY2 PE=1 SV=3	0	137.805	54.8387	22	64	21	1	372	40.033	9.69		55506	H2AFY2	ENSG00000099284.13	10	cell organization and biogenesis;regulation of biological process	chromosome;nucleus	DNA binding;protein binding	Pf00125, Pf01661	0.942	1.016	0.963	10930000	10590000	10410000	10290000	10760000	10020000		0.973066	0.345817	77.476	1	218.052	22
FALSE	High	Master Protein	P99999	Cytochrome c OS=Homo sapiens GN=CYCS PE=1 SV=2	0	37.3961	39.0476	5	27	4	1	105	11.741	9.57		54205	CYCS	ENSG00000172115.8	7	cell death;cell organization and biogenesis;metabolic process;regulation of biological process;response to stimulus;transport	cytosol;membrane;mitochondrion;nucleus	catalytic activity;metal ion binding;protein binding	Pf00034, Pf13442, Pf14495	0.971	0.957	1.028	10910000	11060000	10760000	10600000	10580000	11060000		0.985029	0.42674	67.129	2	87.0028	5
FALSE	High	Master Protein	P27708	CAD protein OS=Homo sapiens GN=CAD PE=1 SV=3	0	431.66	35.191	63	191	62	1	2225	242.829	6.46		790	CAD	ENSG00000084774.13	2	metabolic process;response to stimulus;transport	cytoplasm;cytosol;membrane;nucleus	catalytic activity;metal ion binding;nucleotide binding;protein binding	Pf00117, Pf00185, Pf00289, Pf00988, Pf01979, Pf02142, Pf02222, Pf02729, Pf02786, Pf02787, Pf07478, Pf07722, Pf13147, Pf13535, Pf13594, Pf15632	0.982	1.002	0.986	10890000	10810000	10890000	10700000	10830000	10740000		0.990181	0.0929553	9.44	1	645.716	63
FALSE	High	Master Protein	P61221	ATP-binding cassette sub-family E member 1 OS=Homo sapiens GN=ABCE1 PE=1 SV=1	0	173.595	39.7329	22	82	16	1	599	67.271	8.34		6059	ABCE1	ENSG00000164163.10	4	cell organization and biogenesis;metabolic process;regulation of biological process;transport	cytoplasm;cytosol;membrane;mitochondrion;organelle lumen	catalytic activity;enzyme regulator activity;metal ion binding;nucleotide binding;protein binding	Pf00005, Pf04068, Pf13304, Pf13671	0.992	0.956	0.966	10880000	10980000	11130000	10790000	10500000	10750000		0.971203	0.0555004	31.819	5	264.026	22
FALSE	High	Master Protein	P14927	Cytochrome b-c1 complex subunit 7 OS=Homo sapiens GN=UQCRB PE=1 SV=2	0	56.2415	57.6577	9	27	9	1	111	13.522	8.78		7381	UQCRB	ENSG00000156467.9	8	cell organization and biogenesis;metabolic process;transport	membrane;mitochondrion	catalytic activity;protein binding;transporter activity	Pf02271	0.965	0.975	1.039	10830000	10330000	10330000	10450000	10080000	10730000		0.992696	0.775834	680.292	0	90.707	9
FALSE	High	Master Protein	O75915	PRA1 family protein 3 OS=Homo sapiens GN=ARL6IP5 PE=1 SV=1	0	19.5106	23.9362	5	12	5	1	188	21.6	9.77		10550	ARL6IP5	ENSG00000144746.6	3	regulation of biological process;response to stimulus;transport	cytoplasm;cytoskeleton;endoplasmic reticulum;membrane	protein binding	Pf02990, Pf03208	0.983	0.987	0.963	10810000	10820000	10950000	10630000	10680000	10540000		0.977594	0.0164992	6.499	0	33.1269	5
FALSE	High	Master Protein	P62875	DNA-directed RNA polymerases I, II, and III subunit RPABC5 OS=Homo sapiens GN=POLR2L PE=1 SV=1	0.000328577	10.6087	29.8507	2	6	2	1	67	7.64	7.77		5441	POLR2L	ENSG00000177700.5	11	metabolic process;regulation of biological process;response to stimulus	cytosol;nucleus	catalytic activity;DNA binding;metal ion binding;protein binding	Pf01194	1.011	0.974	1.05	10790000	11130000	11020000	10920000	10850000	11570000		1.01214	0.634244	20.544	0	18.335	2
FALSE	High	Master Protein	Q08945	FACT complex subunit SSRP1 OS=Homo sapiens GN=SSRP1 PE=1 SV=1	0	169.87	35.543	25	88	25	1	709	81.024	6.87		6749	SSRP1	ENSG00000149136.8	11	metabolic process;regulation of biological process;response to stimulus	chromosome;nucleus	DNA binding;protein binding;RNA binding	Pf00505, Pf03531, Pf08512, Pf09011	1.024	0.967	0.965	10750000	11350000	11180000	11010000	10980000	10780000		0.984675	0.450416	27.289	0	284.259	25
FALSE	High	Master Protein	P52292	Importin subunit alpha-1 OS=Homo sapiens GN=KPNA2 PE=1 SV=1	0	167.358	34.7826	15	98	15	1	529	57.826	5.4		3838	KPNA2	ENSG00000182481.8	17	metabolic process;regulation of biological process;transport	cytoplasm;cytosol;membrane;nucleus	protein binding;RNA binding;transporter activity	Pf00514, Pf01749, Pf13513, Pf13646	0.979	0.998	0.962	10700000	10910000	10880000	10480000	10890000	10460000		0.979686	0.25509	22.714	0	358.601	15
FALSE	High	Master Protein	Q15370	Transcription elongation factor B polypeptide 2 OS=Homo sapiens GN=TCEB2 PE=1 SV=1	0	38.3339	52.5424	7	25	7	1	118	13.125	4.88		6923	TCEB2; ELOB	ENSG00000103363.14	16	cell organization and biogenesis;metabolic process;regulation of biological process;response to stimulus	cytosol;nucleus	protein binding	Pf00240	0.966	0.942	0.944	10610000	10910000	10650000	10260000	10280000	10060000		0.951197	0.0133053	30.623	0	66.6781	7
FALSE	High	Master Protein	Q9NPA8	Transcription and mRNA export factor ENY2 OS=Homo sapiens GN=ENY2 PE=1 SV=1	0	21.2168	39.604	5	11	5	1	101	11.521	9.33		56943	ENY2	ENSG00000120533.12	8	cell organization and biogenesis;metabolic process;regulation of biological process;transport	mitochondrion;nucleus		Pf10163	0.959	0.92	1.02	10540000	10800000	10020000	10110000	9935000	10220000		0.965083	0.247983	24.119	0	32.5907	5
FALSE	High	Master Protein	Q8IV08	Phospholipase D3 OS=Homo sapiens GN=PLD3 PE=1 SV=1	0	45.5287	15.5102	7	20	7	1	490	54.671	6.47		23646	PLD3	ENSG00000105223.19	19	metabolic process	endoplasmic reticulum;membrane	catalytic activity;protein binding	Pf00614, Pf13091, Pf13918	0.975	0.993	0.994	10520000	10860000	10920000	10260000	10790000	10860000		0.987926	0.601541	3.281	0	68.9295	7
FALSE	High	Master Protein	Q13428	Treacle protein OS=Homo sapiens GN=TCOF1 PE=1 SV=3	0	316.861	33.0645	45	121	5	1	1488	152.015	9.04		6949	TCOF1	ENSG00000070814.17	5	cell organization and biogenesis;regulation of biological process;transport	cytosol;nucleus	protein binding;RNA binding;transporter activity	Pf03546	1.005	0.992	0.934	10490000	10390000	10290000	10550000	10310000	9607000		0.977446	0.496596	13.081	36	380.991	45
FALSE	High	Master Protein	P78347	General transcription factor II-I OS=Homo sapiens GN=GTF2I PE=1 SV=2	0	263.882	41.7836	41	121	41	1	998	112.346	6.39		2969	GTF2I	ENSG00000263001.5	7	cellular homeostasis;metabolic process;regulation of biological process;response to stimulus	cytoplasm;membrane;nucleus	DNA binding;protein binding	Pf02946	0.997	0.965	0.98	10480000	10740000	10630000	10440000	10360000	10420000		0.98022	0.0969147	29.917	0	397.598	41
FALSE	High	Master Protein	P0DN79	Cystathionine beta-synthase-like protein OS=Homo sapiens GN=CBSL PE=1 SV=1	0	120.796	41.0163	21	68	21	1	551	60.548	6.65		875; 102724560	CBS; LOC102724560; CBSL	ENSG00000160200.17; ENSG00000274276.4	21	cell communication;metabolic process;response to stimulus	cytoplasm;cytosol;nucleus	catalytic activity;metal ion binding;protein binding	Pf00291, Pf00571	0.967	0.965	1.005	10480000	10340000	10340000	10140000	9982000	10390000		0.979204	0.202814	19.962	0	205.08	21
FALSE	High	Master Protein	P51858	Hepatoma-derived growth factor OS=Homo sapiens GN=HDGF PE=1 SV=1	0	151.174	72.0833	21	75	20	1	240	26.772	4.73		3068	HDGF	ENSG00000143321.18	1	cell proliferation;metabolic process;regulation of biological process;response to stimulus	cytoplasm;nucleus	DNA binding;nucleotide binding;protein binding;RNA binding	Pf00855	0.987	0.974	1.011	10480000	10850000	10650000	10340000	10580000	10770000		0.990932	0.58803	272.842	0	242.306	21
FALSE	High	Master Protein	P0A910	Outer membrane protein A OS=Escherichia coli (strain K12) GN=ompA PE=1 SV=1	0	159.438	53.1792	17	108	17	1	346	37.178	6.42		945571	ompA; SH08_08680; SH03_08680; SH06_08985; SH04_08670; SH07_08675; SF31_08985			conjugation;response to stimulus;transport	membrane	protein binding;structural molecule activity;transporter activity	Pf00691, Pf01389, Pf13505	1.754	1.936	1.833	10480000	9780000	10130000	18380000	18930000	18570000		1.83876	8.05666e-06	188.574	0	329.919	17
FALSE	High	Master Protein	Q15149	Plectin OS=Homo sapiens GN=PLEC PE=1 SV=3	0	896.424	44.1076	189	320	166	1	4684	531.466	5.96		5339	PLEC	ENSG00000178209.14	8	cell organization and biogenesis	cytoplasm;cytoskeleton;cytosol;membrane	protein binding;RNA binding;structural molecule activity	Pf00307, Pf00681, Pf03501, Pf07812	0.964	0.986	0.992	10460000	10510000	10400000	10090000	10360000	10310000		0.980555	0.120479	6.261	19	996.166	189
FALSE	High	Master Protein	O60506	Heterogeneous nuclear ribonucleoprotein Q OS=Homo sapiens GN=SYNCRIP PE=1 SV=2	0	238.589	52.9695	30	147	5	1	623	69.56	8.59		10492	SYNCRIP	ENSG00000135316.17	6	cell differentiation;metabolic process;regulation of biological process;response to stimulus	cytoplasm;endoplasmic reticulum;membrane;nucleus;spliceosomal complex	nucleotide binding;protein binding;RNA binding	Pf00076, Pf13893, Pf14259	0.976	1.018	0.957	10460000	9884000	10780000	10220000	10060000	10320000		0.983164	0.579333	64.793	17	408.54	30
FALSE	High	Master Protein	P51991	Heterogeneous nuclear ribonucleoprotein A3 OS=Homo sapiens GN=HNRNPA3 PE=1 SV=2	0	227.734	44.4444	21	186	18	1	378	39.571	9.01		220988	HNRNPA3	ENSG00000170144.20	2	metabolic process;transport	cytoplasm;nucleus;spliceosomal complex	nucleotide binding;protein binding;RNA binding;transporter activity	Pf00076, Pf13893, Pf14259	1.06	1.001	1.084	10450000	11540000	11190000	11080000	11550000	12120000		1.04732	0.300376	500.187	0	549.536	21
FALSE	High	Master Protein	Q9BVA1	Tubulin beta-2B chain OS=Homo sapiens GN=TUBB2B PE=1 SV=1	0	384.031	61.3483	25	626	2	1	445	49.921	4.89		347733	TUBB2B	ENSG00000137285.9	6	cell organization and biogenesis;cellular component movement;regulation of biological process	cytoplasm;cytoskeleton;nucleus	catalytic activity;nucleotide binding;protein binding;structural molecule activity	Pf00091, Pf03953, Pf10644	1.015	1.028	1.022	10430000	10010000	10290000	10590000	10290000	10520000		1.0218	0.224658	29934.8	0	1691.98	25
FALSE	High	Master Protein	Q5T4U5	Acyl-Coenzyme A dehydrogenase, C-4 to C-12 straight chain, isoform CRA_a OS=Homo sapiens GN=ACADM PE=1 SV=1	0	107.88	33.7004	18	55	18	1	454	50.238	7.8		34	ACADM	ENSG00000117054.13	1	cell differentiation;metabolic process;regulation of biological process;response to stimulus	mitochondrion;nucleus;organelle lumen	catalytic activity;nucleotide binding;protein binding	Pf00441, Pf02770, Pf02771, Pf08028, Pf11794	1.026	0.993	0.989	10410000	10490000	10730000	10680000	10420000	10610000		1.00253	0.840184	32.405	0	175.282	18
FALSE	High	Master Protein	P54709	Sodium/potassium-transporting ATPase subunit beta-3 OS=Homo sapiens GN=ATP1B3 PE=1 SV=1	0	73.9548	30.4659	9	30	9	1	279	31.492	8.35		483	ATP1B3	ENSG00000069849.10	3	cell organization and biogenesis;cellular component movement;cellular homeostasis;regulation of biological process;transport	cytoplasm;membrane	catalytic activity;enzyme regulator activity;protein binding;transporter activity	Pf00287	0.988	0.979	0.979	10390000	10490000	10760000	10270000	10270000	10540000		0.982301	0.263083	21.758	0	104.54	9
FALSE	High	Master Protein	O60264	SWI/SNF-related matrix-associated actin-dependent regulator of chromatin subfamily A member 5 OS=Homo sapiens GN=SMARCA5 PE=1 SV=1	0	290.899	39.4487	48	126	33	1	1052	121.828	8.09		8467	SMARCA5	ENSG00000153147.5	4	cell organization and biogenesis;metabolic process;regulation of biological process;response to stimulus	chromosome;nucleus	catalytic activity;DNA binding;nucleotide binding;protein binding	Pf00176, Pf00270, Pf00271, Pf04851, Pf09110, Pf09111, Pf11496	0.991	0.99	0.982	10380000	10260000	10380000	10290000	10160000	10190000		0.98775	0.0868102	26.123	12	374.558	48
FALSE	High	Master Protein	A8K878	Mesencephalic astrocyte-derived neurotrophic factor OS=Homo sapiens GN=MANF PE=1 SV=1	0	72.09	47.027	11	30	11	1	185	21.13	8.92		7873	MANF	ENSG00000145050.15	3	cell differentiation;cell organization and biogenesis;response to stimulus;transport	cytosol;endoplasmic reticulum;extracellular;nucleus	protein binding;RNA binding	Pf10208	0.961	0.961	0.978	10380000	10340000	10460000	9975000	9934000	10230000		0.966613	0.0501651	128.155	0	94.3263	11
FALSE	High	Master Protein	P0A7K2	50S ribosomal protein L7/L12 OS=Escherichia coli (strain K12) GN=rplL PE=1 SV=2	0	51.4602	42.9752	9	28	9	1	121	12.288	4.65		948489	rplL; SH08_01450; SH03_01445; SH06_01445; SH04_01445; SH07_01450; SF31_01445			metabolic process	cytosol;ribosome	catalytic activity;protein binding;structural molecule activity	Pf00542	1.663	1.656	1.681	10380000	10390000	10020000	17250000	17210000	16850000		1.66645	2.67376e-06	99	0	81.9671	9
FALSE	High	Master Protein	P33991	DNA replication licensing factor MCM4 OS=Homo sapiens GN=MCM4 PE=1 SV=5	0	249.953	46.4658	39	92	38	1	863	96.498	6.74		4173	MCM4	ENSG00000104738.16	8	metabolic process	membrane;nucleus	catalytic activity;DNA binding;nucleotide binding;protein binding	Pf00493, Pf07728, Pf14551	0.972	0.98	0.97	10320000	10580000	10090000	10030000	10370000	9789000		0.974153	0.29364	23.621	1	301.8	39
FALSE	High	Master Protein	P52815	39S ribosomal protein L12, mitochondrial OS=Homo sapiens GN=MRPL12 PE=1 SV=2	0	53.4343	30.8081	7	57	7	1	198	21.335	8.87		6182	MRPL12	ENSG00000262814.7	17	cell organization and biogenesis;metabolic process;regulation of biological process	membrane;mitochondrion;ribosome	protein binding;RNA binding;structural molecule activity	Pf00542	0.994	0.964	1.027	10260000	10570000	10340000	10200000	10190000	10610000		0.994546	0.753267	34.938	0	149.837	7
FALSE	High	Master Protein	P61457	Pterin-4-alpha-carbinolamine dehydratase OS=Homo sapiens GN=PCBD1 PE=1 SV=2	0	19.7051	42.3077	5	9	4	1	104	11.992	6.8		5092	PCBD1	ENSG00000166228.8	10	cell organization and biogenesis;metabolic process;regulation of biological process	cytoplasm;cytosol;nucleus	catalytic activity;protein binding	Pf01329	0.983	0.974	0.911	10260000	10240000	10460000	10100000	9974000	9532000		0.956266	0.105016	9	0	26.9788	5
FALSE	High	Master Protein	P62854	40S ribosomal protein S26 OS=Homo sapiens GN=RPS26 PE=1 SV=3	0	41.0026	50.4348	5	26	5	1	115	13.007	11		6231; 101929876; 728937	RPS26; LOC101929876; RPS26P25	ENSG00000197728.9	12; 20; 4	cell organization and biogenesis;metabolic process;regulation of biological process;transport	cytosol;membrane;ribosome	protein binding;RNA binding;structural molecule activity	Pf01283	0.946	0.953	0.939	10240000	10370000	10280000	9684000	9885000	9655000		0.946067	0.00624204	99	0	80.4537	5
FALSE	High	Master Protein	J3QRS3	Myosin regulatory light chain 12A OS=Homo sapiens GN=MYL12A PE=1 SV=1	0	45.4638	44.6328	7	28	7	1	177	20.444	4.75		10627	MYL12A	ENSG00000101608.12	18	cell organization and biogenesis;regulation of biological process;response to stimulus;transport	cytosol	metal ion binding;protein binding	Pf00036, Pf13202, Pf13405, Pf13833	1.035	0.984	1.05	10220000	10880000	10190000	10570000	10700000	10690000		1.02141	0.426587	24.119	0	89.8787	7
FALSE	High	Master Protein	Q16891	MICOS complex subunit MIC60 OS=Homo sapiens GN=IMMT PE=1 SV=1	0	230.6	47.0976	33	101	3	1	758	83.626	6.48		10989	IMMT	ENSG00000132305.20	2	cell organization and biogenesis;cellular homeostasis	membrane;mitochondrion	protein binding;RNA binding	Pf09731	0.96	1.01	1.017	10160000	10280000	9994000	9749000	10380000	10160000		0.995236	0.828016	23.342	32	323.647	33
FALSE	High	Master Protein	P23921	Ribonucleoside-diphosphate reductase large subunit OS=Homo sapiens GN=RRM1 PE=1 SV=1	0	216.539	40.9091	28	100	28	1	792	90.013	7.15		6240	RRM1	ENSG00000167325.14	11	cell organization and biogenesis;cell proliferation;metabolic process;response to stimulus	cytoplasm;cytosol	catalytic activity;nucleotide binding;protein binding	Pf00317, Pf02867, Pf03477	1.016	0.996	1.013	10150000	10180000	10190000	10310000	10140000	10320000		1.00819	0.288031	20.923	0	318.839	28
FALSE	High	Master Protein	Q92504	Zinc transporter SLC39A7 OS=Homo sapiens GN=SLC39A7 PE=1 SV=2	0.00172623	5.4966	2.98507	1	3	1	1	469	50.087	6.87		7922	SLC39A7	ENSG00000227402.11; ENSG00000112473.17; ENSG00000206288.13; ENSG00000226614.11; ENSG00000224399.11; ENSG00000229802.11	6; CHR_HSCHR6_MHC_MANN_CTG1; CHR_HSCHR6_MHC_QBL_CTG1; CHR_HSCHR6_MHC_COX_CTG1; CHR_HSCHR6_MHC_MCF_CTG1; CHR_HSCHR6_MHC_DBB_CTG1	cellular homeostasis;transport	endoplasmic reticulum;Golgi;membrane	protein binding;transporter activity	Pf02535	0.978	0.946	0.917	10150000	10160000	9901000	9925000	9609000	9078000		0.947072	0.153603	0.468	0	7.96966	1
FALSE	High	Master Protein	P13984	General transcription factor IIF subunit 2 OS=Homo sapiens GN=GTF2F2 PE=1 SV=2	0	67.1922	53.012	13	32	13	1	249	28.363	9.23		2963	GTF2F2	ENSG00000188342.11	13	metabolic process;regulation of biological process;response to stimulus	cytoskeleton;nucleus	catalytic activity;DNA binding;nucleotide binding;protein binding	Pf02270	0.949	0.924	0.968	10120000	9925000	9815000	9604000	9173000	9506000		0.947187	0.0351501	21.539	0	84.96	13
FALSE	High	Master Protein	B0QYN7	SUMO-conjugating enzyme OS=Homo sapiens GN=UBE2I PE=1 SV=1	0	72.391	29.8913	8	43	8	1	184	20.444	8.46		7329	UBE2I	ENSG00000103275.19	16	cell division;cell organization and biogenesis;metabolic process;regulation of biological process;response to stimulus	cytoplasm;cytosol;nucleus	catalytic activity;nucleotide binding;protein binding;RNA binding	Pf00179, Pf14461	1.014	1.021	1.001	9989000	10110000	9967000	10130000	10320000	9979000		1.01207	0.350702	165.81	0	134.95	8
FALSE	High	Master Protein	P05114	Non-histone chromosomal protein HMG-14 OS=Homo sapiens GN=HMGN1 PE=1 SV=3	0	81.5499	58	8	32	8	1	100	10.653	9.6		3150	HMGN1	ENSG00000205581.10	21	cell organization and biogenesis;metabolic process;regulation of biological process;response to stimulus	chromosome;cytoplasm;nucleus	DNA binding;protein binding		0.99	0.969	0.931	9979000	10100000	10110000	9884000	9790000	9412000		0.963464	0.116013	2510.89	0	113.909	8
FALSE	High	Master Protein	A0A0B4J1W3	N-alpha-acetyltransferase 15, NatA auxiliary subunit OS=Homo sapiens GN=NAA15 PE=1 SV=1	0	190.337	41.8497	41	107	1	1	865	101.137	7.42		80155	NAA15	ENSG00000164134.12	4	cell differentiation;metabolic process;regulation of biological process	cytoplasm;cytosol;membrane;nucleus	catalytic activity;protein binding;RNA binding	Pf12569, Pf13414	0.982	0.996	0.978	9937000	9834000	10120000	9758000	9792000	9904000		0.98538	0.22009	21.19	34	277.792	41
FALSE	High	Master Protein	P49792	E3 SUMO-protein ligase RanBP2 OS=Homo sapiens GN=RANBP2 PE=1 SV=2	0	749.183	44.1067	128	266	90	1	3224	357.974	6.2		5903	RANBP2	ENSG00000153201.15	2	cell organization and biogenesis;metabolic process;regulation of biological process;response to stimulus;transport	cytoplasm;cytosol;membrane;mitochondrion;nucleus	catalytic activity;enzyme regulator activity;metal ion binding;protein binding;RNA binding	Pf00160, Pf00515, Pf00638, Pf00641, Pf07719, Pf12185, Pf13414, Pf13432, Pf14559	0.989	1.012	0.989	9931000	9786000	9937000	9823000	9900000	9826000		0.996459	0.572846	12.23	28	853.257	128
FALSE	High	Master Protein	Q99733	Nucleosome assembly protein 1-like 4 OS=Homo sapiens GN=NAP1L4 PE=1 SV=1	0	74.5752	27.2	10	42	9	1	375	42.797	4.69		4676	NAP1L4	ENSG00000273562.4; ENSG00000205531.12	11; CHR_HSCHR11_1_CTG7	cell organization and biogenesis	cytoplasm;nucleus	protein binding;RNA binding	Pf00956	0.955	1.001	0.994	9924000	9912000	9935000	9482000	9921000	9880000		0.983608	0.365159	10.45	1	134.104	10
FALSE	High	Master Protein	A0A0B4J2C3	Translationally-controlled tumor protein OS=Homo sapiens GN=TPT1 PE=1 SV=1	0	64.6656	38.5787	8	47	8	1	197	22.559	5.24		7178	TPT1	ENSG00000133112.16	13	cell differentiation;cellular homeostasis;regulation of biological process;response to stimulus;transport	cytoplasm;cytosol;endosome;nucleus	metal ion binding;protein binding;RNA binding	Pf00838	1.026	1.013	1.006	9884000	10120000	10210000	10140000	10260000	10270000		1.01509	0.255337	80.113	0	134.547	8
FALSE	High	Master Protein	P41252	Isoleucine--tRNA ligase, cytoplasmic OS=Homo sapiens GN=IARS PE=1 SV=2	0	351.839	46.5927	51	162	51	1	1262	144.406	6.15		3376	IARS	ENSG00000196305.17	9	cell differentiation;metabolic process;regulation of biological process	cytoplasm;cytosol;membrane	catalytic activity;nucleotide binding;protein binding;RNA binding	Pf00133, Pf01406, Pf08264, Pf09334	0.981	0.983	0.982	9880000	10110000	9923000	9692000	9934000	9744000		0.981847	0.15061	37.075	0	505.524	51
FALSE	High	Master Protein	Q9Y265	RuvB-like 1 OS=Homo sapiens GN=RUVBL1 PE=1 SV=1	0	202.479	57.0175	22	93	22	1	456	50.196	6.42		8607	RUVBL1	ENSG00000175792.11	3	cell division;cell organization and biogenesis;metabolic process;regulation of biological process;response to stimulus	cytoplasm;cytoskeleton;cytosol;membrane;nucleus	catalytic activity;nucleotide binding;protein binding	Pf00004, Pf01078, Pf01695, Pf05496, Pf06068, Pf06414, Pf07726, Pf13191, Pf13238, Pf13245, Pf13481	0.978	1.029	1.023	9828000	9348000	9582000	9613000	9618000	9803000		1.0096	0.590853	110.034	0	323.881	22
FALSE	High	Master Protein	F8W727	60S ribosomal protein L32 OS=Homo sapiens GN=RPL32 PE=1 SV=1	0	84.0446	45.7516	11	71	11	1	153	17.951	10.59				ENSG00000144713.12	3	metabolic process	ribosome	structural molecule activity	Pf01655	0.925	1.006	1.011	9820000	9153000	9375000	9086000	9204000	9477000		0.979505	0.453283	1290.55	0	187.909	11
FALSE	High	Master Protein	P31939	Bifunctional purine biosynthesis protein PURH OS=Homo sapiens GN=ATIC PE=1 SV=3	0	307.311	63.3446	31	158	31	1	592	64.575	6.71		471	ATIC	ENSG00000138363.14	2	metabolic process;response to stimulus	cytosol;membrane;mitochondrion	catalytic activity;protein binding	Pf01808, Pf02142	0.99	0.998	0.988	9811000	9768000	10010000	9716000	9744000	9885000		0.991754	0.42763	87.297	0	519.896	31
FALSE	High	Master Protein	O14744	Protein arginine N-methyltransferase 5 OS=Homo sapiens GN=PRMT5 PE=1 SV=4	0	138.101	34.6939	21	67	21	1	637	72.638	6.29		10419	PRMT5	ENSG00000100462.15	14	cell organization and biogenesis;cell proliferation;metabolic process;regulation of biological process	cytoplasm;cytosol;Golgi;nucleus	catalytic activity;DNA binding;nucleotide binding;protein binding	Pf02475, Pf05185	0.989	1.004	1.006	9780000	9524000	9695000	9668000	9558000	9748000		0.999138	0.933477	14.199	0	207.448	21
FALSE	High	Master Protein	A0A087WY61	Nuclear mitotic apparatus protein 1 OS=Homo sapiens GN=NUMA1 PE=1 SV=1	0	636.371	48.7375	90	209	51	1	2099	236.019	5.92				ENSG00000137497.17	11	metabolic process	cytosol;membrane		Pf04111, Pf07888, Pf12128	0.964	0.965	0.991	9779000	9700000	9418000	9426000	9359000	9331000		0.972973	0.133192	17.672	29	703.521	90
FALSE	High	Master Protein	P61956	Small ubiquitin-related modifier 2 OS=Homo sapiens GN=SUMO2 PE=1 SV=3	0	48.8661	27.3684	3	47	2	1	95	10.864	5.5		6613	SUMO2	ENSG00000188612.11	17	metabolic process;regulation of biological process;response to stimulus	nucleus	catalytic activity;protein binding;RNA binding	Pf00240, Pf11976	0.96	0.992	0.905	9758000	9934000	10420000	9364000	9854000	9434000		0.951514	0.12815	315.228	0	156.809	3
FALSE	High	Master Protein	P09012	U1 small nuclear ribonucleoprotein A OS=Homo sapiens GN=SNRPA PE=1 SV=3	0	42.1406	26.5957	6	17	4	1	282	31.259	9.83		6626	SNRPA	ENSG00000077312.8	19	metabolic process;regulation of biological process	nucleus;spliceosomal complex	nucleotide binding;protein binding;RNA binding	Pf00076, Pf13893, Pf14259	0.999	1.053	0.991	9745000	9444000	9900000	9738000	9940000	9813000		1.01382	0.43275	9	0	57.127	6
FALSE	High	Master Protein	Q9BRA2	Thioredoxin domain-containing protein 17 OS=Homo sapiens GN=TXNDC17 PE=1 SV=1	0	21.5033	43.9024	5	13	5	1	123	13.932	5.52		84817	TXNDC17	ENSG00000129235.10	17	metabolic process;regulation of biological process;response to stimulus	cytoplasm;cytosol	antioxidant activity;catalytic activity;protein binding	Pf06110, Pf13098	1.024	0.951	0.933	9725000	10230000	10150000	9958000	9732000	9463000		0.968377	0.209693	9	0	40.2705	5
FALSE	High	Master Protein	E5RIM7	Copper transport protein ATOX1 OS=Homo sapiens GN=ATOX1 PE=1 SV=1	0	24.58	47.9452	5	11	5	1	73	7.869	7.24				ENSG00000177556.11	5	transport		metal ion binding	Pf00403	0.925	0.984	0.941	9716000	9697000	9912000	8988000	9538000	9330000		0.949906	0.075796	176.828	0	30.7008	5
FALSE	High	Master Protein	P17812	CTP synthase 1 OS=Homo sapiens GN=CTPS1 PE=1 SV=2	0	170.51	46.1929	26	89	24	1	591	66.648	6.46		1503	CTPS1	ENSG00000171793.13	1	cell proliferation;metabolic process;response to stimulus	cytosol;membrane	catalytic activity;nucleotide binding;protein binding	Pf00117, Pf06418, Pf07722	0.996	0.995	0.981	9706000	9947000	9832000	9664000	9895000	9647000		0.990538	0.430803	28.427	2	293.047	26
FALSE	High	Master Protein	Q14247	Src substrate cortactin OS=Homo sapiens GN=CTTN PE=1 SV=2	0	169.393	48.3636	29	75	29	1	550	61.549	5.4		2017	CTTN	ENSG00000085733.15	11	cell organization and biogenesis;cellular component movement;regulation of biological process;transport	cytoplasm;cytoskeleton;cytosol;Golgi;membrane	protein binding	Pf00018, Pf02218, Pf07653, Pf14604	0.99	1.017	0.988	9686000	9731000	9819000	9588000	9892000	9698000		0.998016	0.855959	50.795	0	250.977	29
FALSE	High	Master Protein	O60869	Endothelial differentiation-related factor 1 OS=Homo sapiens GN=EDF1 PE=1 SV=1	0	47.7418	40.5405	7	28	7	1	148	16.359	9.95		8721	EDF1	ENSG00000107223.12	9	cell differentiation;development;metabolic process;regulation of biological process	cytoplasm;cytosol;nucleus	catalytic activity;DNA binding;protein binding;RNA binding	Pf01381, Pf08523, Pf12844, Pf13560	1.055	0.972	1.029	9670000	9803000	9539000	10200000	9527000	9816000		1.0183	0.468467	30.623	0	86.1112	7
FALSE	High	Master Protein	Q9BT78	COP9 signalosome complex subunit 4 OS=Homo sapiens GN=COPS4 PE=1 SV=1	0	168.918	65.2709	24	60	24	1	406	46.24	5.83		51138	COPS4	ENSG00000138663.8	4	cell organization and biogenesis;metabolic process;response to stimulus	cytoplasm;cytosol;nucleus	catalytic activity;protein binding	Pf01399	1.01	0.982	1.001	9654000	9528000	9527000	9746000	9360000	9538000		0.997736	0.869227	48.239	0	201.708	24
FALSE	High	Master Protein	P54886	Delta-1-pyrroline-5-carboxylate synthase OS=Homo sapiens GN=ALDH18A1 PE=1 SV=2	0	279.114	52.2013	39	139	39	1	795	87.248	7.12		5832	ALDH18A1	ENSG00000059573.8	10	metabolic process	cytoplasm;cytosol;membrane;mitochondrion	catalytic activity;nucleotide binding;protein binding;RNA binding	Pf00171, Pf00696	0.95	0.981	0.999	9651000	9440000	9367000	9168000	9257000	9355000		0.976175	0.100682	43.893	0	431.743	39
FALSE	High	Master Protein	A0A024R4E5	High density lipoprotein binding protein (Vigilin), isoform CRA_a OS=Homo sapiens GN=HDLBP PE=1 SV=1	0	319.839	44.0063	55	145	55	1	1268	141.352	6.87		3069	HDLBP	ENSG00000115677.16	2	metabolic process;transport	cytosol;membrane;nucleus	protein binding;RNA binding	Pf00013, Pf13014, Pf14611	0.983	0.996	0.98	9610000	9566000	9601000	9448000	9529000	9411000		0.986482	0.0507504	21.814	0	435.401	55
FALSE	High	Master Protein	P62847	40S ribosomal protein S24 OS=Homo sapiens GN=RPS24 PE=1 SV=1	0	72.0444	26.3158	5	45	5	1	133	15.413	10.78		6229	RPS24	ENSG00000138326.18	10	cell organization and biogenesis;metabolic process;transport	cytosol;membrane;nucleus;ribosome	nucleotide binding;protein binding;RNA binding;structural molecule activity	Pf01282	0.939	1.039	0.948	9610000	9114000	9798000	9020000	9472000	9292000		0.974125	0.377036	999	0	138.017	5
FALSE	High	Master Protein	Q92598	Heat shock protein 105 kDa OS=Homo sapiens GN=HSPH1 PE=1 SV=1	0	405.757	57.9254	48	188	44	1	858	96.804	5.39		10808	HSPH1	ENSG00000120694.19	13	metabolic process;regulation of biological process;response to stimulus;transport	cytoplasm;cytosol;extracellular;nucleus;organelle lumen	enzyme regulator activity;nucleotide binding;protein binding	Pf00012	1.006	0.991	0.998	9595000	9777000	9549000	9648000	9688000	9533000		0.998202	0.847443	138.905	3	604.88	48
FALSE	High	Master Protein	O43583	Density-regulated protein OS=Homo sapiens GN=DENR PE=1 SV=2	0	47.1091	43.9394	8	17	8	1	198	22.078	5.3		8562	DENR	ENSG00000139726.10	12	cell organization and biogenesis;metabolic process	ribosome	protein binding;RNA binding	Pf01253	0.92	1.027	1.046	9591000	9031000	9322000	8822000	9271000	9746000		0.996242	0.917159	20.544	0	56.7249	8
FALSE	High	Master Protein	P06737	Glycogen phosphorylase, liver form OS=Homo sapiens GN=PYGL PE=1 SV=4	0	336.41	55.3719	47	190	42	1	847	97.087	7.17		5836	PYGL	ENSG00000100504.16	14	cell death;metabolic process;transport	cytoplasm;cytosol;extracellular;organelle lumen	catalytic activity;nucleotide binding;protein binding	Pf00343	0.984	0.993	0.971	9567000	9358000	9603000	9417000	9290000	9324000		0.982579	0.149517	83.319	5	538.368	47
FALSE	High	Master Protein	P49458	Signal recognition particle 9 kDa protein OS=Homo sapiens GN=SRP9 PE=1 SV=2	0	28.7878	41.8605	4	19	4	1	86	10.105	7.97		6726; 653226	SRP9; SRP9P1	ENSG00000143742.12	1; 10	cell organization and biogenesis;regulation of biological process;transport	cytoplasm;cytosol	protein binding;RNA binding	Pf05486	0.917	0.902	1.025	9557000	9335000	8407000	8762000	8417000	8618000		0.94498	0.288854	25.827	0	50.9143	4
FALSE	High	Master Protein	P55265	Double-stranded RNA-specific adenosine deaminase OS=Homo sapiens GN=ADAR PE=1 SV=4	0	270.232	40.1305	46	128	46	1	1226	135.981	8.65		103	ADAR	ENSG00000160710.15	1	cell differentiation;cell organization and biogenesis;defense response;metabolic process;regulation of biological process;response to stimulus;transport	cytoplasm;membrane;nucleus;spliceosomal complex	catalytic activity;DNA binding;metal ion binding;protein binding;RNA binding	Pf00035, Pf02137, Pf02295	0.968	0.986	0.998	9532000	9503000	9409000	9228000	9371000	9391000		0.984039	0.0815711	12.895	0	378.008	46
FALSE	High	Master Protein	Q92616	eIF-2-alpha kinase activator GCN1 OS=Homo sapiens GN=GCN1 PE=1 SV=6	0	659.145	47.4354	117	251	117	1	2671	292.572	7.47		10985	GCN1L1; GCN1		12	cell communication;metabolic process;regulation of biological process;response to stimulus	cytoplasm;cytosol;membrane;ribosome	enzyme regulator activity;protein binding;RNA binding	Pf12074, Pf13646	0.994	1.006	0.982	9528000	9587000	9656000	9474000	9646000	9478000		0.993987	0.449387	10.159	0	780.551	117
FALSE	High	Master Protein	P54578	Ubiquitin carboxyl-terminal hydrolase 14 OS=Homo sapiens GN=USP14 PE=1 SV=3	0	130.655	47.166	25	49	25	1	494	56.033	5.3		9097	USP14	ENSG00000101557.14	18	cell communication;metabolic process;regulation of biological process	cell surface;cytoplasm;cytosol;membrane;proteasome	catalytic activity;enzyme regulator activity;protein binding	Pf00443, Pf13423	0.963	1.013	0.967	9515000	9441000	9627000	9162000	9562000	9308000		0.980723	0.254526	25.49	0	144.007	25
FALSE	High	Master Protein	O75131	Copine-3 OS=Homo sapiens GN=CPNE3 PE=1 SV=1	0	144.83	36.8715	18	62	17	1	537	60.092	5.85		8895	CPNE3	ENSG00000085719.12	8	metabolic process;regulation of biological process;response to stimulus;transport	cytoplasm;cytosol;membrane;mitochondrion;nucleus	catalytic activity;protein binding;RNA binding;transporter activity	Pf00168, Pf07002, Pf10138	0.965	0.986	0.966	9504000	9669000	9625000	9169000	9529000	9300000		0.97222	0.11045	22.263	1	183.252	18
FALSE	High	Master Protein	P15170	Eukaryotic peptide chain release factor GTP-binding subunit ERF3A OS=Homo sapiens GN=GSPT1 PE=1 SV=1	0	145.247	44.6894	24	67	24	1	499	55.72	5.62		2935	GSPT1	ENSG00000103342.12	16	cell organization and biogenesis;metabolic process	cytosol	catalytic activity;nucleotide binding;protein binding;RNA binding	Pf00009, Pf03143, Pf03144	0.982	0.938	0.981	9496000	10050000	9767000	9324000	9422000	9581000		0.966363	0.164935	48.239	0	194.073	24
FALSE	High	Master Protein	Q13813	Spectrin alpha chain, non-erythrocytic 1 OS=Homo sapiens GN=SPTAN1 PE=1 SV=3	0	771.373	51.4159	120	269	2	1	2472	284.364	5.35		6709	SPTAN1	ENSG00000197694.15	9	cell organization and biogenesis;cellular component movement;metabolic process;regulation of biological process;response to stimulus;transport	cytoplasm;cytoskeleton;cytosol;extracellular;membrane;organelle lumen	metal ion binding;protein binding;structural molecule activity	Pf00018, Pf00036, Pf00435, Pf07653, Pf08239, Pf08726, Pf13405, Pf13499, Pf14604	0.992	1.002	1.008	9493000	9554000	9495000	9417000	9577000	9571000		1.00081	0.901197	24.038	98	879.986	120
FALSE	High	Master Protein	P55884	Eukaryotic translation initiation factor 3 subunit B OS=Homo sapiens GN=EIF3B PE=1 SV=3	0	216.935	33.5381	25	109	25	1	814	92.424	5		8662	EIF3B	ENSG00000106263.17	7	cell organization and biogenesis;metabolic process;regulation of biological process	cytoplasm;cytosol	nucleotide binding;protein binding;RNA binding;structural molecule activity	Pf00076, Pf08662, Pf13893, Pf14259	0.968	0.952	1.018	9491000	9666000	9431000	9187000	9206000	9605000		0.979362	0.29003	26.283	0	353.841	25
FALSE	High	Master Protein	P02545	Prelamin-A/C OS=Homo sapiens GN=LMNA PE=1 SV=1	0	287.924	57.3795	40	116	38	1	664	74.095	7.02		4000	LMNA	ENSG00000160789.19	1	cell organization and biogenesis;regulation of biological process;response to stimulus;transport	cytosol;membrane;nucleus	protein binding;structural molecule activity	Pf00038, Pf00932	0.991	0.972	0.971	9422000	9515000	9558000	9341000	9252000	9277000		0.978066	0.0168045	53.714	0	375.45	40
FALSE	High	Master Protein	Q14444	Caprin-1 OS=Homo sapiens GN=CAPRIN1 PE=1 SV=2	0	133.817	21.1566	14	73	14	1	709	78.318	5.25		4076	CAPRIN1	ENSG00000135387.20	11	cell differentiation;regulation of biological process	cytoplasm;cytosol;membrane	protein binding;RNA binding	Pf12287	0.989	0.996	0.959	9397000	9356000	9421000	9298000	9321000	9037000		0.981614	0.194384	25.102	0	215.583	14
FALSE	High	Master Protein	P47813	Eukaryotic translation initiation factor 1A, X-chromosomal OS=Homo sapiens GN=EIF1AX PE=1 SV=2	0	48.1528	48.6111	8	31	8	1	144	16.45	5.24		1964; 107984923	EIF1AX; LOC101060318; LOC107984923	ENSG00000173674.10	X; 1	metabolic process	cytosol	protein binding;RNA binding	Pf01176	1.037	1.001	0.948	9394000	9530000	9804000	9740000	9536000	9295000		0.994535	0.781407	99	0	86.4729	8
FALSE	High	Master Protein	P20042	Eukaryotic translation initiation factor 2 subunit 2 OS=Homo sapiens GN=EIF2S2 PE=1 SV=2	0	126.185	62.4625	22	66	22	1	333	38.364	5.8		8894	EIF2S2	ENSG00000125977.6	20	cell proliferation;metabolic process;transport	cytoplasm;cytosol;nucleus	metal ion binding;protein binding;RNA binding	Pf01873, Pf04147	0.971	0.956	0.984	9380000	9559000	9307000	9104000	9135000	9161000		0.970049	0.0577823	36.276	0	193.348	22
FALSE	High	Master Protein	P43246	DNA mismatch repair protein Msh2 OS=Homo sapiens GN=MSH2 PE=1 SV=1	0	160.695	37.5803	34	66	34	1	934	104.677	5.77		4436	MSH2	ENSG00000095002.13	2	cell differentiation;cell organization and biogenesis;metabolic process;regulation of biological process;response to stimulus	membrane;nucleus	catalytic activity;DNA binding;metal ion binding;nucleotide binding;protein binding	Pf00488, Pf01624, Pf05188, Pf05190, Pf05192	1.003	0.978	0.967	9361000	9550000	9575000	9387000	9338000	9258000		0.982342	0.114843	9.502	0	189.271	34
FALSE	High	Master Protein	P41250	Glycine--tRNA ligase OS=Homo sapiens GN=GARS PE=1 SV=3	0	175.924	41.272	33	89	33	1	739	83.113	7.03		2617	GARS	ENSG00000106105.13	7	metabolic process	cytoplasm;cytosol;extracellular;mitochondrion;organelle lumen	catalytic activity;nucleotide binding;protein binding	Pf00458, Pf00587, Pf03129	0.973	0.921	0.975	9347000	9843000	9370000	9093000	9066000	9137000		0.955742	0.118766	22.22	0	263.374	33
FALSE	High	Master Protein	A0A024QZP7	Cell division cycle 2, G1 to S and G2 to M, isoform CRA_a OS=Homo sapiens GN=CDC2 PE=1 SV=1	0	149.627	63.6364	17	86	15	1	297	34.06	8.4		983	CDK1	ENSG00000170312.15	10	cell death;cell differentiation;cell division;cell organization and biogenesis;cell proliferation;cellular component movement;metabolic process;regulation of biological process;response to stimulus	cytosol;membrane;mitochondrion;nucleus	catalytic activity;nucleotide binding;protein binding	Pf00069, Pf07714, Pf14531	0.96	1.003	0.983	9326000	8928000	9201000	8951000	8955000	9049000		0.981788	0.289704	99	1	294.566	17
FALSE	High	Master Protein	Q9UBE0	SUMO-activating enzyme subunit 1 OS=Homo sapiens GN=SAE1 PE=1 SV=1	0	116.206	52.8902	18	61	18	1	346	38.426	5.3		10055	SAE1	ENSG00000142230.11	19	metabolic process;regulation of biological process	cytoplasm;nucleus	catalytic activity;enzyme regulator activity;protein binding	Pf00899	0.978	0.928	0.966	9317000	9389000	9050000	9108000	8713000	8742000		0.957018	0.0747195	42.288	0	179.757	18
FALSE	High	Master Protein	P84098	60S ribosomal protein L19 OS=Homo sapiens GN=RPL19 PE=1 SV=1	0	76.8151	23.9796	8	70	8	1	196	23.451	11.47		6143	RPL19	ENSG00000108298.9	17	cell organization and biogenesis;metabolic process;transport	cytosol;membrane;ribosome	protein binding;RNA binding;structural molecule activity	Pf01280	0.977	0.969	1.012	9294000	8889000	8800000	9084000	8614000	8907000		0.985991	0.57179	2153.43	0	204.065	8
FALSE	High	Master Protein	Q15424	Scaffold attachment factor B1 OS=Homo sapiens GN=SAFB PE=1 SV=4	0	252.194	40.4372	39	113	26	1	915	102.58	5.47		6294	SAFB	ENSG00000160633.12	19	cell organization and biogenesis;metabolic process;regulation of biological process;response to stimulus	nucleus	DNA binding;nucleotide binding;protein binding;RNA binding	Pf00076, Pf02037, Pf13893, Pf14259	0.966	0.986	0.971	9268000	8963000	8969000	8953000	8836000	8710000		0.974228	0.138124	54.41	11	333.063	39
FALSE	High	Master Protein	I3L4Q0	HCG1818442, isoform CRA_a OS=Homo sapiens GN=FAM195B PE=1 SV=1	0	28.2736	41.5254	4	10	4	1	118	12.943	9.63		348262	FAM195B; MCRIP1	ENSG00000225663.7	17	regulation of biological process	cytoplasm;nucleus	protein binding	Pf14799	1.037	0.96	1.022	9251000	9795000	9237000	9598000	9402000	9443000		1.00566	0.80433	12.895	0	31.7007	4
FALSE	High	Master Protein	Q96CT7	Coiled-coil domain-containing protein 124 OS=Homo sapiens GN=CCDC124 PE=1 SV=1	0	64.3312	57.8475	16	38	16	1	223	25.82	9.54		115098	CCDC124	ENSG00000007080.10	19	cell division	cytoplasm;cytoskeleton	RNA binding	Pf06244	0.969	1.042	0.987	9244000	9345000	9535000	8957000	9737000	9408000		0.999218	0.977997	81.54	0	101.389	16
FALSE	High	Master Protein	P56192	Methionine--tRNA ligase, cytoplasmic OS=Homo sapiens GN=MARS PE=1 SV=2	0	226.257	39.7778	30	116	30	1	900	101.052	6.16		4141	MARS	ENSG00000166986.14	12	cell communication;metabolic process;regulation of biological process;response to stimulus	cytoplasm;cytosol;membrane	catalytic activity;nucleotide binding;protein binding;RNA binding	Pf00043, Pf00133, Pf00458, Pf09334, Pf10978, Pf13409, Pf13410, Pf14497	0.97	0.995	0.965	9211000	9133000	8979000	8939000	9090000	8669000		0.977125	0.231995	23.561	0	357.94	30
FALSE	High	Master Protein	Q9P013	Spliceosome-associated protein CWC15 homolog OS=Homo sapiens GN=CWC15 PE=1 SV=2	0	41.6734	24.4541	5	10	5	1	229	26.608	5.71		51503	CWC15	ENSG00000150316.11	11	metabolic process	mitochondrion;nucleus;spliceosomal complex	protein binding;RNA binding	Pf04889	0.986	0.91	1.008	9206000	9567000	9172000	9079000	8707000	9242000		0.967186	0.209233	11.915	0	41.5422	5
FALSE	High	Master Protein	P50213	Isocitrate dehydrogenase [NAD] subunit alpha, mitochondrial OS=Homo sapiens GN=IDH3A PE=1 SV=1	0	70.3948	31.1475	12	33	12	1	366	39.566	6.92		3419	IDH3A	ENSG00000166411.13	15	metabolic process	mitochondrion;nucleus;organelle lumen	catalytic activity;metal ion binding;nucleotide binding	Pf00180	0.958	0.978	0.986	9203000	9272000	9194000	8820000	9065000	9061000		0.97387	0.0861458	13.125	0	92.0328	12
FALSE	High	Master Protein	Q00059	Transcription factor A, mitochondrial OS=Homo sapiens GN=TFAM PE=1 SV=1	0	58.0945	39.0244	13	35	13	1	246	29.078	9.72		7019	TFAM	ENSG00000108064.10	10	cell organization and biogenesis;metabolic process;regulation of biological process	cytosol;mitochondrion;nucleus;organelle lumen	DNA binding;protein binding;RNA binding	Pf00505, Pf09011	0.998	1.011	0.995	9195000	9085000	9310000	9178000	9181000	9264000		1.0012	0.887318	19.535	0	89.6742	13
FALSE	High	Master Protein	B8ZZN6	Small ubiquitin-related modifier 1 OS=Homo sapiens GN=SUMO1 PE=1 SV=1	0	14.7508	8.21918	1	6	1	1	146	16.634	6.2				ENSG00000116030.16	2	metabolic process	membrane;nucleus	protein binding	Pf00240, Pf11976	1.008	0.987	1.001	9184000	9119000	8829000	9256000	8997000	8834000		0.998341	0.931717	1.683	0	23.609	1
FALSE	High	Master Protein	Q15392	Delta(24)-sterol reductase OS=Homo sapiens GN=DHCR24 PE=1 SV=2	0	25.9666	10.6589	6	15	6	1	516	60.062	8.16		1718	DHCR24	ENSG00000116133.11	1	cell death;cell organization and biogenesis;metabolic process;regulation of biological process;response to stimulus	cytoplasm;cytoskeleton;cytosol;endoplasmic reticulum;Golgi;membrane;nucleus	catalytic activity;nucleotide binding;protein binding	Pf01565	0.994	1.014	0.998	9175000	8995000	9123000	9121000	9119000	9101000		1.00176	0.793744	1.721	0	40.6376	6
FALSE	High	Master Protein	H0YHG0	Uncharacterized protein (Fragment) OS=Homo sapiens PE=1 SV=1	0	66.0799	20.8413	11	32	11	1	523	59.148	8.59				ENSG00000257390.5	12			protein binding	Pf00226, Pf02037, Pf14901	0.993	1.024	0.976	9152000	9182000	9422000	9087000	9404000	9194000		0.997442	0.860618	3.262	0	83.9517	11
FALSE	High	Master Protein	Q9Y383	Putative RNA-binding protein Luc7-like 2 OS=Homo sapiens GN=LUC7L2 PE=1 SV=2	0	171.237	41.8367	18	101	12	1	392	46.486	10.01		51631	LUC7L2	ENSG00000146963.17	7	cell organization and biogenesis	nucleus;spliceosomal complex	protein binding;RNA binding	Pf03194	0.985	1.009	1.027	9143000	8910000	9136000	9008000	8987000	9380000		1.00684	0.702805	315.228	10	314.627	18
FALSE	High	Master Protein	Q12874	Splicing factor 3A subunit 3 OS=Homo sapiens GN=SF3A3 PE=1 SV=1	0	119.134	31.7365	16	54	16	1	501	58.812	5.38		10946	SF3A3	ENSG00000183431.11	1	cell organization and biogenesis;metabolic process	nucleus;spliceosomal complex	metal ion binding;protein binding;RNA binding	Pf11931, Pf12108, Pf13297	0.987	0.984	0.947	9142000	9252000	9099000	9025000	9104000	8616000		0.972793	0.236198	15.156	0	181.63	16
FALSE	High	Master Protein	P61081	NEDD8-conjugating enzyme Ubc12 OS=Homo sapiens GN=UBE2M PE=1 SV=1	0	68.4219	45.9016	10	47	10	1	183	20.887	7.69		9040	UBE2M	ENSG00000130725.7	19	metabolic process;regulation of biological process;response to stimulus	cytoplasm;cytosol	catalytic activity;nucleotide binding;protein binding	Pf00179	0.998	1.012	0.998	9133000	9175000	8961000	9113000	9290000	8945000		1.0029	0.837569	80.113	0	128.433	10
FALSE	High	Master Protein	P52907	F-actin-capping protein subunit alpha-1 OS=Homo sapiens GN=CAPZA1 PE=1 SV=3	0	118.41	55.5944	12	56	9	1	286	32.902	5.69		829	CAPZA1	ENSG00000116489.12	1	cell organization and biogenesis;cellular component movement;coagulation;defense response;regulation of biological process;response to stimulus	cytoplasm;cytoskeleton;cytosol;extracellular	protein binding	Pf01267	0.858	1.008	0.998	9116000	8452000	8535000	7825000	8516000	8518000		0.952343	0.254171	82.768	2	190.714	12
FALSE	High	Master Protein	P48047	ATP synthase subunit O, mitochondrial OS=Homo sapiens GN=ATP5O PE=1 SV=1	0	111.806	62.9108	12	70	12	1	213	23.263	9.96		539	ATP5O	ENSG00000241837.6	21	cell organization and biogenesis;metabolic process;transport	membrane;mitochondrion;nucleus	catalytic activity;protein binding;transporter activity	Pf00213	1.013	0.981	0.999	9107000	9344000	9422000	9226000	9164000	9408000		0.997309	0.845402	382.119	0	215.005	12
FALSE	High	Master Protein	P0A9S3	Galactitol-1-phosphate 5-dehydrogenase OS=Escherichia coli (strain K12) GN=gatD PE=1 SV=1	0	103.955	33.815	12	65	12	1	346	37.366	6.38		946598	gatD; SH08_14620; SH03_14520; SH06_14825; SH04_14510; SH07_14515; SF31_14830			metabolic process	cytosol	catalytic activity;metal ion binding;protein binding	Pf00107, Pf08240	1.766	1.768	1.768	9101000	9353000	9117000	16070000	16540000	16120000		1.76744	2.339e-05	45.416	0	205.641	12
FALSE	High	Master Protein	P08243	Asparagine synthetase [glutamine-hydrolyzing] OS=Homo sapiens GN=ASNS PE=1 SV=4	0	184.69	57.041	26	102	26	1	561	64.329	6.86		440	ASNS	ENSG00000070669.16	7	cell communication;metabolic process;regulation of biological process;response to stimulus	cytosol	catalytic activity;nucleotide binding;protein binding	Pf00310, Pf00733, Pf12481, Pf13522, Pf13537	0.938	0.946	0.979	9098000	9034000	8908000	8536000	8544000	8722000		0.954216	0.00760768	35.517	0	307.38	26
FALSE	High	Master Protein	P60228	Eukaryotic translation initiation factor 3 subunit E OS=Homo sapiens GN=EIF3E PE=1 SV=1	0	122.487	40.4494	17	69	17	1	445	52.187	6.04		3646	EIF3E	ENSG00000104408.9	8	metabolic process;regulation of biological process	chromosome;cytoplasm;cytosol;membrane;nucleus	protein binding;RNA binding	Pf01399, Pf09440	0.993	0.972	0.917	9072000	8932000	9275000	9009000	8677000	8508000		0.960226	0.121167	15.379	0	210.183	17
FALSE	High	Master Protein	P40939	Trifunctional enzyme subunit alpha, mitochondrial OS=Homo sapiens GN=HADHA PE=1 SV=2	0	278.506	46.1337	32	124	32	1	763	82.947	9.04		3030	HADHA	ENSG00000084754.10	2	metabolic process;response to stimulus	membrane;mitochondrion	catalytic activity;nucleotide binding;protein binding	Pf00378, Pf00725, Pf02737	0.962	0.994	0.981	9064000	8810000	8844000	8719000	8761000	8678000		0.97904	0.134277	42.067	0	400.703	32
FALSE	High	Master Protein	Q16543	Hsp90 co-chaperone Cdc37 OS=Homo sapiens GN=CDC37 PE=1 SV=1	0	131.268	34.127	13	61	13	1	378	44.44	5.25		11140	CDC37	ENSG00000105401.8	19	cell division;metabolic process;regulation of biological process;response to stimulus;transport	cytoplasm;cytosol	catalytic activity;enzyme regulator activity;protein binding	Pf03234, Pf08564, Pf08565	0.947	1.015	0.933	9060000	8755000	9153000	8577000	8884000	8542000		0.964217	0.118796	214.443	0	182.192	13
FALSE	High	Master Protein	K7ER90	Eukaryotic translation initiation factor 3 subunit G (Fragment) OS=Homo sapiens GN=EIF3G PE=1 SV=1	0	84.5652	59.4714	14	54	1	1	227	25.426	5.49				ENSG00000130811.11	19	metabolic process	cytoplasm;cytosol	nucleotide binding;RNA binding	Pf12353	0.95	0.935	1.01	9057000	9079000	8285000	8607000	8490000	8369000		0.963855	0.346878	83.834	0	166.516	14
FALSE	High	Master Protein	P51149	Ras-related protein Rab-7a OS=Homo sapiens GN=RAB7A PE=1 SV=1	0	110.133	69.5652	14	73	14	1	207	23.475	6.7		7879	RAB7A	ENSG00000075785.12	3	cell organization and biogenesis;cellular homeostasis;metabolic process;regulation of biological process;response to stimulus;transport	cytoplasm;cytosol;endosome;Golgi;membrane;vacuole	catalytic activity;nucleotide binding;protein binding	Pf00025, Pf00071, Pf01926, Pf04670, Pf07728, Pf08477	1.019	0.965	0.969	9017000	9403000	9287000	9193000	9073000	8999000		0.984047	0.33371	99	0	237.772	14
FALSE	High	Master Protein	E9PAV3	Nascent polypeptide-associated complex subunit alpha, muscle-specific form OS=Homo sapiens GN=NACA PE=1 SV=1	0	67.9563	3.80173	7	60	7	1	2078	205.295	9.58		4666	NACA	ENSG00000196531.10	12	metabolic process;regulation of biological process	cytoplasm;nucleus	DNA binding	Pf01849	0.999	1.019	0.993	9014000	8694000	9109000	9006000	8863000	9050000		1.0038	0.822013	0.385	0	119.84	7
FALSE	High	Master Protein	P05198	Eukaryotic translation initiation factor 2 subunit 1 OS=Homo sapiens GN=EIF2S1 PE=1 SV=3	0	155.801	64.4444	22	65	22	1	315	36.089	5.08		1965	EIF2S1	ENSG00000134001.12	14	cell communication;metabolic process;regulation of biological process;response to stimulus;transport	cytoplasm;cytosol;membrane;nucleus;ribosome	protein binding;RNA binding	Pf00575, Pf07541	0.992	0.968	0.972	9012000	9084000	9047000	8939000	8790000	8793000		0.977121	0.0367776	89.063	0	200.028	22
FALSE	High	Master Protein	P26583	High mobility group protein B2 OS=Homo sapiens GN=HMGB2 PE=1 SV=2	0	90.0782	30.1435	11	49	10	1	209	24.019	7.81		3148	HMGB2	ENSG00000164104.11	4	cell organization and biogenesis;cellular component movement;defense response;metabolic process;regulation of biological process;response to stimulus	chromosome;cytoplasm;extracellular;nucleus	DNA binding;protein binding;RNA binding	Pf00505, Pf09011	1.032	0.972	0.979	9010000	9124000	9413000	9301000	8864000	9214000		0.993901	0.770813	748.894	0	154.817	11
FALSE	High	Master Protein	P67775	Serine/threonine-protein phosphatase 2A catalytic subunit alpha isoform OS=Homo sapiens GN=PPP2CA PE=1 SV=1	0	94.173	56.9579	14	42	2	1	309	35.571	5.54		5515	PPP2CA	ENSG00000113575.9	5	cell death;cell organization and biogenesis;metabolic process;regulation of biological process;response to stimulus	chromosome;cytoplasm;cytoskeleton;cytosol;membrane;mitochondrion;nucleus	catalytic activity;metal ion binding;protein binding	Pf00149	0.926	0.938	0.884	8995000	8732000	8574000	8330000	8190000	7579000		0.916277	0.0660326	24.809	0	142.553	14
FALSE	High	Master Protein	A0A087WZV1	Heterogeneous nuclear ribonucleoprotein A/B OS=Homo sapiens GN=HNRNPAB PE=1 SV=1	0	122.5	35.7576	15	102	14	1	330	36.536	9.09								nucleotide binding	Pf00076, Pf08143, Pf13893, Pf14259	1.007	1.006	0.996	8991000	9075000	9093000	9055000	9128000	9057000		1.00298	0.534745	250.189	0	283.414	15
FALSE	High	Master Protein	P11172	Uridine 5'-monophosphate synthase OS=Homo sapiens GN=UMPS PE=1 SV=1	0	124.277	47.0833	23	55	23	1	480	52.189	7.24		7372	UMPS	ENSG00000114491.13	3	metabolic process;response to stimulus;transport	cytoplasm;cytosol;nucleus	catalytic activity	Pf00156, Pf00215	0.977	1	0.978	8978000	8880000	9060000	8769000	8881000	8864000		0.984991	0.107849	12.594	0	178.643	23
FALSE	High	Master Protein	Q14683	Structural maintenance of chromosomes protein 1A OS=Homo sapiens GN=SMC1A PE=1 SV=2	0	441.701	55.3933	70	181	70	1	1233	143.144	7.64		8243	SMC1A	ENSG00000072501.17	X	cell division;cell organization and biogenesis;metabolic process;regulation of biological process;response to stimulus	chromosome;cytosol;nucleus	nucleotide binding;protein binding;RNA binding	Pf02463, Pf05262, Pf05557, Pf06470, Pf09726, Pf09731, Pf10186, Pf12128, Pf13175, Pf13304, Pf13476, Pf13555, Pf13558	0.984	0.982	0.988	8944000	9008000	8977000	8798000	8842000	8866000		0.984292	0.00665796	47.994	0	590.972	70
FALSE	High	Master Protein	Q99426	Tubulin-folding cofactor B OS=Homo sapiens GN=TBCB PE=1 SV=2	0	52.494	38.9344	10	21	10	1	244	27.308	5.15		1155	TBCB	ENSG00000105254.11	19	cell differentiation;development	cytoplasm;cytoskeleton;cytosol	protein binding	Pf01302, Pf14560	0.989	0.999	0.993	8905000	8307000	8650000	8809000	8296000	8588000		0.993465	0.817456	7.577	0	65.8304	10
FALSE	High	Master Protein	H7C2I1	Protein arginine N-methyltransferase 1 OS=Homo sapiens GN=PRMT1 PE=1 SV=1	0	157.81	45.0135	18	75	18	1	371	42.434	5.35		3276	PRMT1	ENSG00000126457.21	19	cell organization and biogenesis;metabolic process;regulation of biological process;response to stimulus	cytoplasm;cytosol;nucleus	catalytic activity;DNA binding;nucleotide binding;protein binding;RNA binding	Pf05175, Pf06325, Pf08241, Pf12847, Pf13649, Pf13847	0.969	0.994	0.992	8900000	8734000	8781000	8622000	8683000	8713000		0.984971	0.0975305	88.615	0	235.827	18
FALSE	High	Master Protein	P51148	Ras-related protein Rab-5C OS=Homo sapiens GN=RAB5C PE=1 SV=2	0	102.059	56.0185	10	71	7	1	216	23.468	8.41		5878	RAB5C	ENSG00000108774.14	17	cell organization and biogenesis;regulation of biological process;response to stimulus;transport	endosome;membrane	catalytic activity;nucleotide binding;protein binding	Pf00009, Pf00025, Pf00071, Pf04670, Pf08477	0.942	0.999	0.942	8894000	8697000	9032000	8378000	8686000	8506000		0.960448	0.0568839	283.804	2	208.124	10
FALSE	High	Master Protein	P25789	Proteasome subunit alpha type-4 OS=Homo sapiens GN=PSMA4 PE=1 SV=1	0	92.0894	47.5096	12	56	12	1	261	29.465	7.72		5685	PSMA4	ENSG00000041357.15	15	metabolic process;regulation of biological process;response to stimulus;transport	cytoplasm;cytosol;nucleus;proteasome	catalytic activity;protein binding	Pf00227, Pf10584	0.967	1.03	1.001	8884000	8521000	8674000	8594000	8776000	8679000		0.99885	0.937705	60.054	0	160.476	12
FALSE	High	Master Protein	P27695	DNA-(apurinic or apyrimidinic site) lyase OS=Homo sapiens GN=APEX1 PE=1 SV=2	0	163.881	54.4025	18	70	18	1	318	35.532	8.12		328	APEX1	ENSG00000100823.11	14	cell organization and biogenesis;cellular homeostasis;metabolic process;regulation of biological process;response to stimulus	cytoplasm;endoplasmic reticulum;mitochondrion;nucleus;ribosome	catalytic activity;DNA binding;metal ion binding;protein binding;RNA binding	Pf03372, Pf14529	0.979	0.996	1.022	8881000	9035000	8668000	8693000	9002000	8863000		0.999022	0.95334	291.864	0	240.121	18
FALSE	High	Master Protein	Q04837	Single-stranded DNA-binding protein, mitochondrial OS=Homo sapiens GN=SSBP1 PE=1 SV=1	0	69.4633	58.7838	9	42	9	1	148	17.249	9.6		6742	SSBP1	ENSG00000106028.10	7	cell organization and biogenesis;metabolic process;regulation of biological process	mitochondrion;nucleus;organelle lumen	DNA binding;protein binding;RNA binding	Pf00436	1.075	0.929	1.044	8879000	9249000	8495000	9548000	8596000	8867000		1.01457	0.736745	128.155	0	131.787	9
FALSE	High	Master Protein	Q01518	Adenylyl cyclase-associated protein 1 OS=Homo sapiens GN=CAP1 PE=1 SV=5	0	145.096	39.5789	20	84	17	1	475	51.869	8.06		10487	CAP1	ENSG00000131236.16	1	cell organization and biogenesis;cellular component movement;regulation of biological process;response to stimulus;transport	cytoplasm;cytoskeleton;extracellular;membrane;organelle lumen	protein binding	Pf01213, Pf07986, Pf08603	0.986	0.952	0.99	8869000	9009000	8846000	8744000	8575000	8756000		0.975715	0.0503155	31.903	4	245.697	20
FALSE	High	Master Protein	P0A6T5	GTP cyclohydrolase 1 OS=Escherichia coli (strain K12) GN=folE PE=1 SV=2	0	19.2509	22.973	5	7	5	1	222	24.815	7.33		949040	folE; SH08_14950; SH03_14850; SH06_15155; SH04_14840; SH07_14845; SF31_15155			metabolic process	cytoplasm;cytosol	catalytic activity;metal ion binding;nucleotide binding	Pf01227	1.276	1.281	1.452	8862000	8554000	7823000	11300000	10960000	11360000		1.33207	0.00564782	2.831	0	16.5349	5
FALSE	High	Master Protein	P46060	Ran GTPase-activating protein 1 OS=Homo sapiens GN=RANGAP1 PE=1 SV=1	0	284.182	48.7223	31	138	31	1	587	63.502	4.68		5905	RANGAP1	ENSG00000100401.19	22	cell organization and biogenesis;metabolic process;regulation of biological process;response to stimulus	chromosome;cytoplasm;cytoskeleton;cytosol;membrane;nucleus	enzyme regulator activity;protein binding;RNA binding	Pf07834, Pf13855	1.002	1.018	0.984	8839000	8961000	8894000	8859000	9124000	8753000		1.00157	0.913161	155.152	0	443.384	31
FALSE	High	Master Protein	G3XAN8	Mitochondrial import inner membrane translocase subunit Tim8 B OS=Homo sapiens GN=TIMM8B PE=1 SV=1	0	19.2761	37.7551	4	12	4	1	98	11.148	8.1		26521	TIMM8B	ENSG00000150779.11	11	transport	membrane;mitochondrion	metal ion binding;transporter activity	Pf02953	0.999	1.04	1.02	8826000	8535000	8509000	8821000	8879000	8676000		1.01956	0.242021	6.197	0	32.477	4
FALSE	High	Master Protein	P35580	Myosin-10 OS=Homo sapiens GN=MYH10 PE=1 SV=3	0	764.63	51.5182	112	299	91	1	1976	228.858	5.54		4628	MYH10	ENSG00000133026.12	17	cell organization and biogenesis;cell proliferation;cellular component movement;metabolic process;regulation of biological process;transport	cytoplasm;cytosol;membrane;nucleus	catalytic activity;motor activity;nucleotide binding;protein binding;transporter activity	Pf00063, Pf00769, Pf01496, Pf01576, Pf02736, Pf04111, Pf05622, Pf05911, Pf06637, Pf07888, Pf09726, Pf12128, Pf13094, Pf13514	0.976	0.982	1.006	8824000	8777000	8645000	8610000	8619000	8697000		0.987808	0.17517	78.792	1	1006.62	112
FALSE	High	Master Protein	P78417	Glutathione S-transferase omega-1 OS=Homo sapiens GN=GSTO1 PE=1 SV=2	0	79.4773	48.5477	18	50	18	1	241	27.548	6.6		9446	GSTO1	ENSG00000148834.12	10	cellular homeostasis;metabolic process;regulation of biological process;response to stimulus	cytoplasm;cytosol	antioxidant activity;catalytic activity;protein binding	Pf00043, Pf00462, Pf02798, Pf13409, Pf13417, Pf14497	0.969	1.046	1.022	8820000	8297000	8668000	8543000	8679000	8855000		1.01132	0.623331	47.697	0	140.663	18
FALSE	High	Master Protein	P84077	ADP-ribosylation factor 1 OS=Homo sapiens GN=ARF1 PE=1 SV=2	0	102.16	52.4862	9	59	5	1	181	20.684	6.8		375	ARF1	ENSG00000143761.15	1	cell organization and biogenesis;cellular homeostasis;metabolic process;regulation of biological process;response to stimulus;transport	cytoplasm;cytosol;endosome;Golgi;membrane	catalytic activity;enzyme regulator activity;metal ion binding;nucleotide binding;protein binding;RNA binding;signal transducer activity	Pf00025, Pf00071, Pf00503, Pf01926, Pf04670, Pf08477, Pf09439	1	0.988	0.949	8818000	8875000	8911000	8820000	8768000	8459000		0.979063	0.237464	198.526	4	194.776	9
FALSE	High	Master Protein	I3L0A0	HCG2044781 OS=Homo sapiens GN=TMEM189-UBE2V1 PE=4 SV=1	0	69.244	24.3243	9	60	4	1	370	42.181	6.71				ENSG00000124208.16	20	metabolic process;response to stimulus	cytoplasm;membrane;nucleus	catalytic activity;protein binding	Pf00179, Pf10520	1.034	1.016	0.969	8746000	8779000	9387000	9042000	8918000	9100000		1.0055	0.837743	14.505	7	140.491	9
FALSE	High	Master Protein	Q562R1	Beta-actin-like protein 2 OS=Homo sapiens GN=ACTBL2 PE=1 SV=2	0	81.0959	25.5319	9	299	3	1	376	41.976	5.59		345651	ACTBL2	ENSG00000169067.3	5		cytoplasm;cytoskeleton	nucleotide binding;protein binding	Pf00022	0.893	0.929	1.077	8709000	8093000	8012000	7779000	7519000	8625000		0.964093	0.504863	11.452	0	607.965	9
FALSE	High	Master Protein	P15954	Cytochrome c oxidase subunit 7C, mitochondrial OS=Homo sapiens GN=COX7C PE=1 SV=1	0.000416763	9.16847	28.5714	2	6	2	1	63	7.241	10.27		1350	COX7C	ENSG00000127184.12	5	metabolic process;transport	membrane;mitochondrion	catalytic activity;transporter activity	Pf02935	1.005	0.995	1.06	8684000	8698000	8524000	8724000	8651000	9039000		1.01961	0.292728	2.981	0	16.9089	2
FALSE	High	Master Protein	Q13263	Transcription intermediary factor 1-beta OS=Homo sapiens GN=TRIM28 PE=1 SV=5	0	272.309	55.4491	33	146	33	1	835	88.493	5.77		10155	TRIM28	ENSG00000130726.11	19	cell organization and biogenesis;defense response;metabolic process;regulation of biological process;response to stimulus	chromosome;nucleus	catalytic activity;DNA binding;metal ion binding;protein binding;RNA binding	Pf00628, Pf00643	1.007	1.024	1.015	8674000	8637000	8925000	8736000	8844000	9057000		1.01528	0.364291	82.378	0	451.651	33
FALSE	High	Master Protein	P17980	26S protease regulatory subunit 6A OS=Homo sapiens GN=PSMC3 PE=1 SV=3	0	222.279	63.7813	25	119	25	1	439	49.172	5.24		5702	PSMC3	ENSG00000165916.8	11	metabolic process;regulation of biological process;response to stimulus;transport	cytoplasm;cytosol;extracellular;membrane;nucleus;organelle lumen;proteasome	catalytic activity;enzyme regulator activity;nucleotide binding;protein binding	Pf00004, Pf01078, Pf05496, Pf07724, Pf07728, Pf13191	0.983	1.022	0.974	8651000	8427000	8780000	8506000	8615000	8549000		0.99273	0.611769	196.832	0	322.484	25
FALSE	High	Master Protein	F8WCF6	Actin-related protein 2/3 complex subunit 4 OS=Homo sapiens GN=ARPC4-TTLL3 PE=3 SV=1	0	21.5783	25.9669	5	19	5	1	181	21.045	8.76				ENSG00000250151.9	3	cell organization and biogenesis;regulation of biological process	cytoplasm;cytoskeleton	protein binding	Pf05856	0.965	1.038	0.93	8640000	8412000	9030000	8337000	8728000	8398000		0.976267	0.403526	4.337	0	51.5985	5
FALSE	High	Master Protein	P12081	Histidine--tRNA ligase, cytoplasmic OS=Homo sapiens GN=HARS PE=1 SV=2	0	121.825	41.4538	22	61	16	1	509	57.374	5.88		3035	HARS	ENSG00000170445.12	5	cell organization and biogenesis;metabolic process	cytoplasm;cytosol;mitochondrion	catalytic activity;nucleotide binding	Pf00458, Pf00587, Pf03129, Pf13393	1.004	1.004	1.021	8638000	8653000	8708000	8669000	8691000	8891000		1.00969	0.357081	15.103	6	189.386	22
FALSE	High	Master Protein	P11388	DNA topoisomerase 2-alpha OS=Homo sapiens GN=TOP2A PE=1 SV=3	0	406.052	41.2802	66	159	49	1	1531	174.276	8.72		7153	TOP2A	ENSG00000131747.14	17	cell differentiation;cell division;cell organization and biogenesis;metabolic process;regulation of biological process;response to stimulus	chromosome;cytoplasm;nucleus	catalytic activity;DNA binding;metal ion binding;nucleotide binding;protein binding;RNA binding	Pf00204, Pf00521, Pf01751, Pf02518, Pf08070	0.971	0.994	0.976	8633000	8571000	8609000	8380000	8516000	8405000		0.980165	0.0391269	22.881	20	482.905	66
FALSE	High	Master Protein	Q9BZZ5	Apoptosis inhibitor 5 OS=Homo sapiens GN=API5 PE=1 SV=3	0	114.902	43.3206	21	71	1	1	524	58.968	7.34		8539	API5	ENSG00000166181.12	11	cell death;regulation of biological process	cytoplasm;membrane;nucleus;spliceosomal complex	protein binding;RNA binding	Pf05918, Pf13646	0.971	0.95	0.971	8629000	8752000	8706000	8380000	8314000	8452000		0.963928	0.0044071	17.588	16	208.97	21
FALSE	High	Master Protein	P51659	Peroxisomal multifunctional enzyme type 2 OS=Homo sapiens GN=HSD17B4 PE=1 SV=3	0	286.351	46.6033	31	115	31	1	736	79.636	8.84		3295	HSD17B4	ENSG00000133835.14	5	cell differentiation;metabolic process	membrane;mitochondrion;organelle lumen	catalytic activity;protein binding	Pf00106, Pf01575, Pf02036, Pf08659, Pf13452, Pf13561, Pf14864	0.956	1.002	0.996	8617000	8319000	8330000	8241000	8335000	8297000		0.984445	0.310059	45.416	0	361.562	31
FALSE	High	Master Protein	O00410	Importin-5 OS=Homo sapiens GN=IPO5 PE=1 SV=4	0	404.718	38.1951	37	194	34	1	1097	123.55	4.94		3843	IPO5	ENSG00000065150.18	13	regulation of biological process;response to stimulus;transport	cytoplasm;membrane;nucleus	enzyme regulator activity;protein binding;RNA binding;transporter activity	Pf02985, Pf12755, Pf13513, Pf13646	0.995	0.982	0.985	8612000	8729000	8746000	8568000	8575000	8616000		0.987427	0.109174	39.754	4	646.884	37
FALSE	High	Master Protein	P05091	Aldehyde dehydrogenase, mitochondrial OS=Homo sapiens GN=ALDH2 PE=1 SV=2	0	157.798	53.3849	23	78	19	1	517	56.346	7.05		217	ALDH2	ENSG00000111275.12	12	metabolic process	mitochondrion;organelle lumen	catalytic activity;nucleotide binding	Pf00171	0.973	0.999	0.991	8603000	8279000	8348000	8369000	8268000	8277000		0.987475	0.400149	27.943	4	257.861	23
FALSE	High	Master Protein	O14979	Heterogeneous nuclear ribonucleoprotein D-like OS=Homo sapiens GN=HNRNPDL PE=1 SV=3	0	128.915	42.619	22	90	20	1	420	46.409	9.57		9987	HNRNPDL; HNRPDL	ENSG00000152795.17	4	metabolic process;regulation of biological process	cytoplasm;nucleus;spliceosomal complex	DNA binding;nucleotide binding;protein binding;RNA binding	Pf00076, Pf08777, Pf13893, Pf14259	1.054	0.955	1.014	8587000	8987000	9228000	9047000	8586000	9360000		1.00713	0.838604	56.797	0	269.618	22
FALSE	High	Master Protein	P60953	Cell division control protein 42 homolog OS=Homo sapiens GN=CDC42 PE=1 SV=2	0	54.9176	38.2199	6	35	5	1	191	21.245	6.55		998	CDC42	ENSG00000070831.15	1	cell communication;cell differentiation;cell division;cell organization and biogenesis;cellular component movement;coagulation;metabolic process;regulation of biological process;response to stimulus;transport	cytoplasm;cytoskeleton;cytosol;membrane;vacuole	catalytic activity;nucleotide binding;protein binding	Pf00025, Pf00071, Pf08477	1.073	1.056	1.026	8535000	8461000	8849000	9160000	8939000	9082000		1.05169	0.0442039	24.119	0	118.832	6
FALSE	High	Master Protein	O95831	Apoptosis-inducing factor 1, mitochondrial OS=Homo sapiens GN=AIFM1 PE=1 SV=1	0	214.131	40.6199	22	96	22	1	613	66.859	8.95		9131	AIFM1	ENSG00000156709.13	X	cell death;cell differentiation;cell organization and biogenesis;cellular homeostasis;metabolic process;regulation of biological process;response to stimulus	cytoplasm;cytosol;membrane;mitochondrion;nucleus	catalytic activity;DNA binding;nucleotide binding;protein binding	Pf00070, Pf07992, Pf14721, Pf14962	0.953	0.972	1.002	8521000	8375000	8204000	8121000	8136000	8222000		0.975259	0.141538	32.982	0	333.968	22
FALSE	High	Master Protein	P62191	26S protease regulatory subunit 4 OS=Homo sapiens GN=PSMC1 PE=1 SV=1	0	129.649	57.5	25	78	22	1	440	49.154	6.21		5700	PSMC1	ENSG00000100764.13	14	metabolic process;regulation of biological process;response to stimulus;transport	cytoplasm;cytosol;membrane;nucleus;proteasome	catalytic activity;nucleotide binding;protein binding;RNA binding	Pf00004, Pf00910, Pf01078, Pf05496, Pf05673, Pf05729, Pf07724, Pf07726, Pf07728, Pf13191, Pf13401	0.951	0.995	1.025	8490000	8512000	8167000	8070000	8473000	8369000		0.989789	0.62998	29.303	2	229.026	25
FALSE	High	Master Protein	G3V5Z7	Proteasome subunit alpha type OS=Homo sapiens GN=PSMA6 PE=1 SV=1	0	118.089	54.3651	13	71	13	1	252	28.129	6.76				ENSG00000100902.10	14	metabolic process	cytoplasm;cytosol;nucleus;proteasome	catalytic activity	Pf00227, Pf10584	1	1.019	0.998	8484000	8376000	8500000	8484000	8533000	8480000		1.0054	0.368094	99	0	222.924	13
FALSE	High	Master Protein	Q9Y5S9	RNA-binding protein 8A OS=Homo sapiens GN=RBM8A PE=1 SV=1	0	37.2056	32.1839	6	27	6	1	174	19.877	5.72		9939	RBM8A; LOC101060541	ENSG00000265241.6	1	metabolic process;regulation of biological process;transport	cytoplasm;cytosol;nucleus;spliceosomal complex	nucleotide binding;protein binding;RNA binding	Pf00076, Pf08777, Pf13893, Pf14259	0.965	0.958	0.972	8427000	8329000	8239000	8130000	7982000	8005000		0.964873	0.0155104	41.17	0	91.7903	6
FALSE	High	Master Protein	Q9Y617	Phosphoserine aminotransferase OS=Homo sapiens GN=PSAT1 PE=1 SV=2	0	155.033	49.4595	16	91	16	1	370	40.397	7.66		29968	PSAT1	ENSG00000135069.13	9	metabolic process	cytoplasm;cytosol	catalytic activity	Pf00266	1.031	0.984	1.005	8392000	8519000	8643000	8649000	8385000	8682000		1.00634	0.674132	79.309	0	283.47	16
FALSE	High	Master Protein	B0QY89	Eukaryotic translation initiation factor 3 subunit L OS=Homo sapiens GN=EIF3L PE=1 SV=1	0	164.977	42.3394	26	94	26	1	607	70.857	6.65		51386	EIF3L	ENSG00000100129.17	22	cell organization and biogenesis;metabolic process;regulation of biological process	cytoplasm;cytosol;membrane	protein binding;RNA binding	Pf10255	0.963	0.956	0.992	8387000	8271000	8134000	8075000	7904000	8071000		0.970071	0.059064	32.982	0	292.213	26
FALSE	High	Master Protein	P51665	26S proteasome non-ATPase regulatory subunit 7 OS=Homo sapiens GN=PSMD7 PE=1 SV=2	0	71.4666	25.6173	9	30	9	1	324	37.002	6.77		5713	PSMD7	ENSG00000103035.10	16	metabolic process;regulation of biological process;response to stimulus;transport	cytosol;extracellular;membrane;nucleus;organelle lumen;proteasome	catalytic activity;protein binding	Pf01398, Pf13012	0.995	0.971	0.973	8383000	8675000	8508000	8345000	8426000	8282000		0.979934	0.170014	24.119	0	87.5509	9
FALSE	High	Master Protein	K7ELL7	Glucosidase 2 subunit beta OS=Homo sapiens GN=PRKCSH PE=1 SV=1	0	148.133	43.3645	23	85	23	1	535	60.154	4.41		5589	PRKCSH	ENSG00000130175.9	19	cell organization and biogenesis;metabolic process;regulation of biological process;response to stimulus	endoplasmic reticulum;organelle lumen	metal ion binding;protein binding;RNA binding	Pf07915, Pf12999, Pf13015	0.997	0.961	0.975	8372000	8671000	8451000	8345000	8334000	8236000		0.977289	0.152193	73.057	0	248.802	23
FALSE	High	Master Protein	P62495	Eukaryotic peptide chain release factor subunit 1 OS=Homo sapiens GN=ETF1 PE=1 SV=3	0	118.061	41.1899	16	52	16	1	437	49	5.71		2107	ETF1	ENSG00000120705.12	5	cell organization and biogenesis;metabolic process;regulation of biological process	cytoplasm;cytosol;nucleus	protein binding;RNA binding	Pf03463, Pf03464, Pf03465	1.004	0.996	0.985	8372000	8420000	8522000	8405000	8382000	8397000		0.994865	0.431012	22.714	0	171.804	16
FALSE	High	Master Protein	P39748	Flap endonuclease 1 OS=Homo sapiens GN=FEN1 PE=1 SV=1	0	150.983	49.7368	19	59	19	1	380	42.566	8.62		2237	FEN1	ENSG00000168496.3	11	cell organization and biogenesis;metabolic process;regulation of biological process;response to stimulus	membrane;mitochondrion;nucleus	catalytic activity;DNA binding;metal ion binding;protein binding	Pf00752, Pf00867, Pf01367	1.022	0.98	1.055	8354000	8691000	8525000	8542000	8518000	8998000		1.01908	0.435489	68.519	0	211.618	19
FALSE	High	Master Protein	P61889	Malate dehydrogenase OS=Escherichia coli (strain K12) GN=mdh PE=1 SV=1	0	120.699	49.6795	15	53	15	1	312	32.317	5.77		947854	mdh; SH08_20430; SH03_20325; SH06_20630; SH04_20315; SH07_20320; SF31_20715			metabolic process	cytoplasm;cytosol;membrane	catalytic activity	Pf00056, Pf02866	1.777	1.807	1.738	8347000	8195000	8530000	14830000	14810000	14820000		1.77329	0.000214209	73.989	0	187.622	15
FALSE	High	Master Protein	P08621	U1 small nuclear ribonucleoprotein 70 kDa OS=Homo sapiens GN=SNRNP70 PE=1 SV=2	0	139.211	51.4874	23	85	23	1	437	51.526	9.94		6625	SNRNP70	ENSG00000104852.14	19	metabolic process;regulation of biological process;response to stimulus	cytoplasm;nucleus;spliceosomal complex	nucleotide binding;protein binding;RNA binding	Pf00076, Pf12220, Pf13893, Pf14259	1.032	0.965	0.986	8328000	8487000	8236000	8596000	8192000	8122000		0.994371	0.794606	145.78	0	258.233	23
FALSE	High	Master Protein	P00403	Cytochrome c oxidase subunit 2 OS=Homo sapiens GN=MT-CO2 PE=1 SV=1	0	45.1004	27.7533	5	31	5	1	227	25.548	4.82		4513	COX2	ENSG00000198712.1	MT	metabolic process;response to stimulus;transport	membrane;mitochondrion	catalytic activity;metal ion binding;protein binding;transporter activity	Pf00116, Pf02790	1.013	1.052	0.968	8326000	8334000	9001000	8431000	8765000	8710000		1.00955	0.763438	18.953	0	80.3011	5
FALSE	High	Master Protein	P16615	Sarcoplasmic/endoplasmic reticulum calcium ATPase 2 OS=Homo sapiens GN=ATP2A2 PE=1 SV=1	0	205.616	32.5336	33	107	33	1	1042	114.683	5.34		488	ATP2A2	ENSG00000174437.16	12	cell organization and biogenesis;cellular homeostasis;regulation of biological process;response to stimulus;transport	endoplasmic reticulum;membrane	catalytic activity;metal ion binding;nucleotide binding;protein binding;transporter activity	Pf00122, Pf00689, Pf00690, Pf00702, Pf08282, Pf12710, Pf13246	0.968	1.015	0.99	8322000	8236000	8351000	8056000	8360000	8265000		0.990847	0.495679	13.35	0	344.8	33
FALSE	High	Master Protein	Q9H0A0	RNA cytidine acetyltransferase OS=Homo sapiens GN=NAT10 PE=1 SV=2	0	229.347	42.9268	41	98	41	1	1025	115.657	8.27		55226	NAT10	ENSG00000135372.8	11	metabolic process;regulation of biological process	membrane;nucleus	catalytic activity;nucleotide binding;protein binding;RNA binding	Pf00583, Pf05127, Pf08351, Pf13508, Pf13718, Pf13725	0.943	0.994	0.984	8312000	8099000	8138000	7837000	8049000	8005000		0.973196	0.0756137	16.604	0	277.956	41
FALSE	High	Master Protein	Q16643	Drebrin OS=Homo sapiens GN=DBN1 PE=1 SV=4	0	226.716	40.3698	30	89	30	1	649	71.385	4.45		1627	DBN1	ENSG00000113758.13	5	cell communication;cell differentiation;cell organization and biogenesis;cell proliferation;development;regulation of biological process	cytoplasm;cytoskeleton;membrane	protein binding	Pf00241	0.986	0.987	1.006	8290000	8235000	8225000	8178000	8125000	8273000		0.99297	0.31622	184.879	0	289.109	30
FALSE	High	Master Protein	O95347	Structural maintenance of chromosomes protein 2 OS=Homo sapiens GN=SMC2 PE=1 SV=2	0	337.24	41.1028	54	147	54	1	1197	135.572	8.43		10592	SMC2	ENSG00000136824.18	9	cell division;cell organization and biogenesis;metabolic process;regulation of biological process	chromosome;cytoplasm;cytosol;nucleus	catalytic activity;motor activity;nucleotide binding;protein binding	Pf01576, Pf02463, Pf04111, Pf05262, Pf05622, Pf06470, Pf08317, Pf09726, Pf09731, Pf10174, Pf10186, Pf12128, Pf12718, Pf13166, Pf13175, Pf13304, Pf13476, Pf13555, Pf13863, Pf14362, Pf15619	0.977	1	0.997	8289000	8283000	8342000	8095000	8280000	8319000		0.99117	0.401391	21.309	0	446.628	54
FALSE	High	Master Protein	Q9H3N1	Thioredoxin-related transmembrane protein 1 OS=Homo sapiens GN=TMX1 PE=1 SV=1	0	68.2793	32.5	13	31	13	1	280	31.771	4.98		81542	TMX1	ENSG00000139921.12	14	cellular homeostasis;metabolic process;regulation of biological process;response to stimulus;transport	endoplasmic reticulum;membrane	catalytic activity	Pf00085, Pf13098	0.997	0.995	0.995	8284000	8199000	8191000	8261000	8161000	8148000		0.995785	0.49841	40.246	0	91.3859	13
FALSE	High	Master Protein	Q9P258	Protein RCC2 OS=Homo sapiens GN=RCC2 PE=1 SV=2	0	163.571	44.0613	20	69	20	1	522	56.049	8.78		55920	RCC2	ENSG00000281540.2; ENSG00000179051.13	1; CHR_HG2095_PATCH	cell division;cell organization and biogenesis;regulation of biological process;response to stimulus	chromosome;cytoplasm;cytoskeleton;cytosol;membrane;nucleus	protein binding;RNA binding	Pf00415, Pf13540	0.968	0.972	0.991	8283000	8515000	8411000	8016000	8275000	8336000		0.976913	0.187196	19.434	0	254.994	20
FALSE	High	Master Protein	P30084	Enoyl-CoA hydratase, mitochondrial OS=Homo sapiens GN=ECHS1 PE=1 SV=4	0	132.949	57.5862	16	57	16	1	290	31.367	8.07		1892	ECHS1	ENSG00000127884.4	10	metabolic process	mitochondrion;organelle lumen	catalytic activity;protein binding	Pf00378, Pf01343	0.97	1.014	0.983	8263000	7943000	8108000	8018000	8052000	7969000		0.98869	0.427792	87.587	0	177.149	16
FALSE	High	Master Protein	Q09666	Neuroblast differentiation-associated protein AHNAK OS=Homo sapiens GN=AHNAK PE=1 SV=2	0	724.272	43.871	145	272	145	1	5890	628.699	6.15		79026	AHNAK	ENSG00000124942.13	11	cell organization and biogenesis;regulation of biological process	cytoplasm;cytoskeleton;cytosol;membrane;nucleus	protein binding;RNA binding;structural molecule activity		1	0.989	0.995	8259000	8412000	8441000	8262000	8321000	8402000		0.994943	0.578631	2.279	0	755.415	145
FALSE	High	Master Protein	P82675	28S ribosomal protein S5, mitochondrial OS=Homo sapiens GN=MRPS5 PE=1 SV=2	0	85.3674	36.5116	15	36	15	1	430	47.976	9.92		64969	MRPS5	ENSG00000144029.11	2	cell organization and biogenesis;metabolic process	membrane;mitochondrion;ribosome	RNA binding;structural molecule activity	Pf00333, Pf03719	0.987	0.98	0.98	8254000	8182000	8047000	8145000	8015000	7883000		0.982028	0.208185	9	0	115.364	15
FALSE	High	Master Protein	P31153	S-adenosylmethionine synthase isoform type-2 OS=Homo sapiens GN=MAT2A PE=1 SV=1	0	126.869	50.3797	18	66	17	1	395	43.633	6.48		4144	MAT2A	ENSG00000168906.12	2	cell organization and biogenesis;metabolic process	cytosol	catalytic activity;metal ion binding;nucleotide binding;protein binding	Pf00438, Pf02772, Pf02773	0.989	0.997	1.026	8233000	8350000	8209000	8145000	8329000	8423000		1.00424	0.730021	32.405	0	207.391	18
FALSE	High	Master Protein	O00231	26S proteasome non-ATPase regulatory subunit 11 OS=Homo sapiens GN=PSMD11 PE=1 SV=3	0	197.725	54.7393	22	90	22	1	422	47.434	6.48		5717	PSMD11	ENSG00000108671.9	17	cell differentiation;cell organization and biogenesis;metabolic process;regulation of biological process;response to stimulus;transport	cytoplasm;cytosol;extracellular;membrane;nucleus;organelle lumen;proteasome	catalytic activity;protein binding;structural molecule activity	Pf01399	0.97	0.984	0.971	8232000	8075000	8168000	7985000	7942000	7930000		0.97475	0.033459	64.285	0	281.032	22
FALSE	High	Master Protein	Q9UKM9	RNA-binding protein Raly OS=Homo sapiens GN=RALY PE=1 SV=1	0	84.3451	45.7516	14	40	14	1	306	32.444	9.17		22913	RALY	ENSG00000125970.11	20	metabolic process;regulation of biological process	nucleus;spliceosomal complex	nucleotide binding;protein binding;RNA binding	Pf00076, Pf13893, Pf14259	0.962	0.931	0.998	8228000	8461000	7986000	7912000	7877000	7972000		0.962958	0.151659	14.013	0	124.755	14
FALSE	High	Master Protein	Q5T9A4	ATPase family AAA domain-containing protein 3B OS=Homo sapiens GN=ATAD3B PE=1 SV=1	0	149.042	44.4444	26	73	11	1	648	72.527	9.2		83858	ATAD3B	ENSG00000160072.19	1	transport	membrane;mitochondrion	catalytic activity;nucleotide binding;RNA binding	Pf00004, Pf00910, Pf01078, Pf05707, Pf07726, Pf07728, Pf12037, Pf13207, Pf13401	0.952	0.985	0.988	8228000	8213000	8125000	7830000	8087000	8030000		0.974803	0.102714	13.678	13	223.739	26
FALSE	High	Master Protein	P49189	4-trimethylaminobutyraldehyde dehydrogenase OS=Homo sapiens GN=ALDH9A1 PE=1 SV=3	0	160.349	39.4737	17	76	17	1	494	53.767	5.87		223	ALDH9A1		1	metabolic process	cytoplasm;cytosol	catalytic activity	Pf00171	1.017	0.954	0.978	8212000	8442000	8383000	8354000	8057000	8194000		0.982746	0.264008	46.863	0	221.425	17
FALSE	High	Master Protein	P09497	Clathrin light chain B OS=Homo sapiens GN=CLTB PE=1 SV=1	0	37.7635	25.7642	10	21	10	1	229	25.175	4.64		1212	CLTB	ENSG00000175416.12	5	cell organization and biogenesis;transport	cytosol;membrane	protein binding;structural molecule activity	Pf01086	1.068	1.004	1.034	8210000	8348000	8155000	8772000	8385000	8429000		1.03533	0.125365	58.948	0	61.0217	10
FALSE	High	Master Protein	P61970	Nuclear transport factor 2 OS=Homo sapiens GN=NUTF2 PE=1 SV=1	0	36.0079	55.9055	5	22	5	1	127	14.469	5.38		10204	NUTF2	ENSG00000102898.11	16	cell organization and biogenesis;regulation of biological process;transport	cytoplasm;cytosol;membrane;nucleus	protein binding;transporter activity	Pf02136	0.982	0.988	1.034	8209000	8356000	8181000	8061000	8253000	8460000		1.00113	0.946421	25.827	0	61.9386	5
FALSE	High	Master Protein	Q9BVP2	Guanine nucleotide-binding protein-like 3 OS=Homo sapiens GN=GNL3 PE=1 SV=2	0	120.601	42.0765	22	63	21	1	549	61.954	9.16		26354	GNL3	ENSG00000163938.16	3	cell division;cell proliferation;regulation of biological process	membrane;nucleus	nucleotide binding;protein binding;RNA binding	Pf01926, Pf02421, Pf08701	0.98	0.95	0.965	8205000	8397000	8334000	8038000	7975000	8046000		0.96483	0.0232733	21.19	1	192.54	22
FALSE	High	Master Protein	Q15738	Sterol-4-alpha-carboxylate 3-dehydrogenase, decarboxylating OS=Homo sapiens GN=NSDHL PE=1 SV=2	0	66.6913	43.4316	13	32	13	1	373	41.874	8.06		50814	NSDHL	ENSG00000147383.10	X	metabolic process;regulation of biological process;response to stimulus	endoplasmic reticulum;membrane	catalytic activity	Pf00106, Pf01073, Pf01370, Pf02719, Pf04321, Pf05368, Pf07993, Pf13460	0.967	0.951	0.983	8199000	8243000	8028000	7928000	7839000	7891000		0.966817	0.0398069	5.19	0	108.614	13
FALSE	High	Master Protein	P19367	Hexokinase-1 OS=Homo sapiens GN=HK1 PE=1 SV=3	0	214.734	39.6947	33	83	30	1	917	102.42	6.8		3098	HK1	ENSG00000156515.21	10	cellular homeostasis;metabolic process;transport	cytosol;membrane;mitochondrion	catalytic activity;nucleotide binding;protein binding	Pf00349, Pf03727	0.962	0.956	0.986	8173000	8117000	7795000	7863000	7761000	7686000		0.967822	0.146768	9	3	282.61	33
FALSE	High	Master Protein	O15067	Phosphoribosylformylglycinamidine synthase OS=Homo sapiens GN=PFAS PE=1 SV=4	0	227.907	39.9851	40	100	40	1	1338	144.643	5.76		5198	PFAS	ENSG00000178921.13	17	metabolic process;response to stimulus	cytoplasm;cytosol	catalytic activity;metal ion binding;nucleotide binding	Pf00586, Pf02769, Pf13507	0.975	1.003	0.954	8172000	7847000	8154000	7971000	7875000	7780000		0.977371	0.222497	8.306	0	310.987	40
FALSE	High	Master Protein	Q14498	RNA-binding protein 39 OS=Homo sapiens GN=RBM39 PE=1 SV=2	0	154.668	40.9434	17	71	16	1	530	59.343	10.1		9584	RBM39	ENSG00000131051.22	20	metabolic process;regulation of biological process	cytoskeleton;nucleus	nucleotide binding;protein binding;RNA binding	Pf00076, Pf13893, Pf14259, Pf15519	0.981	0.98	0.99	8143000	7976000	7784000	7988000	7820000	7704000		0.983642	0.383578	30.623	1	231.078	17
FALSE	High	Master Protein	P20962	Parathymosin OS=Homo sapiens GN=PTMS PE=1 SV=2	0	18.8318	22.549	3	55	3	1	102	11.523	4.16		5763	PTMS	ENSG00000159335.15	12	metabolic process	nucleus			1.014	1.042	1.039	8132000	8070000	8485000	8246000	8407000	8816000		1.03168	0.293088	16.783	0	85.4711	3
FALSE	High	Master Protein	O00264	Membrane-associated progesterone receptor component 1 OS=Homo sapiens GN=PGRMC1 PE=1 SV=3	0	72.4527	47.6923	10	46	9	1	195	21.658	4.7		10857	PGRMC1	ENSG00000101856.9	X	transport	endoplasmic reticulum;membrane	protein binding	Pf00173	0.981	0.939	0.973	8128000	8236000	7887000	7975000	7737000	7671000		0.964208	0.105677	99	1	144.628	10
FALSE	High	Master Protein	Q10567	AP-1 complex subunit beta-1 OS=Homo sapiens GN=AP1B1 PE=1 SV=2	0	197.444	34.6681	33	81	15	1	949	104.57	5.06		162	AP1B1		22	regulation of biological process;transport	cytosol;Golgi;membrane	protein binding;transporter activity	Pf01602, Pf02883, Pf09066, Pf12717, Pf13646	0.986	0.973	0.949	8117000	8297000	8186000	8002000	8072000	7766000		0.969106	0.0930243	13.196	16	264.131	33
FALSE	High	Master Protein	P28072	Proteasome subunit beta type-6 OS=Homo sapiens GN=PSMB6 PE=1 SV=4	0	41.3113	36.8201	7	38	7	1	239	25.341	4.92		5694	PSMB6	ENSG00000142507.9	17	metabolic process;regulation of biological process;response to stimulus;transport	cytoplasm;cytosol;nucleus;proteasome	catalytic activity;protein binding	Pf00227	1.036	1.013	0.999	8092000	8260000	8559000	8380000	8364000	8549000		1.01533	0.460865	9	0	110.403	7
FALSE	High	Master Protein	P62136	Serine/threonine-protein phosphatase PP1-alpha catalytic subunit OS=Homo sapiens GN=PPP1CA PE=1 SV=1	0	153.157	54.8485	19	71	4	1	330	37.488	6.33		5499	PPP1CA	ENSG00000172531.14	11	cell division;metabolic process;regulation of biological process;response to stimulus	cytoplasm;cytosol;membrane;nucleus	catalytic activity;metal ion binding;protein binding	Pf00149	0.991	0.952	0.958	8091000	8202000	8174000	8015000	7807000	7831000		0.966731	0.0353636	142.845	16	215.074	19
FALSE	High	Master Protein	H0Y5F5	Polyadenylate-binding protein (Fragment) OS=Homo sapiens GN=PABPC4 PE=1 SV=1	0	177.782	48.5455	28	78	2	1	550	60.206	9.41				ENSG00000090621.13	1		cytoplasm;cytosol	nucleotide binding;RNA binding	Pf00076, Pf00658, Pf13893, Pf14259	0.888	1.022	0.881	8091000	7755000	7800000	7189000	7925000	6876000		0.929967	0.211144	34.35	0	244.169	28
FALSE	High	Master Protein	Q15388	Mitochondrial import receptor subunit TOM20 homolog OS=Homo sapiens GN=TOMM20 PE=1 SV=1	0.000328577	9.58087	20.6897	3	9	3	1	145	16.288	8.6		9804	TOMM20	ENSG00000173726.10	1	cell communication;cell organization and biogenesis;metabolic process;response to stimulus;transport	membrane;mitochondrion	protein binding;transporter activity	Pf02064	0.973	0.977	0.939	8086000	7796000	7898000	7864000	7618000	7419000		0.963036	0.141164	3.642	0	22.6976	3
FALSE	High	Master Protein	Q9NSD9	Phenylalanine--tRNA ligase beta subunit OS=Homo sapiens GN=FARSB PE=1 SV=3	0	149.038	42.1053	27	87	27	1	589	66.074	6.84		10056	FARSB	ENSG00000116120.9	2	cell organization and biogenesis;metabolic process	cytoplasm;cytosol;membrane	catalytic activity;metal ion binding;nucleotide binding;protein binding;RNA binding	Pf03483, Pf03484	0.969	1.003	0.999	8085000	7940000	7923000	7832000	7964000	7916000		0.990145	0.292917	21.539	0	259.503	27
FALSE	High	Master Protein	B7Z6Z4	Myosin light polypeptide 6 OS=Homo sapiens GN=MYL6 PE=1 SV=1	0	124.78	36.9748	9	66	7	1	238	26.69	5.08		4637	MYL6	ENSG00000092841.18	12	cellular component movement	cytosol;membrane	catalytic activity;metal ion binding;motor activity;protein binding;structural molecule activity	Pf00036, Pf13405, Pf13499	0.981	0.977	1.042	8075000	8148000	7971000	7921000	7963000	8305000		0.999793	0.990803	192.07	3	198.444	9
FALSE	High	Master Protein	J3KN67	Tropomyosin alpha-3 chain OS=Homo sapiens GN=TPM3 PE=1 SV=1	0	107.435	48.7719	20	71	1	1	285	33.202	4.77		7170	TPM3	ENSG00000143549.19	1	cell organization and biogenesis;cellular component movement	cytoskeleton;cytosol	protein binding;structural molecule activity	Pf00261, Pf12718	1.035	1.056	1.028	8067000	7677000	8179000	8348000	8103000	8409000		1.03917	0.16964	130.113	2	183.407	20
FALSE	High	Master Protein	Q9BXJ9	N-alpha-acetyltransferase 15, NatA auxiliary subunit OS=Homo sapiens GN=NAA15 PE=1 SV=1	0	193.666	41.9169	41	110	1	1	866	101.208	7.42		80155	NAA15	ENSG00000164134.12	4	cell differentiation;development;metabolic process;regulation of biological process	cytoplasm;cytosol;membrane;nucleus	catalytic activity;protein binding;RNA binding	Pf12569, Pf13414	1.003	0.926	1.006	8058000	9077000	9625000	8083000	8405000	9686000		0.978102	0.785548	22.194	0	287.612	41
FALSE	High	Master Protein	Q8WXE0	Caskin-2 OS=Homo sapiens GN=CASKIN2 PE=1 SV=2	0	38.6255	13.0616	12	12	10	1	1202	126.705	7.09		57513	CASKIN2	ENSG00000177303.9	17		cytoplasm;membrane	protein binding	Pf00018, Pf00023, Pf00536, Pf07647, Pf07653, Pf12796, Pf13606, Pf13637, Pf13857, Pf14604	1.061	1.02	1.034	8054000	8312000	8063000	8542000	8478000	8335000		1.03791	0.0467876	0.719	1	38.6002	12
FALSE	High	Master Protein	P61586	Transforming protein RhoA OS=Homo sapiens GN=RHOA PE=1 SV=1	0	83.2115	44.0415	10	45	3	1	193	21.754	6.1		387	RHOA	ENSG00000067560.10	3	cell differentiation;cell division;cell organization and biogenesis;cellular component movement;metabolic process;regulation of biological process;response to stimulus;transport	cytoplasm;cytoskeleton;cytosol;endosome;membrane;mitochondrion;nucleus	catalytic activity;nucleotide binding;protein binding	Pf00025, Pf00071, Pf08477	0.988	0.989	0.983	8054000	8020000	8090000	7959000	7935000	7952000		0.98684	0.0242642	277.256	8	143.835	10
FALSE	High	Master Protein	P30566	Adenylosuccinate lyase OS=Homo sapiens GN=ADSL PE=1 SV=2	0	93.5474	29.1322	12	38	12	1	484	54.854	7.11		158	ADSL	ENSG00000239900.12	22	cell organization and biogenesis;metabolic process;response to stimulus	cytosol;mitochondrion	catalytic activity	Pf00206, Pf10397	0.975	1.009	0.895	8035000	7948000	8464000	7837000	8018000	7574000		0.958359	0.176444	9	0	124.658	12
FALSE	High	Master Protein	Q9NTJ3	Structural maintenance of chromosomes protein 4 OS=Homo sapiens GN=SMC4 PE=1 SV=2	0	308.726	43.2453	57	125	49	1	1288	147.091	6.79		10051	SMC4	ENSG00000113810.15	3	cell division;cell organization and biogenesis;metabolic process	chromosome;cytoplasm;cytosol;nucleus	nucleotide binding;protein binding	Pf02463, Pf04012, Pf04111, Pf04156, Pf06470, Pf12128, Pf13166, Pf13304, Pf13476, Pf13555	0.989	0.99	0.991	8032000	7989000	8123000	7942000	7908000	8050000		0.989894	0.235549	18.573	8	378.928	57
FALSE	High	Master Protein	P17174	Aspartate aminotransferase, cytoplasmic OS=Homo sapiens GN=GOT1 PE=1 SV=3	0	124.194	55.2058	20	61	19	1	413	46.219	7.01		2805	GOT1	ENSG00000120053.10	10	metabolic process;regulation of biological process;response to stimulus	cytoplasm;cytosol;mitochondrion;nucleus;vacuole	catalytic activity	Pf00155	1.024	0.977	0.97	8025000	8179000	8244000	8219000	7988000	7999000		0.990101	0.463423	26.213	0	197.349	20
FALSE	High	Master Protein	P28070	Proteasome subunit beta type-4 OS=Homo sapiens GN=PSMB4 PE=1 SV=4	0	95.0925	39.3939	8	40	8	1	264	29.185	5.97		5692	PSMB4	ENSG00000159377.10	1	metabolic process;regulation of biological process;response to stimulus;transport	cytoplasm;cytosol;nucleus;proteasome	catalytic activity;protein binding	Pf00227	0.969	0.916	0.944	8005000	8012000	8123000	7760000	7341000	7668000		0.943206	0.059143	45.416	0	138.462	8
FALSE	High	Master Protein	O14548	Cytochrome c oxidase subunit 7A-related protein, mitochondrial OS=Homo sapiens GN=COX7A2L PE=1 SV=2	0	15.6993	34.2105	4	5	4	1	114	12.607	9.42		9167	COX7A2L	ENSG00000115944.14	2	metabolic process;transport	membrane;mitochondrion	catalytic activity;transporter activity	Pf02238	1.088	1.08	1.115	7988000	7970000	7909000	8692000	8607000	8818000		1.09427	0.00275491	5.813	0	16.863	4
FALSE	High	Master Protein	Q9H9B4	Sideroflexin-1 OS=Homo sapiens GN=SFXN1 PE=1 SV=4	0	99.6258	50.9317	13	45	13	1	322	35.596	9.07		94081	SFXN1	ENSG00000164466.12	5	cell differentiation;transport	membrane;mitochondrion	transporter activity	Pf03820	0.966	1.025	0.957	7972000	7560000	7980000	7702000	7752000	7638000		0.982137	0.420487	23.484	0	144.019	13
FALSE	High	Master Protein	Q9GZL7	Ribosome biogenesis protein WDR12 OS=Homo sapiens GN=WDR12 PE=1 SV=2	0	81.5037	38.2979	13	34	13	1	423	47.678	5.9		55759	WDR12	ENSG00000138442.9	2	cell proliferation;metabolic process;regulation of biological process;response to stimulus	nucleus	protein binding	Pf00400, Pf08154	1.033	0.979	0.995	7957000	8041000	8100000	8221000	7871000	8057000		1.00212	0.887441	9	0	118.427	13
FALSE	High	Master Protein	Q01081	Splicing factor U2AF 35 kDa subunit OS=Homo sapiens GN=U2AF1 PE=1 SV=3	0	53.6091	30	7	45	7	1	240	27.854	8.81		7307; 102724594	U2AF1; LOC102724594; U2AF1L5	ENSG00000160201.11; ENSG00000275895.6	21	metabolic process;regulation of biological process;transport	nucleus;spliceosomal complex	metal ion binding;nucleotide binding;protein binding;RNA binding	Pf00076, Pf00642, Pf13893	1.053	1.055	1.101	7955000	7891000	7927000	8376000	8324000	8726000		1.06953	0.0460345	17.738	0	140.202	7
FALSE	High	Master Protein	Q14008	Cytoskeleton-associated protein 5 OS=Homo sapiens GN=CKAP5 PE=1 SV=3	0	452.897	42.7165	79	189	79	1	2032	225.352	7.8		9793	CKAP5	ENSG00000175216.14	11	cell division;cell organization and biogenesis;transport	chromosome;cytoplasm;cytoskeleton;cytosol;membrane	protein binding	Pf12348	1.012	0.986	1.019	7936000	8075000	7899000	8034000	7964000	8051000		1.00581	0.496301	12.003	0	584.933	79
FALSE	High	Master Protein	P23381	Tryptophan--tRNA ligase, cytoplasmic OS=Homo sapiens GN=WARS PE=1 SV=2	0	178.015	40.3397	19	75	15	1	471	53.132	6.23		7453	WARS	ENSG00000140105.17	14	metabolic process;regulation of biological process	cytoplasm;cytosol;nucleus	catalytic activity;enzyme regulator activity;nucleotide binding;protein binding	Pf00458, Pf00579	0.982	0.998	0.984	7932000	7701000	7770000	7791000	7683000	7643000		0.987779	0.317063	42.652	6	248.545	19
FALSE	High	Master Protein	Q9P2J5	Leucine--tRNA ligase, cytoplasmic OS=Homo sapiens GN=LARS PE=1 SV=2	0	298.071	43.0272	48	140	48	1	1176	134.379	7.3		51520	LARS	ENSG00000133706.17	5	cell communication;cell organization and biogenesis;metabolic process;regulation of biological process;response to stimulus;transport	cytoplasm;cytosol;endoplasmic reticulum;vacuole	catalytic activity;enzyme regulator activity;nucleotide binding;protein binding	Pf00133, Pf01406, Pf08264, Pf09334	1.01	0.963	1.007	7921000	8001000	7830000	8002000	7704000	7887000		0.993306	0.630461	26.709	0	433.128	48
FALSE	High	Master Protein	O95433	Activator of 90 kDa heat shock protein ATPase homolog 1 OS=Homo sapiens GN=AHSA1 PE=1 SV=1	0	126.012	55.6213	17	60	17	1	338	38.25	5.53		10598	AHSA1	ENSG00000100591.7	14	regulation of biological process;response to stimulus	cytoplasm;cytosol;endoplasmic reticulum	enzyme regulator activity;protein binding	Pf08327, Pf09229	0.975	0.952	0.957	7862000	8242000	8286000	7667000	7845000	7931000		0.961173	0.12949	37.986	0	165.614	17
FALSE	High	Master Protein	Q92686	Neurogranin OS=Homo sapiens GN=NRGN PE=1 SV=1	0.000328577	10.3813	19.2308	2	4	2	1	78	7.614	7.87		4900	NRGN	ENSG00000154146.12	11	metabolic process;regulation of biological process;response to stimulus	cytoplasm;membrane;nucleus	catalytic activity;protein binding	Pf00612	1.002	0.909	0.98	7841000	8034000	7408000	7855000	7301000	7260000		0.962763	0.339378	9	0	10.9019	2
FALSE	High	Master Protein	Q09028	Histone-binding protein RBBP4 OS=Homo sapiens GN=RBBP4 PE=1 SV=3	0	82.0375	29.1765	11	61	5	1	425	47.626	4.89		5928	RBBP4	ENSG00000162521.18	1	cell organization and biogenesis;metabolic process;regulation of biological process;response to stimulus	cytosol;nucleus	catalytic activity;DNA binding;protein binding	Pf00400, Pf12265	1.065	0.962	0.965	7829000	8266000	8265000	8336000	7948000	7975000		0.995854	0.869421	19.691	0	175.233	11
FALSE	High	Master Protein	P24666	Low molecular weight phosphotyrosine protein phosphatase OS=Homo sapiens GN=ACP1 PE=1 SV=3	0	62.6437	47.4684	8	38	8	1	158	18.031	6.74		52	ACP1	ENSG00000143727.15	2	metabolic process	cytoplasm;cytosol;membrane	catalytic activity;protein binding	Pf01451	0.937	1.024	0.959	7823000	7442000	7679000	7330000	7623000	7366000		0.97276	0.224827	58.948	0	128.964	8
FALSE	High	Master Protein	P60903	Protein S100-A10 OS=Homo sapiens GN=S100A10 PE=1 SV=2	0	23.8798	27.8351	4	10	4	1	97	11.196	7.37		6281	S100A10	ENSG00000197747.8	1	cell organization and biogenesis;regulation of biological process;response to stimulus	endoplasmic reticulum;membrane	metal ion binding;protein binding	Pf01023	0.927	1.009	0.966	7811000	7279000	7322000	7242000	7346000	7074000		0.966536	0.281027	99	0	24.1159	4
FALSE	High	Master Protein	P61981	14-3-3 protein gamma OS=Homo sapiens GN=YWHAG PE=1 SV=2	0	117.574	58.7045	15	135	10	1	247	28.285	4.89		7532	YWHAG	ENSG00000170027.6	7	cell organization and biogenesis;regulation of biological process;response to stimulus;transport	cytoplasm;cytosol;membrane;mitochondrion	enzyme regulator activity;protein binding;RNA binding	Pf00244	0.992	1.044	0.957	7805000	7523000	8271000	7746000	7851000	7912000		0.996186	0.904488	236.137	3	370.327	15
FALSE	High	Master Protein	P0A7W1	30S ribosomal protein S5 OS=Escherichia coli (strain K12) GN=rpsE PE=1 SV=2	0	109.759	62.2754	9	38	9	1	167	17.592	10.11		947795; 31655992	rpsE; AL524_RS00805; SH08_20780; SH03_20675; SH06_20980; SH04_20665; SH07_20670; SF31_21065			cell organization and biogenesis;metabolic process;response to stimulus	cytosol;ribosome	protein binding;RNA binding;structural molecule activity	Pf00333, Pf03719	1.699	1.676	1.778	7805000	8045000	8161000	13260000	13490000	14510000		1.71838	0.00264858	150.991	0	114.287	9
FALSE	High	Master Protein	P46778	60S ribosomal protein L21 OS=Homo sapiens GN=RPL21 PE=1 SV=2	0	59.1736	42.5	8	49	8	1	160	18.553	10.49		6144	RPL21	ENSG00000122026.10	13	cell organization and biogenesis;metabolic process;transport	cytosol;membrane;ribosome	protein binding;RNA binding;structural molecule activity	Pf01157	1.04	1.022	1.102	7766000	8116000	7683000	8078000	8294000	8463000		1.05389	0.0728437	718.686	0	126.451	8
FALSE	High	Master Protein	P0AE08	Alkyl hydroperoxide reductase subunit C OS=Escherichia coli (strain K12) GN=ahpC PE=1 SV=2	0	123.457	59.3583	13	57	13	1	187	20.748	5.17		945225	ahpC; SH08_06865; SH03_06870; SH06_07175; SH04_06860; SH07_06865; SF31_07175			cell communication;cellular homeostasis;metabolic process;regulation of biological process;response to stimulus	cytoplasm;cytosol;membrane	antioxidant activity;catalytic activity;protein binding	Pf00578, Pf08534, Pf10417	1.713	1.721	1.801	7746000	7898000	7815000	13270000	13590000	14080000		1.74517	0.00118819	656.933	0	187.36	13
FALSE	High	Master Protein	O76094	Signal recognition particle subunit SRP72 OS=Homo sapiens GN=SRP72 PE=1 SV=3	0	220.708	45.1565	29	80	29	1	671	74.56	9.26		6731	SRP72	ENSG00000174780.15	4	cell organization and biogenesis;response to stimulus;transport	cytoplasm;cytosol;endoplasmic reticulum	protein binding;RNA binding	Pf08492, Pf12569, Pf12895, Pf13424, Pf14559	0.957	0.984	0.95	7728000	7574000	7668000	7395000	7456000	7286000		0.963735	0.0146008	29.599	0	254.084	29
FALSE	High	Master Protein	P36542	ATP synthase subunit gamma, mitochondrial OS=Homo sapiens GN=ATP5C1 PE=1 SV=1	0	79.6014	35.5705	10	51	10	1	298	32.975	9.22		509	ATP5C1	ENSG00000165629.19	10	cell organization and biogenesis;metabolic process;transport	membrane;mitochondrion;organelle lumen	catalytic activity;RNA binding;transporter activity	Pf00231	0.983	0.954	0.97	7724000	7613000	7751000	7590000	7265000	7517000		0.968988	0.121637	50.795	0	136.753	10
FALSE	High	Master Protein	P61758	Prefoldin subunit 3 OS=Homo sapiens GN=VBP1 PE=1 SV=3	0	59.8338	57.3604	13	42	12	1	197	22.643	7.11		7411	VBP1		X	cell organization and biogenesis;metabolic process	cytoplasm;cytosol;nucleus	protein binding	Pf02996	1.024	0.997	1.019	7723000	7889000	7810000	7912000	7866000	7962000		1.01358	0.14565	53.117	1	102.45	13
FALSE	High	Master Protein	P18754	Regulator of chromosome condensation OS=Homo sapiens GN=RCC1 PE=1 SV=1	0	164.433	46.0808	16	99	16	1	421	44.941	7.52		1104	RCC1	ENSG00000180198.15	1	cell division;cell organization and biogenesis;regulation of biological process	chromosome;cytoplasm;membrane;nucleus	DNA binding;protein binding	Pf00415, Pf13540	0.89	1.077	0.985	7711000	7174000	7389000	6861000	7725000	7276000		0.981503	0.669351	128.155	0	261.891	16
FALSE	High	Master Protein	P51970	NADH dehydrogenase [ubiquinone] 1 alpha subcomplex subunit 8 OS=Homo sapiens GN=NDUFA8 PE=1 SV=3	0	23.0871	25	4	12	4	1	172	20.092	7.65		4702	NDUFA8	ENSG00000119421.6	9	cell organization and biogenesis;metabolic process;transport	membrane;mitochondrion	catalytic activity;protein binding	Pf06747	0.967	0.995	1.003	7709000	7500000	7446000	7458000	7462000	7467000		0.98817	0.381223	4.623	0	34.9758	4
FALSE	High	Master Protein	Q96J01	THO complex subunit 3 OS=Homo sapiens GN=THOC3 PE=1 SV=1	0	52.2783	29.9145	9	25	9	1	351	38.747	6.09		84321	THOC3	ENSG00000051596.9	5	metabolic process;transport	nucleus	protein binding;RNA binding	Pf00400, Pf08662	0.986	0.979	0.987	7690000	7711000	7815000	7581000	7552000	7712000		0.98402	0.123283	7.733	0	79.009	9
FALSE	High	Master Protein	Q13155	Aminoacyl tRNA synthase complex-interacting multifunctional protein 2 OS=Homo sapiens GN=AIMP2 PE=1 SV=2	0	64.6665	33.4375	9	25	2	1	320	35.326	8.22		7965	AIMP2	ENSG00000106305.9	7	cell death;cell differentiation;cell organization and biogenesis;development;metabolic process;regulation of biological process	cytoplasm;cytosol;membrane;nucleus	protein binding;structural molecule activity	Pf13410, Pf14497	0.96	1.039	0.964	7667000	7368000	7761000	7363000	7656000	7479000		0.986928	0.536971	10.365	6	76.3995	9
FALSE	High	Master Protein	P33176	Kinesin-1 heavy chain OS=Homo sapiens GN=KIF5B PE=1 SV=1	0	443.527	62.9283	56	169	42	1	963	109.617	6.51		3799	KIF5B	ENSG00000170759.10	10	cell differentiation;cell organization and biogenesis;cellular component movement;metabolic process;regulation of biological process;transport	cytoplasm;cytoskeleton;cytosol;membrane	catalytic activity;motor activity;nucleotide binding;protein binding	Pf00225, Pf01576, Pf02463, Pf03999, Pf04111, Pf04156, Pf05483, Pf05557, Pf05622, Pf06160, Pf07111, Pf07888, Pf10174, Pf12128, Pf13514, Pf13851, Pf14915	0.99	1.001	0.995	7646000	7681000	7702000	7571000	7686000	7660000		0.995137	0.406928	87.772	15	516.96	56
FALSE	High	Master Protein	B3KS98	Eukaryotic translation initiation factor 3 subunit H OS=Homo sapiens GN=EIF3H PE=1 SV=1	0	113.383	33.0601	14	66	14	1	366	41.555	7.33		8667	EIF3H	ENSG00000147677.10	8	cell organization and biogenesis;metabolic process;regulation of biological process	cytoplasm;cytosol;membrane	protein binding;RNA binding	Pf01398	1.006	0.944	0.972	7644000	7875000	7814000	7691000	7434000	7598000		0.973857	0.117692	34.481	0	205.486	14
FALSE	High	Master Protein	Q16658	Fascin OS=Homo sapiens GN=FSCN1 PE=1 SV=3	0	103.967	47.6673	23	55	23	1	493	54.496	7.24		6624	FSCN1	ENSG00000075618.17	7	cell organization and biogenesis;cell proliferation;cellular component movement;regulation of biological process	cytoplasm;cytoskeleton;cytosol	protein binding;RNA binding	Pf06268	0.985	0.96	0.988	7642000	7817000	7648000	7527000	7502000	7552000		0.977236	0.0845002	16.783	0	151.907	23
FALSE	High	Master Protein	Q15819	Ubiquitin-conjugating enzyme E2 variant 2 OS=Homo sapiens GN=UBE2V2 PE=1 SV=4	0	59.7309	54.4828	8	56	4	1	145	16.352	8.09		7336	UBE2V2	ENSG00000169139.11	8	cell proliferation;metabolic process;regulation of biological process;response to stimulus	cytoplasm;nucleus	catalytic activity;protein binding	Pf00179	0.902	0.905	1.009	7642000	7327000	7211000	6896000	6628000	7272000		0.937601	0.120599	99	0	141.129	8
FALSE	High	Master Protein	P09543	2',3'-cyclic-nucleotide 3'-phosphodiesterase OS=Homo sapiens GN=CNP PE=1 SV=2	0	116.775	41.8052	23	47	23	1	421	47.549	9.07		1267	CNP	ENSG00000173786.16	17	cell communication;cell differentiation;cell organization and biogenesis;metabolic process;response to stimulus	cytoplasm;membrane	catalytic activity;nucleotide binding;RNA binding	Pf01591, Pf05881, Pf08302, Pf13207, Pf13671	0.964	0.969	1.025	7624000	7644000	7479000	7349000	7410000	7667000		0.985888	0.402949	18.307	0	149.849	23
FALSE	High	Master Protein	Q15365	Poly(rC)-binding protein 1 OS=Homo sapiens GN=PCBP1 PE=1 SV=2	0	192.489	58.1461	15	130	9	1	356	37.474	7.09		5093	PCBP1	ENSG00000169564.6	2	metabolic process;regulation of biological process	cytoplasm;cytosol;membrane;nucleus	DNA binding;protein binding;RNA binding	Pf00013, Pf13014	0.971	1.018	0.962	7622000	7551000	7613000	7403000	7684000	7325000		0.983586	0.371303	315.228	0	447.025	15
FALSE	High	Master Protein	Q15631	Translin OS=Homo sapiens GN=TSN PE=1 SV=1	0	81.483	46.4912	13	29	13	1	228	26.167	6.44		7247	TSN	ENSG00000211460.11	2	metabolic process;regulation of biological process;response to stimulus	cytoplasm;cytosol;nucleus	catalytic activity;DNA binding;protein binding;RNA binding	Pf01997	1.017	0.981	0.95	7611000	7314000	7556000	7744000	7178000	7180000		0.983141	0.590131	45.416	0	102.24	13
FALSE	High	Master Protein	Q13435	Splicing factor 3B subunit 2 OS=Homo sapiens GN=SF3B2 PE=1 SV=2	0	243.77	36.5363	33	117	33	1	895	100.165	5.67		10992	SF3B2	ENSG00000087365.15	11	metabolic process	nucleus;spliceosomal complex	protein binding;RNA binding	Pf02037, Pf04037, Pf04046	1.001	0.983	0.946	7609000	7583000	7838000	7619000	7453000	7414000		0.976379	0.15612	56.797	0	344.134	33
FALSE	High	Master Protein	P38606	V-type proton ATPase catalytic subunit A OS=Homo sapiens GN=ATP6V1A PE=1 SV=2	0	164.388	43.9222	24	52	24	1	617	68.26	5.52		523	ATP6V1A	ENSG00000114573.9	3	cellular homeostasis;metabolic process;regulation of biological process;response to stimulus;transport	cytosol;membrane;mitochondrion	catalytic activity;nucleotide binding;transporter activity	Pf00006, Pf00306, Pf02874	0.963	0.972	0.99	7609000	7664000	7609000	7331000	7448000	7535000		0.975177	0.0741307	15.927	0	169.816	24
FALSE	High	Master Protein	Q9HD42	Charged multivesicular body protein 1a OS=Homo sapiens GN=CHMP1A PE=1 SV=1	0	18.8138	21.9388	7	10	7	1	196	21.689	8.06		5119	CHMP1A	ENSG00000131165.14	16	cell communication;cell division;cell organization and biogenesis;metabolic process;regulation of biological process;response to stimulus;transport	chromosome;cytoplasm;endosome;membrane;nucleus	catalytic activity;metal ion binding;protein binding	Pf03357	0.988	0.929	0.985	7599000	8134000	7712000	7506000	7558000	7596000		0.966517	0.24743	11.915	0	22.0069	7
FALSE	High	Master Protein	A0A0C4DGG9	Chromodomain-helicase-DNA-binding protein 4 OS=Homo sapiens GN=CHD4 PE=1 SV=1	0	347.395	33.0408	62	141	51	1	1937	220.336	6.02		1108	CHD4	ENSG00000111642.14	12	cell organization and biogenesis;metabolic process;regulation of biological process	cytoplasm;membrane;nucleus	catalytic activity;DNA binding;metal ion binding;nucleotide binding;protein binding	Pf00176, Pf00271, Pf00385, Pf00628, Pf04851, Pf06461, Pf06465, Pf08073, Pf08074, Pf13831	0.987	0.976	1.014	7592000	7782000	7518000	7491000	7595000	7620000		0.991875	0.532614	10.007	12	411.382	62
FALSE	High	Master Protein	Q01844	RNA-binding protein EWS OS=Homo sapiens GN=EWSR1 PE=1 SV=1	0	63.2925	15.0915	7	35	2	1	656	68.436	9.33		2130	EWSR1	ENSG00000182944.17	22	metabolic process;regulation of biological process	cytoplasm;membrane;nucleus	metal ion binding;nucleotide binding;protein binding;RNA binding	Pf00076, Pf00641, Pf14259	1.003	0.986	1.079	7576000	8217000	7541000	7599000	8102000	8137000		1.0216	0.582654	4.995	4	104.864	7
FALSE	High	Master Protein	P25786	Proteasome subunit alpha type-1 OS=Homo sapiens GN=PSMA1 PE=1 SV=1	0	136.79	52.8517	16	71	16	1	263	29.537	6.61		5682	PSMA1	ENSG00000129084.17	11	metabolic process;regulation of biological process;response to stimulus;transport	cytoplasm;cytosol;nucleus;proteasome	catalytic activity;protein binding;RNA binding	Pf00227, Pf10584	1.017	1.017	0.97	7557000	7501000	7836000	7687000	7629000	7602000		1.00105	0.946364	53.556	0	256.72	16
FALSE	High	Master Protein	P0ABT2	DNA protection during starvation protein OS=Escherichia coli (strain K12) GN=dps PE=1 SV=2	0	152.42	84.4311	17	67	17	1	167	18.684	6.11		945101	dps; SH08_07940; SH03_07940; SH06_08245; SH04_07930; SH07_07935; SF31_08245			cell organization and biogenesis;cellular homeostasis;metabolic process;response to stimulus	cytoplasm;membrane	catalytic activity;DNA binding;metal ion binding;protein binding	Pf00210	1.963	1.804	1.737	7556000	8188000	8458000	14840000	14770000	14690000		1.83043	0.00124777	999	0	222.893	17
FALSE	High	Master Protein	O15347	High mobility group protein B3 OS=Homo sapiens GN=HMGB3 PE=1 SV=4	0	96.1704	29.5	9	52	9	1	200	22.965	8.37		3149	HMGB3	ENSG00000029993.14	X	defense response;development;metabolic process;regulation of biological process;response to stimulus	chromosome;cytoplasm;nucleus	DNA binding;protein binding;RNA binding	Pf00505, Pf09011	1.003	0.978	1.009	7529000	7520000	7546000	7554000	7351000	7610000		0.996459	0.767442	9999	0	164.433	9
FALSE	High	Master Protein	P60981	Destrin OS=Homo sapiens GN=DSTN PE=1 SV=3	0	46.3128	33.9394	7	23	7	1	165	18.493	7.85		11034	DSTN	ENSG00000125868.15	20	cell organization and biogenesis;regulation of biological process	cytoplasm;cytoskeleton	protein binding	Pf00241	0.972	0.996	0.982	7499000	7267000	7334000	7286000	7236000	7203000		0.983032	0.204192	17.738	0	72.2228	7
FALSE	High	Master Protein	O43242	26S proteasome non-ATPase regulatory subunit 3 OS=Homo sapiens GN=PSMD3 PE=1 SV=2	0	207.034	56.5543	32	93	32	1	534	60.939	8.44		5709	PSMD3	ENSG00000108344.14	17	metabolic process;regulation of biological process;response to stimulus;transport	cytosol;extracellular;membrane;nucleus;organelle lumen;proteasome	catalytic activity;enzyme regulator activity;protein binding	Pf01399, Pf08375	0.988	0.99	1.006	7489000	7393000	7307000	7396000	7317000	7352000		0.994412	0.527636	40.462	0	299.452	32
FALSE	High	Master Protein	P26368	Splicing factor U2AF 65 kDa subunit OS=Homo sapiens GN=U2AF2 PE=1 SV=4	0	118.55	37.8947	13	89	11	1	475	53.467	9.09		11338	U2AF2	ENSG00000063244.12	19	metabolic process;regulation of biological process;transport	nucleus;spliceosomal complex	nucleotide binding;protein binding;RNA binding	Pf00076, Pf13893, Pf14259	1.009	0.985	0.976	7467000	7483000	7642000	7534000	7371000	7456000		0.989775	0.352863	65.608	1	260.9	13
FALSE	High	Master Protein	P28066	Proteasome subunit alpha type-5 OS=Homo sapiens GN=PSMA5 PE=1 SV=3	0	71.6518	41.4938	8	40	8	1	241	26.394	4.79		5686	PSMA5	ENSG00000143106.12	1	metabolic process;regulation of biological process;response to stimulus;transport	cytoplasm;cytosol;extracellular;nucleus;organelle lumen;proteasome	catalytic activity;protein binding	Pf00227, Pf10584	0.967	0.961	0.973	7464000	7545000	7241000	7218000	7253000	7045000		0.967011	0.100425	49.119	0	137.37	8
FALSE	High	Master Protein	E9PRY8	Elongation factor 1-delta OS=Homo sapiens GN=EEF1D PE=1 SV=1	0	180.115	31.7073	21	112	10	1	697	76.523	7.05				ENSG00000104529.17	8	metabolic process	cytosol;nucleus	RNA binding	Pf00736, Pf10587	0.995	1.009	0.992	7446000	7418000	7446000	7410000	7482000	7384000		0.998476	0.742554	18.684	15	359.352	21
FALSE	High	Master Protein	P49915	GMP synthase [glutamine-hydrolyzing] OS=Homo sapiens GN=GMPS PE=1 SV=1	0	308.349	60.4618	39	128	39	1	693	76.667	6.87		8833	GMPS	ENSG00000163655.15	3	metabolic process	cytoplasm;cytosol	catalytic activity;nucleotide binding	Pf00117, Pf00733, Pf00958, Pf01171, Pf02540, Pf03054, Pf06508, Pf07722	0.968	0.951	0.979	7436000	7518000	7436000	7197000	7152000	7282000		0.966101	0.00752348	134.388	0	424.411	39
FALSE	High	Master Protein	Q9NWB6	Arginine and glutamate-rich protein 1 OS=Homo sapiens GN=ARGLU1 PE=1 SV=1	0.000150807	11.4228	9.15751	5	7	4	1	273	33.197	10.35		55082	ARGLU1	ENSG00000134884.13	13	metabolic process;regulation of biological process	mitochondrion;nucleus	protein binding	Pf15346	1.079	0.998	0.994	7418000	7827000	7865000	8004000	7812000	7821000		1.0228	0.349516	2.511	0	19.1753	5
FALSE	High	Master Protein	X6R4W8	BUB3-interacting and GLEBS motif-containing protein ZNF207 OS=Homo sapiens GN=ZNF207 PE=1 SV=1	0	27.8031	9.85915	4	11	4	1	497	52.624	8.47				ENSG00000010244.18	17		nucleus	metal ion binding		1.059	1.09	0.98	7397000	6823000	7521000	7836000	7436000	7368000		1.04135	0.321101	20.544	0	39.4342	4
FALSE	High	Master Protein	P02359	30S ribosomal protein S7 OS=Escherichia coli (strain K12) GN=rpsG PE=1 SV=3	0	61.8644	46.9274	11	25	11	1	179	20.007	10.36		947846	rpsG; SH08_20970; SH03_20865; SH06_21170; SH04_20855; SH07_20860; SF31_21255			cell organization and biogenesis;metabolic process;regulation of biological process	cytosol;membrane;ribosome	protein binding;RNA binding;structural molecule activity	Pf00177	1.756	1.912	1.751	7389000	6874000	7338000	12970000	13140000	12850000		1.80362	7.33721e-05	76.426	0	77.2557	11
FALSE	High	Master Protein	Q9ULC4	Malignant T-cell-amplified sequence 1 OS=Homo sapiens GN=MCTS1 PE=1 SV=1	0	77.2806	59.116	9	30	9	1	181	20.542	8.82		28985	MCTS1	ENSG00000232119.7	X	cell organization and biogenesis;metabolic process;regulation of biological process;response to stimulus	cytoplasm;cytosol;membrane	protein binding;RNA binding	Pf01472	0.956	0.947	0.938	7386000	7651000	7614000	7061000	7249000	7140000		0.946978	0.0208458	124.893	0	97.7524	9
FALSE	High	Master Protein	B0YIW6	Archain 1, isoform CRA_a OS=Homo sapiens GN=ARCN1 PE=1 SV=1	0	163.731	37.5	26	88	26	1	552	61.587	5.85		372	ARCN1	ENSG00000095139.13	11	response to stimulus;transport	cytosol;membrane	RNA binding	Pf00928	1.022	1.012	0.989	7350000	7577000	7537000	7515000	7667000	7452000		1.00757	0.582043	50.795	0	248.769	26
FALSE	High	Master Protein	O60493	Sorting nexin-3 OS=Homo sapiens GN=SNX3 PE=1 SV=3	0	47.039	48.1481	10	32	8	1	162	18.751	8.66		8724	SNX3	ENSG00000112335.14	6	cell organization and biogenesis;metabolic process;regulation of biological process;response to stimulus;transport	cytoplasm;cytosol;endosome;membrane	protein binding	Pf00787	0.989	0.976	0.972	7267000	7169000	7218000	7187000	6999000	7012000		0.978942	0.11294	30.623	2	94.4501	10
FALSE	High	Master Protein	Q9BXP5	Serrate RNA effector molecule homolog OS=Homo sapiens GN=SRRT PE=1 SV=1	0	210.364	38.4703	41	100	41	1	876	100.604	5.96		51593	SRRT	ENSG00000087087.18	7	cell proliferation;metabolic process;regulation of biological process;response to stimulus	cytoplasm;nucleus	DNA binding;nucleotide binding;protein binding;RNA binding	Pf04959, Pf12066	0.982	1.005	0.986	7264000	7163000	7242000	7132000	7198000	7137000		0.990678	0.154114	34.112	0	282.984	41
FALSE	High	Master Protein	Q5T6W2	Heterogeneous nuclear ribonucleoprotein K (Fragment) OS=Homo sapiens GN=HNRNPK PE=1 SV=1	0	177.96	46.438	19	181	2	1	379	41.781	5.59		3190	HNRNPK	ENSG00000165119.20	9	metabolic process;regulation of biological process;response to stimulus	cytoplasm;membrane;nucleus;spliceosomal complex	DNA binding;protein binding;RNA binding	Pf00013, Pf08067, Pf13014, Pf13083	1.096	0.984	1.038	7250000	7713000	7212000	7949000	7588000	7485000		1.0382	0.25838	109.53	0	533.128	19
FALSE	High	Master Protein	Q5T5C7	Serine--tRNA ligase, cytoplasmic OS=Homo sapiens GN=SARS PE=1 SV=1	0	140.992	41.0448	21	70	21	1	536	61.274	7.06		6301	SARS	ENSG00000031698.12	1	metabolic process	cytoplasm;cytosol	catalytic activity;nucleotide binding;RNA binding	Pf00587, Pf02403	0.955	0.99	1.001	7229000	7328000	7238000	6904000	7254000	7245000		0.982014	0.375252	17.874	0	237.591	21
FALSE	High	Master Protein	P25205	DNA replication licensing factor MCM3 OS=Homo sapiens GN=MCM3 PE=1 SV=3	0	241.872	51.6089	38	96	38	1	808	90.924	5.77		4172	MCM3	ENSG00000112118.18	6	metabolic process	cytoplasm;membrane;nucleus	catalytic activity;DNA binding;nucleotide binding;protein binding	Pf00493, Pf01078, Pf07728, Pf14551	0.953	0.987	0.973	7222000	7117000	7169000	6879000	7021000	6976000		0.970616	0.0182968	19.039	0	298.01	38
FALSE	High	Master Protein	P38117	Electron transfer flavoprotein subunit beta OS=Homo sapiens GN=ETFB PE=1 SV=3	0	100.577	64.3137	18	66	18	1	255	27.826	8.1		2109	ETFB	ENSG00000105379.9	19	metabolic process;transport	cytosol;mitochondrion;organelle lumen	protein binding	Pf01012	0.989	0.995	0.992	7214000	7171000	7137000	7133000	7134000	7084000		0.992055	0.114877	72.564	0	204.812	18
FALSE	High	Master Protein	P30520	Adenylosuccinate synthetase isozyme 2 OS=Homo sapiens GN=ADSS PE=1 SV=3	0	122.766	37.7193	15	63	15	1	456	50.066	6.55		159	ADSS	ENSG00000035687.9	1	metabolic process;response to stimulus	cytoplasm;cytosol;membrane	catalytic activity;metal ion binding;nucleotide binding;protein binding	Pf00709	0.962	0.981	0.971	7205000	6920000	6930000	6929000	6788000	6729000		0.971076	0.153224	17.233	0	198.499	15
FALSE	High	Master Protein	Q96CX2	BTB/POZ domain-containing protein KCTD12 OS=Homo sapiens GN=KCTD12 PE=1 SV=1	0	95.8778	40.6154	15	64	15	1	325	35.679	5.64		115207	KCTD12	ENSG00000178695.5	13	cell organization and biogenesis;transport	membrane	protein binding;RNA binding;transporter activity	Pf02214	0.964	0.981	0.992	7190000	7297000	7129000	6930000	7156000	7075000		0.978951	0.145255	20.544	0	207.199	15
FALSE	High	Master Protein	Q9UHD8	Septin-9 OS=Homo sapiens GN=SEPT9 PE=1 SV=2	0	184.516	49.1468	29	74	29	1	586	65.361	8.97		10801	SEPT9	ENSG00000184640.17	17	cell division;cell organization and biogenesis;regulation of biological process	cytoplasm;cytoskeleton	catalytic activity;nucleotide binding;protein binding	Pf00735, Pf01926, Pf03193, Pf04548	0.972	0.955	0.97	7141000	7286000	7295000	6941000	6961000	7079000		0.965887	0.0207648	17.047	0	241.519	29
FALSE	High	Master Protein	A6NFX8	ADP-sugar pyrophosphatase OS=Homo sapiens GN=NUDT5 PE=1 SV=1	0	71.8611	34.9138	9	37	9	1	232	25.879	5.19				ENSG00000165609.12	10			catalytic activity	Pf00293	1.013	0.987	0.987	7132000	7159000	7321000	7222000	7069000	7225000		0.995558	0.704183	30.623	0	136.153	9
FALSE	High	Master Protein	Q9UHV9	Prefoldin subunit 2 OS=Homo sapiens GN=PFDN2 PE=1 SV=1	0	61.9759	74.026	11	30	11	1	154	16.638	6.58		5202	PFDN2	ENSG00000143256.4	1	metabolic process;regulation of biological process	cytoplasm;cytosol;mitochondrion;nucleus	protein binding	Pf01920	0.992	0.966	1.001	7129000	7322000	7154000	7074000	7071000	7165000		0.986346	0.244755	62.096	0	97.3045	11
FALSE	High	Master Protein	A0A0A0MSE2	Hydroxyacyl-coenzyme A dehydrogenase, mitochondrial OS=Homo sapiens GN=HADH PE=1 SV=1	0	76.2206	28.7179	13	48	13	1	390	42.097	9.26				ENSG00000138796.16	4	metabolic process	mitochondrion	catalytic activity;nucleotide binding	Pf00070, Pf00725, Pf01210, Pf01266, Pf02737, Pf03721	0.952	0.961	0.948	7128000	7027000	7098000	6783000	6755000	6730000		0.953654	0.00235354	24.119	0	117.535	13
FALSE	High	Master Protein	P62314	Small nuclear ribonucleoprotein Sm D1 OS=Homo sapiens GN=SNRPD1 PE=1 SV=1	0	25.9736	37.8151	4	9	4	1	119	13.273	11.56		6632	SNRPD1	ENSG00000167088.10	18	cell organization and biogenesis;metabolic process;transport	cytoplasm;cytosol;nucleus;spliceosomal complex	protein binding;RNA binding	Pf01423	1.027	1.025	1.002	7116000	7616000	6861000	7307000	7809000	6878000		1.01857	0.721604	55.234	0	27.3621	4
FALSE	High	Master Protein	P16152	Carbonyl reductase [NADPH] 1 OS=Homo sapiens GN=CBR1 PE=1 SV=3	0	112.667	68.5921	15	59	12	1	277	30.356	8.32		873; 54093	CBR1; SETD4	ENSG00000159228.12	21	cell differentiation;metabolic process	cytoplasm;cytosol	catalytic activity	Pf00106, Pf01370, Pf08659, Pf13561	0.974	0.954	1.006	7114000	7506000	6960000	6929000	7161000	6999000		0.977247	0.429076	32.839	3	201.31	15
FALSE	High	Master Protein	P61803	Dolichyl-diphosphooligosaccharide--protein glycosyltransferase subunit DAD1 OS=Homo sapiens GN=DAD1 PE=1 SV=3	0	12.2192	26.5487	3	7	3	1	113	12.489	7.08		1603	DAD1	ENSG00000129562.10	14	cell death;metabolic process;regulation of biological process;response to stimulus	endoplasmic reticulum;membrane	catalytic activity	Pf02109	1.027	0.939	0.962	7083000	7170000	7130000	7276000	6732000	6861000		0.975962	0.40637	3.642	0	20.7383	3
FALSE	High	Master Protein	P00367	Glutamate dehydrogenase 1, mitochondrial OS=Homo sapiens GN=GLUD1 PE=1 SV=2	0	214.619	48.2079	23	96	7	1	558	61.359	7.8		2746	GLUD1	ENSG00000148672.8	10	cell organization and biogenesis;metabolic process;regulation of biological process	cytoplasm;mitochondrion;organelle lumen	catalytic activity;nucleotide binding;protein binding	Pf00208, Pf02812	1.019	0.967	1	7081000	7277000	7152000	7214000	7036000	7150000		0.994886	0.66064	32.982	17	344.774	23
FALSE	High	Master Protein	Q9H3U1	Protein unc-45 homolog A OS=Homo sapiens GN=UNC45A PE=1 SV=1	0	236.176	42.6907	37	96	37	1	944	103.011	6.07		55898	UNC45A	ENSG00000140553.17	15	cell differentiation;development;metabolic process	cytoplasm;cytosol;Golgi;nucleus	protein binding	Pf00515, Pf07719, Pf11701, Pf12895, Pf13181, Pf13414, Pf13424, Pf13432, Pf14559	0.972	0.995	0.967	7046000	6964000	7151000	6849000	6931000	6915000		0.977978	0.0852915	12.268	0	289.064	37
FALSE	High	Master Protein	P0AEU7	Chaperone protein Skp OS=Escherichia coli (strain K12) GN=skp PE=1 SV=1	0	38.8237	33.5404	6	14	6	1	161	17.677	9.7		944861	skp; SH08_04640; SH03_04630; SH06_04940; SH04_04620; SH07_04625; SF31_04940			cell organization and biogenesis;metabolic process;regulation of biological process;transport	cytosol	protein binding	Pf03938	1.852	1.757	1.71	7040000	7312000	7322000	13040000	12850000	12520000		1.77217	3.33993e-05	25.827	0	48.8868	6
FALSE	High	Master Protein	P68366	Tubulin alpha-4A chain OS=Homo sapiens GN=TUBA4A PE=1 SV=1	0	262.598	46.2054	21	464	5	1	448	49.892	5.06		7277	TUBA4A	ENSG00000127824.13	2	cell organization and biogenesis;transport	cytoplasm;cytoskeleton;cytosol;extracellular	catalytic activity;nucleotide binding;protein binding;structural molecule activity	Pf00091, Pf03953	1.054	0.983	1.02	7035000	7354000	7106000	7413000	7227000	7248000		1.01828	0.323907	347.07	4	1324.27	21
FALSE	High	Master Protein	Q9NZZ3	Charged multivesicular body protein 5 OS=Homo sapiens GN=CHMP5 PE=1 SV=1	0	44.1843	31.5068	6	29	6	1	219	24.555	4.83		51510	CHMP5	ENSG00000086065.13	9	cell organization and biogenesis;regulation of biological process;transport	cytoplasm;cytosol;endosome;membrane;nucleus	protein binding	Pf03357	0.965	1.022	1	7030000	6900000	7413000	6785000	7049000	7411000		0.995408	0.897617	36.276	0	93.1571	6
FALSE	High	Master Protein	O00567	Nucleolar protein 56 OS=Homo sapiens GN=NOP56 PE=1 SV=4	0	185.854	49.3266	28	72	28	1	594	66.009	9.19		10528	NOP56	ENSG00000101361.16	20	metabolic process	cytoplasm;membrane;nucleus	protein binding;RNA binding	Pf01798, Pf08060, Pf08156	0.971	0.954	0.994	7020000	7108000	6770000	6816000	6778000	6729000		0.972485	0.193491	37.075	0	230.006	28
FALSE	High	Master Protein	Q9NYF8	Bcl-2-associated transcription factor 1 OS=Homo sapiens GN=BCLAF1 PE=1 SV=2	0	249.076	37.6087	38	102	3	1	920	106.059	9.98		9774	BCLAF1	ENSG00000029363.16	6	cell death;metabolic process;regulation of biological process;response to stimulus	cytoplasm;nucleus	DNA binding;protein binding;RNA binding	Pf15440	0.968	0.968	0.978	7013000	6983000	7049000	6787000	6759000	6895000		0.9713	0.0247306	87.297	33	303.043	38
FALSE	High	Master Protein	O75475	PC4 and SFRS1-interacting protein OS=Homo sapiens GN=PSIP1 PE=1 SV=1	0	166.222	44.3396	25	76	24	1	530	60.067	9.13		11168	PSIP1	ENSG00000164985.14	9	cell organization and biogenesis;metabolic process;regulation of biological process;response to stimulus;transport	cytosol;nucleus	DNA binding;metal ion binding;protein binding;RNA binding	Pf00855, Pf11467	0.996	0.979	1.012	7008000	6990000	6932000	6981000	6846000	7012000		0.995652	0.627745	34.622	1	237.141	25
FALSE	High	Master Protein	O75947	ATP synthase subunit d, mitochondrial OS=Homo sapiens GN=ATP5H PE=1 SV=3	0	66.3228	76.3975	12	43	12	1	161	18.479	5.3		10476	ATP5H	ENSG00000167863.11	17	cell organization and biogenesis;metabolic process;transport	cytosol;membrane;mitochondrion	catalytic activity;transporter activity	Pf05873	0.974	0.995	0.996	7000000	6802000	6803000	6817000	6766000	6777000		0.98811	0.340066	99	0	116.237	12
FALSE	High	Master Protein	P36683	Aconitate hydratase B OS=Escherichia coli (strain K12) GN=acnB PE=1 SV=3	0	236.17	51.0983	38	111	38	1	865	93.439	5.4		944864	acnB; SH08_04325; SH03_04330; SH06_04640; SH04_04320; SH07_04325; SF31_04640			metabolic process;regulation of biological process	cytosol	catalytic activity;metal ion binding;protein binding;RNA binding	Pf00330, Pf06434, Pf11791	1.706	1.74	1.708	6991000	6966000	6940000	11920000	12120000	11850000		1.71747	0.000171776	25.303	0	336.593	38
FALSE	High	Master Protein	Q9P2R7	Succinyl-CoA ligase [ADP-forming] subunit beta, mitochondrial OS=Homo sapiens GN=SUCLA2 PE=1 SV=3	0	92.8539	42.7646	21	45	21	1	463	50.285	7.42		8803	SUCLA2	ENSG00000136143.14	13	metabolic process	mitochondrion;organelle lumen	catalytic activity;metal ion binding;nucleotide binding;protein binding	Pf00549, Pf01071, Pf02222, Pf08442, Pf13535, Pf13549	0.971	0.966	0.925	6988000	6883000	7101000	6783000	6647000	6568000		0.953557	0.0217379	11.915	0	125.088	21
FALSE	High	Master Protein	Q9NUU7	ATP-dependent RNA helicase DDX19A OS=Homo sapiens GN=DDX19A PE=1 SV=1	0	147.828	47.9079	24	60	5	1	478	53.941	6.58		55308	DDX19A	ENSG00000168872.16	16	metabolic process;regulation of biological process;transport	cytoplasm;membrane;nucleus;spliceosomal complex	catalytic activity;nucleotide binding;protein binding;RNA binding	Pf00270, Pf00271	0.985	1.031	0.983	6988000	6850000	6970000	6886000	7063000	6855000		0.999808	0.987282	30.623	16	179.506	24
FALSE	High	Master Protein	H7BY58	Protein-L-isoaspartate O-methyltransferase OS=Homo sapiens GN=PCMT1 PE=1 SV=1	0	86.6412	38.8112	11	41	11	1	286	30.339	6.73		5110	PCMT1	ENSG00000120265.16	6	metabolic process	cytoplasm;cytosol	catalytic activity;protein binding	Pf01135, Pf01209, Pf05175, Pf06325, Pf08241, Pf12847, Pf13489, Pf13659, Pf13847	1.001	0.982	0.966	6964000	6743000	6935000	6971000	6623000	6699000		0.983093	0.416934	18.684	0	135.838	11
FALSE	High	Master Protein	Q9UHD1	Cysteine and histidine-rich domain-containing protein 1 OS=Homo sapiens GN=CHORDC1 PE=1 SV=2	0	138.148	48.494	16	56	16	1	332	37.466	7.87		26973	CHORDC1	ENSG00000110172.11	11	metabolic process;regulation of biological process		metal ion binding;nucleotide binding;protein binding	Pf04968, Pf04969	0.957	0.993	0.992	6947000	6670000	6840000	6648000	6625000	6788000		0.980642	0.250822	67.129	0	184.769	16
FALSE	High	Master Protein	O15355	Protein phosphatase 1G OS=Homo sapiens GN=PPM1G PE=1 SV=1	0	232.197	49.4505	26	77	26	1	546	59.235	4.36		5496	PPM1G	ENSG00000115241.10	2	metabolic process;regulation of biological process	cytoplasm;membrane;nucleus	catalytic activity;metal ion binding;protein binding	Pf00481	1.032	0.975	0.985	6935000	6935000	7279000	7153000	6762000	7173000		0.997116	0.913817	99	0	259.245	26
FALSE	High	Master Protein	P25788	Proteasome subunit alpha type-3 OS=Homo sapiens GN=PSMA3 PE=1 SV=2	0	79.9583	38.8235	12	46	12	1	255	28.415	5.33		5684	PSMA3	ENSG00000100567.12	14	metabolic process;regulation of biological process;response to stimulus;transport	cytoplasm;cytosol;nucleus;proteasome	catalytic activity;nucleotide binding;protein binding	Pf00227, Pf10584	1.04	0.989	1.018	6911000	7240000	6933000	7184000	7162000	7060000		1.01527	0.423917	57.78	0	141.227	12
FALSE	High	Master Protein	P25685	DnaJ homolog subfamily B member 1 OS=Homo sapiens GN=DNAJB1 PE=1 SV=4	0	84.9295	44.4118	18	50	17	1	340	38.02	8.63		3337	DNAJB1	ENSG00000132002.7	19	cell communication;cell organization and biogenesis;cellular homeostasis;coagulation;metabolic process;regulation of biological process;response to stimulus	cytoplasm;cytosol;membrane;mitochondrion;nucleus	catalytic activity;enzyme regulator activity;metal ion binding;nucleotide binding;protein binding	Pf00226, Pf01556	1.013	0.961	0.949	6906000	7144000	7397000	6996000	6862000	7021000		0.973516	0.312891	18.307	1	132.485	18
FALSE	High	Master Protein	Q16629	Serine/arginine-rich splicing factor 7 OS=Homo sapiens GN=SRSF7 PE=1 SV=1	0	56.9962	33.6134	10	40	9	1	238	27.35	11.82		6432	SRSF7	ENSG00000115875.18	2	metabolic process;regulation of biological process;transport	cytoplasm;nucleus	metal ion binding;nucleotide binding;protein binding;RNA binding	Pf00076, Pf13893, Pf14259	0.932	0.928	0.992	6886000	6582000	6392000	6421000	6111000	6341000		0.950302	0.139072	27.48	0	110.001	10
FALSE	High	Master Protein	Q969H8	Myeloid-derived growth factor OS=Homo sapiens GN=MYDGF PE=1 SV=1	0	36.9856	27.1676	6	15	6	1	173	18.783	6.68		56005	C19orf10; MYDGF	ENSG00000074842.7	19	cell death;regulation of biological process	extracellular;organelle lumen	protein binding	Pf10572	0.961	1.037	1.005	6886000	6467000	6514000	6617000	6704000	6548000		1.0001	0.99656	50.795	0	46.7474	6
FALSE	High	Master Protein	Q9Y2W1	Thyroid hormone receptor-associated protein 3 OS=Homo sapiens GN=THRAP3 PE=1 SV=2	0	210.545	33.7173	35	89	34	1	955	108.601	10.15		9967	THRAP3	ENSG00000054118.13	1	metabolic process;regulation of biological process;response to stimulus	nucleus	DNA binding;nucleotide binding;protein binding;receptor activity;RNA binding	Pf15440	0.971	0.996	1	6879000	6696000	6756000	6678000	6667000	6759000		0.988835	0.302315	23.851	0	259.626	35
FALSE	High	Master Protein	O14818	Proteasome subunit alpha type-7 OS=Homo sapiens GN=PSMA7 PE=1 SV=1	0	76.1448	50	13	36	13	1	248	27.87	8.46		5688	PSMA7	ENSG00000101182.14	20	metabolic process;regulation of biological process;response to stimulus;transport	cytoplasm;cytosol;nucleus;proteasome	catalytic activity;protein binding	Pf00227, Pf10584	0.999	0.959	1.043	6861000	6882000	6776000	6852000	6602000	7066000		1.00005	0.998271	25.827	0	116.127	13
FALSE	High	Master Protein	Q9Y2B0	Protein canopy homolog 2 OS=Homo sapiens GN=CNPY2 PE=1 SV=1	0	77.5028	56.5934	11	26	11	1	182	20.639	4.92		10330	CNPY2	ENSG00000257727.5	12	regulation of biological process;response to stimulus	endoplasmic reticulum	protein binding	Pf11938	0.97	0.869	0.93	6852000	7224000	6646000	6648000	6276000	6179000		0.92187	0.0731997	122.285	0	73.2852	11
FALSE	High	Master Protein	Q96AA3	Protein RFT1 homolog OS=Homo sapiens GN=RFT1 PE=1 SV=1	0.00415121	4.221	3.32717	2	2	2	1	541	60.296	8.85		91869	RFT1	ENSG00000163933.9	3	cell organization and biogenesis;transport	membrane	transporter activity	Pf04506	1.035	1.056	0.913	6850000	6812000	7380000	7091000	7190000	6739000		0.998954	0.976082	0.202	0	5.54202	2
FALSE	High	Master Protein	O75369	Filamin-B OS=Homo sapiens GN=FLNB PE=1 SV=2	0	562.41	46.8101	97	216	87	1	2602	277.99	5.73		2317	FLNB	ENSG00000136068.14	3	cell differentiation;cell organization and biogenesis;development;regulation of biological process;response to stimulus	cytoplasm;cytoskeleton;cytosol;membrane;nucleus	protein binding;RNA binding	Pf00307, Pf00630	0.993	0.984	1.002	6849000	6957000	6828000	6800000	6846000	6845000		0.99307	0.358289	11.711	2	666.981	97
FALSE	High	Master Protein	A0A0A0MRR7	U1 small nuclear ribonucleoprotein C OS=Homo sapiens GN=SNRPC PE=1 SV=1	0	43.2868	26.6667	4	23	4	1	180	19.673	9.58		6631	SNRPC	ENSG00000124562.9	6	cell organization and biogenesis;metabolic process	nucleus;spliceosomal complex	metal ion binding;protein binding;RNA binding	Pf06220	0.952	0.986	0.947	6849000	6736000	6786000	6522000	6641000	6423000		0.961465	0.0345461	99	0	80.0928	4
FALSE	High	Master Protein	Q15382	GTP-binding protein Rheb OS=Homo sapiens GN=RHEB PE=1 SV=1	0	40.071	36.9565	9	20	9	1	184	20.485	5.92		6009	RHEB	ENSG00000106615.9	7	cell communication;metabolic process;regulation of biological process;response to stimulus	cytoplasm;cytosol;endoplasmic reticulum;Golgi;membrane;spliceosomal complex	catalytic activity;metal ion binding;nucleotide binding;protein binding	Pf00071, Pf01926, Pf08477	1.017	0.994	1.003	6824000	7048000	7083000	6941000	7003000	7107000		1.00458	0.755483	30.623	0	57.9787	9
FALSE	High	Master Protein	Q9UNE7	E3 ubiquitin-protein ligase CHIP OS=Homo sapiens GN=STUB1 PE=1 SV=2	0	92.9406	51.4851	16	54	16	1	303	34.834	5.87		10273	STUB1	ENSG00000103266.10	16	metabolic process;regulation of biological process;response to stimulus	cytoplasm;cytosol;endoplasmic reticulum;nucleus	catalytic activity;protein binding	Pf00515, Pf04564, Pf07719, Pf12895, Pf13414, Pf13424, Pf13432, Pf14559	1.01	1.029	1	6820000	6700000	6899000	6888000	6893000	6897000		1.01268	0.27402	28.936	0	146.713	16
FALSE	High	Master Protein	O75367	Core histone macro-H2A.1 OS=Homo sapiens GN=H2AFY PE=1 SV=4	0	147.482	41.129	16	74	15	1	372	39.592	9.79		9555	H2AFY	ENSG00000113648.16	5	cell organization and biogenesis;regulation of biological process	chromosome;nucleus	DNA binding;enzyme regulator activity;protein binding	Pf00125, Pf01661	1.005	0.977	0.988	6812000	6778000	6806000	6843000	6621000	6722000		0.989704	0.3894	67.129	0	276.352	16
FALSE	High	Master Protein	P13498	Cytochrome b-245 light chain OS=Homo sapiens GN=CYBA PE=1 SV=3	0.000919579	6.85432	12.8205	2	9	2	1	195	20.999	9.54		1535	CYBA	ENSG00000051523.10	16	cell organization and biogenesis;cellular homeostasis;defense response;metabolic process;regulation of biological process;response to stimulus;transport	cytoplasm;endosome;Golgi;membrane;mitochondrion;nucleus	catalytic activity;metal ion binding;protein binding	Pf05038	0.908	0.954	0.949	6808000	7144000	6565000	6181000	6814000	6232000		0.937125	0.180468	1.783	0	15.5918	2
FALSE	High	Master Protein	P08574	Cytochrome c1, heme protein, mitochondrial OS=Homo sapiens GN=CYC1 PE=1 SV=3	0	65.2806	22.7692	6	66	6	1	325	35.399	9		1537	CYC1	ENSG00000179091.4	8	metabolic process;response to stimulus;transport	membrane;mitochondrion;nucleus	metal ion binding	Pf02167	1.029	1.022	1.019	6801000	6880000	7114000	6997000	7028000	7249000		1.02303	0.26582	5.813	0	192.534	6
FALSE	High	Master Protein	F6TLX2	Glyoxalase domain-containing protein 4 OS=Homo sapiens GN=GLOD4 PE=1 SV=1	0	109.179	28.0876	14	62	4	1	502	54.685	8.7				ENSG00000167699.13	17				Pf00903, Pf12681	0.972	0.99	0.962	6794000	6648000	6803000	6603000	6579000	6544000		0.974364	0.0623998	9	9	183.102	14
FALSE	High	Master Protein	Q96PK6	RNA-binding protein 14 OS=Homo sapiens GN=RBM14 PE=1 SV=2	0	146.758	33.1839	24	81	24	1	669	69.449	9.67		10432; 100526737	RBM14; RBM14-RBM4	ENSG00000239306.4	11	cell organization and biogenesis;metabolic process;regulation of biological process;response to stimulus	cytoplasm;nucleus	nucleotide binding;protein binding;RNA binding	Pf00076, Pf13893, Pf14259	0.983	1.006	0.981	6776000	6666000	6808000	6663000	6705000	6676000		0.989827	0.247306	40.246	0	246.517	24
FALSE	High	Master Protein	Q7L014	Probable ATP-dependent RNA helicase DDX46 OS=Homo sapiens GN=DDX46 PE=1 SV=2	0	282.596	47.6237	56	125	1	1	1031	117.29	9.29		9879	DDX46	ENSG00000145833.15	5	metabolic process;regulation of biological process	membrane;nucleus	catalytic activity;nucleotide binding;RNA binding	Pf00270, Pf00271	0.95	0.992	0.976	6729000	6575000	6547000	6391000	6521000	6388000		0.972243	0.0660427	33.333	51	376.884	56
FALSE	High	Master Protein	Q7L2E3	Putative ATP-dependent RNA helicase DHX30 OS=Homo sapiens GN=DHX30 PE=1 SV=1	0	255.651	45.7286	50	108	50	1	1194	133.855	8.78		22907	DHX30	ENSG00000132153.14	3	cell organization and biogenesis;metabolic process	cytoplasm;cytosol;mitochondrion	catalytic activity;nucleotide binding;protein binding;RNA binding	Pf00270, Pf00271, Pf04408, Pf07717	0.98	0.983	1.012	6726000	6747000	6722000	6592000	6631000	6804000		0.991681	0.481117	10.345	0	330.744	50
FALSE	High	Master Protein	Q8NBS9	Thioredoxin domain-containing protein 5 OS=Homo sapiens GN=TXNDC5 PE=1 SV=2	0	93.7505	36.3426	17	43	17	1	432	47.599	5.97		81567	TXNDC5	ENSG00000239264.8	6	cellular homeostasis;metabolic process;regulation of biological process;response to stimulus;transport	endoplasmic reticulum;extracellular;organelle lumen	catalytic activity;protein binding	Pf00085, Pf13098, Pf13905	1.032	0.978	0.953	6714000	6826000	7006000	6929000	6673000	6677000		0.987005	0.499523	9.965	0	139.774	17
FALSE	High	Master Protein	P51572	B-cell receptor-associated protein 31 OS=Homo sapiens GN=BCAP31 PE=1 SV=3	0	101.436	43.9024	14	45	14	1	246	27.974	8.44		10134	BCAP31	ENSG00000185825.15	X	cell death;cellular homeostasis;regulation of biological process;response to stimulus;transport	cytosol;endoplasmic reticulum;membrane;mitochondrion	protein binding	Pf05529, Pf13870	0.971	0.98	0.966	6705000	6656000	6665000	6510000	6520000	6438000		0.972136	0.00678182	99	0	127.354	14
FALSE	High	Master Protein	P52888	Thimet oligopeptidase OS=Homo sapiens GN=THOP1 PE=1 SV=2	0	129.945	41.7997	29	57	29	1	689	78.789	6.05		7064	THOP1	ENSG00000172009.14	19	metabolic process	cytoplasm;cytosol	catalytic activity;metal ion binding;protein binding	Pf01432	0.986	0.984	0.983	6699000	6715000	6555000	6606000	6607000	6444000		0.984376	0.234512	11.743	0	169.943	29
FALSE	High	Master Protein	Q9NW64	Pre-mRNA-splicing factor RBM22 OS=Homo sapiens GN=RBM22 PE=1 SV=1	0	59.7619	41.1905	16	31	16	1	420	46.865	8.54		55696	RBM22	ENSG00000086589.11	5	cell organization and biogenesis;metabolic process;regulation of biological process;response to stimulus;transport	cytoplasm;nucleus;spliceosomal complex	metal ion binding;nucleotide binding;protein binding;RNA binding;transporter activity	Pf00076, Pf13893, Pf14259	0.981	1.006	0.918	6690000	6553000	6873000	6562000	6594000	6312000		0.967787	0.16845	9	0	72.6834	16
FALSE	High	Master Protein	Q16851	UTP--glucose-1-phosphate uridylyltransferase OS=Homo sapiens GN=UGP2 PE=1 SV=5	0	95.5052	42.7165	20	45	13	1	508	56.905	8.15		7360	UGP2	ENSG00000169764.15	2	metabolic process	cytoplasm;cytosol;nucleus	catalytic activity;metal ion binding;nucleotide binding;protein binding	Pf01704	0.981	0.993	0.982	6682000	6657000	6546000	6555000	6612000	6426000		0.985316	0.236533	9	6	140.862	20
FALSE	High	Master Protein	P10606	Cytochrome c oxidase subunit 5B, mitochondrial OS=Homo sapiens GN=COX5B PE=1 SV=2	0	43.4636	44.9612	7	26	7	1	129	13.687	8.81		1329	COX5B	ENSG00000135940.6	2	metabolic process;transport	membrane;mitochondrion	catalytic activity;metal ion binding;protein binding;transporter activity	Pf01215	0.98	0.978	0.994	6668000	6640000	6354000	6533000	6496000	6316000		0.983878	0.437288	55.234	0	74.3279	7
FALSE	High	Master Protein	Q9BPZ3	Polyadenylate-binding protein-interacting protein 2 OS=Homo sapiens GN=PAIP2 PE=1 SV=1	0.00215783	5.15816	11.811	2	3	2	1	127	14.975	4.12		51247	PAIP2	ENSG00000120727.12	5	regulation of biological process;response to stimulus	cytoplasm	protein binding;RNA binding;translation regulator activity	Pf07145	0.931	1.062	0.908	6659000	6256000	6845000	6202000	6645000	6218000		0.964828	0.365777	2.162	0	7.82876	2
FALSE	High	Master Protein	P43686	26S protease regulatory subunit 6B OS=Homo sapiens GN=PSMC4 PE=1 SV=2	0	172.118	48.3254	25	84	25	1	418	47.337	5.21		5704	PSMC4	ENSG00000281221.2; ENSG00000013275.7	19; CHR_HG2021_PATCH	metabolic process;regulation of biological process;response to stimulus;transport	cytoplasm;cytosol;membrane;nucleus;proteasome	catalytic activity;nucleotide binding;protein binding;RNA binding	Pf00004, Pf00006, Pf00910, Pf01057, Pf01078, Pf05496, Pf07724, Pf07726, Pf07728, Pf13191	0.986	1.031	0.998	6645000	6362000	6519000	6554000	6558000	6505000		1.00466	0.749048	132.352	0	235.978	25
FALSE	High	Master Protein	P33992	DNA replication licensing factor MCM5 OS=Homo sapiens GN=MCM5 PE=1 SV=5	0	215.868	47.8202	35	90	35	1	734	82.233	8.37		4174	MCM5	ENSG00000100297.15	22	cell division;metabolic process	membrane;nucleus	catalytic activity;DNA binding;nucleotide binding;protein binding	Pf00493, Pf07728, Pf14551	0.983	0.981	0.993	6642000	6616000	6763000	6530000	6490000	6716000		0.985765	0.326143	33.402	0	271.252	35
FALSE	High	Master Protein	O43447	Peptidyl-prolyl cis-trans isomerase H OS=Homo sapiens GN=PPIH PE=1 SV=1	0	36.3277	43.5028	10	24	10	1	177	19.196	8.07		10465	PPIH	ENSG00000171960.10	1	cell organization and biogenesis;metabolic process;regulation of biological process	cytoplasm;nucleus;spliceosomal complex	catalytic activity;protein binding	Pf00160	0.959	0.991	0.986	6635000	6839000	6874000	6365000	6778000	6778000		0.979015	0.428688	17.738	0	59.2103	10
FALSE	High	Master Protein	O75663	TIP41-like protein OS=Homo sapiens GN=TIPRL PE=1 SV=2	0	33.5189	23.8971	6	16	6	1	272	31.424	5.91		261726	TIPRL	ENSG00000143155.12	1	regulation of biological process;response to stimulus	cytoplasm	protein binding	Pf04176	0.993	0.982	0.947	6629000	6626000	6730000	6583000	6509000	6377000		0.974181	0.0845741	3.217	0	50.5796	6
FALSE	High	Master Protein	Q5SQP8	C-terminal-binding protein 2 OS=Homo sapiens GN=CTBP2 PE=1 SV=1	0	64.6579	25.5361	12	29	8	1	513	56.066	6.96		1488	CTBP2	ENSG00000175029.16	10	cell differentiation;metabolic process;regulation of biological process	nucleus	catalytic activity;nucleotide binding;protein binding	Pf00389, Pf02826	0.955	0.945	0.959	6626000	6714000	6563000	6327000	6347000	6295000		0.953072	0.0120526	4.754	4	89.6263	12
FALSE	High	Master Protein	C9IZQ1	Translocon-associated protein subunit alpha OS=Homo sapiens GN=SSR1 PE=1 SV=1	0	17.6465	6.37584	2	13	2	1	298	33.866	4.69				ENSG00000124783.12	6		endoplasmic reticulum;membrane		Pf03896	1.021	0.974	0.996	6624000	6872000	6754000	6765000	6694000	6727000		0.99684	0.79814	2.162	0	40.7136	2
FALSE	High	Master Protein	Q9UBQ5	Eukaryotic translation initiation factor 3 subunit K OS=Homo sapiens GN=EIF3K PE=1 SV=1	0	57.9744	41.2844	7	33	7	1	218	25.043	4.93		27335	EIF3K	ENSG00000282986.1; ENSG00000178982.9	19; CHR_HG26_PATCH	metabolic process;regulation of biological process	cytoplasm;cytosol;membrane;nucleus	protein binding;RNA binding	Pf03399, Pf10075	0.876	0.95	0.937	6607000	6366000	6616000	5791000	6047000	6196000		0.920619	0.027633	20.544	0	86.9003	7
FALSE	High	Master Protein	P42166	Lamina-associated polypeptide 2, isoform alpha OS=Homo sapiens GN=TMPO PE=1 SV=2	0	209.117	50.1441	26	88	20	1	694	75.446	7.66		7112	TMPO	ENSG00000120802.13	12	regulation of biological process	chromosome;nucleus	DNA binding;protein binding	Pf03020, Pf08198, Pf11560	0.995	1.023	0.989	6604000	6653000	6762000	6569000	6808000	6691000		1.00245	0.855377	20.102	8	293.636	26
FALSE	High	Master Protein	Q13200	26S proteasome non-ATPase regulatory subunit 2 OS=Homo sapiens GN=PSMD2 PE=1 SV=3	0	258.964	50.2203	38	109	38	1	908	100.136	5.2		5708	PSMD2	ENSG00000175166.16	3	metabolic process;regulation of biological process;response to stimulus;transport	cytoplasm;cytosol;extracellular;membrane;nucleus;organelle lumen;proteasome	catalytic activity;enzyme regulator activity;nucleotide binding;protein binding	Pf01851	0.97	0.945	1.033	6590000	6749000	6515000	6395000	6379000	6727000		0.98222	0.435256	20.229	0	306.235	38
FALSE	High	Master Protein	P50402	Emerin OS=Homo sapiens GN=EMD PE=1 SV=1	0	89.2367	46.8504	13	46	13	1	254	28.976	5.5		2010	EMD	ENSG00000102119.10	X	cell differentiation;cell organization and biogenesis;regulation of biological process;response to stimulus	cytoplasm;endoplasmic reticulum;membrane;nucleus	protein binding	Pf03020	0.969	0.963	1.013	6589000	6885000	6501000	6386000	6628000	6588000		0.981327	0.427145	38.811	0	149.231	13
FALSE	High	Master Protein	P53041	Serine/threonine-protein phosphatase 5 OS=Homo sapiens GN=PPP5C PE=1 SV=1	0	150.433	44.2886	22	63	22	1	499	56.842	6.28		5536	PPP5C	ENSG00000011485.14	19	cell organization and biogenesis;metabolic process;regulation of biological process;response to stimulus	cytoplasm;cytosol;membrane;nucleus	catalytic activity;metal ion binding;nucleotide binding;protein binding;RNA binding;signal transducer activity	Pf00149, Pf00515, Pf07719, Pf08321, Pf12895, Pf13371, Pf13414, Pf13424, Pf13432, Pf14559	0.964	0.969	0.954	6585000	6776000	6677000	6345000	6565000	6368000		0.962072	0.0494547	34.938	0	194.215	22
FALSE	High	Master Protein	P50570	Dynamin-2 OS=Homo sapiens GN=DNM2 PE=1 SV=2	0	133.481	33.908	29	58	15	1	870	98.003	7.44		1785	DNM2	ENSG00000079805.16	19	cell organization and biogenesis;metabolic process;regulation of biological process;response to stimulus;transport	cytoplasm;cytoskeleton;cytosol;endosome;Golgi;membrane;nucleus	catalytic activity;nucleotide binding;protein binding	Pf00169, Pf00350, Pf01031, Pf02212	0.95	0.963	0.973	6578000	6460000	6487000	6246000	6221000	6312000		0.961793	0.00632137	6.499	11	176.619	29
FALSE	High	Master Protein	P09960	Leukotriene A-4 hydrolase OS=Homo sapiens GN=LTA4H PE=1 SV=2	0	200.181	45.4992	24	114	24	1	611	69.241	6.18		4048	LTA4H	ENSG00000111144.9	12	metabolic process;transport	cytoplasm;cytosol;extracellular;nucleus	catalytic activity;metal ion binding;protein binding;RNA binding	Pf01433, Pf09127, Pf13485	0.988	1.011	1.002	6554000	6484000	6449000	6472000	6554000	6464000		1.00015	0.98223	25.102	0	335.649	24
FALSE	High	Master Protein	P0ABJ9	Cytochrome bd-I ubiquinol oxidase subunit 1 OS=Escherichia coli (strain K12) GN=cydA PE=1 SV=1	0	67.5631	14.9425	11	32	11	1	522	58.167	6.81		945341	cydA; SH08_07520; SH03_07520; SH06_07825; SH04_07510; SH07_07515; SF31_07825			metabolic process;transport	cytoplasm;membrane	catalytic activity;metal ion binding;protein binding	Pf00769, Pf01654	1.822	1.824	1.706	6553000	6558000	6766000	11940000	11960000	11540000		1.78297	5.95542e-05	6.197	0	106.17	11
FALSE	High	Master Protein	O94826	Mitochondrial import receptor subunit TOM70 OS=Homo sapiens GN=TOMM70 PE=1 SV=1	0	116.802	38.9803	22	46	21	1	608	67.412	7.12		9868	TOMM70A; TOMM70	ENSG00000154174.7	3	cell communication;metabolic process;response to stimulus;transport	membrane;mitochondrion	protein binding;transporter activity	Pf00515, Pf07719, Pf13414, Pf13424	0.985	0.979	0.998	6546000	6437000	6545000	6447000	6300000	6531000		0.987198	0.354712	9.701	0	142.044	22
FALSE	High	Master Protein	P36957	Dihydrolipoyllysine-residue succinyltransferase component of 2-oxoglutarate dehydrogenase complex, mitochondrial OS=Homo sapiens GN=DLST PE=1 SV=4	0	55.0739	26.0486	10	28	10	1	453	48.724	8.95		1743	DLST	ENSG00000119689.14	14	metabolic process	membrane;mitochondrion;nucleus;organelle lumen	catalytic activity	Pf00198, Pf00364	0.957	1.009	0.927	6541000	6276000	6564000	6262000	6334000	6084000		0.963831	0.123333	4.484	0	83.604	10
FALSE	High	Master Protein	Q15717	ELAV-like protein 1 OS=Homo sapiens GN=ELAVL1 PE=1 SV=2	0	124.96	46.9325	12	63	11	1	326	36.069	9.17		1994	ELAVL1	ENSG00000066044.14	19	development;metabolic process;regulation of biological process	cytoplasm;cytosol;membrane;nucleus	nucleotide binding;protein binding;RNA binding	Pf00076, Pf13893, Pf14259	0.995	0.981	1.021	6527000	6531000	6385000	6492000	6404000	6519000		0.99856	0.883175	63.938	2	234.731	12
FALSE	High	Master Protein	P27694	Replication protein A 70 kDa DNA-binding subunit OS=Homo sapiens GN=RPA1 PE=1 SV=2	0	230.426	50	28	118	28	1	616	68.095	7.21		6117	RPA1	ENSG00000132383.11	17	cell organization and biogenesis;metabolic process;regulation of biological process;response to stimulus	nucleus	DNA binding;metal ion binding;protein binding	Pf01336, Pf01485, Pf04057, Pf08646	1.011	1.008	0.98	6511000	6562000	6701000	6581000	6617000	6564000		0.999393	0.951294	99	0	371.043	28
FALSE	High	Master Protein	Q92621	Nuclear pore complex protein Nup205 OS=Homo sapiens GN=NUP205 PE=1 SV=3	0	284.553	25.7952	52	109	52	1	2012	227.776	6.19		23165	NUP205	ENSG00000155561.14	7	cell organization and biogenesis;metabolic process;regulation of biological process;transport	membrane;nucleus	protein binding;structural molecule activity	Pf11894	0.985	1.021	0.981	6504000	6369000	6570000	6404000	6505000	6443000		0.99532	0.678001	5.026	0	345.833	52
FALSE	High	Master Protein	P0A7U3	30S ribosomal protein S19 OS=Escherichia coli (strain K12) GN=rpsS PE=1 SV=2	0	38.1049	48.913	5	12	5	1	92	10.424	10.52		947811; 31655999	rpsS; AL524_RS00870; SH08_20845; SH03_20740; SH06_21045; SH04_20730; SH07_20735; SF31_21130			cell organization and biogenesis;metabolic process	cytosol;ribosome	RNA binding;structural molecule activity	Pf00203	1.798	1.672	1.663	6501000	7120000	7303000	11690000	11900000	12150000		1.70809	0.000313885	99	0	36.2396	5
FALSE	High	Master Protein	P0AFD6	NADH-quinone oxidoreductase subunit I OS=Escherichia coli (strain K12) GN=nuoI PE=1 SV=1	0	14.2267	19.4444	3	5	3	1	180	20.524	5.48		946757	nuoI; SH08_15630; SH03_15530; SH06_15835; SH04_15520; SH07_15525; SF31_15835			metabolic process	cytoplasm;membrane	catalytic activity;metal ion binding	Pf00037, Pf12838, Pf13183, Pf13187, Pf13237, Pf13484, Pf13534, Pf13746, Pf14697	1.764	1.849	1.824	6492000	6031000	6116000	11450000	11150000	11160000		1.81126	2.24584e-05	1.61	0	9.11109	3
FALSE	High	Master Protein	Q92747	Actin-related protein 2/3 complex subunit 1A OS=Homo sapiens GN=ARPC1A PE=1 SV=2	0	49.1946	32.7027	12	23	12	1	370	41.543	8.18		10552	ARPC1A	ENSG00000241685.9	7	cell organization and biogenesis;regulation of biological process;response to stimulus	cytoplasm;cytoskeleton;cytosol	protein binding	Pf00400	0.999	0.974	0.933	6487000	6542000	6721000	6478000	6372000	6270000		0.968101	0.0879309	4.926	0	63.4258	12
FALSE	High	Master Protein	A9Z1X7	Serine/arginine repetitive matrix protein 1 OS=Homo sapiens GN=SRRM1 PE=1 SV=1	0	54.1995	9.20044	8	25	8	1	913	103.329	11.85		10250	SRRM1	ENSG00000133226.16	1	metabolic process;transport	cytosol;nucleus;spliceosomal complex	DNA binding;protein binding;RNA binding	Pf01480	1.003	1.072	0.961	6486000	6374000	6946000	6505000	6831000	6673000		1.01025	0.755457	1.047	0	77.9868	8
FALSE	High	Master Protein	P46977	Dolichyl-diphosphooligosaccharide--protein glycosyltransferase subunit STT3A OS=Homo sapiens GN=STT3A PE=1 SV=2	0	67.6179	19.4326	15	40	14	1	705	80.477	8.07		3703	STT3A	ENSG00000134910.12	11	metabolic process	endoplasmic reticulum;membrane	catalytic activity;metal ion binding;protein binding	Pf02516	0.988	0.97	1.025	6478000	6531000	6508000	6403000	6338000	6672000		0.994671	0.768062	3.642	1	110.938	15
FALSE	High	Master Protein	O95394	Phosphoacetylglucosamine mutase OS=Homo sapiens GN=PGM3 PE=1 SV=1	0	104.498	32.4723	17	44	13	1	542	59.814	6.25		5238	PGM3	ENSG00000013375.15	6	metabolic process	cytosol	catalytic activity;metal ion binding	Pf00408, Pf02878, Pf02879, Pf02880	0.954	0.982	0.991	6477000	6464000	6224000	6179000	6350000	6165000		0.975424	0.20366	9	3	126.74	17
FALSE	High	Master Protein	Q13162	Peroxiredoxin-4 OS=Homo sapiens GN=PRDX4 PE=1 SV=1	0	107.027	55.7196	14	135	11	1	271	30.521	6.29		10549	PRDX4	ENSG00000123131.12	X	cell organization and biogenesis;cellular homeostasis;metabolic process;regulation of biological process;transport	cytoplasm;cytosol;endoplasmic reticulum;extracellular;mitochondrion;nucleus;organelle lumen	antioxidant activity;catalytic activity;protein binding	Pf00578, Pf08534, Pf10417	1.034	1.025	0.989	6476000	6488000	6496000	6694000	6651000	6426000		1.01598	0.338346	53.117	0	374.194	14
FALSE	High	Master Protein	P0ACF0	DNA-binding protein HU-alpha OS=Escherichia coli (strain K12) GN=hupA PE=1 SV=1	0	63.6984	74.4444	7	40	7	1	90	9.529	9.58		948499	hupA; SH08_01525; SH03_01520; SH06_01520; SH04_01520; SH07_01525; SF31_01520			cell organization and biogenesis;metabolic process;regulation of biological process;response to stimulus	cytoplasm;cytosol;membrane	DNA binding;protein binding	Pf00216, Pf14908	1.851	1.847	1.847	6467000	6282000	6428000	11970000	11600000	11880000		1.84857	3.01593e-05	5622.41	0	128.73	7
FALSE	High	Master Protein	A0A0A0MRI2	Sorting nexin 6, isoform CRA_b OS=Homo sapiens GN=SNX6 PE=1 SV=1	0	108.383	43.7799	20	54	19	1	418	47.774	6.43		58533	SNX6	ENSG00000129515.18	14	cell organization and biogenesis;regulation of biological process;transport	cytoplasm;cytosol;endosome;membrane;nucleus;vacuole	protein binding	Pf00787, Pf03114, Pf09325	0.993	1.028	0.99	6461000	6306000	6315000	6417000	6485000	6250000		1.00367	0.800878	27.48	0	142.955	20
FALSE	High	Master Protein	Q86U42	Polyadenylate-binding protein 2 OS=Homo sapiens GN=PABPN1 PE=1 SV=3	0	26.828	12.7451	5	16	5	1	306	32.729	5.06		8106	PABPN1	ENSG00000100836.10	14	metabolic process;regulation of biological process;response to stimulus;transport	cytoplasm;nucleus	nucleotide binding;protein binding;RNA binding	Pf00076, Pf13893, Pf14259	0.956	0.975	1.019	6449000	6192000	6196000	6163000	6036000	6315000		0.982853	0.410308	4.179	0	49.0144	5
FALSE	High	Master Protein	P0A7J7	50S ribosomal protein L11 OS=Escherichia coli (strain K12) GN=rplK PE=1 SV=2	0	29.8863	33.0986	5	21	5	1	142	14.866	9.63		948484	rplK; SH08_01435; SH03_01430; SH06_01430; SH04_01430; SH07_01435; SF31_01430			cell communication;cell organization and biogenesis;metabolic process;response to stimulus	cytosol;ribosome	protein binding;RNA binding;structural molecule activity	Pf00298, Pf03946	1.754	1.725	1.734	6426000	6283000	6158000	11270000	10840000	10680000		1.73796	0.00028131	11.915	0	65.3537	5
FALSE	High	Master Protein	O15212	Prefoldin subunit 6 OS=Homo sapiens GN=PFDN6 PE=1 SV=1	0	44.8973	50.3876	7	24	7	1	129	14.574	8.88		10471	PFDN6	ENSG00000204220.11; ENSG00000237335.8; ENSG00000224782.8; ENSG00000235692.8; ENSG00000206283.10	6; CHR_HSCHR6_MHC_COX_CTG1; CHR_HSCHR6_MHC_DBB_CTG1; CHR_HSCHR6_MHC_MCF_CTG1; CHR_HSCHR6_MHC_QBL_CTG1	cell organization and biogenesis;metabolic process	cytoplasm	catalytic activity;protein binding	Pf01920, Pf15499	0.971	0.966	0.97	6418000	6440000	6462000	6232000	6219000	6269000		0.968944	0.000598074	41.17	0	81.9607	7
FALSE	High	Master Protein	P13489	Ribonuclease inhibitor OS=Homo sapiens GN=RNH1 PE=1 SV=2	0	158.839	54.4469	20	71	19	1	461	49.941	4.82		6050	RNH1	ENSG00000276230.4; ENSG00000023191.16	11; CHR_HSCHR11_1_CTG8	metabolic process;regulation of biological process	cytoplasm;cytosol	enzyme regulator activity;protein binding		0.977	1.012	0.98	6414000	6340000	6443000	6263000	6418000	6315000		0.98953	0.298068	24.551	1	239.599	20
FALSE	High	Master Protein	Q9H910	Hematological and neurological expressed 1-like protein OS=Homo sapiens GN=HN1L PE=1 SV=1	0	102.481	70.5263	10	56	2	1	190	20.051	9.26		90861	HN1L; JPT2	ENSG00000206053.12	16		cytoplasm;cytosol;membrane;nucleus			0.983	0.977	1.006	6412000	6445000	6479000	6302000	6297000	6516000		0.988571	0.416819	214.443	9	177.735	10
FALSE	High	Master Protein	Q9H3H5	UDP-N-acetylglucosamine--dolichyl-phosphate N-acetylglucosaminephosphotransferase OS=Homo sapiens GN=DPAGT1 PE=1 SV=2	0.00045529	8.64481	5.63725	3	5	3	1	408	46.059	8		1798	DPAGT1	ENSG00000172269.18	11	cell organization and biogenesis;metabolic process	endoplasmic reticulum;membrane	catalytic activity	Pf00953	0.978	1.114	0.964	6382000	5836000	5870000	6240000	6498000	5659000		1.01708	0.753933	1.031	0	14.3589	3
FALSE	High	Master Protein	Q9Y678	Coatomer subunit gamma-1 OS=Homo sapiens GN=COPG1 PE=1 SV=1	0	243.32	45.6522	32	85	29	1	874	97.655	5.47		22820	COPG1	ENSG00000181789.14	3	cellular component movement;transport	cytoplasm;cytosol;Golgi;membrane	protein binding;structural molecule activity	Pf01602, Pf08752	0.956	0.976	0.989	6373000	6183000	6280000	6095000	6037000	6209000		0.973721	0.0918188	13.35	3	287.076	32
FALSE	High	Master Protein	Q9H0U4	Ras-related protein Rab-1B OS=Homo sapiens GN=RAB1B PE=1 SV=1	0	85.3918	55.2239	11	79	3	1	201	22.157	5.73		81876	RAB1B	ENSG00000174903.15	11	cell organization and biogenesis;metabolic process;regulation of biological process;response to stimulus;transport	cytoplasm;cytosol;Golgi;membrane;mitochondrion	catalytic activity;nucleotide binding;protein binding	Pf00025, Pf00071, Pf01926, Pf04670, Pf08477, Pf09439	0.995	1.01	1.014	6372000	6444000	6406000	6342000	6512000	6494000		1.00655	0.527614	50.795	0	223.577	11
FALSE	High	Master Protein	P05026	Sodium/potassium-transporting ATPase subunit beta-1 OS=Homo sapiens GN=ATP1B1 PE=1 SV=1	0	49.1871	28.3828	8	19	8	1	303	35.039	8.53		481	ATP1B1	ENSG00000143153.12	1	cell communication;cell organization and biogenesis;cellular component movement;cellular homeostasis;metabolic process;regulation of biological process;response to stimulus;transport	membrane	catalytic activity;enzyme regulator activity;metal ion binding;nucleotide binding;protein binding;transporter activity	Pf00287	0.996	1.019	0.963	6369000	6104000	6520000	6343000	6218000	6281000		0.99205	0.724666	7.66	0	52.2836	8
FALSE	High	Master Protein	Q01130	Serine/arginine-rich splicing factor 2 OS=Homo sapiens GN=SRSF2 PE=1 SV=4	0	45.2527	23.9819	6	32	5	1	221	25.461	11.85		6427	SRSF2	ENSG00000161547.16	17	metabolic process;regulation of biological process;response to stimulus;transport	cytosol;nucleus;spliceosomal complex	nucleotide binding;protein binding;RNA binding	Pf00076, Pf13893, Pf14259	1.009	0.919	0.986	6357000	6449000	6219000	6415000	5929000	6133000		0.971196	0.329828	20.544	1	93.8849	6
FALSE	High	Master Protein	P0A6P9	Enolase OS=Escherichia coli (strain K12) GN=eno PE=1 SV=2	0	229.354	55.5556	23	110	23	1	432	45.626	5.48		945032	eno; SH08_18150; SH03_18050; SH06_18355; SH04_18040; SH07_18045; SF31_18380			metabolic process	cell surface;cytoplasm;cytoskeleton;cytosol;extracellular;membrane	catalytic activity;metal ion binding;protein binding	Pf00113, Pf03952	1.656	1.677	1.739	6354000	6215000	6161000	10520000	10420000	10720000		1.69034	9.52125e-06	890.251	0	341.105	23
FALSE	High	Master Protein	Q9H583	HEAT repeat-containing protein 1 OS=Homo sapiens GN=HEATR1 PE=1 SV=3	0	285.83	26.166	53	113	53	1	2144	242.215	6.54		55127	HEATR1	ENSG00000119285.10	1	metabolic process;regulation of biological process	membrane;mitochondrion;nucleus	protein binding;RNA binding	Pf08146, Pf12397	0.949	0.973	0.962	6352000	6264000	6213000	6030000	6095000	5977000		0.961389	0.0109884	4.051	0	330.893	53
FALSE	High	Master Protein	P31040	Succinate dehydrogenase [ubiquinone] flavoprotein subunit, mitochondrial OS=Homo sapiens GN=SDHA PE=1 SV=2	0	183.929	40.8133	22	78	22	1	664	72.645	7.39		6389	SDHA	ENSG00000073578.16	5	metabolic process;transport	membrane;mitochondrion	catalytic activity;nucleotide binding;protein binding	Pf00890, Pf02910	1.001	0.99	0.966	6345000	6366000	6521000	6353000	6300000	6299000		0.985441	0.229247	22.101	0	236.157	22
FALSE	High	Master Protein	O60925	Prefoldin subunit 1 OS=Homo sapiens GN=PFDN1 PE=1 SV=2	0	23.7085	30.3279	5	13	5	1	122	14.202	6.81		5201	PFDN1	ENSG00000113068.9	5	metabolic process;regulation of biological process		protein binding	Pf01920	1.044	0.967	0.924	6322000	6784000	6624000	6599000	6561000	6120000		0.977192	0.505289	9	0	39.3339	5
FALSE	High	Master Protein	Q9UQ35	Serine/arginine repetitive matrix protein 2 OS=Homo sapiens GN=SRRM2 PE=1 SV=2	0	396.344	27.9433	58	152	58	1	2752	299.438	12.06		23524	SRRM2	ENSG00000167978.16	16	metabolic process	nucleus;spliceosomal complex	protein binding;RNA binding		1.002	0.982	1.004	6313000	6374000	6404000	6324000	6260000	6431000		0.996019	0.684269	5.602	0	488.41	58
FALSE	High	Master Protein	P52788	Spermine synthase OS=Homo sapiens GN=SMS PE=1 SV=2	0	47.1897	30.8743	13	19	13	1	366	41.242	5.02		6611	SMS	ENSG00000102172.15	X	metabolic process	cytosol	catalytic activity	Pf01564	0.949	0.996	0.974	6304000	6342000	6300000	5983000	6318000	6137000		0.973187	0.220675	4.623	0	50.6312	13
FALSE	High	Master Protein	Q9NUJ1	Mycophenolic acid acyl-glucuronide esterase, mitochondrial OS=Homo sapiens GN=ABHD10 PE=1 SV=1	0	73.9316	43.4641	10	24	10	1	306	33.911	8.57		55347	ABHD10	ENSG00000144827.8	3	metabolic process	cytosol;mitochondrion;organelle lumen	catalytic activity	Pf00326, Pf00561, Pf12695, Pf12697	0.948	1.052	0.974	6294000	5889000	6014000	5970000	6196000	5858000		0.990493	0.730355	10.45	0	86.3833	10
FALSE	High	Master Protein	O00303	Eukaryotic translation initiation factor 3 subunit F OS=Homo sapiens GN=EIF3F PE=1 SV=1	0	99.9003	35.8543	11	63	11	1	357	37.54	5.45		8665	EIF3F	ENSG00000280606.3; ENSG00000175390.13	11; CHR_HSCHR11_1_CTG1_2	metabolic process	cytoplasm;cytosol;membrane	catalytic activity;protein binding;RNA binding	Pf01398, Pf13012	0.996	0.979	1.003	6292000	6389000	6484000	6265000	6253000	6506000		0.992643	0.663996	47.697	0	185.301	11
FALSE	High	Master Protein	P40222	Alpha-taxilin OS=Homo sapiens GN=TXLNA PE=1 SV=3	0	190.011	51.8315	27	82	27	1	546	61.853	6.52		200081	TXLNA	ENSG00000084652.15	1	cell proliferation;transport	cytoplasm;extracellular;membrane	protein binding	Pf09728	1.031	0.964	1.011	6287000	6324000	6336000	6481000	6099000	6409000		1.00222	0.916185	129.432	0	235.688	27
FALSE	High	Master Protein	Q9Y5J7	Mitochondrial import inner membrane translocase subunit Tim9 OS=Homo sapiens GN=TIMM9 PE=1 SV=1	0	35.3367	65.1685	5	13	5	1	89	10.371	7.21		26520	TIMM9	ENSG00000100575.13	14	cell organization and biogenesis;transport	membrane;mitochondrion	metal ion binding;protein binding;transporter activity	Pf02953	0.977	0.933	0.953	6277000	6389000	6169000	6130000	5960000	5881000		0.954128	0.0424054	30.623	0	49.2188	5
FALSE	High	Master Protein	Q13247	Serine/arginine-rich splicing factor 6 OS=Homo sapiens GN=SRSF6 PE=1 SV=2	0	77.0729	33.1395	15	46	9	1	344	39.563	11.43		6431	SRSF6	ENSG00000124193.14	20	cell organization and biogenesis;metabolic process;regulation of biological process;response to stimulus;transport	nucleus	nucleotide binding;protein binding;RNA binding	Pf00076, Pf08777, Pf13893, Pf14259	1.005	0.999	1.002	6275000	6163000	6159000	6307000	6156000	6173000		1.0021	0.842252	30.623	0	135.779	15
FALSE	High	Master Protein	P31949	Protein S100-A11 OS=Homo sapiens GN=S100A11 PE=1 SV=2	0	19.9035	37.1429	5	10	5	1	105	11.733	7.12		6282	S100A11	ENSG00000163191.5	1	regulation of biological process;response to stimulus;transport	cytoplasm;extracellular;nucleus;organelle lumen	metal ion binding;protein binding	Pf00036, Pf01023, Pf13499, Pf13833	0.923	0.906	0.942	6272000	6142000	5962000	5787000	5568000	5616000		0.923542	0.0163895	13.678	0	27.558	5
FALSE	High	Master Protein	Q99460	26S proteasome non-ATPase regulatory subunit 1 OS=Homo sapiens GN=PSMD1 PE=1 SV=2	0	288.414	50.9969	40	104	40	1	953	105.769	5.39		5707	PSMD1	ENSG00000173692.12	2	metabolic process;regulation of biological process;response to stimulus;transport	cytosol;extracellular;membrane;nucleus;organelle lumen;proteasome	catalytic activity;enzyme regulator activity	Pf01851, Pf13513, Pf13646	1.017	1.018	0.961	6259000	6397000	6449000	6366000	6511000	6198000		0.99843	0.930667	27.84	0	344.971	40
FALSE	High	Master Protein	P26640	Valine--tRNA ligase OS=Homo sapiens GN=VARS PE=1 SV=4	0	270.446	37.6582	45	121	45	1	1264	140.387	7.59		7407	VARS	ENSG00000096171.14; ENSG00000204394.12; ENSG00000226589.9	6; CHR_HSCHR6_MHC_DBB_CTG1; CHR_HSCHR6_MHC_COX_CTG1	metabolic process;regulation of biological process	cytoplasm;cytosol;mitochondrion	catalytic activity;nucleotide binding;protein binding	Pf00043, Pf00133, Pf08264, Pf09334, Pf13603	0.993	0.975	1.012	6257000	6338000	6216000	6211000	6179000	6294000		0.993249	0.441483	17.802	0	388.457	45
FALSE	High	Master Protein	P40337	Von Hippel-Lindau disease tumor suppressor OS=Homo sapiens GN=VHL PE=1 SV=2	0.000527218	8.06037	10.7981	2	3	2	1	213	24.138	4.73		7428	VHL	ENSG00000134086.7	3	cell organization and biogenesis;metabolic process;regulation of biological process;response to stimulus	cytoplasm;cytosol;endoplasmic reticulum;membrane;mitochondrion;nucleus	catalytic activity;protein binding	Pf01847	1.013	0.961	1.056	6252000	6504000	6069000	6333000	6253000	6407000		1.00892	0.708788	2.162	0	8.05596	2
FALSE	High	Master Protein	P61158	Actin-related protein 3 OS=Homo sapiens GN=ACTR3 PE=1 SV=3	0	118.537	44.7368	17	64	14	1	418	47.341	5.88		10096	ACTR3	ENSG00000115091.11	2	cell division;cell organization and biogenesis;cellular component movement;regulation of biological process;response to stimulus	cytoplasm;cytoskeleton;cytosol;membrane	nucleotide binding;protein binding;structural molecule activity	Pf00022	0.953	0.932	0.982	6250000	6468000	6297000	5958000	6027000	6182000		0.955404	0.0392534	21.275	3	209.703	17
FALSE	High	Master Protein	Q13347	Eukaryotic translation initiation factor 3 subunit I OS=Homo sapiens GN=EIF3I PE=1 SV=1	0	148.964	59.3846	14	68	8	1	325	36.479	5.64		8668	EIF3I	ENSG00000084623.11	1	cell organization and biogenesis;metabolic process;regulation of biological process	cytoplasm;cytosol	protein binding;RNA binding	Pf00400	1.008	0.986	1.035	6243000	6282000	6234000	6295000	6192000	6450000		1.00949	0.513631	62.096	9	221.165	14
FALSE	High	Master Protein	Q86Y82	Syntaxin-12 OS=Homo sapiens GN=STX12 PE=1 SV=1	0	76.6696	40.942	9	28	9	1	276	31.622	5.59		23673	STX12	ENSG00000117758.13	1	cell organization and biogenesis;regulation of biological process;transport	endosome;Golgi;membrane	protein binding	Pf00804, Pf05739, Pf14523	0.975	0.972	0.963	6231000	6165000	6165000	6074000	5990000	5938000		0.969883	0.0240609	21.758	0	90.3093	9
FALSE	High	Master Protein	P63010	AP-2 complex subunit beta OS=Homo sapiens GN=AP2B1 PE=1 SV=1	0	202.154	31.4835	31	89	13	1	937	104.486	5.38		163	AP2B1	ENSG00000006125.17	17	cell organization and biogenesis;cellular component movement;metabolic process;regulation of biological process;response to stimulus;transport	cytosol;membrane	protein binding;transporter activity	Pf01602, Pf02883, Pf09066, Pf12717, Pf13646	0.982	0.954	1.012	6229000	6261000	5997000	6119000	5975000	6067000		0.982366	0.329009	17.233	0	284.741	31
FALSE	High	Master Protein	P53990	IST1 homolog OS=Homo sapiens GN=IST1 PE=1 SV=1	0	48.5382	23.0769	10	22	10	1	364	39.725	5.35		9798	IST1		16	cell division;cell organization and biogenesis;regulation of biological process;transport	chromosome;cytoplasm;cytoskeleton;cytosol;extracellular;nucleus;organelle lumen	protein binding	Pf03398	1.013	0.924	0.976	6226000	6673000	6482000	6308000	6169000	6329000		0.970332	0.274691	10.659	0	62.7371	10
FALSE	High	Master Protein	H7BZJ3	Protein disulfide-isomerase A3 (Fragment) OS=Homo sapiens GN=PDIA3 PE=1 SV=1	0	57.6863	51.2195	7	38	1	1	123	13.511	7.3				ENSG00000167004.12	15	cellular homeostasis;regulation of biological process		catalytic activity	Pf00085, Pf13098, Pf13192, Pf13905	0.956	1.023	1.035	6224000	6209000	5843000	5953000	6350000	6049000		1.00416	0.890475	45.416	0	125.621	7
FALSE	High	Master Protein	P0A6P1	Elongation factor Ts OS=Escherichia coli (strain K12) GN=tsf PE=1 SV=2	0	94.0273	55.1237	17	36	17	1	283	30.404	5.29		944866	tsf; SH08_04600; SH03_04590; SH06_04900; SH04_04580; SH07_04585; SF31_04900			metabolic process;regulation of biological process;response to stimulus	cytoplasm;cytosol;membrane	catalytic activity;metal ion binding;nucleotide binding;protein binding;RNA binding	Pf00627, Pf00889, Pf10144	1.741	1.644	1.79	6215000	6425000	6046000	10820000	10560000	10820000		1.72322	8.98467e-06	16.783	0	117.172	17
FALSE	High	Master Protein	P35606	Coatomer subunit beta' OS=Homo sapiens GN=COPB2 PE=1 SV=2	0	280.634	46.0265	36	113	36	1	906	102.422	5.27		9276	COPB2	ENSG00000184432.9	3	transport	cytoplasm;cytosol;Golgi;membrane	protein binding;structural molecule activity	Pf00400, Pf04053	0.983	0.985	0.96	6214000	6320000	6283000	6106000	6224000	6035000		0.975979	0.0932704	26.001	0	354.282	36
FALSE	High	Master Protein	P28838	Cytosol aminopeptidase OS=Homo sapiens GN=LAP3 PE=1 SV=3	0	184.717	62.6204	27	72	27	1	519	56.131	7.93		51056	LAP3	ENSG00000002549.12	4	metabolic process	cytoplasm;cytosol;mitochondrion;nucleus	catalytic activity;metal ion binding	Pf00883, Pf02789	0.991	0.996	0.99	6210000	6236000	6281000	6153000	6213000	6217000		0.992311	0.17673	17.395	0	260.906	27
FALSE	High	Master Protein	Q08J23	tRNA (cytosine(34)-C(5))-methyltransferase OS=Homo sapiens GN=NSUN2 PE=1 SV=2	0	300.079	65.4498	43	133	43	1	767	86.416	6.77		54888	NSUN2	ENSG00000037474.14	5	cell division;cell organization and biogenesis;metabolic process	cytoplasm;cytoskeleton;nucleus	catalytic activity;RNA binding	Pf01189, Pf13659	0.973	0.998	0.969	6200000	6201000	6396000	6032000	6189000	6195000		0.979731	0.208785	55.234	0	414.593	43
FALSE	High	Master Protein	P35613	Basigin OS=Homo sapiens GN=BSG PE=1 SV=2	0	83.3133	30.3896	10	35	10	1	385	42.174	5.66		682	BSG	ENSG00000172270.18	19	cell organization and biogenesis;cellular component movement;metabolic process;regulation of biological process;response to stimulus;transport	membrane;mitochondrion	protein binding;transporter activity	Pf00047, Pf07679, Pf13895, Pf13927	1.077	0.965	1.027	6195000	6663000	6556000	6671000	6428000	6736000		1.02169	0.461529	7.859	0	114.203	10
FALSE	High	Master Protein	O43684	Mitotic checkpoint protein BUB3 OS=Homo sapiens GN=BUB3 PE=1 SV=1	0	110.63	52.439	14	46	14	1	328	37.131	6.84		9184	BUB3	ENSG00000154473.17	10	cell division;cell organization and biogenesis;metabolic process;regulation of biological process	chromosome;cytosol;nucleus	protein binding	Pf00400, Pf04762	0.971	0.969	0.982	6180000	6300000	6059000	6001000	6106000	5950000		0.974001	0.137113	28.552	0	165.002	14
FALSE	High	Master Protein	O75964	ATP synthase subunit g, mitochondrial OS=Homo sapiens GN=ATP5L PE=1 SV=3	0	52.1095	47.5728	5	20	5	1	103	11.421	9.64		10632	ATP5L	ENSG00000167283.7	11	cell organization and biogenesis;metabolic process;transport	membrane;mitochondrion	catalytic activity;transporter activity	Pf04718	1.011	0.995	0.984	6173000	6321000	6262000	6238000	6290000	6164000		0.996588	0.725173	67.129	0	78.3125	5
FALSE	High	Master Protein	P62888	60S ribosomal protein L30 OS=Homo sapiens GN=RPL30 PE=1 SV=2	0	102.833	74.7826	9	62	9	1	115	12.776	9.63		6156	RPL30	ENSG00000156482.10	8	cell organization and biogenesis;defense response;metabolic process;response to stimulus;transport	cytosol;membrane;nucleus;ribosome	protein binding;RNA binding;structural molecule activity	Pf01248	1.006	1.003	0.978	6159000	6460000	6543000	6198000	6477000	6400000		0.99546	0.850471	14677	0	201.077	9
FALSE	High	Master Protein	P15927	Replication protein A 32 kDa subunit OS=Homo sapiens GN=RPA2 PE=1 SV=1	0	58.612	35.1852	7	25	7	1	270	29.228	6.15		6118	RPA2	ENSG00000117748.9	1	cell organization and biogenesis;metabolic process;regulation of biological process;response to stimulus	chromosome;nucleus	DNA binding;protein binding	Pf08784	1.054	1.013	1.034	6154000	6368000	6352000	6483000	6451000	6569000		1.03333	0.073563	20.544	0	84.8109	7
FALSE	High	Master Protein	O15144	Actin-related protein 2/3 complex subunit 2 OS=Homo sapiens GN=ARPC2 PE=1 SV=1	0	71.5477	37.6667	12	35	12	1	300	34.311	7.36		10109	ARPC2	ENSG00000163466.15	2	cell organization and biogenesis;cellular component movement;regulation of biological process;response to stimulus	cytoplasm;cytoskeleton;cytosol;endosome;membrane	protein binding;structural molecule activity	Pf04045	1.012	0.995	1.026	6148000	6329000	6307000	6224000	6297000	6470000		1.01102	0.499785	13.125	0	98.3771	12
FALSE	High	Master Protein	P09661	U2 small nuclear ribonucleoprotein A' OS=Homo sapiens GN=SNRPA1 PE=1 SV=2	0	75.2572	39.6078	12	41	12	1	255	28.398	8.62		6627	SNRPA1	ENSG00000131876.16	15	metabolic process	nucleus;spliceosomal complex	protein binding;RNA binding	Pf12799, Pf13855, Pf14580	0.981	0.994	0.998	6146000	6209000	6046000	6031000	6170000	6036000		0.991087	0.452624	80.113	0	124.285	12
FALSE	High	Master Protein	Q9Y2L1	Exosome complex exonuclease RRP44 OS=Homo sapiens GN=DIS3 PE=1 SV=2	0	248.238	44.3633	38	95	38	1	958	108.934	7.14		22894	DIS3	ENSG00000083520.14	13	metabolic process;regulation of biological process	cytoplasm;cytosol;membrane;nucleus	catalytic activity;protein binding;RNA binding	Pf00773, Pf09742, Pf13638	1.018	0.995	1.023	6145000	6319000	6162000	6254000	6286000	6305000		1.01176	0.317071	20.21	0	307.075	38
FALSE	High	Master Protein	Q9NZ01	Very-long-chain enoyl-CoA reductase OS=Homo sapiens GN=TECR PE=1 SV=1	0	33.6195	19.8052	8	18	8	1	308	36.011	9.45		9524	TECR	ENSG00000099797.13	19	metabolic process	cytoplasm;endoplasmic reticulum;membrane;nucleus	catalytic activity;protein binding	Pf02544	0.987	1.035	1.017	6143000	6122000	6152000	6063000	6336000	6254000		1.01281	0.433546	5.494	0	50.8344	8
FALSE	High	Master Protein	P61009	Signal peptidase complex subunit 3 OS=Homo sapiens GN=SPCS3 PE=1 SV=1	0	34.2092	17.7778	3	21	3	1	180	20.301	8.62		60559	SPCS3	ENSG00000129128.12	4	metabolic process;transport	endoplasmic reticulum;membrane	catalytic activity	Pf04573	0.974	0.876	1.049	6136000	6364000	6002000	5979000	5575000	6293000		0.964598	0.418738	9	0	67.0455	3
FALSE	High	Master Protein	P11387	DNA topoisomerase 1 OS=Homo sapiens GN=TOP1 PE=1 SV=2	0	174.493	39.085	31	90	28	1	765	90.669	9.31		7150	TOP1	ENSG00000198900.5	20	cell death;cell division;cell organization and biogenesis;metabolic process;regulation of biological process;response to stimulus	chromosome;cytoplasm;nucleus	catalytic activity;DNA binding;nucleotide binding;protein binding;RNA binding	Pf01028, Pf02919, Pf14370	0.989	0.964	0.989	6116000	6187000	6143000	6048000	5965000	6076000		0.980646	0.0488204	24.719	4	274.487	31
FALSE	High	Master Protein	Q9Y277	Voltage-dependent anion-selective channel protein 3 OS=Homo sapiens GN=VDAC3 PE=1 SV=1	0	103.308	41.3428	10	99	9	1	283	30.639	8.66		7419	VDAC3	ENSG00000078668.13	8	cell communication;defense response;regulation of biological process;response to stimulus;transport	membrane;mitochondrion;nucleus	nucleotide binding;transporter activity	Pf01459	0.976	0.994	1.012	6114000	6027000	6210000	5970000	5993000	6282000		0.994224	0.775663	28.286	0	286.955	10
FALSE	High	Master Protein	P07197	Neurofilament medium polypeptide OS=Homo sapiens GN=NEFM PE=1 SV=3	0	179.127	34.3886	33	85	29	1	916	102.411	4.91		4741	NEFM	ENSG00000104722.13	8	cell organization and biogenesis;metabolic process;regulation of biological process		protein binding;structural molecule activity	Pf00038, Pf02463, Pf04111, Pf07888, Pf07902, Pf10186, Pf10498, Pf12128, Pf13166, Pf13863	0.985	1.007	1.009	6104000	6149000	6298000	6015000	6190000	6353000		1.00038	0.984833	11.844	2	264.926	33
FALSE	High	Master Protein	Q9NY12	H/ACA ribonucleoprotein complex subunit 1 OS=Homo sapiens GN=GAR1 PE=1 SV=1	0	34.7901	38.7097	9	17	9	1	217	22.334	10.92		54433	GAR1	ENSG00000109534.16	4	cell organization and biogenesis;metabolic process;transport	nucleus	protein binding;RNA binding;transporter activity	Pf04410	0.939	1.016	1.038	6098000	5859000	5879000	5729000	5951000	6100000		0.99686	0.895242	9	0	46.0024	9
FALSE	High	Master Protein	P46940	Ras GTPase-activating-like protein IQGAP1 OS=Homo sapiens GN=IQGAP1 PE=1 SV=1	0	390.685	37.0549	59	143	55	1	1657	189.134	6.48		8826	IQGAP1	ENSG00000140575.12	15	cell growth;regulation of biological process;response to stimulus;transport	cytoplasm;cytoskeleton;cytosol;membrane;nucleus	enzyme regulator activity;metal ion binding;protein binding	Pf00307, Pf00397, Pf00616, Pf03836, Pf11016	0.987	0.995	1.008	6095000	6112000	6093000	6014000	6079000	6139000		0.996284	0.595866	15.94	3	483.919	59
FALSE	High	Master Protein	Q96HS1	Serine/threonine-protein phosphatase PGAM5, mitochondrial OS=Homo sapiens GN=PGAM5 PE=1 SV=2	0	103.274	58.4775	16	83	16	1	289	31.985	8.68		192111	PGAM5	ENSG00000247077.6	12	cell communication;cell death;metabolic process;regulation of biological process;response to stimulus	membrane;mitochondrion	catalytic activity;enzyme regulator activity;protein binding;signal transducer activity	Pf00300	1.004	1.005	1.022	6091000	6260000	6138000	6116000	6294000	6273000		1.01049	0.440163	49.802	0	221.347	16
FALSE	High	Master Protein	P33993	DNA replication licensing factor MCM7 OS=Homo sapiens GN=MCM7 PE=1 SV=4	0	218.908	49.6523	37	94	37	1	719	81.257	6.46		4176	MCM7	ENSG00000166508.17	7	cell proliferation;metabolic process;regulation of biological process;response to stimulus	chromosome;cytosol;membrane;nucleus	catalytic activity;DNA binding;nucleotide binding;protein binding	Pf00493, Pf07728, Pf14551	0.988	1.002	0.99	6088000	6004000	6056000	6017000	6016000	5997000		0.993498	0.245452	25.607	0	281.413	37
FALSE	High	Master Protein	P43490	Nicotinamide phosphoribosyltransferase OS=Homo sapiens GN=NAMPT PE=1 SV=1	0	144.898	46.8432	21	64	21	1	491	55.487	7.15		10135	NAMPT	ENSG00000105835.11	7	cell communication;metabolic process;regulation of biological process;response to stimulus	cytoplasm;cytosol;extracellular;nucleus	catalytic activity;protein binding	Pf04095	0.957	1.001	0.987	6081000	5913000	5934000	5818000	5920000	5858000		0.981481	0.161031	19.434	0	195.018	21
FALSE	High	Master Protein	P36871	Phosphoglucomutase-1 OS=Homo sapiens GN=PGM1 PE=1 SV=3	0	207.11	57.6512	27	88	27	1	562	61.411	6.76		5236	PGM1	ENSG00000079739.15	1	metabolic process;transport	cytoplasm;cytoskeleton;cytosol;extracellular	catalytic activity;metal ion binding;protein binding	Pf00408, Pf02878, Pf02879, Pf02880	0.985	0.983	0.999	6079000	6261000	6120000	5988000	6156000	6116000		0.989166	0.423871	26.617	0	282.289	27
FALSE	High	Master Protein	O75323	Protein NipSnap homolog 2 OS=Homo sapiens GN=GBAS PE=1 SV=1	0	43.5951	19.2308	6	18	5	1	286	33.721	9.36		2631	GBAS; NIPSNAP2	ENSG00000146729.9	7	metabolic process;regulation of biological process	cytoplasm;membrane;mitochondrion	protein binding	Pf07978	1.035	1	0.94	6051000	6142000	6322000	6263000	6143000	5943000		0.991034	0.67589	4.412	0	68.3255	6
FALSE	High	Master Protein	P84101	Small EDRK-rich factor 2 OS=Homo sapiens GN=SERF2 PE=1 SV=1	5.18027e-05	11.8193	30.5085	3	4	3	1	59	6.896	10.45		10169	SERF2	ENSG00000140264.19	15		cytosol;nucleus			0.921	0.958	0.976	6036000	6019000	5721000	5562000	5765000	5581000		0.95117	0.0869884	99	0	11.4499	3
FALSE	High	Master Protein	Q7Z6Z7	E3 ubiquitin-protein ligase HUWE1 OS=Homo sapiens GN=HUWE1 PE=1 SV=3	0	696.459	29.9726	108	245	108	1	4374	481.589	5.22		10075	HUWE1	ENSG00000086758.15	X	cell differentiation;cell organization and biogenesis;metabolic process;response to stimulus;transport	cytoplasm;cytosol;extracellular;membrane;nucleus;organelle lumen	catalytic activity;DNA binding;protein binding;RNA binding	Pf00632, Pf02825, Pf06012, Pf06025, Pf14377	0.977	0.98	1.003	6035000	6157000	6111000	5895000	6032000	6130000		0.98656	0.364001	7.333	0	781.278	108
FALSE	High	Master Protein	Q8N1F7	Nuclear pore complex protein Nup93 OS=Homo sapiens GN=NUP93 PE=1 SV=2	0	235.141	54.823	40	102	40	1	819	93.43	5.72		9688	NUP93	ENSG00000102900.12	16	cell organization and biogenesis;cellular component movement;metabolic process;regulation of biological process;response to stimulus;transport	membrane;nucleus	protein binding;structural molecule activity	Pf04097	0.952	1.002	0.978	6035000	5943000	5984000	5745000	5954000	5852000		0.977118	0.137553	16.783	0	300.937	40
FALSE	High	Master Protein	O14964	Hepatocyte growth factor-regulated tyrosine kinase substrate OS=Homo sapiens GN=HGS PE=1 SV=1	0	69.7199	22.2651	17	33	17	1	777	86.138	6.16		9146	HGS	ENSG00000185359.12	17	cell communication;cell organization and biogenesis;metabolic process;regulation of biological process;response to stimulus;transport	cytoplasm;cytosol;endosome;membrane;vacuole	catalytic activity;metal ion binding;protein binding	Pf00790, Pf01363, Pf09770, Pf12210, Pf13388	1.017	0.994	1	6034000	6065000	6045000	6134000	6026000	6048000		1.00353	0.588775	7.432	0	99.1629	17
FALSE	High	Master Protein	P07954	Fumarate hydratase, mitochondrial OS=Homo sapiens GN=FH PE=1 SV=3	0	155.916	37.6471	16	68	16	1	510	54.602	8.76		2271	FH	ENSG00000091483.6	1	metabolic process	cytoplasm;mitochondrion;organelle lumen	catalytic activity;protein binding	Pf00206, Pf10415	0.985	0.966	0.986	6028000	5915000	5987000	5940000	5716000	5902000		0.979253	0.208502	30.623	0	217.493	16
FALSE	High	Master Protein	P64581	Uncharacterized protein YqjD OS=Escherichia coli (strain K12) GN=yqjD PE=1 SV=1	0	23.8911	41.5842	4	12	4	1	101	11.045	9.09		947614	yqjD; SH08_19785; SH03_19685; SH06_19990; SH04_19675; SH07_19680; SF31_20030				membrane	protein binding	Pf05957	1.756	1.72	1.646	6026000	5870000	5780000	10580000	10100000	9516000		1.70831	0.00375469	55.234	0	39.9885	4
FALSE	High	Master Protein	Q9UHI6	Probable ATP-dependent RNA helicase DDX20 OS=Homo sapiens GN=DDX20 PE=1 SV=2	0	154.748	34.8301	23	55	23	1	824	92.183	6.95		11218	DDX20	ENSG00000064703.11	1	cell organization and biogenesis;metabolic process;regulation of biological process;transport	cytoplasm;cytoskeleton;cytosol;membrane;nucleus	catalytic activity;DNA binding;nucleotide binding;protein binding	Pf00270, Pf00271	0.982	1.007	1.004	6024000	5927000	5836000	5914000	5968000	5861000		0.997526	0.828681	7.516	0	183.568	23
FALSE	High	Master Protein	Q9Y3I0	tRNA-splicing ligase RtcB homolog OS=Homo sapiens GN=RTCB PE=1 SV=1	0	186.057	46.7327	24	92	24	1	505	55.175	7.23		51493	C22orf28; RTCB	ENSG00000100220.11	22	metabolic process	cytoplasm;cytosol;membrane;nucleus	catalytic activity;metal ion binding;nucleotide binding;protein binding;RNA binding	Pf01139	1.024	1.006	1.02	6021000	6096000	5997000	6164000	6135000	6116000		1.01662	0.0597216	76.426	0	291.857	24
FALSE	High	Master Protein	P35659	Protein DEK OS=Homo sapiens GN=DEK PE=1 SV=1	0	77.9189	30.4	13	49	13	1	375	42.648	8.56		7913	DEK	ENSG00000124795.14	6	cell organization and biogenesis;metabolic process;regulation of biological process;response to stimulus	nucleus	DNA binding;protein binding;RNA binding	Pf02037, Pf08766	0.928	0.994	0.975	6006000	5940000	6052000	5574000	5903000	5898000		0.965385	0.189644	10.159	0	151.635	13
FALSE	High	Master Protein	P42167	Lamina-associated polypeptide 2, isoforms beta/gamma OS=Homo sapiens GN=TMPO PE=1 SV=2	0	145.566	48.0176	17	64	5	1	454	50.639	9.38		7112	TMPO	ENSG00000120802.13	12	regulation of biological process	chromosome;cytoplasm;membrane;nucleus	DNA binding;protein binding	Pf03020, Pf08198	0.966	1.02	0.989	5997000	5829000	5921000	5796000	5945000	5855000		0.991492	0.482995	23.621	5	231.323	17
FALSE	High	Master Protein	Q13283	Ras GTPase-activating protein-binding protein 1 OS=Homo sapiens GN=G3BP1 PE=1 SV=1	0	214.78	52.7897	17	119	17	1	466	52.132	5.52		10146	G3BP1	ENSG00000145907.14	5	metabolic process;regulation of biological process;response to stimulus;transport	cytoplasm;cytosol;membrane;nucleus	catalytic activity;DNA binding;nucleotide binding;protein binding;RNA binding	Pf00076, Pf02136, Pf13893, Pf14259	1.011	0.963	1.015	5984000	6251000	6038000	6048000	6023000	6130000		0.99606	0.804467	198.526	0	398.572	17
FALSE	High	Master Protein	A6NEM2	Host cell factor 1 OS=Homo sapiens GN=HCFC1 PE=1 SV=2	0	298.112	26.6346	44	132	2	1	2080	213.343	7.33		3054	HCFC1	ENSG00000172534.13	X	cell organization and biogenesis;metabolic process;regulation of biological process;response to stimulus	cytoplasm;membrane;nucleus	catalytic activity;protein binding	Pf01344, Pf13415, Pf13418, Pf13854, Pf13964	1.017	0.946	1.018	5984000	6204000	5977000	6089000	5871000	6083000		0.993284	0.714216	10.365	37	418.749	44
FALSE	High	Master Protein	Q9BWD1	Acetyl-CoA acetyltransferase, cytosolic OS=Homo sapiens GN=ACAT2 PE=1 SV=2	0	117.57	47.1033	12	37	12	1	397	41.324	6.92		39	ACAT2	ENSG00000120437.8	6	metabolic process	cytoplasm;cytosol;mitochondrion;nucleus	catalytic activity;protein binding	Pf00108, Pf00109, Pf02803	0.939	0.965	1.042	5969000	5690000	5620000	5607000	5492000	5859000		0.981423	0.520338	20.544	0	136.93	12
FALSE	High	Master Protein	O60832	H/ACA ribonucleoprotein complex subunit 4 OS=Homo sapiens GN=DKC1 PE=1 SV=3	0	98.9896	35.6031	19	39	19	1	514	57.638	9.42		1736	DKC1	ENSG00000130826.17	X	cell organization and biogenesis;cell proliferation;metabolic process;regulation of biological process	cytoplasm;nucleus	catalytic activity;protein binding;RNA binding	Pf01472, Pf01509, Pf08068	0.973	0.996	0.991	5968000	5872000	5915000	5810000	5850000	5862000		0.986877	0.0885602	6.88	0	130.414	19
FALSE	High	Master Protein	Q6GMV3	Putative peptidyl-tRNA hydrolase PTRHD1 OS=Homo sapiens GN=PTRHD1 PE=1 SV=1	0	38.0479	52.8571	6	18	6	1	140	15.795	9.1		391356	PTRHD1	ENSG00000184924.5	2			catalytic activity		0.976	1.012	0.965	5956000	6024000	5976000	5813000	6098000	5768000		0.984573	0.467241	16.783	0	60.4507	6
FALSE	High	Master Protein	Q96I24	Far upstream element-binding protein 3 OS=Homo sapiens GN=FUBP3 PE=1 SV=2	0	204.491	60.1399	31	95	26	1	572	61.602	8.38		8939	FUBP3	ENSG00000107164.15	9	metabolic process;regulation of biological process	cytoplasm;membrane;nucleus	DNA binding;protein binding;RNA binding	Pf00013, Pf07650, Pf13014	0.963	1.037	0.99	5937000	5561000	5695000	5718000	5767000	5640000		0.996045	0.860229	52.367	0	253.961	31
FALSE	High	Master Protein	Q9ULX3	RNA-binding protein NOB1 OS=Homo sapiens GN=NOB1 PE=1 SV=1	0	32.0012	22.3301	8	14	8	1	412	46.646	7.18		28987	NOB1	ENSG00000141101.12	16	metabolic process	cytosol;nucleus	catalytic activity;metal ion binding	Pf08772, Pf15017	1.041	0.996	1	5937000	5868000	5977000	6181000	5844000	5975000		1.01226	0.542782	2.325	0	33.0301	8
FALSE	High	Master Protein	D6RBW1	Eukaryotic translation initiation factor 4E OS=Homo sapiens GN=EIF4E PE=1 SV=1	0	43.9132	29.7959	8	26	8	1	245	28.494	8.12		1977	EIF4E	ENSG00000151247.12	4	defense response;metabolic process;regulation of biological process;response to stimulus;transport	cytoplasm;cytosol	protein binding;RNA binding	Pf01652	1.001	1.006	1.009	5934000	5879000	5777000	5939000	5916000	5831000		1.00546	0.604507	11.115	0	79.7705	8
FALSE	High	Master Protein	P10109	Adrenodoxin, mitochondrial OS=Homo sapiens GN=FDX1 PE=1 SV=1	0.00121541	6.14869	9.78261	2	4	2	1	184	19.381	5.83		2230	FDX1	ENSG00000137714.2	11	metabolic process;response to stimulus;transport	mitochondrion;organelle lumen	metal ion binding	Pf00111	0.994	0.913	0.981	5924000	6290000	5641000	5891000	5743000	5533000		0.961467	0.361	0.389	0	13.1963	2
FALSE	High	Master Protein	J3KQ18	D-dopachrome decarboxylase OS=Homo sapiens GN=DDT PE=1 SV=1	0	38.6562	46.9697	7	28	7	1	132	14.184	7.3				ENSG00000099977.13; ENSG00000275003.3	22; CHR_HSCHR22_1_CTG7				Pf01187	0.997	1.017	0.985	5907000	5813000	6159000	5888000	5909000	6068000		0.999217	0.97083	30.623	0	78.4724	7
FALSE	High	Master Protein	O14776	Transcription elongation regulator 1 OS=Homo sapiens GN=TCERG1 PE=1 SV=2	0	160.738	25.4098	36	78	36	1	1098	123.823	8.65		10915	TCERG1	ENSG00000113649.11	5	metabolic process;regulation of biological process	nucleus	protein binding;RNA binding	Pf00397, Pf01846, Pf13949	0.99	0.96	1.001	5902000	6118000	5954000	5840000	5872000	5963000		0.983365	0.270556	20.135	0	221.258	36
FALSE	High	Master Protein	Q6PI48	Aspartate--tRNA ligase, mitochondrial OS=Homo sapiens GN=DARS2 PE=1 SV=1	0	147.887	48.5271	27	65	26	1	645	73.516	8.02		55157	DARS2	ENSG00000117593.9	1	metabolic process	cytoplasm;mitochondrion;nucleus;organelle lumen	catalytic activity;nucleotide binding;protein binding;RNA binding	Pf00152, Pf00587, Pf01336, Pf02938	0.98	1.018	0.95	5898000	5818000	5927000	5778000	5921000	5629000		0.982146	0.341312	10.994	1	214.346	27
FALSE	High	Master Protein	E7EPN9	Protein PRRC2C OS=Homo sapiens GN=PRRC2C PE=1 SV=1	0	396.184	31.8553	76	162	72	1	2819	308.589	9.07		23215	PRRC2C	ENSG00000117523.15	1	cell differentiation	membrane	protein binding;RNA binding	Pf07001	0.994	0.973	0.984	5896000	5900000	5957000	5861000	5743000	5863000		0.98389	0.122597	10.563	3	454.97	76
FALSE	High	Master Protein	P69776	Major outer membrane lipoprotein Lpp OS=Escherichia coli (strain K12) GN=lpp PE=1 SV=1	0	44.5375	57.6923	4	27	4	1	78	8.318	9.25		946175	lpp; SH08_12485; SH03_12385; SH06_12690; SH04_12375; SH07_12380; SF31_12690			metabolic process	membrane	protein binding	Pf04728	1.863	1.908	1.915	5881000	5752000	5742000	10960000	10980000	11000000		1.89583	2.73012e-05	157.489	0	82.6081	4
FALSE	High	Master Protein	O95793	Double-stranded RNA-binding protein Staufen homolog 1 OS=Homo sapiens GN=STAU1 PE=1 SV=2	0	191.991	47.6603	28	68	17	1	577	63.143	9.44		6780	STAU1	ENSG00000124214.19	20	regulation of biological process;response to stimulus	cytoplasm;cytosol;endoplasmic reticulum;membrane	protein binding;RNA binding	Pf00035, Pf14709	1.006	0.97	0.96	5870000	6107000	6176000	5908000	5924000	5931000		0.978516	0.295469	37.075	8	229.689	28
FALSE	High	Master Protein	Q07666	KH domain-containing, RNA-binding, signal transduction-associated protein 1 OS=Homo sapiens GN=KHDRBS1 PE=1 SV=1	0	99.0158	24.1535	11	62	10	1	443	48.197	8.66		10657	KHDRBS1	ENSG00000121774.17	1	cell organization and biogenesis;cell proliferation;metabolic process;regulation of biological process;response to stimulus	cytoplasm;cytosol;membrane;nucleus	DNA binding;protein binding;RNA binding	Pf00013, Pf13014	1.03	1.031	1.062	5866000	6026000	6129000	6040000	6212000	6510000		1.04112	0.210285	116.877	2	175.911	11
FALSE	High	Master Protein	Q9NYV4	Cyclin-dependent kinase 12 OS=Homo sapiens GN=CDK12 PE=1 SV=2	0	140.954	21.3423	25	42	22	1	1490	164.054	9.44		51755	CDK12	ENSG00000167258.13	17	metabolic process;regulation of biological process	chromosome;nucleus	catalytic activity;DNA binding;nucleotide binding;protein binding	Pf00069, Pf07714	0.977	0.979	1.016	5854000	5874000	5574000	5717000	5748000	5664000		0.990001	0.616198	2.278	2	131.025	25
FALSE	High	Master Protein	Q9H4A4	Aminopeptidase B OS=Homo sapiens GN=RNPEP PE=1 SV=2	0	201.908	49.6923	29	83	29	1	650	72.549	5.74		6051	RNPEP	ENSG00000176393.10	1	metabolic process	extracellular;membrane	catalytic activity;metal ion binding	Pf01433, Pf09127, Pf13485	1.017	1.032	1.032	5850000	5957000	5967000	5948000	6149000	6159000		1.02712	0.12971	30.623	0	267.609	29
FALSE	High	Master Protein	P69441	Adenylate kinase OS=Escherichia coli (strain K12) GN=adk PE=1 SV=1	0	73.3668	57.9439	13	44	12	1	214	23.571	5.76		945097	adk; SH08_06180; SH03_06170; SH06_06475; SH04_06160; SH07_06165; SF31_06475			metabolic process	cytoplasm;cytosol	catalytic activity;metal ion binding;nucleotide binding;protein binding	Pf00406, Pf05191, Pf13207, Pf13671	1.161	1.161	1.245	5838000	5899000	5698000	6776000	6848000	7094000		1.1883	0.00149459	30.623	2	112.989	13
FALSE	High	Master Protein	P0A7V3	30S ribosomal protein S3 OS=Escherichia coli (strain K12) GN=rpsC PE=1 SV=2	0	54.8108	47.2103	9	22	9	1	233	25.967	10.27		30330666; 947814; 31870298	APT61_RS02090; rpsC; GLAD_RS12870; SH08_20835; SH03_20730; SH06_21035; SH04_20720; SH07_20725; SF31_21120			cell organization and biogenesis;metabolic process	cytosol;ribosome	catalytic activity;RNA binding;structural molecule activity	Pf00189, Pf07650	1.812	1.82	1.958	5836000	5799000	5672000	10580000	10550000	11100000		1.86225	0.000623997	10.938	0	68.5941	9
FALSE	High	Master Protein	P55084	Trifunctional enzyme subunit beta, mitochondrial OS=Homo sapiens GN=HADHB PE=1 SV=3	0	140.365	51.0549	21	67	21	1	474	51.262	9.41		3032	HADHB	ENSG00000138029.13	2	metabolic process	endoplasmic reticulum;membrane;mitochondrion	catalytic activity;protein binding;RNA binding	Pf00108, Pf00109, Pf02803	1.048	1.01	0.97	5830000	5977000	6083000	6112000	6036000	5902000		1.00894	0.607732	28.126	0	186.947	21
FALSE	High	Master Protein	Q14739	Lamin-B receptor OS=Homo sapiens GN=LBR PE=1 SV=2	0	66.2198	19.8374	14	35	14	1	615	70.658	9.36		3930	LBR	ENSG00000143815.14	1	metabolic process	membrane;nucleus	catalytic activity;DNA binding;protein binding;RNA binding	Pf01222, Pf06966, Pf09465	1.013	0.969	0.995	5825000	5961000	5933000	5902000	5778000	5902000		0.992268	0.478955	9	0	95.142	14
FALSE	High	Master Protein	P08200	Isocitrate dehydrogenase [NADP] OS=Escherichia coli (strain K12) GN=icd PE=1 SV=1	0	134.362	49.5192	26	61	26	1	416	45.727	5.26		945702	icd; SH08_09630			metabolic process;response to stimulus	cytoplasm;cytosol	catalytic activity;metal ion binding;nucleotide binding	Pf00180	1.826	1.748	1.713	5810000	5954000	5892000	10610000	10400000	10090000		1.76144	0.000545427	55.234	0	173.698	26
FALSE	High	Master Protein	Q99471	Prefoldin subunit 5 OS=Homo sapiens GN=PFDN5 PE=1 SV=2	0	54.8958	48.0519	8	28	8	1	154	17.317	6.33		5204	PFDN5	ENSG00000123349.13	12	metabolic process;regulation of biological process	cytoplasm;nucleus	protein binding	Pf02996	1.016	0.96	0.961	5807000	5946000	5749000	5898000	5709000	5527000		0.978974	0.386755	99	0	95.6635	8
FALSE	High	Master Protein	P0A8R0	Regulator of ribonuclease activity A OS=Escherichia coli (strain K12) GN=rraA PE=1 SV=1	0	12.154	12.4224	2	4	2	1	161	17.35	4.2		948419	rraA; SH08_01155; SH03_01150; SH06_01150; SH04_01150; SH07_01155; SF31_01150			metabolic process;regulation of biological process	cytoplasm;cytosol	enzyme regulator activity;protein binding	Pf03737	1.775	1.678	1.897	5794000	5882000	5429000	10280000	9870000	10300000		1.78018	2.28666e-05	1.371	0	13.118	2
FALSE	High	Master Protein	P56378	6.8 kDa mitochondrial proteolipid OS=Homo sapiens GN=MP68 PE=1 SV=1	0.0042103	4.17387	27.5862	2	3	2	1	58	6.658	10.08		9556	C14orf2	ENSG00000156411.9	14		membrane;mitochondrion		Pf08039	1.043	1.018	1.018	5789000	5847000	5596000	6037000	5951000	5695000		1.02617	0.30954	2.162	0	8.51152	2
FALSE	High	Master Protein	Q13423	NAD(P) transhydrogenase, mitochondrial OS=Homo sapiens GN=NNT PE=1 SV=3	0	219.881	35.5433	35	84	33	1	1086	113.823	8.09		23530	NNT	ENSG00000112992.16	5	cellular homeostasis;metabolic process;regulation of biological process;transport	membrane;mitochondrion	catalytic activity;nucleotide binding;transporter activity	Pf01262, Pf02233, Pf05222, Pf12769	0.976	0.976	0.97	5778000	5819000	5791000	5640000	5680000	5617000		0.974063	0.00403221	18.169	1	274.756	35
FALSE	High	Master Protein	P40855	Peroxisomal biogenesis factor 19 OS=Homo sapiens GN=PEX19 PE=1 SV=1	0	77.5058	47.1572	11	33	6	1	299	32.786	4.34		5824	PEX19	ENSG00000162735.18	1	cell organization and biogenesis;metabolic process;regulation of biological process;transport	cytoplasm;cytosol;membrane;nucleus	protein binding	Pf04614	0.983	0.993	1.03	5771000	5788000	5672000	5670000	5748000	5841000		1.00162	0.886896	15.238	0	96.4933	11
FALSE	High	Master Protein	Q96EX1	Small integral membrane protein 12 OS=Homo sapiens GN=SMIM12 PE=1 SV=3	0	12.5217	27.1739	4	5	4	1	92	10.793	8.44		113444	C1orf212; SMIM12	ENSG00000163866.8	1		membrane			1.007	0.886	0.991	5760000	5766000	5382000	5800000	5108000	5331000		0.960433	0.415226	9	0	14.2471	4
FALSE	High	Master Protein	P48735	Isocitrate dehydrogenase [NADP], mitochondrial OS=Homo sapiens GN=IDH2 PE=1 SV=2	0	113.862	49.7788	22	48	21	1	452	50.877	8.69		3418	IDH2	ENSG00000182054.9	15	cell organization and biogenesis;metabolic process;regulation of biological process	cytosol;membrane;mitochondrion;organelle lumen	catalytic activity;metal ion binding;nucleotide binding	Pf00180	0.978	1.014	0.981	5745000	5722000	5742000	5621000	5801000	5631000		0.990935	0.467729	19.893	1	141.496	22
FALSE	High	Master Protein	O76021	Ribosomal L1 domain-containing protein 1 OS=Homo sapiens GN=RSL1D1 PE=1 SV=3	0	169.907	37.9592	22	72	22	1	490	54.939	10.13		26156	RSL1D1	ENSG00000171490.12	16	cell differentiation;metabolic process;regulation of biological process	membrane;nucleus	protein binding;RNA binding	Pf06030, Pf11797	1.011	1.017	1.009	5731000	5679000	5699000	5794000	5777000	5752000		1.01251	0.0231395	80.113	0	248.954	22
FALSE	High	Master Protein	P0A7K6	50S ribosomal protein L19 OS=Escherichia coli (strain K12) GN=rplS PE=1 SV=2	0	34.3651	49.5652	7	19	7	1	115	13.125	10.62		947096	rplS; SH08_17285; SH03_17185; SH06_17490; SH04_17175; SH07_17180; SF31_17535			cell organization and biogenesis;metabolic process	cytosol;ribosome	RNA binding;structural molecule activity	Pf01245	1.829	1.71	1.816	5727000	6082000	5879000	10470000	10400000	10670000		1.78313	6.50359e-06	50.795	0	56.7888	7
FALSE	High	Master Protein	P28482	Mitogen-activated protein kinase 1 OS=Homo sapiens GN=MAPK1 PE=1 SV=3	0	90.033	43.6111	16	46	10	1	360	41.363	6.98		5594	MAPK1	ENSG00000100030.14	22	cell communication;cell death;cell differentiation;cell proliferation;cellular component movement;metabolic process;regulation of biological process;response to stimulus;transport	cytoplasm;cytoskeleton;cytosol;endosome;extracellular;Golgi;membrane;mitochondrion;nucleus;organelle lumen	catalytic activity;DNA binding;nucleotide binding;protein binding;signal transducer activity	Pf00069, Pf01636, Pf07714	0.944	0.994	1.003	5726000	5495000	5392000	5403000	5465000	5408000		0.979715	0.37332	22.101	0	142.722	16
FALSE	High	Master Protein	P31942	Heterogeneous nuclear ribonucleoprotein H3 OS=Homo sapiens GN=HNRNPH3 PE=1 SV=2	0	167.355	59.5376	13	75	12	1	346	36.903	6.87		3189	HNRNPH3	ENSG00000096746.17	10	cell differentiation;metabolic process	nucleus;spliceosomal complex	nucleotide binding;protein binding;RNA binding	Pf00076, Pf14259	0.992	0.978	0.992	5723000	5794000	5749000	5677000	5667000	5705000		0.987432	0.0526926	149.131	0	230.009	13
FALSE	High	Master Protein	P62312	U6 snRNA-associated Sm-like protein LSm6 OS=Homo sapiens GN=LSM6 PE=1 SV=1	0	13.7624	47.5	5	9	5	1	80	9.122	9.58		11157	LSM6	ENSG00000164167.10	4	metabolic process	cytoplasm;cytosol;nucleus;spliceosomal complex	protein binding;RNA binding	Pf01423	1.022	1.164	1.023	5715000	4926000	5318000	5841000	5733000	5441000		1.06617	0.26396	9	0	21.3826	5
FALSE	High	Master Protein	P67809	Nuclease-sensitive element-binding protein 1 OS=Homo sapiens GN=YBX1 PE=1 SV=3	0	247.898	56.7901	17	143	12	1	324	35.903	9.88		4904	YBX1	ENSG00000065978.18	1	metabolic process;regulation of biological process	cytoplasm;cytosol;extracellular;membrane;nucleus;spliceosomal complex	DNA binding;protein binding;RNA binding	Pf00313	1.008	0.99	1.011	5708000	5822000	5909000	5756000	5765000	5975000		1.00327	0.847238	17011.5	7	456.185	17
FALSE	High	Master Protein	B1AHD1	NHP2-like protein 1 OS=Homo sapiens GN=SNU13 PE=1 SV=1	0	58.35	45.4545	7	26	7	1	132	14.618	8.46		4809	NHP2L1; SNU13	ENSG00000100138.13	22	metabolic process	nucleus;spliceosomal complex	protein binding;RNA binding	Pf01248	1.079	0.96	1.132	5703000	6139000	5836000	6153000	5895000	6607000		1.05527	0.267066	55.234	0	88.8163	7
FALSE	High	Master Protein	Q14157	Ubiquitin-associated protein 2-like OS=Homo sapiens GN=UBAP2L PE=1 SV=2	0	257.031	36.0626	25	94	25	1	1087	114.465	7.11		9898	UBAP2L	ENSG00000143569.18	1	regulation of biological process	cytoplasm	protein binding;RNA binding	Pf00627, Pf12478, Pf14555	1.022	0.966	1.009	5695000	5888000	5541000	5818000	5686000	5592000		0.998365	0.942255	42.288	0	340.267	25
FALSE	High	Master Protein	Q13601	KRR1 small subunit processome component homolog OS=Homo sapiens GN=KRR1 PE=1 SV=4	0	57.0555	29.6588	11	22	11	1	381	43.638	9.77		11103	KRR1	ENSG00000111615.13	12	metabolic process	cytoplasm;membrane;nucleus	protein binding;RNA binding	Pf00013	1.05	0.991	0.998	5693000	5631000	5744000	5978000	5583000	5735000		1.01336	0.582081	6.743	0	72.7144	11
FALSE	High	Master Protein	Q8WW12	PEST proteolytic signal-containing nuclear protein OS=Homo sapiens GN=PCNP PE=1 SV=2	0	73.4622	53.3708	8	35	8	1	178	18.913	7.49		57092	PCNP	ENSG00000081154.11	3	metabolic process	nucleus	protein binding	Pf15473	0.99	0.966	0.978	5657000	5768000	5678000	5603000	5573000	5555000		0.978249	0.0519961	30.623	0	119.402	8
FALSE	High	Master Protein	E7EQR4	Ezrin OS=Homo sapiens GN=EZR PE=1 SV=3	0	202.396	37.2014	34	129	20	1	586	69.329	6.16				ENSG00000092820.17	6		cytoplasm;cytoskeleton;membrane	protein binding	Pf00373, Pf00769, Pf09379, Pf09380	0.967	1.004	0.979	5654000	5481000	5596000	5467000	5500000	5481000		0.983085	0.201359	105.8	3	337.186	34
FALSE	High	Master Protein	O95336	6-phosphogluconolactonase OS=Homo sapiens GN=PGLS PE=1 SV=2	0	73.6736	55.4264	11	35	11	1	258	27.53	6.05		25796	PGLS	ENSG00000130313.6	19	metabolic process	cytoplasm;cytosol	catalytic activity;protein binding	Pf01182	0.975	0.97	1.082	5646000	6048000	5532000	5507000	5865000	5985000		1.0076	0.84721	25.827	0	117.393	11
FALSE	High	Master Protein	Q04323	UBX domain-containing protein 1 OS=Homo sapiens GN=UBXN1 PE=1 SV=2	0	74.7815	46.8013	11	29	11	1	297	33.305	5.25		51035	UBXN1	ENSG00000162191.13	11	metabolic process;regulation of biological process	cytoplasm;cytosol;endoplasmic reticulum;nucleus;proteasome	protein binding	Pf00627, Pf00789	0.945	0.956	0.946	5641000	5745000	5617000	5329000	5490000	5317000		0.949009	0.0166795	23.245	0	97.6019	11
FALSE	High	Master Protein	Q13310	Polyadenylate-binding protein 4 OS=Homo sapiens GN=PABPC4 PE=1 SV=1	0	234.251	48.4472	32	108	4	1	644	70.738	9.26		8761	PABPC4	ENSG00000090621.13	1	coagulation;metabolic process	cytoplasm;cytosol;nucleus	nucleotide binding;protein binding;RNA binding	Pf00076, Pf00658, Pf13893, Pf14259	0.98	0.983	0.968	5637000	5637000	5641000	5527000	5542000	5459000		0.977121	0.0367076	61.247	13	348.339	32
FALSE	High	Master Protein	Q14232	Translation initiation factor eIF-2B subunit alpha OS=Homo sapiens GN=EIF2B1 PE=1 SV=1	0	99.1006	52.459	15	39	15	1	305	33.691	7.33		1967	EIF2B1	ENSG00000111361.12	12	metabolic process;regulation of biological process;response to stimulus	cytoplasm;cytosol;membrane	protein binding;RNA binding	Pf01008	1.013	0.994	0.985	5631000	5781000	5624000	5706000	5745000	5538000		0.997241	0.857463	43.367	0	122.407	15
FALSE	High	Master Protein	Q13867	Bleomycin hydrolase OS=Homo sapiens GN=BLMH PE=1 SV=1	0	117.874	31.8681	16	49	16	1	455	52.528	6.27		642	BLMH	ENSG00000108578.14	17	metabolic process;response to stimulus	cytoplasm;cytosol;nucleus	catalytic activity;protein binding	Pf03051	0.985	0.97	1.013	5625000	5653000	5566000	5540000	5487000	5636000		0.989254	0.313062	16.013	0	154.352	16
FALSE	High	Master Protein	P33316	Deoxyuridine 5'-triphosphate nucleotidohydrolase, mitochondrial OS=Homo sapiens GN=DUT PE=1 SV=4	0	68.226	53.9683	10	31	10	1	252	26.547	9.36		1854	DUT	ENSG00000128951.13	15	metabolic process	mitochondrion;nucleus	catalytic activity;protein binding;RNA binding	Pf00692	1.007	0.973	1.028	5603000	5710000	5573000	5640000	5556000	5730000		1.00237	0.848309	10.659	0	111.864	10
FALSE	High	Master Protein	L0R6Q1	Alternative protein SLC35A4 OS=Homo sapiens GN=SLC35A4 PE=1 SV=1	0	34.5308	54.3689	6	13	6	1	103	11.126	8.1		113829	SLC35A4	ENSG00000176087.14	5	regulation of biological process;response to stimulus;transport	Golgi;membrane	transporter activity	Pf06553, Pf15054	1.01	1.122	0.965	5598000	5330000	5945000	5657000	5980000	5739000		1.02981	0.467184	62.096	0	40.5903	6
FALSE	High	Master Protein	O75083	WD repeat-containing protein 1 OS=Homo sapiens GN=WDR1 PE=1 SV=4	0	156.65	39.934	22	61	22	1	606	66.152	6.65		9948	WDR1	ENSG00000071127.16	4	cell differentiation;cell organization and biogenesis;cellular component movement;metabolic process;regulation of biological process;transport	cytoplasm;cytoskeleton;cytosol;extracellular	protein binding	Pf00400, Pf04762, Pf08662, Pf14783	0.992	0.988	0.99	5589000	5598000	5656000	5546000	5529000	5598000		0.989907	0.127359	16.475	0	219.153	22
FALSE	High	Master Protein	Q9BZE1	39S ribosomal protein L37, mitochondrial OS=Homo sapiens GN=MRPL37 PE=1 SV=2	0	89.8041	45.6265	17	37	17	1	423	48.087	8.59		51253	MRPL37	ENSG00000116221.15	1	cell organization and biogenesis;metabolic process	membrane;mitochondrion;ribosome	RNA binding;structural molecule activity	Pf07147	1.006	0.972	0.99	5588000	5800000	5758000	5622000	5639000	5699000		0.989152	0.445974	5.723	0	122.756	17
FALSE	High	Master Protein	H0YMV8	40S ribosomal protein S27 OS=Homo sapiens GN=RPS27L PE=1 SV=1	0	40.0508	33	4	33	2	1	100	11.338	9.32				ENSG00000185088.13	15	metabolic process	ribosome	metal ion binding;structural molecule activity	Pf01667	0.95	0.983	1.059	5585000	5499000	5494000	5308000	5406000	5817000		0.997165	0.929824	629.957	5	88.9921	4
FALSE	High	Master Protein	Q9H0D6	5'-3' exoribonuclease 2 OS=Homo sapiens GN=XRN2 PE=1 SV=1	0	214.834	35.3684	33	98	33	1	950	108.513	7.47		22803	XRN2	ENSG00000088930.7	20	cell differentiation;cell growth;metabolic process;regulation of biological process	membrane;nucleus	catalytic activity;DNA binding;metal ion binding;protein binding;RNA binding	Pf03159	1.01	0.993	0.962	5582000	5590000	5586000	5639000	5553000	5373000		0.988483	0.498017	13.35	0	295.359	33
FALSE	High	Master Protein	Q13257	Mitotic spindle assembly checkpoint protein MAD2A OS=Homo sapiens GN=MAD2L1 PE=1 SV=1	0	37.6033	33.1707	7	13	7	1	205	23.495	5.08		4085	MAD2L1	ENSG00000164109.13	4	cell division;cell organization and biogenesis;metabolic process;regulation of biological process	chromosome;cytoplasm;cytoskeleton;cytosol;nucleus	protein binding	Pf02301	1.18	0.973	1.107	5572000	6161000	6105000	6574000	5996000	6760000		1.08364	0.172075	6.197	0	40.8827	7
FALSE	High	Master Protein	P13804	Electron transfer flavoprotein subunit alpha, mitochondrial OS=Homo sapiens GN=ETFA PE=1 SV=1	0	159.365	54.0541	14	74	14	1	333	35.058	8.38		2108	ETFA	ENSG00000140374.15	15	metabolic process;transport	mitochondrion;organelle lumen	catalytic activity;nucleotide binding;protein binding	Pf00766, Pf01012	0.974	0.989	0.971	5563000	5569000	5669000	5419000	5509000	5502000		0.977918	0.0528646	62.096	0	253.331	14
FALSE	High	Master Protein	Q15084	Protein disulfide-isomerase A6 OS=Homo sapiens GN=PDIA6 PE=1 SV=1	0	174.592	40.9091	17	80	17	1	440	48.091	5.08		10130	PDIA6	ENSG00000143870.12	2	cellular homeostasis;metabolic process;regulation of biological process;response to stimulus;transport	cytosol;endoplasmic reticulum;membrane;organelle lumen	catalytic activity;protein binding	Pf00085, Pf13098, Pf13848, Pf13899, Pf13905	0.973	0.983	0.961	5554000	5470000	5548000	5403000	5379000	5331000		0.972303	0.0127309	77.476	0	266.135	17
FALSE	High	Master Protein	F8W8Z9	Mitochondrial import receptor subunit TOM5 homolog OS=Homo sapiens GN=TOMM5 PE=1 SV=1	0.000527218	7.9113	25.5102	4	6	4	1	98	10.969	7.02				ENSG00000175768.12	9		mitochondrion		Pf15178	0.951	1.007	0.977	5548000	5528000	5589000	5274000	5569000	5463000		0.978458	0.298278	2.728	0	15.586	4
FALSE	High	Master Protein	O95298	NADH dehydrogenase [ubiquinone] 1 subunit C2 OS=Homo sapiens GN=NDUFC2 PE=1 SV=1	0	14.1366	25.2101	3	6	3	1	119	14.178	8.98		4718	NDUFC2	ENSG00000151366.12	11	cell organization and biogenesis;metabolic process;transport	cytoplasm;membrane;mitochondrion	catalytic activity	Pf06374	0.929	0.953	0.918	5522000	5282000	5362000	5130000	5032000	4920000		0.932946	0.0185539	4.623	0	16.7314	3
FALSE	High	Master Protein	Q02978	Mitochondrial 2-oxoglutarate/malate carrier protein OS=Homo sapiens GN=SLC25A11 PE=1 SV=3	0	66.7144	40.7643	11	33	11	1	314	34.04	9.91		8402	SLC25A11	ENSG00000108528.13	17	metabolic process;transport	membrane;mitochondrion;nucleus	RNA binding;transporter activity	Pf00153	0.97	0.985	0.983	5519000	5539000	5445000	5352000	5454000	5353000		0.979155	0.0624495	9	0	107.118	11
FALSE	High	Master Protein	Q9BQG0	Myb-binding protein 1A OS=Homo sapiens GN=MYBBP1A PE=1 SV=2	0	393.666	40.1355	50	176	50	1	1328	148.762	9.28		10514	MYBBP1A	ENSG00000132382.14	17	cell communication;cell differentiation;metabolic process;regulation of biological process;response to stimulus;transport	cytoplasm;membrane;nucleus	catalytic activity;DNA binding;protein binding;RNA binding	Pf04931, Pf05793, Pf11593, Pf12815	1.016	1.001	1.006	5518000	5629000	5669000	5609000	5634000	5703000		1.00773	0.469286	26.438	0	539.171	50
FALSE	High	Master Protein	P53618	Coatomer subunit beta OS=Homo sapiens GN=COPB1 PE=1 SV=3	0	266.045	40.9234	33	99	33	1	953	107.074	6.05		1315	COPB1	ENSG00000129083.12	11	transport	cytoplasm;cytosol;Golgi;membrane	protein binding;structural molecule activity	Pf01602, Pf07718, Pf14806	0.982	0.995	0.973	5514000	5438000	5626000	5415000	5409000	5477000		0.983291	0.227049	24.119	0	299.964	33
FALSE	High	Master Protein	Q9BVC6	Transmembrane protein 109 OS=Homo sapiens GN=TMEM109 PE=1 SV=1	0	20.0072	9.0535	3	8	3	1	243	26.194	10.48		79073	TMEM109	ENSG00000110108.9	11	regulation of biological process;response to stimulus;transport	endoplasmic reticulum;membrane;nucleus	transporter activity	Pf14965	1.041	1.053	0.988	5508000	5395000	5519000	5731000	5681000	5453000		1.02698	0.220971	3.642	0	24.8726	3
FALSE	High	Master Protein	P0ABD8	Biotin carboxyl carrier protein of acetyl-CoA carboxylase OS=Escherichia coli (strain K12) GN=accB PE=1 SV=1	0.00340047	4.53467	5.12821	1	3	1	1	156	16.676	4.65		947758	accB; SH08_20535; SH03_20430; SH06_20735; SH04_20420; SH07_20425; SF31_20820			cell growth;metabolic process	cytoplasm;cytosol	catalytic activity;protein binding	Pf00364	1.617	1.586	1.599	5508000	5336000	4952000	8906000	8462000	7920000		1.60091	0.00182564	0.778	0	7.04773	1
FALSE	High	Master Protein	P0AGE9	Succinate--CoA ligase [ADP-forming] subunit alpha OS=Escherichia coli (strain K12) GN=sucD PE=1 SV=2	0	101.349	44.2907	11	43	10	1	289	29.759	6.79		945314	sucD; SH08_07495; SH03_07495; SH06_07800; SH04_07485; SH07_07490; SF31_07800			metabolic process	cytoplasm;cytosol	catalytic activity;nucleotide binding;protein binding	Pf00549, Pf02629, Pf13380, Pf13607	1.717	1.714	1.661	5507000	5494000	5700000	9454000	9419000	9469000		1.69702	0.000159323	32.839	0	147.639	11
FALSE	High	Master Protein	P13073	Cytochrome c oxidase subunit 4 isoform 1, mitochondrial OS=Homo sapiens GN=COX4I1 PE=1 SV=1	0	82.31	49.7041	11	52	11	1	169	19.564	9.51		1327	COX4I1	ENSG00000131143.8	16	metabolic process;response to stimulus;transport	membrane;mitochondrion;nucleus	catalytic activity;protein binding;transporter activity	Pf02936	0.98	0.998	1.002	5500000	5323000	5405000	5389000	5310000	5418000		0.99316	0.579418	186.382	0	155.723	11
FALSE	High	Master Protein	O75821	Eukaryotic translation initiation factor 3 subunit G OS=Homo sapiens GN=EIF3G PE=1 SV=2	0	102.733	48.125	15	57	2	1	320	35.589	6.13		8666	EIF3G	ENSG00000130811.11	19	metabolic process	cytoplasm;cytosol;nucleus	nucleotide binding;protein binding;RNA binding	Pf00076, Pf12353, Pf13893, Pf14259	0.982	1.001	1.006	5498000	5454000	5355000	5398000	5462000	5387000		0.996321	0.705774	57.171	14	187.806	15
FALSE	High	Master Protein	O43819	Protein SCO2 homolog, mitochondrial OS=Homo sapiens GN=SCO2 PE=1 SV=3	0	36.1074	26.6917	7	16	7	1	266	29.791	8.85		9997	SCO2	ENSG00000130489.14; ENSG00000284194.1	22	cell organization and biogenesis;cellular homeostasis;metabolic process;regulation of biological process;transport	membrane;mitochondrion;organelle lumen	antioxidant activity;catalytic activity;metal ion binding;protein binding	Pf00578, Pf02630, Pf13905	0.935	0.967	0.968	5487000	5427000	5385000	5133000	5246000	5212000		0.956562	0.00642202	3.642	0	50.0776	7
[truncated: 7,935 more rows]

## Sheet: 30K_25%Iso_MaxQuant
Protein IDs	Majority protein IDs	Peptide counts (all)	Peptide counts (razor+unique)	Peptide counts (unique)	Fasta headers	Number of proteins	Peptides	Razor + unique peptides	Unique peptides	Sequence coverage [%]	Unique + razor sequence coverage [%]	Unique sequence coverage [%]	Mol. weight [kDa]	Sequence length	Sequence lengths	Q-value	Score	Reporter intensity corrected 0	Reporter intensity corrected 1	Reporter intensity corrected 2	Reporter intensity corrected 3	Reporter intensity corrected 4	Reporter intensity corrected 5	Reporter intensity 0	Reporter intensity 1	Reporter intensity 2	Reporter intensity 3	Reporter intensity 4	Reporter intensity 5	Normalized0	Normalized1	Normalized2	Normalized3	Normalized4	Normalized5	CN0	CN1	CN2	CN3	CN4	CN5	Ratio	P value
[truncated: 8,704 more rows]

[truncated: 2 more sheets: 30K_25%Iso_PD_P_Value, 30K_25%Iso_PD_15%RSD]
